# Supplementary material for: Zebrafish embryonic explants undergo genetically encoded self-assembly
Source: eLife. 2020 Apr 6;9:e55190. doi: 10.7554/eLife.55190 (PMC7190352; doi:10.7554/eLife.55190)
Supplement: Figure 1—figure supplement 1—source data 1. [file elife-55190-fig1-figsupp1-data1.xlsx]

## Sheet: Sheet1
Figure 1 - Supplement 1
B. Luminal cavity localization
Normalized distance extension tip-cavity	Normalized distance extension cavity-explant back
0.698931	0.0375823
0.741329	0.00728629
0.442041	0.0981908
0.769066	0.0167081
0.506691	0.0705154
0.525749	0.05164
0.569917	0.0558778
0.533395	0.122786
0.409182	0.0421973
0.573321	0.053801
0.570291	0.0405148
0.692289	0.0916897
0.56717	0.0460746
0.512707	0.072821
0.516667	0.0262894
0.771049	0.0371527
0.616688	0.070644
0.666204	0.0358767
0.658756	0.0423975
0.538385	0.0394428
0.562181	0.0934575
0.735411	0.0436524
0.592555	0.110938
0.51881	0.0739808
0.493042	0.0560412
0.538757	0.0403944
0.508215	0.0481038
0.487928	0.0408936
0.576043	0.0274266
0.574141	0.0937478
0.520718	0.0448583
0.440315	0.0446003
0.48736	0.0397531
0.640795	0.091959
0.704661	0.0336426
0.635044	0.0587924
0.619877	0.0685088
0.716158	0.0311181
0.634865	0.0392378
0.561132	0.0299501
0.453849	0.136705
0.431528	0.110304
0.703129	0.113035
0.442167	0.0756166
0.393715	0.0789158
0.55688	0.0773858
0.509594	0.0634702
0.452701	0.0417258
0.515391	0.107302
0.548525	0.0395406
0.518962	0.0663301
0.629897	0.0479923
0.570732	0.0181344
0.635223	0.0616331
0.625176	0.0489843
0.635129	0.0287292
0.66848	0.0215083
0.834548	0.023189
0.795778	0.040458
0.571547	0.0459909
0.433404	0.131273
0.545586	0.0344431
0.509589	0.0887119
0.644271	0.0926971
0.629777	0.0431182
0.624698	0.0235966
0.600043	0.0403921
0.654294	0.032724
0.496785	0.0295959
0.507452	0.0334954
0.536923	0.10241
0.612407	0.186909
0.515696	0.0908936
0.55234	0.192433
0.494035	0.093306
0.492865	0.0511853
0.580416	0.0651437
0.696353	0.0918372
0.478691	0.157229
0.590932	0.148039
0.47702	0.128497
0.626362	0.0259528
0.589279	0.178255
0.68708	0.0876571
0.614696	0.109777
0.588063	0.100478
0.646288	0.198253
0.339753	0.136035
0.535661	0.109162
0.441234	0.219628
C. Cell size
high		sphere		30% epiboly		50% epiboly		Germ ring		shield
Embryo	Explant	Embryo	Explant	Embryo	Explant	Embryo	Explant	Embryo	Explant	Embryo	Explant
29.946	32.003	22.254	23.161	24.658	23.456	15.096	21.847	14.244	20.284	17.328	17.918
30.489	24.802	21.33	21.291	21.095	20.109	14.653	20.378	13.71	19.976	14.981	17.351
16.369	28.763	22.623	23.594	20.128	20.802	17.525	22.163	16.926	19.148	12.223	20.14
32.486	36.415	23.22	25.828	21.339	32.275	13.918	22.783	16.583	17.869	12.401	18.787
27.609	24.177	27.953	23.102	23.944	25.385	14.409	22.289	16.519	17.094	12.576	19.54
24.858	23.663	22.828	15.721	24.41	18.066	15.623	30.744	9.678	16.015	14.244	14.017
29.468	35.694	24.223	19.911	19.293	21.36	13.734	23.473	16.859	15.436	11.279	17.351
29.846	29.946	21.445	34.826	21.472	23.494	16.674	15.436	18.627	10.189	16.026	15.436
26.662	24.614	21.648	32.946	19.276	19.624	16.613	20.228	16.549	14.627	15.11	13.122
31.806	24.414	20.345	31.651	19.095	20.134	13.17	15.631	17.385	17.64	15.03	15.403
33.725	26.917	24.581	33.407	18.648	26.267	16.727	33.849	14.089	12.809	10.443	21.36
25.153	32.746	19.897	25.24	22.21	25.028	16.727	21.408	15.72	21.14	16.431	14.601
35.068	25.797	29.772	17.747	18.795	22.503	14.859	23.348	15.089	16.11	16.426	18.427
25.498	22.06	24.492	19.69	19.001	21.014	24.486	20.802	11.702	10.769	16.122	16.204
28.109	18.954	17.87	21.597	19.473	15.607	18.143	17.869	15.413	15.304	10.635	13.817
30.174	42.35	17.901	23.031	23.832	20.532	21.643	31.733	16.227	19.423	17.876	15.104
27.45	29.662	24.681	23.813	25.364	22.916	17.669	25.938	16.391	13.064	13.687	27.028
26.805	22.635	26.713	24.087	19.659	19.048	22.334	14.67	16.302	17.576	17.417	8.902
22.196	22.78	25.754	29.919	23.473	21.14	13.054	17.612	16.524	22.289	13.381	24.32
30.641	26.672	22.246	21.559	16.227	22.532	13.99	25.465	23.628	10.507	12.183	16.915
33.407	28.924	24.256	20.506	21.831	23.456	16.757	19.54	14.78	14.601	11.386	18.003
25.294	16.765	18.853	26.05	27.064	20.483	14.312	21.496	15.302	15.656	12.525	21.661
26.713	23.675	21.457	19.648	24.897	20.526	14.696	13.734	12.583	17.175	10.839	18.841
23.22	27.4	24.075	23.87	20.32	21.608	19.906	24.553	11.054	23.283	15.658	14.125
19.198	19.897	32.846	26.05	23.71	20.434	16.383	21.02	15.408	10.263	14.769	15.656
29.075	33.407	18.663	18.94	17.935	19.573	19.682	28.358	13.094	13.399	11.185	17.116
25.797	26.144	21.495	30.174	25.412	25.43	18.143	31.38	12.963	17.212	14.845	20.039
29.132	24.414	24.625	29.745	21.179	17.64	18.24	20.996	10.817	24.179	12.289	23.863
26.134	25.272	20.546	27.718	18.609	18.679	12.829	21.074	12.223	11.173	10.628	14.035
27.44	27.079	24.402	18.853	24.897	31.505	15.129	12.61	11.736	15.992	10.628	15.096
34.439	26.144	19.198	22.84	22.067	15.992	19.624	12.284	19.264	17.467	11.839	15.542
32.08	31.46	23.813	21.495	23.348	22.419	15.912	16.259	17.794	14.392	11.839	9.454
20.184	31.416	17.452	19.41	25.93	24.595	17.226	22.949	17.584	16.047	8.893	15.72
29.91	24.143	20.399	23.813	25.21	22.8	15.012	15.138	16.666	23.196	11.702	19.358
34.192	24.223	23.489	19.198	23.118	25.385	16.227	15.079	16.227	19.022	13.863	13.881
27.609	32.486	25.022	21.046	17.088	23.13	14.696	13.881	12.137	24.2	16.51	13.918
29.3	22.06	29.763	15.441	27.052	21.725	24.569	22.192	17.477	18.841	17.712	23.196
37.092	26.795	22.06	24.581	21.997	23.048	17.116	15.096	15.429	22.955	10.35	13.744
29.579	25.445	20.599	30.757	26.556	19.772	14.593	12.118	12.525	21.325	16.549	16.613
19.083	21.961	19.979	15.599	23.535	21.725	14.593	20.941	13.333	15.171	10.466	17.212
24.581	24.625	23.102	29.328	23.128	23.655	16.659	21.614	18.186	23.408	12.583	15.793
20.02	28.158	23.675	22.06	24.506	19.906	18.178	20.153	10.536	21.23	16.744	13.549
23.767	20.559	21.836	24.075	23.764	25.34	18.679	15.888	10.869	17.212	13.29	14.627
27.704	26.207	28.839	26.456	29.345	21.158	16.173	18.915	14.587	12.58	13.675	16.11
24.618	28.773	19.979	16.535	25.152	34.35	20.941	18.72	13.502	16.795	7.291	12.888
36.156	31.39	22.575	17.809	24.608	20.39	17.027	13.083	10.318	19.599	12.844	11.961
21.221	31.39	26.05	22.923	28.465	17.116	14.936	15.672	13.663	27.858	13.278	11.173
14.997	27.797	19.911	14.03	19.293	21.496	16.817	22.532	15.073	16.75	14.278	12.428
24.184	15.082	21.949	24.791	21.678	23.969	19.227	16.383	15.318	16.227	12.537	20.434
22.184	27.36	29.356	26.795	21.771	18.787	15.599	13.502	17.712	26.185	13.532	20.851
29.882	23.102	20.941	18.264	26.826	21.496	20.378	21.847	18.674	16.674	10.16	12.16
19.996	25.881	18.264	26.917	33.492	29.176	13.521	18.066	13.675	18.296	14.413	17.869
26.398	21.986	18.619	27.688	24.717	27.753	15.801	25.623	13.769	15.672	12.963	14.232
21.669	24.053	21.291	24.791	22.503	25.465	16.727	23.456	11.757	17.869	11.839	18.038
23.581	23.208	17.2	19.354	25.644	24.861	18.178	26.171	13.29	13.981	11.887	17.698
24.115	26.508	19.354	20.758	25.587	21.349	17.329	21.164	10.988	22.054	18.359	17.676
20.483	29.809	17.072	10.931	23.944	25.564	16.39	19.727	11.214	19.65	15.95	17.38
17.674	20.345	22.923	16.872	25.268	21.829	16.015	17.612	14.96	12.986	8.463	12.61
22.032	30.11	24.858	20.009	23.362	22.616	16.383	18.861	13.186	22.054	10.628	15.138
23.304	19.979	26.332	32.574	24.486	19.624	17.109	21.783	16.026	23.99	15.429	12.098
37.662	31.443	15.825	23.149	29.185	22.487	16.047	22.733	11.4	23.218	16.583	13.083
28.544	39.199	21.216	26.887	23.435	21.408	19.573	14.593	12.982	17.329	16.207	7.812
38.919	42.046	16.976	22.935	24.615	21.538	17.669	17.226	11.163	14.125	11.702	23.048
27.27	31.066	14	25.445	23.868	23.655	16.047	14.25	12.183	15.984	18.084	13.208
32.612	25.871	18.667	22.635	23.087	20.284	16.055	16.134	18.522	18.185	14.763	12.62
47.257	21.445	20.914	32.486	23.969	18.841	16.227	12.829	12.349	19.54	13.669	13.399
25.445	35.938	21.626	17.31	22.816	23.261	18.564	15.984	15.153	11.173	15.191	23.261
27.27	30.453	19.294	17.901	23.348	21.643	18.15	19.365	12.888	16.259	14.061	13.399
31.066	34.088	12.127	19.413	31.027	22.844	14.514	17.351	18.731	17.373	15.539	9.454
32.241	24.075	22.652	31.924	29.085	21.068	18.988	17.791	13.532	13.817	12.17	20.686
26.165	21.33	14.724	16.589	24.825	23.586	18.7	22.345	14.278	12.181	12.434	12.499
35.938	25.466	18.616	17.354	25.305	27.51	20.832	18.618	19.293	13.845	21.335	15.304
24.492	27.787	20.927	24.041	22.616	31.416	18.143	15.337	14.095	26.344	8.838	15.801
29.964	35.938	16.589	32.072	25.43	22.971	17.918	9.679	17.753	16.915	7.03	25.165
30.318	38.743	18.316	19.538	19.727	25.742	19.573	15.992	18.079	17.027	13.143	17.576
41.012	26.713	18.638	26.127	16.727	27.455	18.727	12.003	14.845	15.984	16.426	14.868
26.662	31.486	16.051	26.127	18.888	20.996	17.525	15.129	14.061	16.87	9.736	13.285
29.809	28.991	18.049	15.916	26.707	18.564	21.134	15.672	15.658	14.627	9.363	17.226
26.144	25.272	16.193	19.426	18.502	16.452	14.098	9.77	12.907	14.67	13.309	15.304
21.033	33.235	13.528	24.487	17.791	23.267	19.906	14.25	14.976	13.502	16.032	11.584
25.153	33.012	16.318	17.708	22.666	21.678	18.908	16.11	8.938	15.104	10.802	12.499
26.508	21.445	18.783	29.089	23.218	25.265	17.869	22.783	12.11	22.694	11.948	13.881
29.579	23.675	18.926	16.928	20.128	23.494	17.373	17.094	14.181	18.316	15.329	14.67
23.813	34.312	13.518	21.419	22.783	20.253	23.586	17.138	10.876	16.39	10.635	14.089
25.109	30.345	17.103	24.31	23.586	26.788	19.579	17.576	13.29	16.613	13.693	9.988
26.477	35.131	12.489	29.089	21.408	22.106	16.757	20.539	12.427	15.631	12.077	19.161
27.36	20.116	13.648	13.737	21.87	24.677	16.227	14.627	18.924	14.67	8.643	13.285
29.169	29.075	16.152	13.368	21.158	21.939	18.233	24.779	15.191	19.976	15.11	18.888
28.303	36.714	17.478	16.8	22.604	22.106	16.878	11.779	13.951	21.074	11.618	19.423
23.536	27.993	17.928	18.427	18.72	25.445	22.441	18.233	14.763	16.636	12.812	22.072
36.803	38.03	25.109	29.809	25.27	19.49	14.52	21.271	18.557	9.901	17.175	17.605
37.706	28.801	24.075	33.927	23.858	20.53	18.765	19.074	14.492	18.535	11.047	12.58
44.522	36.602	23.031	24.223	24.738	20.12	14.96	17.027	18.439	13.693	19.65	19.128
58.009	41.883	18.368	22.923	23.714	19.175	18.924	21.797	15.782	16.391	15.171	16.383
37.334	30.775	26.144	18.487	23.147	17.477	14.295	17.712	14.627	14.542	19.804	12.634
34.763	35.801	32.687	19.41	26.113	19.676	24.579	24.153	17.805	11.757	14.859	13.162
33.235	36.602	27.718	24.481	21.707	20.621	17.31	16.816	17.698	13.532	13.237	12.64
44.919	25.185	23.22	24.581	20.039	23.142	14.653	20.451	16.727	13.381	17.027	15.239
36.083	34.826	22.38	27.4	27.51	18.226	17.496	13.278	17.783	9.475	13.083	15.159
32.41	46.44	26.662	25.924	17.467	24.579	21.622	15.859	16.878	10.184	14.409	14.413
33.407	36.121	31.59	23.149	22.289	18.726	14.084	15.859	12.003	15.966	14.312	11.702
40.751	29.809	31.207	23.996	20.941	25.691	19.659	18.847	17.138	9.901	7.48	10.658
40.677	37.04	21.495	29.449	23.58	17.685	16.282	17.328	13.294	12.907	12.986	25.386
29.103	36.264	22.246	27.15	24.553	21.577	18.821	12.083	15.501	14.335	16.259	12.183
27.718	41.072	24.858	23.031	25.16	23.514	16.102	15.966	16.429	13.381	9.718	14.587
27.45	30.819	26.05	27.52	21.643	20.703	14.061	19.527	17.079	8.53	16.452	17.088
31.9	21.748	22.575	18.531	23.234	20.164	17.197	13.951	14.488	12.787	14.25	7.775
33.012	37.568	21.457	22.06	26.971	18.613	13.663	19.742	14.098	12.793	12.67	14.981
32.671	39.024	28.801	22.539	25.069	21.396	19.137	17.422	18.185	12.183	13.595	12.17
32.821	44.133	25.669	23.031	25.658	21.771	16.426	12.64	17.847	6.926	16.915	12.316
33.07	38.452	24.503	26.144	19.65	26.829	21.964	15.11	14.232	11.163	18.038	13.769
40.999	33.366	22.971	23.031	21.074	26.474	23.027	12.882	15.76	16.524	13.399	11.736
24.177	44.368	22.635	26.477	22.755	21.091	19.729	10.096	15.72	9.398	12.098	12.083
25.153	36.121	17.885	33.02	26.483	20.933	18.924	19.243	12.428	13.769	11.036	17.717
30.89	33.35	14.528	29.699	23.842	17.699	12.938	17.584	17.525	15.191	19.161	9.967
32.746	31.338	20.941	24.256	22.072	19.925	19.431	19.327	16.727	12.009	16.975	20.902
30.028	45.518	22.06	28.255	18.942	17.328	17.291	14.02	13.054	11.393	12.098	15.72
27.52	41.437	21.188	25.797	22.06	22.199	15.539	14.295	15.912	13.526	13.083	9.475
45.404	34.12	29.141	18.368	29.79	25.22	13.186	13.622	13.734	12.812	17.116	11.702
33.636	41.337	29.662	20.546	20.284	23.379	21.396	13.758	17.467	12.243	16.173	12.077
45.325	34.637	25.722	35.068	22.705	18.847	21.46	13.974	14.098	21.064	15.129	12.486
46.31	30.89	27.079	32.216	30.38	20.921	15.302	12.322	14.179	13.74	11.929	13.381
36.661	35.717	28.109	22.84	17.38	24.867	18.864	21.014	12.16	12.888	11.747	12.434
39.863	32.846	33.276	28.924	23.494	19.293	13.71	15.843	11.475	9.267	12.58	14.976
41.831	35.771	28.303	34.256	21.678	20.099	19.137	16.821	13.37	15.539	9.4	11.618
40.293	34.024	27.52	30.21	25.27	20.132	16.95	16.811	16.329	14.845	22.822	12.243
32.003	30.174	21.495	23.208	25.742	17.699	16.627	16.821	15.337	14.278	8.802	14.763
39.822	37.793	25.541	34.526	24.305	20.621	22.173	14.692	14.017	15.925	13.744	13.974
39.684	29.946	30.318	28.877	18.888	18.003	21.43	14.9	11.139	12.009	16.506	13.063
45.542	30.453	23.628	33.481	19.925	18.795	19.692	10.995	15.213	13.186	13.734	9.942
47.1	28.801	26.332	29.964	18.516	18.903	16.549	10.719	13.817	12.787	14.961	12.103
48.608	40.367	30.961	32.241	17.504	16.797	15.382	31.409	15.279	11.59	13.083	13.769
34.81	36.973	28.061	14.528	25.285	28.273	25.117	12.401	14.799	15.679	17.467	12.077
30.354	44.473	25.294	27.48	25.796	28.863	16.642	22.203	14.418	13.904	12.003	13.74
38.919	31.994	19.083	30.174	17.576	28.354	17.685	22.718	14.017	16.032	13.064	17.328
39.024	34.088	27.609	22.295	23.655	24.897	19.63	15.658	11.747	19.04	13.427	15.782
38.743	39.303	23.675	28.139	23.735	21.663	16.549	15.329	15.728	9.501	13.399	9.294
29.169	30.174	26.008	23.384	18.7	26.854	16.926	15.782	11.747	20.875	13.817	13.496
56.219	29.809	25.627	22.246	27.028	18.164	19.086	22.579	15.801	13.106	12.118	14.43
30.21	34.526	23.996	23.384	24.595	23.128	21.786	15.132	21.164	15.297	15.501	11.365
36.06	37.393	27.48	19.842	23.152	22.665	17.717	17.417	28.362	13.205	12.888	17.685
40.724	37.136	31.46	31.416	23.671	22.107	18.084	14.542	16.11	13.502	12.937	14.295
53.986	27.609	23.384	22.356	20.209	21.351	18.903	19.527	7.956	12.73	12.937	14.78
38.26	29.141	23.22	24.581	27.455	21.92	13.863	22.575	13.399	16.598	10.615	6.843
36.922	26.508	30.399	20.718	20.489	20.216	17.422	19.427	14.67	18.003	10.263	20.948
34.471	31.994	22.246	22.828	18.233	20.566	22.384	11.3	19.26	11.757	14.303	15.492
40.231	32.436	28.109	21.648	28.611	27.385	17.989	14.981	17.467	13.974	12.428	18.297
40.102	32.08	23.767	25.022	21.396	23.514	16.563	20.192	14.808	15.371	9.36	11.457
41.099	22.49	30.164	31.59	22.554	16.192	16.563	16.797	16.39	12.608	13.981	14.112
41.831	39.296	24.414	25.109	20.649	17.314	17.676	15.175	13.981	10.318	12.7	13.675
43.074	36.083	30.028	26.05	15.631	25.078	23.01	16.989	15.888	11.054	10.674	11.702
32.545	42.046	31.093	22.38	23.57	24.116	17.911	25.39	16.817	14.227	12.171	16.192
29.809	40.082	27.48	26.876	24.579	28.593	15.623	18.765	14.627	12.576	7.812	9.795
42.486	37.778	29.141	24.256	25.509	23.71	19.93	19.885	17.504	9.999	12.003	9.569
37.662	27.787	32.746	25.924	24.429	28.72	21.617	19.124	15.304	15.371	14.67	12.793
49.891	22.935	27.079	19.24	16.506	21.532	22.369	11.894	17.027	14.084	12.499	12.486
34.526	37.648	28.109	26.508	22.072	21.551	24.085	15.966	16.908	16.519	15.912	13.143
34.407	29.449	25.637	22.49	23.408	21.366	20.83	19.124	16.757	8.671	16.11	15.429
34.312	35.87	28.313	25.098	26.674	20.372	18.563	17.23	16.636	11.736	17.791	16.426
33.757	35.154	20.345	30.489	26.612	17.23	20.933	23.352	19.906	15.782	12.829	13.143
38.919	36.714	30.677	20.184	23.152	18.025	20.83	19.737	15.279	11.3	13.549	16.102
37.04	39.199	30.354	23.582	22.192	20.228	18.838	15.879	18.618	10.951	10.127	10.318
38.346	38.367	25.53	21.748	23.13	22.286	17.837	15.679	18.645	12.844	9.36	11.969
40.347	36.773	34.471	27.718	20.747	27.261	16.717	18.856	16.727	12.583	12.254	6.158
38.374	39.192	24.858	28.313	25.285	24.486	24.412	17.088	19.65	11.527	14.523	12.982
38.919	40.832	29.809	30.345	23.043	19.356	18.303	17.657	12.809	8.856	15.229	14.653
57.683	34.399	27.15	22.159	27.233	22.665	23.606	23.617	17.576	13.205	20.209	10.876
32.436	44.589	34.304	30.453	22.816	23.71	24.567	14.769	20.052	12.882	9.36	8.454
39.718	30.101	27.953	24.143	20.655	27.858	15.822	21.244	14.696	13.4	12.888	13.381
45.114	36.534	29.846	16.218	22.47	30.178	16.992	15.884	23.799	12.479	12.7	16.426
41.889	33.111	26.228	29.132	18.942	24.317	21.959	16.549	19.855	15.153	15.534	13.327
50.354	35.494	32.105	21.748	20.539	21.532	21.286	21.072	15.542	10.628	19.65	12.812
39.248	31.529	25.966	19.183	21.661	23.118	20.735	24.274	22.487	10.184	10.361	13.502
42.511	28.773	26.917	29.616	19.161	18.748	15.906	20.216	12.377	12.077	17.138	14.653
46.61	26.508	25.24	15.808	18.461	24.645	23.829	10.474	14.868	11.228	11.047	13.526
39.38	32.283	34.256	28.563	26.574	23.044	18.546	17.607	20.052	14.96	18.915	15.72
39.255	43.074	34.407	19.41	24.507	21.244	16.687	18.864	18.296	12.183	12.118	16.51
27.119	29.809	27.119	19.523	18.038	24.116	18.838	18.093	12.829	20.777	16.757	10.899
38.26	39.863	27.52	19.523	23.911	30.763	19.586	15.864	15.801	21.091	12.809	12.479
39.801	22.49	30.21	23.384	26.098	17.385	20.421	17.953	17.467	20.546	13.17	14.413
29.356	32.139	29.699	26.134	21.939	20.128	16.666	22.755	17.027	12.289		16.757
29.809	30.961	20.184	23.767	24.947	21.98	14.627	24.779	22.283	14.321		12.428
31.373	31.382	26.394	22.06	20.686	21.23	17.212	27.487	21.164	18.454		10.361
28.448	36.714	26.631	26.144	22.733	16.975	21.87	23.868	15.279	13.817		11.747
33.481	34.881	27.51	19.979	24.206	23.494	14.961	12.254	17.138	20.723		14.418
30.89	33.235	27.45	21.149	20.686	19.358	17.373	20.153	14.321	19.624		14.593
41.311	24.177	26.876	22.184	21.847	23.842	18.787	15.403	13.845	11.475		12.284
30.89	29.056	22.06	29.056	23.348	23.092	15.096	20.483	15.672	13.237		18.516
24.177	26.508	24.414	27.079	22.616	17.116	18.618	14.799	17.438	13.595		19.332
27.19	43.029	22.959	25.098	21.026	16.795	20.209	14.593	17.109	10.361		9.494
32.486	30.89	25.669	23.22	18.948	16.429	17.676	17.833	19.65	14.799		20.284
33.481	38.459	23.582	21.748	20.483	18.841	15.329	20.184	15.984	12.62		13.688
39.636	40.905	17.326	24.075	20.686	20.128	19.26	18.296	13.294	16.452		12.003
31.763	25.637	28.303	25.669	25.325	19.624	16.795	18.988	11.036	14.859		14.868
27.836	26.672	24.625	20.453	20.353	22.106	18.038	18.122	14.409	11.747		13.399
32.946	31.102	17.2	24.391	22.419	21.496	17.576	18.122	11.961	15.534		12.888
19.648	20.915	24.177	20.915	24.409	20.802	17.438	18.861	13.734	17.138		15.403
45.132	24.447	24.847	26.988	23.527	17.791	18.233	14.67	14.321	17.351		13.054
39.993	28.716	23.208	26.713	20.284	20.284	22.192	12.499	15.104	13.549		13.688
28.109	35.694	30.174	24.858	25.509	24.116	16.329	21.14	11.408	14.303		19.579
22.196	26.713	24.447	33.235	17.094	21.426	21.36	22.554	22.441	15.337		17.554
31.102	23.007	20.718	14.789	24.574	18.066	16.908	22.532	16.11	13.67		19.938
35.076	25.627	27.609	11.19	20.309	20.253	20.729	18.365	16.915	10.127		13.595
28.1	21.949	20.941	17.87	20.631	18.679	21.14	18.15	18.942	11.047		9.251
24.625	35.44	27.52	17.901	20.941	25.265	22.604	21.426	14.799	11.617		10.839
22.935	38.346	29.946	22.78	22.738	19.624	20.378	17.116	14.593	15.012		16.047
35.317	26.165	28.255	20.718	17.96	18.625	17.438	15.752	18.226	8.788		12.58
36.06	25.24	22.935	18.853	19.65	21.068	14.67	19.128	13.093	8.613		20.128
33.636	37.305	24.503	20.824	22.844	19.727	22.232	18.454	22.441	14.241		12.098
31.207	24.256	20.824	21.149	20.655	24.289	23.456	17.175	17.116	14.731		9.251
27.119	30.174	27.28	21.495	23.655	21.847	22.733	18.226	24.574	12.829		14.731
29.946	33.927	21.597	30.399	20.128	25.996	20.039	12.58	17.576	12.62		10.674
33.144	35.617	19.452	30.855	16.11	25.385	15.279	12.986	18.672	14.808		14.627
32.646	30.101	23.95	26.917	26.588	23.687	18.679	14.241	11.704	21.939		19.682
30.89	37.568	23.489	27.904	23.413	22.054	19.128	19.54	15.793	22.345		14.241
31.207	34.312	28.801	19.012	21.408	25.465	20.434	11.704	11.779	12.58		14.409
28.409	25.12	19.41	17.885	23.735	30.413	16.506	16.915	18.645	21.026		16.666
34.763	25.315	24.143	25.142	24.158	18.787	20.704	14.17	12.458	24.947		14.902
32.57	29.281	28.877	27.129	20.434	26.171	21.426	13.122	13.954	17.109		14.601
32.838	28.849	25.098	23.536	23.408	19.417	20.039	15.104	16.11	17.027		18.233
30.489	27.45	20.453	22.828	22.283	22.419	19.631	16.429	15.079	18.003		12.73
22.159	21.986	16.285	27.21	18.289	24.346	17.869	20.489	18.625	16.795		12.171
28.158	25.022	22.78	28.801	22.599	27.34	13.549	19.734	10.674	22.733		24.947
32.105	27.4	23.489	22.923	28.057	26.098	15.656	12.986	20.039	14.902		13.502
37.487	31.994	29.846	25.498	27.275	25.205	21.23	17.576	17.525	14.627		15.213
36.415	26.795	23.893	23.536	24.983	25.707	13.502	15.096	14.593	19.358		13.208
41.311	30.57	31.207	29.356	25.717	28.686	15.912	16.552	17.726	22.705		13.539
34.881	28.849	24.858	24.802	32.396	16.795	14.089	13.323	17.554	25.305		13.845
28.409	31.831	25.315	23.161	27.749	19.573	18.672	20.637	19.161	12.858		15.672
26.05	22.539	27.757	27.718	23.196	21.922	18.861	18.948	8.569	14.868		21.026
33.045	38.346	31.443	25.53	23.714	17.783	18.178	20.128	15.171	16.506		14.303
29.169	21.899	25.797	28.763	21.69	30.032	16.878	17.982	24.158	20.526		13.208
32.846	29.3	22.84	20.824	24.861	23.921	18.178	14.232	17.554	19.599		12.118
24.447	32.283	27.51	25.412	22.888	25.658	21.783	17.576	12.118	17.918		12.087
45.259	21.445	25.272	23.813	17.847	23.783	19.443	18.461	15.607	17.554		12.59
32.241	30.489	25.541	28.801	20.532	23.456	15.362	11.082	19.26	18.017		19.128
25.53	38.009	17.024	18.619	25.24	21.122	20.14	13.399	13.881	18.861		22.441
21.495	37.305	14.881	19.648	22.054	23.087	22.441	13.208	12.181	12.098		15.984
24.945	24.143	25.24	28.342	25.996	19.65	22.054	17.619	10.804	12.448		20.655
29.616	26.713	28.109	26.917	22.733	20.532	17.438	20.784	18.948	23.863		16.429
29.103	32.436	25.881	21.559		21.164	14.098	16.659	13.427	14.799
28.061	29.919	26.795	20.824		16.11	12.499	15.403	16.015	23.751
38.395	35.502	31.831	28.924		18.645	21.188	17.116	13.881	18.316
28.158	22.356	23.489	26.144		25.864	21.608	16.506	13.688	23.196
23.208	25.294	30.327	29.449		24.538	17.116	13.623	12.077	13.549
23.22	40.347	24.492	13.575		15.304	21.661	14.232	16.383	14.627
26.795	36.083	31.338	19.731		20.241	12.829	15.129	18.679	18.233
18.853	26.662	27.904	25.142		18.038	14.601	15.992	16.227	21.23
30.57	28.061	23.489	19.354		27.749	16.757	18.143	20.09	24.429
24.053	35.068	22.526	31.137		22.783	24.2	17.226	15.801	18.185
28.544	33.481	26.134	33.07		22.755	17.612	17.086	20.039	17.833
23.813	27.36	30.57	22.828		26.166	16.483	16.613	15.213	26.745
22.828	31.754	27.15	24.858		24.703	15.984	16.817	17.314	14.859
29.597	28.763	22.526	32.545		29.658	13.734	15.337	13.054	9.251
25.412	36.602	25.098	28.158		21.777	13.734	7.327	15.096	15.104
33.862	39.463	26.425	25.754		21.236	12.284	13.67	13.502	14.089
27.19	34.024	27.953	34.951		21.236	17.869	14.627	11.584	23.655
26.008	35.771	29.579	16.419		21.847	19.938	17.64	18.672	17.109
20.546	46.026	32.469	19.083		19.785	18.645	14.514	13.294	17.576
26.259	20.718	29.141	17.072		25.628	18.185	19.266	14.696	22.054
20.559	29.919	32.037	15.877		20.153	13.122	18.122	13.502	27.237
23.536	37.568	29.946	26.259		24.289	15.72	23.868	14.67	19.849
20.02	33.725	33.798	26.144		19.599	18.143	16.243	15.992	19.358
33.415	31.857	24.143	29		20.532	19.54	16.552	10.026	16.173
19.24	30.89	26.228	20.453		26.645	13.817	21.847	20.875	22.163
27.688	30.969	31.172	19.979		28.897	23.714	16.11	18.625	19.599
24.858	25.153	25.892	22.84		22.419	20.996	18.861	14.593	18.178
25.12	35.06	28.342	17.778		24.615	16.259	9.718	24.983	13.064
28.061	33.235	28.924	21.761		25.717	16.915	18.066	18.915	14.098
23.349	29.468	24.802	21.188		21.349	15.104	15.362	17.726	17.175
					20.039			4.639
					25.16			15.793
					23.494			14.593
					20.489			15.096
					22.816			11.617
					20.655			17.175
					21.23			16.552
					24.116			16.204
					25.445			13.502
					26.971			16.727
F. Intensity of krt4::EGFP-CAAX in embryos and explants
Time	Normalized Intensity
	Embryo								Explant
0	14.5358	12.2443	15.9016	16.3227	11.5355	11.9104	13.2034		9.66106	13.2481	10.1031	9.68378	10.8103	13.037	9.91107	10.6624
15	13.7284	12.2416	18.6349	17.4525	12.1703	21.5285	15.1958		15.6112	16.0876	12.7182	7.04051	10.9007	8.85376	10.6325	10.2599
30	16.2996	13.4214	20.9064	14.564	14.8133	18.3134	16.4498		19.7241	17.6487	11.9466	7.48378	11.1829	8.88832	10.405	11.4734
45	16.2486	14.3741	20.9163	19.9048	18.9649	21.37	18.8828		19.3148	19.5045	12.9575	17.8142	11.5901	13.6545	10.0376	12.0968
60	16.6603	16.7087	20.5836	21.8947	18.4352	28.2492	21.8841		19.4297	14.4347	13.6113	17.6416	11.5291	12.5859	9.93051	11.3176
75	21.8449	18.1066	22.5287	25.0695	19.6716	29.6883	24.2752		33.4962	17.4552	14.777	19.8855	11.1847	14.3934	10.2502	14.4471
90	25.0173	18.2901	24.0246	25.9268	20.0675	37.7887	24.2982		29.0476	20.3067	14.6919	22	11.6617	14.5429	10.5058	10.3877
105	22.1401	21.1895	29.3872	30.7793	25.6222	33.0949	25.2489		21.7738	24.3338	16.9097	24.7469	12.237	16.9467	11.2349	15.4608
120	30.7355	21.7702	26.8464	34.725	25.3333	43.838	28.6039		30.1814	30.5223	24.7768	24.7834	11.7767	20.522	12.5596	16.1854
135	26.224	27.6998	32.0228	31.3905	24.4047	37.6019	32.987		29.7022	33.8782	19.7255	25.6707	14.8455	25.3267	16.7145	18.4436
150	31.6378	25.3405	35.7778	33.6691	25.9324	45.2224	34.4227		29.9944			27.833	14.7688	27.7787	20.3935	22.8165
H. Percentage of bud stage blastoderm explants expressing marker genes
					in %
	Present	Absent	Total		Present	Absent	Total
six3	20	6	26		76.9231	23.0769	100
gata2	32	1	33		96.9697	3.0303	100
tbx6	17	5	22		77.2727	22.7273	100
papc	40	15	55		72.7273	27.2727	100
flh	17	4	21		80.9524	19.0476	100
ntl	43	5	48		89.5833	10.4167	100
MyoD	7	13	20		35	65	100
sox32	13	5	18		72.2222	27.7778	100
gsc	24	34	58		41.3793	58.6207	100
hgg	22	27	49		44.898	55.102	100
I. Normalized expression along the back-tip axis
Norm. position	In situ marker
	tbx6																																									AVG	SD
0.1	0	0	0	0	0	0	0	0	0	0	0	0	0	0	0	0	0																									0	0
0.2	0	0	0	0	0	0	0	0	0	0	0	0	0	0	0	0	0																									0	0
0.3	0	0	0	0	0	0	0	0	0	0	0	0	0	0	0	0	0																									0	0
0.4	0	0	0	0	0	0	0	0	0	0	0	0	0	0	0	0	0																									0	0
0.5	0	0	0	0	0	0	0	0	0	0	0	0	0	0	0	0	0																									0	0
0.6	0	0	0	0	0	0	0	0	0	0	0	0	0	0	0	0	0																									0	0
0.7	0	1	0	0	0	0	0	0	1	0	0	0	0	1	1	0	0																									0.235294	0.437237
0.8	0	1	1	1	1	1	1	1	1	1	0	1	1	1	1	1	1																									0.882353	0.332106
0.9	1	1	1	1	1	1	1	1	1	1	1	1	1	1	1	1	1																									1	0
1	1	0	1	1	0	1	1	0	1	1	1	1	0	1	0	1	0																									0.647059	0.492592
	flh
0.1	0	0	0	0	0	0	0	0	0	0	0	0	0	0	0	0	0
0.2	0	0	0	0	0	0	0	0	0	0	0	0	0	0	0	0	0
0.3	0	0	0	0	0	0	0	0	0	0	0	0	0	0	0	0	0
0.4	0	0	0	0	0	0	0	0	0	0	0	0	0	0	0	0	0
0.5	0	0	0	0	0	0	0	0	0	0	0	0	0	0	0	0	0
0.6	0	1	0	0	0	0	0	0	1	0	0	0	0	0	0	0	0
0.7	0	1	0	0	0	1	0	1	1	1	1	0	0	0	0	0	0
0.8	0	1	0	0	1	1	0	1	1	1	1	0	1	0	1	1	1
0.9	1	1	1	1	1	1	1	1	0	1	1	1	1	1	1	1	1
1	1	0	1	1	1	0	1	1	0	0	1	1	1	1	0	1	1
	MyoD
0.1	0	0	0	0	0	0	0
0.2	0	0	0	0	0	0	0
0.3	0	0	0	0	0	0	0
0.4	0	0	0	0	0	0	0
0.5	0	0	0	0	0	0	0
0.6	0	0	0	0	0	0	0
0.7	0	0	1	0	0	0	0
0.8	1	1	1	1	1	1	1
0.9	1	1	1	1	1	1	1
1	1	1	0	1	1	1	1
	gsc
0.1	0	0	0	0	0	0	0	0	0	0	0	0	0	0	0	0	0	0	0	0	0	0
0.2	0	0	1	0	0	1	0	1	0	0	0	1	0	0	0	0	0	0	1	1	0	1
0.3	0	0	1	0	0	1	0	1	0	0	0	1	0	0	0	0	1	1	1	1	1	1
0.4	0	0	1	0	0	1	0	0	0	0	0	0	0	1	0	1	1	0	1	0	1	0
0.5	0	0	0	0	0	0	0	0	0	0	0	0	1	1	1	1	0	0	0	0	0	0
0.6	0	1	0	0	1	0	0	0	0	0	0	0	1	0	1	0	0	0	0	0	0	0
0.7	0	1	0	0	1	0	1	0	0	0	0	0	0	0	1	0	0	0	0	0	0	0
0.8	1	0	0	0	1	0	1	0	0	0	0	0	0	0	0	0	0	0	0	0	0	0
0.9	1	0	0	1	0	0	0	0	1	1	1	0	0	0	0	0	0	0	0	0	0	0
1	1	0	0	1	0	0	0	0	1	1	1	0	0	0	0	0	0	0	0	0	0	0
J. sox32 expression
								in %
	Cell cluster only	Cell cluster + individual cells	Individual cells only	Absent				Cell cluster only	Cell cluster + individual cells	Individual cells only	Absent
sox32	4	1	9	4				22.2222	5.55556	50	22.2222
