# Supplementary material for: Zebrafish embryonic explants undergo genetically encoded self-assembly
Source: eLife. 2020 Apr 6;9:e55190. doi: 10.7554/eLife.55190 (PMC7190352; doi:10.7554/eLife.55190)
Supplement: Figure 1—figure supplement 2—source data 1. [file elife-55190-fig1-figsupp2-data1.xlsx]

## Sheet: Sheet1
Figure 1 - Supplement 2
B. Extended or Not-extended
					in %
	Extended	Not-extended	Total		Extended	Not-extended	Total
64c	20	8	28		71.4286	28.5714	100
128c	32	2	34		94.1176	5.88235	100
256c	32	7	39		82.0513	17.9487	100
High	12	5	17		70.5882	29.4118	100
C. Circularity
64c	128c	256c	High
0.909	0.934	0.854	0.965
0.944	0.973	0.886	0.925
0.845	0.736	0.803	0.896
0.928	0.955	0.891	0.915
0.938	0.856	0.951	0.908
0.968	0.863	0.895	0.836
0.909	0.798	0.897	0.852
0.851	0.861	0.925	0.953
0.888	0.741	0.818	0.757
0.904	0.78	0.94	0.873
0.967	0.845	0.919	0.804
0.974	0.781	0.979	0.969
0.855	0.78	0.884	0.972
0.883	0.912	0.903	0.921
0.822	0.968	0.884	0.943
0.899	0.87	0.853	0.857
0.826	0.861	0.823	0.915
0.983	0.972	0.773
0.818	0.898	0.752
0.84	0.808	0.944
0.975	0.979	0.841
0.876	0.858	0.939
0.941	0.872	0.845
0.931	0.885	0.801
0.86	0.876	0.98
0.841	0.872	0.928
0.791	0.774	0.975
0.978	0.799	0.889
	0.912	0.723
	0.87	0.721
	0.765	0.668
	0.905	0.735
	0.977	0.851
	0.984	0.975
		0.751
		0.887
		0.822
		0.844
		0.825
D. Normalized extension length (%)
64c	128c	256c	High
27.5845	43.9114	44.2841	31.557
22.8598	40.9261	35.0637	27.695
43.3295	34.9546	45.3233	35.1124
30.0227	40.3781	24.471	42.14
33.0915	35.9443	37.2691	43.5518
27.178	36.79	42.5663	35.5352
25.2011	38.7924	22.6824	23.2812
31.2946	22.0989	34.9377	36.4528
46.2132	36.5758	28.7805	19.4246
32.8741	33.1572	27.6959	17.7757
37.979	22.4144	31.6914	32.9792
21.0394	28.8054	30.6686	21.5859
26.1373	38.0747	38.0487
40.5873	45.7575	42.7386
31.8494	43.9527	42.2895
34.3965	40.3013	10.8316
30.1509	32.5443	36.6249
43.1293	31.6261	38.6391
13.7168	31.468	42.5717
16.1616	34.0021	38.2112
	31.6783	36.2197
	29.1468	33.2498
	44.584	22.9165
	33.2058	47.7034
	22.511	45.9108
	39.2596	50.7613
	33.9959	33.2894
	21.7739	13.3371
	35.871	18.395
	24.7121	37.4922
		38.7044
