# Supplementary material for: Zebrafish embryonic explants undergo genetically encoded self-assembly
Source: eLife. 2020 Apr 6;9:e55190. doi: 10.7554/eLife.55190 (PMC7190352; doi:10.7554/eLife.55190)
Supplement: Figure 1—figure supplement 4—source data 1. [file elife-55190-fig1-figsupp4-data1.xlsx]

## Sheet: Sheet1
Figure 1 - Supplement 4
B. Percentage of blastoderm explants showing normal, strongly reduced or no expression of YSL marker genes
						in %
	Present	Strongly reduced	Absent	Total		Present	Strongly reduced	Absent	Total
campsap1l1	1	10	18	29		3.44828	34.4828	62.069	100
gata6	4	5	20	29		13.7931	17.2414	68.9655	100
mxtx2	5	17	6	28		17.8571	60.7143	21.4286	100
slc40a1	0	1	25	26		0	3.84615	96.1538	100
slc26a1	0	2	36	38		0	5.26316	94.7368	100
