# Supplementary material for: Zebrafish embryonic explants undergo genetically encoded self-assembly
Source: eLife. 2020 Apr 6;9:e55190. doi: 10.7554/eLife.55190 (PMC7190352; doi:10.7554/eLife.55190)
Supplement: Figure 1—source data 1. [file elife-55190-fig1-data1.xlsx]

## Sheet: Sheet1
Figure 1
C. Explant circularity
Oblong	Dome	50% epiboly	Shield	70% epiboly	90% epiboly	Bud
0.967	0.976	0.962	0.965	0.939	0.948	0.813
0.973	0.977	0.975	0.953	0.964	0.964	0.866
0.974	0.975	0.968	0.961	0.944	0.911	0.776
0.971	0.972	0.969	0.951	0.953	0.941	0.804
0.968	0.979	0.97	0.964	0.935	0.887	0.856
0.971	0.98	0.955	0.962	0.955	0.918	0.885
0.965	0.981	0.965	0.953	0.947	0.925	0.893
0.959	0.978	0.97	0.957	0.95	0.868	0.849
0.978	0.983	0.969	0.959	0.957	0.88	0.849
0.983	0.974	0.969	0.955	0.955	0.97	0.777
0.976	0.976	0.97	0.935	0.922	0.968	0.971
0.989	0.973	0.962	0.961	0.939	0.974	0.789
0.984	0.957	0.977	0.953	0.929	0.978	0.852
0.987	0.972	0.975	0.966	0.941	0.886	0.845
0.984	0.972	0.965	0.955	0.926	0.895	0.856
0.986	0.971	0.968	0.951	0.959	0.917	0.859
0.978	0.983	0.971	0.924	0.953	0.924	0.897
0.983	0.975	0.977	0.926	0.948	0.869	0.754
0.986	0.984	0.969	0.95	0.971	0.967	0.967
0.965	0.985	0.975	0.946	0.931	0.978	0.819
0.98	0.98	0.982	0.936	0.917	0.885	0.825
0.974	0.973	0.984	0.949	0.946	0.983	0.917
0.98	0.981	0.972	0.963	0.978	0.978	0.897
0.978	0.987	0.973	0.968	0.948	0.931	0.845
0.968	0.98	0.974	0.963	0.975	0.923	0.98
0.983	0.981	0.977	0.932	0.948	0.963	0.871
0.978	0.979	0.97	0.938	0.97	0.973	0.852
0.982	0.976	0.98	0.963	0.958	0.86	0.789
0.973	0.974	0.98	0.947	0.934	0.965	0.893
0.977	0.977	0.981	0.979	0.965	0.908	0.861
0.98	0.982	0.971	0.94	0.945	0.946	0.844
0.985	0.972	0.979	0.954	0.969	0.887	0.682
0.984	0.98	0.979	0.941	0.871	0.913	0.917
0.982	0.968	0.981	0.962	0.967	0.959	0.834
0.975		0.976	0.934	0.977	0.924	0.927
0.983			0.966		0.927	0.981
0.979			0.967			0.855
0.988			0.921			0.956
0.987			0.934
0.98			0.963
0.981
0.986
E. Normalized expression along the back-tip axis
Norm. position	In situ marker
	gata 2																																									AVG	SD
0.1	1	1	1	1	1	1	1	1	1	1	1	1	1	1	1	1	1	1	1	1	1	1	1	1	1	1	1	1	1	1	1											1	0
0.2	1	1	1	1	1	1	1	1	1	1	1	1	1	1	1	1	1	1	1	1	1	1	1	1	1	1	1	1	1	1	1											1	0
0.3	1	1	1	1	1	1	1	1	1	1	1	1	1	1	1	1	1	1	1	1	1	1	1	1	1	1	1	1	1	1	1											1	0
0.4	1	1	1	1	1	0	1	1	1	1	1	1	1	1	1	1	1	1	1	1	1	1	1	1	1	1	1	1	1	1	1											0.967742	0.179605
0.5	1	0	1	1	1	0	1	1	1	1	1	1	1	1	1	1	1	1	1	1	1	1	1	1	1	1	1	1	1	1	1											0.935484	0.249731
0.6	1	0	1	0	0	0	1	0	1	0	0	1	0	1	1	0	1	0	1	1	1	0	0	1	0	1	0	0	1	1	1											0.516129	0.508001
0.7	1	0	1	0	0	0	0	0	0	0	0	1	0	1	0	0	1	0	1	1	0	0	0	0	0	0	0	0	1	1	0											0.290323	0.461414
0.8	0	0	1	0	0	0	0	0	0	0	0	0	0	1	0	0	0	0	1	1	0	0	0	0	0	0	0	0	1	1	0											0.193548	0.40161
0.9	0	0	1	0	0	0	0	0	0	0	0	0	0	1	0	0	0	0	1	1	0	0	0	0	0	0	0	0	0	0	0											0.129032	0.340777
1	0	0	1	0	0	0	0	0	0	0	0	0	0	1	0	0	0	0	1	1	0	0	0	0	0	0	0	0	0	0	0											0.129032	0.340777
	six 3																																									AVG	SD
0.1	0	0	0	0	0	0	0	0	1	0	0	0	0	0	0	0	1	0	0	0																						0.1	0.307794
0.2	0	1	0	0	0	0	0	0	1	1	1	0	0	1	0	1	1	1	0	1																						0.45	0.510418
0.3	1	1	1	1	1	0	0	1	1	1	1	0	0	1	1	1	1	1	1	1																						0.8	0.410391
0.4	1	1	1	1	1	1	0	1	0	1	1	1	1	1	1	1	1	1	1	1																						0.9	0.307794
0.5	1	0	0	1	1	1	1	0	0	0	1	1	1	0	1	0	0	1	1	1																						0.6	0.502625
0.6	0	0	0	0	0	1	1	0	0	0	1	0	0	0	0	0	0	1	1	0																						0.25	0.444262
0.7	0	0	0	0	1	0	1	0	0	0	0	0	0	0	0	0	0	1	1	0																						0.2	0.410391
0.8	0	0	0	0	1	0	1	0	0	0	0	0	0	0	0	0	0	0	0	0																						0.1	0.307794
0.9	1	1	0	1	1	0	0	0	0	0	0	0	0	0	0	0	0	0	1	0																						0.25	0.444262
1	1	1	1	0	0	0	0	0	0	0	0	0	0	0	0	0	0	0	1	0																						0.2	0.410391
	hgg																																									AVG	SD
0.1	0	0	0	0	0	0	0	0	0	0	0	0	0	0	0	0	0	0	0	0																						0	0
0.2	0	0	0	0	0	1	0	0	0	0	0	0	0	0	0	0	0	0	0	0																						0.05	0.223607
0.3	0	0	0	0	0	1	0	0	0	1	0	0	0	0	0	0	0	0	0	0																						0.1	0.307794
0.4	0	0	0	0	1	0	0	0	0	1	0	0	0	0	1	0	0	0	0	0																						0.15	0.366348
0.5	0	0	1	1	1	0	0	0	0	1	0	0	0	0	1	0	0	0	0	0																						0.25	0.444262
0.6	1	0	1	1	1	0	0	1	0	1	0	0	0	0	1	0	0	0	0	0																						0.35	0.48936
0.7	1	1	0	0	1	0	1	1	1	0	0	0	0	0	0	0	0	0	0	0																						0.3	0.470162
0.8	0	1	0	0	0	0	1	0	0	0	1	1	1	0	0	0	0	1	0	0																						0.3	0.470162
0.9	0	0	0	0	0	0	0	0	0	0	1	1	1	0	0	1	0	1	1	1																						0.35	0.48936
1	0	0	0	0	0	0	0	0	0	0	1	0	1	1	0	1	1	0	1	1																						0.35	0.48936
	ntl																																									AVG	SD
0.1	0	0	0	0	0	0	0	0	0	0	0	0	0	0	0	0	0	0	0	0	0	0	0	0	0	0	0	0	0	0	0	0	0	0	0	0	0	0	0	0	0	0	0
0.2	0	0	0	0	0	0	0	0	0	0	0	0	0	0	0	0	0	0	0	0	0	0	0	0	0	0	0	0	0	0	0	0	0	0	0	0	0	0	0	0	0	0	0
0.3	0	0	0	0	0	0	0	0	0	0	0	0	0	0	0	0	0	0	0	0	0	0	0	0	0	0	0	0	0	0	0	0	0	0	0	0	0	0	0	0	0	0	0
0.4	0	0	0	0	0	0	0	0	0	0	0	0	0	0	0	0	0	0	0	0	0	0	0	0	0	0	0	0	0	0	0	0	0	0	0	0	0	0	0	0	0	0	0
0.5	0	0	0	0	0	0	0	0	0	0	0	0	0	0	0	0	0	0	0	0	0	0	0	0	0	0	0	0	0	0	0	0	0	0	0	0	0	0	0	0	0	0	0
0.6	0	0	0	0	0	0	0	0	0	0	0	1	0	0	0	0	0	0	0	0	0	0	0	0	0	0	0	0	0	0	0	0	0	1	0	0	0	0	0	0	0	0.0487805	0.218085
0.7	0	1	0	1	0	1	0	1	1	0	0	1	0	0	1	1	1	1	0	0	0	0	0	1	0	1	1	1	1	1	0	1	1	1	1	1	0	0	1	0	0	0.536585	0.504854
0.8	1	1	1	1	0	1	1	1	1	0	1	1	0	0	1	1	1	1	1	1	1	0	1	1	1	1	1	1	1	1	1	1	1	1	1	1	1	1	1	1	0	0.853659	0.357839
0.9	1	1	1	1	1	1	1	1	1	1	1	1	1	1	1	1	1	1	1	1	1	1	1	1	1	1	1	1	1	1	1	1	1	1	1	1	1	1	1	1	1	1	0
1	1	1	1	1	1	1	1	1	1	1	1	1	1	1	1	1	1	1	1	1	1	1	1	1	1	1	1	1	1	1	1	1	1	1	1	1	1	1	1	1	1	1	0
	papc																																									AVG	SD
0.1	0	0	0	0	0	0	0	0	0	0	0	0	0	0	0	0	0	0	0	0	0	0	0	0	0	0	0	0	0	0	0	0	0	0	0	0	0					0	0
0.2	0	0	0	0	0	0	0	0	0	0	0	0	0	0	0	0	0	0	0	0	0	0	0	0	0	0	0	0	0	0	0	0	0	0	0	0	0					0	0
0.3	0	0	0	0	0	0	0	0	0	0	0	0	0	0	0	0	0	0	0	0	0	0	0	0	0	0	0	0	0	0	0	0	0	0	0	0	0					0	0
0.4	0	0	0	0	0	0	0	0	0	0	0	0	0	0	0	0	0	0	0	0	0	0	0	0	0	0	0	0	0	0	0	0	0	0	0	0	0					0	0
0.5	0	0	0	0	0	0	0	1	0	0	0	0	0	0	0	0	0	0	0	0	0	0	0	0	0	0	0	0	0	0	0	0	0	0	0	0	0					0.027027	0.164399
0.6	0	0	0	0	0	0	0	1	0	0	0	0	0	0	0	0	0	0	0	0	0	0	0	0	0	0	1	0	0	0	0	0	0	0	0	0	0					0.0540541	0.229243
0.7	1	0	0	1	0	1	1	1	1	1	1	0	1	1	1	0	0	1	0	1	1	1	1	1	1	1	1	0	1	1	0	0	1	0	0	0	0					0.621622	0.491672
0.8	1	1	0	1	1	1	1	1	1	1	1	1	1	1	1	1	1	1	1	1	1	1	1	1	1	1	1	1	1	1	1	1	1	1	0	1	0					0.918919	0.276725
0.9	1	1	1	1	1	1	1	1	1	1	1	1	1	1	1	1	1	1	1	1	1	1	1	1	1	1	1	1	1	1	1	1	1	1	0	1	0					0.945946	0.229243
1	1	0	1	1	1	1	1	1	1	0	1	1	1	1	0	0	0	1	1	1	1	0	0	1	1	1	0	1	1	0	1	1	1	1	1	1	1					0.756757	0.434959
