# Supplementary material for: Zebrafish embryonic explants undergo genetically encoded self-assembly
Source: eLife. 2020 Apr 6;9:e55190. doi: 10.7554/eLife.55190 (PMC7190352; doi:10.7554/eLife.55190)
Supplement: Figure 2—figure supplement 1—source data 1. [file elife-55190-fig2-figsupp1-data1.xlsx]

## Sheet: Sheet1
Figure 2 - Supplement 1
E-J. Normalized intensity of pSMAD2/3 positive nuclei vs. Cell tier from the YSL/wounding site
50% epiboly																																			Germ Ring
Embryo														Explant																					Embryo
Cell tier	Norm. intensity	Cell tier	Norm. intensity	Cell tier	Norm. intensity	Cell tier	Norm. intensity	Cell tier	Norm. intensity	Cell tier	Norm. intensity	Cell tier	Norm. intensity	Cell tier	Norm. intensity	Cell tier	Norm. intensity	Cell tier	Norm. intensity	Cell tier	Norm. intensity	Cell tier	Norm. intensity	Cell tier	Norm. intensity	Cell tier	Norm. intensity	Cell tier	Norm. intensity	Cell tier	Norm. intensity	Cell tier	Norm. intensity		Cell tier	Norm. intensity	Cell tier	Norm. intensity	Cell tier	Norm. intensity	Cell tier	Norm. intensity	Cell tier	Norm. intensity	Cell tier	Norm. intensity	Cell tier	Norm. intensity	Cell tier
5.82942	0.507251	5.95048	0.793473	21.947	1.44987	11.6125	2.14923	7.71591	0.891012	19.4541	1.06158	16.1508	1.65166	111.378	0.472316	127.152	0.883487	56.739	0.545628	49.7014	0.585029	44.5769	0.673972	37.048	1.28144	55.0806	0.179055	52.4569	0.670787	31.3891	0.633346	5.63686	0.375281		33.1289	1.09893	21.414	2.00167	17.1843	0.791951	49.3503	0.832971	8.61446	1.32107	26.1462	0.590206	15.3951	1.16926	5.65519
22.1138	0.475908	19.2268	0.793032	7.86928	1.28255	16.624	1.95993	7.92519	0.827031	32.1645	0.919382	36.3866	1.45957	45.6556	0.402489	110.871	0.843565	126.533	0.499263	44.7943	0.534444	35.3012	0.543508	10.0028	1.19664	65.4541	0.166121	39.0022	0.474076	22.9827	0.59196	102.547	0.186045		19.0838	0.958383	36.1798	1.10904	26.073	0.791336	126.549	0.781492	11.1577	1.22585	5.60608	0.580237	16.0898	1.07362	35.2942
19.2356	0.450759	19.8144	0.779265	14.0043	1.22481	9.96214	1.72967	0	0.726884	24.3164	0.861779	15.3723	1.37174	111.007	0.358884	91.6968	0.774354	96.4686	0.483446	57.6666	0.517445	62.4434	0.516419	65.1635	0.922719	9.14376	0.163318	40.8821	0.471178	33.1824	0.55489	56.6506	0.174743		25.2211	0.865159	25.9039	1.03547	6.40795	0.727867	28.2972	0.77631	15.2323	1.07996	10.9397	0.559555	24.993	1.03384	27.09
22.1693	0.443075	13.5512	0.772304	15.7589	1.21554	4.42281	1.68945	5.15657	0.725018	27.1952	0.847796	33.3503	1.33165	50.7476	0.358264	114.683	0.646431	41.7775	0.389248	0	0.498117	78.3374	0.452822	4.62454	0.8878	55.6147	0.159045	33.9951	0.438557	41.2551	0.539898	43.1237	0.172573		6.7047	0.861073	33.7719	0.87786	0	0.726436	90.2915	0.752883	14.902	1.05423	28.9808	0.506893	19.7514	0.963184	36.8212
5.11664	0.37847	24.7222	0.770321	11.5604	1.15599	15.2085	1.62629	14.8701	0.714031	25.0678	0.832952	28.3257	1.26978	47.5211	0.349149	105.127	0.639064	70.9692	0.385951	55.0982	0.480576	4.63681	0.328384	54.2142	0.786167	73.9888	0.158385	59.6549	0.405763	57.1037	0.501693	44.1804	0.171393		10.6014	0.838338	47.6514	0.768463	5.56188	0.691365	105.882	0.733256	0	1.01009	34.6096	0.503673	20.4125	0.961074	24.6725
31.5586	0.372778	6.97112	0.766987	9.42083	1.09263	14.6024	1.58975	12.5861	0.707569	25.7708	0.822118	15.8881	1.25691	31.6134	0.348175	128.401	0.553705	28.1344	0.359836	32.0285	0.467869	84.8546	0.327782	115.171	0.760082	24.112	0.158	37.2702	0.401555	65.3781	0.376631	89.0211	0.157409		4.02965	0.827263	17.0299	0.768382	9.38216	0.685676	27.5305	0.731291	14.3474	0.991137	7.59798	0.496805	19.7109	0.958907	12.7352
15.0953	0.372247	6.71121	0.766794	14.7792	1.0819	14.9229	1.49014	19.4195	0.70682	19.7165	0.816356	15.2667	1.22339	105.63	0.347965	126.037	0.518065	44.2636	0.347748	20.7396	0.466062	83.5446	0.324859	0.627606	0.727616	79.4613	0.156799	43.0715	0.383625	91.31	0.374478	37.541	0.153894		28.1498	0.804912	41.0076	0.732416	11.5416	0.558716	81.9883	0.724485	8.71212	0.963306	47.9526	0.48191	32.1328	0.946815	18.7668
8.03023	0.370038	20.6623	0.76605	8.85754	1.07371	12.9315	1.45231	15.3164	0.695418	28.1053	0.743877	10.422	1.1929	51.1945	0.335747	53.613	0.489178	31.6951	0.328167	75.5111	0.424739	81.4632	0.302488	92.4574	0.682656	99.5751	0.154765	41.9793	0.37421	65.1808	0.330003	64.7221	0.153781		22.9749	0.782381	24.0251	0.731784	18.7278	0.527435	34.11	0.722302	6.12813	0.951224	28.7876	0.462461	16.705	0.935453	16.3742
0.554861	0.369692	21.2616	0.764272	17.948	1.04802	11.6267	1.43439	10.4114	0.660075	29.8732	0.707193	7.36878	1.17089	91.6243	0.333434	91.8692	0.474515	14.5351	0.321512	67.675	0.389798	85.247	0.286216	108.153	0.594084	77.8146	0.151151	107.287	0.362943	66.959	0.313969	68.8225	0.137205		20.1181	0.777677	25.6338	0.725338	16.0537	0.517814	123.563	0.708098	4.02098	0.951023	6.54038	0.447938	30.7207	0.898543	20.8755
17.9911	0.361094	4.54392	0.763254	22.8754	1.04167	9.84487	1.42901	9.28667	0.631143	26.199	0.665363	18.658	1.16836	80.2563	0.326113	44.7923	0.450486	96.2148	0.31967	27.4543	0.381511	0	0.280309	32.5171	0.573485	69.4447	0.150629	28.4674	0.360267	67.4351	0.268656	73.8955	0.13581		13.6751	0.747685	17.0882	0.706455	40.9321	0.500271	25.8202	0.697827	27.686	0.93475	15.7788	0.445474	16.9241	0.896273	18.2679
18.3101	0.35734	25.2478	0.759075	7.16245	0.983224	6.38136	1.41474	11.4411	0.613118	35.5615	0.657599	22.9414	1.13848	91.1051	0.325555	51.2742	0.43878	71.6273	0.304884	21.6062	0.360622	83.2088	0.277594	96.1948	0.567716	22.1367	0.149097	68.1827	0.358592	108.531	0.266326	20.4908	0.134904		22.369	0.727572	24.0794	0.685964	22.0088	0.499674	17.0091	0.678536	10.7756	0.929778	31.6264	0.435309	33.6081	0.87511	11.1329
50.018	0.352729	24.4169	0.751553	14.7813	0.982715	8.76609	1.38692	18.5086	0.61253	37.3763	0.655529	21.9675	1.13534	26.8671	0.286463	44.9335	0.423471	7.832	0.287795	41.8788	0.351807	10.4339	0.275545	97.7356	0.519513	42.4446	0.148436	88.9864	0.353482	93.1579	0.259862	86.626	0.132588		16.4646	0.718191	27.2127	0.644409	20.7913	0.494823	37.3159	0.66957	16.0157	0.925748	15.7751	0.426546	11.6073	0.870227	36.3653
28.842	0.347383	5.92142	0.750012	17.969	0.977547	9.4898	1.29065	13.2715	0.610993	27.936	0.645713	18.2171	1.12428	115.906	0.271154	96.0052	0.419976	86.4908	0.286756	15.5572	0.337574	64.3176	0.268051	89.1801	0.473878	75.5735	0.144263	75.1526	0.353233	36.4327	0.258757	99.9738	0.131258		17.1059	0.706531	51.9325	0.641041	42.9027	0.490323	30.5104	0.668207	8.60371	0.905202	11.4217	0.426229	17.6822	0.869832	21.2285
15.2419	0.34341	15.6874	0.748527	13.771	0.933023	14.8358	1.22413	14.4993	0.60473	27.1875	0.631202	17.4332	1.11707	16.2005	0.258563	68.5394	0.400867	75.2957	0.277742	21.8525	0.331106	0.596215	0.262824	93.385	0.424195	25.7412	0.142492	28.5569	0.34827	65.9452	0.247558	62.3841	0.129396		46.0981	0.692939	31.0073	0.632676	29.8918	0.489338	78.1327	0.655675	20.5469	0.903185	20.2337	0.425255	22.5044	0.867026	55.1315
26.4936	0.342968	7.32662	0.746122	19.3937	0.928742	15.2388	1.21836	20.5718	0.601517	48.0631	0.620395	4.74871	1.09733	33.3728	0.252862	66.4824	0.394345	104.703	0.277553	50.195	0.322821	95.2665	0.255161	30.0237	0.408791	34.0994	0.142073	53.865	0.342344	71.2152	0.247506	88.0664	0.128145		17.311	0.675314	34.956	0.627527	10.1044	0.470164	102.597	0.619092	20.7617	0.871756	43.2992	0.419317	18.8091	0.865944	22.6816
5.51043	0.339775	30.6081	0.742616	24.8606	0.921439	12.4021	1.1855	5.20312	0.594452	34.3829	0.584823	35.0576	1.09128	66.5649	0.24499	123.799	0.392255	7.57987	0.258786	84.1996	0.299649	103.465	0.252492	11.3779	0.394783	78.7105	0.139902	29.0089	0.323731	17.7543	0.231454	114.748	0.125553		43.8526	0.646865	31.3084	0.627006	19.534	0.464313	101.504	0.617436	18.94	0.858968	22.5648	0.41928	28.648	0.864517	15.0678
12.1456	0.339686	14.0495	0.742269	9.82103	0.915241	25.6092	1.16194	11.7346	0.586848	25.7933	0.582669	16.8464	1.08204	65.2632	0.244903	77.3118	0.389294	36.3974	0.256759	65.1751	0.295259	103.91	0.24753	39.2327	0.391884	35.939	0.137731	33.8089	0.321436	84.0427	0.230279	62.6627	0.124455		28.4973	0.64522	34.1042	0.600822	43.8286	0.459891	65.8948	0.600247	8.95655	0.851279	11.4392	0.418209	14.3471	0.855902	26.0702
19.1835	0.326284	7.2042	0.739836	15.9276	0.901105	5.32482	1.16193	15.3974	0.585254	30.7497	0.579381	29.5236	1.05917	68.4595	0.244469	109.617	0.386607	11.5245	0.256032	124.811	0.292151	82.5304	0.24498	89.3045	0.379113	101.284	0.137409	61.7746	0.320976	0	0.229331	87.4594	0.118968		7.73594	0.630058	19.8085	0.596102	14.1586	0.443094	143.7	0.59739	32.8971	0.841441	11.1781	0.416644	38.1472	0.855778	11.9384
32.9515	0.319621	34.8867	0.736446	14.8808	0.897342	7.72604	1.12792	10.9067	0.584808	30.1959	0.557431	13.9756	1.05627	122.478	0.24354	92.2929	0.372795	97.6621	0.255671	116.95	0.281374	52.3219	0.242005	66.6728	0.371181	101.884	0.133231	43.1202	0.319835	71.136	0.225592	96.9152	0.117317		15.5225	0.572949	38.8086	0.585829	18.7681	0.440813	14.045	0.593138	24.1288	0.84125	12.8525	0.415597	28.0476	0.850831	10.1726
12.44	0.318797	3.59922	0.735854	16.0374	0.895508	31.103	1.11891	12.3455	0.57783	32.9139	0.556529	23.6833	1.04539	68.5903	0.243502	116.369	0.370884	42.8689	0.254515	68.7666	0.272228	96.8072	0.23646	114.402	0.36976	30.3298	0.132493	46.8514	0.318776	105.895	0.206402	122.128	0.116099		19.6103	0.569266	15.9241	0.580987	46.2588	0.428281	57.8943	0.582865	21.7668	0.831074	36.5085	0.410753	21.8378	0.845734	27.5725
7.97541	0.314518	12.3177	0.733566	9.3756	0.880263	8.55774	1.07968	14.0004	0.576834	32.3458	0.530433	21.3138	1.0438	86.3049	0.232974	64.207	0.36497	56.6031	0.241883	42.8654	0.269365	9.87252	0.22612	33.068	0.365695	67.7935	0.131825	63.0932	0.317678	52.9673	0.205024	112.75	0.112565		11.4358	0.565324	49.9129	0.572351	29.6706	0.420689	53.7044	0.573354	13.7915	0.8256	5.88298	0.408741	22.7566	0.845588	56.3056
43.2561	0.309334	33.2946	0.7331	30.2403	0.874567	7.65835	1.06676	12.0408	0.575597	39.4259	0.515165	40.2601	1.03487	120.649	0.231498	90.2685	0.340095	38.788	0.238375	48.4262	0.268286	39.1992	0.220146	60.1201	0.358756	103.347	0.131382	17.091	0.312344	36.0746	0.20205	32.4365	0.107385		24.3519	0.564752	32.5162	0.553301	28.2058	0.419957	67.7158	0.56884	11.4535	0.821286	33.3052	0.408712	19.4586	0.842986	52.1337
39.2961	0.30481	35.8784	0.730696	30.6298	0.873484	5.00233	1.06069	17.7591	0.56695	28.4717	0.502342	14.764	1.03306	86.8152	0.229476	89.4212	0.332391	17.3974	0.230177	134.285	0.265342	96.6526	0.210864	66.0651	0.336908	63.6963	0.128007	27.6237	0.305657	46.4459	0.200225	90.5257	0.105732		13.0255	0.564681	31.8534	0.552656	28.907	0.419281	52.8226	0.556065	6.93331	0.814739	33.8451	0.408412	24.5664	0.803646	18.313
48.3829	0.303411	13.1305	0.729943	21.9409	0.871016	6.4062	1.05499	16.8407	0.56532	10.5462	0.499277	33.8488	1.03269	59.1111	0.219845	46.0986	0.31229	29.4992	0.227073	86.7698	0.25971	94.5041	0.206442	104.697	0.333291	40.1297	0.126588	104.573	0.304612	61.6251	0.199352	74.9178	0.104472		12.8652	0.551322	43.8907	0.550821	37.0028	0.412711	101.556	0.548269	18.7459	0.813067	36.0864	0.407859	39.7123	0.800217	7.65214
54.5391	0.303259	0	0.728291	16.5384	0.864706	7.95964	1.04999	21.7146	0.552393	43.7866	0.492562	26.59	1.03069	106.022	0.214353	85.1239	0.284843	89.555	0.22537	70.1509	0.247097	79.6873	0.201643	78.9516	0.315679	43.599	0.125692	86.0513	0.302073	74.4398	0.198171	63.8777	0.102506		26.912	0.550161	28.0602	0.550117	21.4106	0.40987	45.033	0.532343	16.1957	0.753352	0	0.404895	31.4438	0.797157	11.2476
20.376	0.297936	7.48583	0.727781	12.8463	0.849224	18.7082	1.01904	14.5615	0.551751	33.686	0.489896	5.62903	1.02492	61.6123	0.210306	101.384	0.277287	22.5124	0.224678	27.711	0.245596	10.4761	0.200734	31.5083	0.287798	45.7435	0.125658	81.9765	0.299612	54.0423	0.196372	62.2969	0.101104		35.5956	0.550057	20.0476	0.549324	32.456	0.391633	52.0725	0.531582	16.1372	0.733343	36.0293	0.404444	34.4641	0.790227	39.5436
3.09095	0.294516	22.0054	0.720671	7.03807	0.832506	5.80716	1.00972	14.0163	0.540115	39.9245	0.485831	33.1827	1.0191	90.8916	0.208566	132.379	0.264468	14.0195	0.223987	98.7831	0.23633	70.2539	0.19395	51.2084	0.287298	89.3533	0.125466	8.40153	0.297305	56.059	0.195621				45.4241	0.531083	49.1187	0.545988	35.9819	0.387698	13.247	0.514185	30.2294	0.727564	19.3443	0.404214	18.6747	0.787798	35.373
7.87527	0.29421	18.5389	0.719615	21.7301	0.83017	17.3291	1.00802	12.4888	0.538726	42.3171	0.481467	8.6413	1.00817	35.6099	0.207157	96.939	0.25698	30.263	0.219082	102.865	0.234039	25.7246	0.189028	94.1387	0.286371	36.6455	0.1244	76.4314	0.297176	96.8677	0.192885				2.46529	0.525586	18.6587	0.545098	68.9911	0.386056	76.0365	0.510988	11.3552	0.72133	54.0278	0.400117	33.4056	0.784023	23.7271
24.3034	0.293358	0.949334	0.716683	45.3308	0.824062	12.4956	0.993053	19.5564	0.535487	32.3118	0.472627	5.85272	0.999566	97.8786	0.205456	31.3438	0.252358	57.3963	0.213783	72.587	0.23081	7.74743	0.188649	108.958	0.273998	84.7257	0.124266	55.524	0.29434	70.0153	0.19195				25.3773	0.524062	23.9847	0.541578	33.071	0.385314	120.128	0.510935	15.4959	0.71381	10.5641	0.396935	35.8218	0.765726	14.7589
5.72871	0.291055	22.8665	0.715515	2.37764	0.805561	4.17291	0.981004	24.811	0.527761	39.5614	0.468919	31.5711	0.997499	46.0674	0.202479	65.1051	0.237736	41.4192	0.208361	76.2954	0.221456	77.0653	0.182952	77.1788	0.270923	13.7318	0.123455	1.10787	0.292223	61.8227	0.189924				9.89608	0.519534	22.2517	0.541023	34.7858	0.379028	59.441	0.509766	17.8269	0.711261	30.3628	0.394246	30.6165	0.764965	48.6878
1.66635	0.289573	11.3124	0.715482	31.7241	0.795429	13.1757	0.955193	22.0538	0.526759	29.0041	0.464506	10.1634	0.985054	37.4737	0.202011	103.596	0.230302	47.3005	0.194658	101.979	0.221248	56.4676	0.178513	43.5772	0.262313	11.17	0.12333	31.4825	0.290274	29.2585	0.187402				40.3423	0.518421	25.9644	0.540985	70.4948	0.372964	110.572	0.49794	25.7609	0.701894	17.4185	0.393339	27.3417	0.741736	36.4023
28.2107	0.285751	43.6377	0.711824	23.8362	0.788368	20.1579	0.954341	8.1451	0.526224	36.9951	0.462929	23.1567	0.978059	64.9511	0.199263	45.1416	0.223585	80.8881	0.193872	26.6108	0.219881	82.2236	0.175898	60.8505	0.260974	0.984807	0.122498	20.146	0.286938	110.693	0.179906				10.9177	0.499112	39.1286	0.537569	43.1153	0.370385	71.1073	0.493839	40.2047	0.697164	47.5144	0.39102	24.3228	0.732639	30.5384
8.79911	0.282503	9.37316	0.710059	10.7093	0.781823	26.1649	0.952581	7.64856	0.522939	42.7719	0.461506	46.5491	0.975254	87.0196	0.197743	81.4196	0.217825	48.5376	0.188118	82.9214	0.216972	28.3785	0.175873	0	0.247408	71.1711	0.121808	85.8943	0.276094	72.5088	0.176094				8.38215	0.496986	57.3711	0.536745	25.8774	0.369538	128.635	0.490076	29.2407	0.691037	30.4778	0.388831	23.4404	0.712334	45.94
17.5197	0.281162	45.0029	0.709927	33.9379	0.758764	11.4065	0.9296	26.5523	0.509493	30.3869	0.457183	36.1454	0.974247	45.5593	0.196635	117.134	0.203188	79.4664	0.188034	95.1086	0.213851	18.0884	0.175569	108.218	0.238458	102.712	0.120471	70.2288	0.272796	87.2078	0.17036				34.5773	0.496096	24.2471	0.536627	57.1627	0.369022	79.335	0.486165	20.8666	0.690393	45.808	0.38533	22.0693	0.703343	26.1184
39.4051	0.280031	10.4275	0.705101	16.0622	0.751879	6.37545	0.929598	25.2378	0.50391	39.3492	0.44772	25.5482	0.966387	44.5069	0.185833	52.3196	0.200919	82.856	0.175432	132.336	0.212864	30.2972	0.170392	27.9178	0.224379	21.4011	0.119423	62.7739	0.264755	71.7933	0.160436				6.68517	0.494298	60.3118	0.53595	10.9453	0.364824	88.7224	0.477917	31.3979	0.684283	32.7475	0.384458	26.1359	0.702575	65.2244
26.5424	0.274164	8.73327	0.703582	24.0719	0.737736	22.2562	0.926982	25.3361	0.502769	47.7374	0.446847	14.5352	0.964952	96.1778	0.18184	47.7242	0.193557	114.388	0.170983	119.308	0.212276	111.18	0.168851	96.2818	0.224009	101.291	0.116634	107.942	0.26212	31.3491	0.157319				7.61922	0.488009	20.5545	0.518019	37.7265	0.363801	99.6983	0.477087	10.4254	0.679456	14.1843	0.382229	37.7099	0.692312	58.9229
26.0943	0.273852	18.558	0.702868	10.2462	0.732696	26.6063	0.924828	20.4146	0.497913	18.5808	0.445503	15.3088	0.964696	79.8805	0.180647	124.9	0.189902	104.043	0.17039	73.5034	0.208514	74.3298	0.167801	111.936	0.215896	38.3514	0.115926	41.5419	0.259845	66.2549	0.152362				54.5089	0.485334	24.707	0.518011	24.6826	0.36217	59.6081	0.469007	20.6739	0.678901	29.2499	0.378993	35.7624	0.683891	16.0757
31.3011	0.272149	5.28819	0.699574	6.57809	0.731247	14.113	0.914899	20.0654	0.490005	9.7203	0.440208	31.7193	0.960501	79.8176	0.178219	73.5159	0.185527	71.5408	0.166695	70.9564	0.205355	37.3255	0.16469	109.353	0.211881	61.2939	0.115668	36.5686	0.25277	109.361	0.147263				20.9907	0.482093	34.4776	0.514093	12.1495	0.361618	60.5378	0.452745	23.5161	0.678717	16.378	0.377819	18.7448	0.67818	36.0706
24.1891	0.271375	11.8437	0.698724	4.28514	0.728034	2.73974	0.876329	19.6856	0.484156	35.3885	0.43844	17.1624	0.957669	58.429	0.174375	5.24196	0.182703	89.3119	0.164069	64.3706	0.202195	88.1545	0.163899	77.4848	0.173827	80.9645	0.115397	15.4917	0.252264	103.317	0.137334				25.2392	0.478464	21.7844	0.512334	25.0231	0.360659	135.827	0.451549	17.4977	0.668081	42.4348	0.373756	26.524	0.670982	13.9717
77.3948	0.269682	14.9612	0.6967	8.60422	0.714788	18.393	0.870635	29.293	0.482979	39.7666	0.43398	15.6926	0.952257	121.442	0.173614	91.17	0.181164	93.0964	0.163922	6.18184	0.201548	2.24842	0.163732	94.7746	0.159381	94.7583	0.115243	44.0177	0.25058	96.4789	0.133612				39.5572	0.47455	68.9525	0.512213	1.24401	0.359694	56.0368	0.450512	9.94554	0.66574	8.43679	0.371513	21.9143	0.666114	40.9734
19.5219	0.269479	7.19977	0.695389	15.0414	0.70829	4.90625	0.865852	42.5715	0.481578	28.4919	0.420002	8.64777	0.936499	101.251	0.172246	53.9835	0.177018	84.8991	0.161543	70.9092	0.198022	5.63514	0.162686	79.0352	0.15927	23.0563	0.115027	62.5906	0.250411	23.3746	0.131962				18.1014	0.4745	13.8047	0.510367	42.3833	0.358089	87.4989	0.448441	26.0161	0.6615	12.3636	0.369875	32.6095	0.662736	63.2168
35.6786	0.266995	49.0252	0.69371	10.7609	0.700596	31.27	0.851347	22.6621	0.469118	38.4499	0.412165	19.791	0.934522	81.0754	0.168919	10.2756	0.175581	75.9988	0.159585	133.643	0.197381	38.9346	0.1592	53.0089	0.153373	63.6754	0.11481	54.2536	0.238417	32.4411	0.131247				52.6943	0.471279	11.0899	0.50635	13.1519	0.356663	20.2383	0.443939	33.4244	0.658486	13.5128	0.364256	15.5234	0.654914	9.70114
31.4335	0.265294	9.7678	0.693672	12.4288	0.697107	11.5874	0.851059	14.1656	0.460658	31.5666	0.405424	6.6256	0.917003	63.0791	0.1677	35.8253	0.175455	84.9059	0.153691	14.0826	0.196184	18.5089	0.158938	78.0559	0.152715	95.0674	0.114351	113.725	0.236153	102.279	0.129155				42.513	0.470823	30.6663	0.499794	45.4382	0.353362	88.7252	0.443788	31.6854	0.653045	56.5639	0.362981	28.7176	0.65057	67.4063
7.66214	0.263161	39.8859	0.691254	19.5913	0.696478	26.4905	0.847315	18.3055	0.455823	33.8592	0.402628	34.2233	0.912515	65.5918	0.164818	32.9429	0.173325	123.65	0.151773	125.788	0.193456	39.2386	0.156512	71.8005	0.143479	18.3578	0.114005	81.305	0.231311	112.885	0.124902				29.5685	0.469674	41.8049	0.499296	28.7835	0.349443	10.2497	0.434218	17.1222	0.64834	28.8147	0.362321	27.842	0.648073	48.0107
93.1626	0.261795	12.1275	0.690888	13.0157	0.691811	21.997	0.834445	29.4111	0.453963	37.2449	0.399875	17.4223	0.898905	65.6286	0.164719	75.2439	0.171559	24.9654	0.146363	136.779	0.191142	10.7445	0.155579	57.7224	0.135958	97.7197	0.11383	11.6299	0.221112	91.4282	0.119258				48.2963	0.469353	60.3102	0.497301	22.7737	0.347944	90.1838	0.427454	24.566	0.644691	23.5887	0.360334	33.8235	0.631242	46.7414
64.6796	0.259338	23.1023	0.689481	12.2661	0.663699	18.3319	0.834439	31.4225	0.451351	30.2972	0.396604	16.1258	0.896604	113.364	0.163743	132.227	0.171556	47.6041	0.139336	101.867	0.189959	30.761	0.155048	89.7158	0.134856	68.9598	0.11351	67.4659	0.21869	100.899	0.118715				33.9848	0.469203	12.8764	0.493231	17.9018	0.340114	75.9417	0.421251	25.8712	0.632283	20.5362	0.359382	33.0117	0.630197	38.1548
28.3724	0.258562	65.0641	0.689289	32.2648	0.652371	28.9832	0.823623	14.8725	0.448305	34.0233	0.395734	30.4216	0.893506	79.4272	0.162506	117.641	0.170714	81.2017	0.138759	136.971	0.188573	51.3837	0.154964	27.5918	0.134849	90.53	0.113278	90.3445	0.218294	81.94	0.114126				32.1125	0.468835	23.9988	0.493136	13.4073	0.339123	30.7057	0.419003	29.9934	0.631098	6.0677	0.359267	27.6574	0.62071	24.8046
13.587	0.258117	5.96127	0.688413	25.0289	0.640018	29.8355	0.812767	36.1623	0.446654	39.2888	0.395407	30.848	0.890753	99.4866	0.161485	82.2499	0.158602	35.606	0.138427	15.7205	0.187022	9.73607	0.154726	64.0321	0.124795	98.2083	0.113155	73.4313	0.216826	25.8758	0.112081				24.139	0.460704	18.5765	0.492665	30.2451	0.338789	14.9513	0.415846	49.18	0.627166	4.028	0.356669	21.9892	0.620508	50.2372
49.4719	0.256627	41.4269	0.686722	11.2443	0.631344	17.1673	0.804621	30.148	0.43782	28.8872	0.394989	1.16232	0.883217	126.526	0.161234	100.089	0.154985	129.453	0.136975	135.902	0.179548	84.2852	0.154639	47.0613	0.1231	73.3534	0.11287	31.6002	0.210343	51.9652	0.10958				40.6824	0.460675	47.5509	0.489591	59.3712	0.335548	81.711	0.413388	23.4114	0.625608	25.7525	0.355225	27.183	0.611652	66.8471
14.4835	0.25586	25.8712	0.685737	29.407	0.630158	5.78141	0.793262	16.9775	0.436632	50.432	0.388929	13.8992	0.878028	85.6707	0.156043	72.7748	0.150492	121.74	0.136519	128.06	0.176981	94.9013	0.154375	68.9482	0.121778	108.045	0.112844	51.9777	0.205924	46.0381	0.104041				35.0217	0.451203	67.5855	0.488823	19.7641	0.335507	48.6846	0.412299	31.3664	0.618875	36.2603	0.353228	34.9786	0.601706	63.6199
13.2513	0.251344	13.735	0.685321	22.1715	0.622096	12.3258	0.793074	26.3899	0.43619	38.9712	0.387426	21.7161	0.863736	117.269	0.150947	113.61	0.148426	22.6759	0.136055	129.924	0.174503	26.3123	0.150658	110.784	0.119326	52.2185	0.112408	24.7412	0.197681	88.576	0.101137				22.8441	0.443686	33.8388	0.488794	37.6179	0.333538	128.468	0.410171	54.2288	0.617681	39.199	0.349579	20.8305	0.59705	63.3503
17.4638	0.250968	9.05911	0.680928	54.7599	0.619907	3.56781	0.785931	19.9326	0.433793	20.5864	0.381295	20.1294	0.855117	93.5812	0.150235	58.9121	0.146676	137.266	0.135389	88.7149	0.173147	73.5018	0.149773	85.9393	0.115857	1.24336	0.111979	52.1445	0.194346						12.1171	0.44153	50.4587	0.484734	62.1869	0.330817	75.8214	0.408299	37.7838	0.6143	15.6206	0.343821	33.8301	0.593545	46.1251
2.84043	0.248271	47.3634	0.680808	15.6922	0.619584	18.5437	0.785706	24.5781	0.423444	38.9361	0.37967	3.46202	0.854068	34.529	0.146971	71.874	0.137248	106.936	0.130832	130.143	0.164296	55.7333	0.147836	40.2238	0.108307	84.0782	0.111851	63.0748	0.193394						43.7197	0.440063	61.8391	0.477551	57.3239	0.330533	140.506	0.404237	38.8786	0.60373	16.1058	0.340552	33.6523	0.568966	22.864
46.3094	0.247604	4.97494	0.678202	18.8547	0.61887	15.9296	0.78042	22.0135	0.423256	35.3288	0.372896	21.1621	0.842008	95.0285	0.146362	8.44426	0.130804	55.7323	0.12744	129.479	0.163054	48.4992	0.144468			48.621	0.111097	74.9963	0.186946						43.2541	0.435505	39.245	0.476577	36.3202	0.329885	49.4061	0.401932	46.596	0.601457	58.7521	0.340422	31.8958	0.559353	43.7284
45.7358	0.24437	20.8124	0.677205	27.507	0.613321	25.98	0.779999	33.5216	0.421307	43.5615	0.36959	9.40391	0.836339	79.0873	0.1452	132.046	0.129051	92.8825	0.126935	11.1548	0.159668	55.6071	0.144342			106.933	0.111042	76.7222	0.18148						53.4887	0.429846	20.7909	0.471886	22.0174	0.329336	54.4618	0.401873	14.6786	0.59681	28.8884	0.33659	36.1218	0.55254	67.8121
5.27982	0.24412	17.6645	0.672263	23.7805	0.593455	16.0566	0.779467	28.7948	0.416228	30.7153	0.368819	12.8953	0.834026	101.124	0.144493	35.126	0.128782	80.282	0.124599	51.0699	0.157668	44.8831	0.143802			74.6091	0.110926	88.5044	0.179977						26.4784	0.42641	16.2068	0.471129	7.01477	0.328753	24.4639	0.398937	33.2691	0.585908	7.34602	0.335634	27.4822	0.551362	42.5592
51.5272	0.242572	32.2455	0.669453	12.642	0.587941	19.7997	0.777051	33.7539	0.409882	48.2159	0.368442	14.8008	0.832104	54.163	0.143419	67.1981	0.125064	106.859	0.122114	50.6942	0.157211	45.2257	0.143531			7.07192	0.110786	63.487	0.178746						57.4531	0.42641	44.5234	0.46642	45.1022	0.326668	30.0957	0.397473	13.9356	0.582656	27.9036	0.334953	30.1286	0.550714	13.3457
31.4599	0.239725	12.2876	0.667951	3.39418	0.582416	18.1464	0.771101	25.5842	0.400919	40.5164	0.366752	41.7029	0.831074	19.1699	0.141286	0	0.120332	126.073	0.118703	19.7515	0.152509	15.4477	0.142125			46.3598	0.110571	99.9542	0.174949						42.7283	0.422574	22.3701	0.465907	42.4305	0.325472	36.0569	0.397241	32.5321	0.580433	44.4545	0.332862	46.0862	0.550177	38.5019
30.0567	0.238175	21.1902	0.664438	21.2184	0.574219	42.2783	0.76124	19.532	0.39668	36.7563	0.36611	28.2595	0.819465	81.2703	0.140187	21.6928	0.119467	37.7473	0.117172	114.991	0.1498	29.3224	0.141186			47.3401	0.110451	29.4152	0.174786						24.6415	0.421682	56.3086	0.462672	57.1139	0.323636	35.1026	0.395154	8.79238	0.571816	26.0936	0.331807	32.1707	0.549778	30.6011
8.53573	0.235596	22.2097	0.661999	30.171	0.554395	20.0921	0.757101	30.0221	0.396231	35.9271	0.365237	25.0493	0.816524	49.0104	0.139483	95.0008	0.119261	116.219	0.11643	56.135	0.148343	38.9137	0.140334			27.1628	0.109943	105.901	0.172356						3.90631	0.409057	37.8061	0.461909	30.195	0.323519	22.4999	0.392927	16.6562	0.569775	41.948	0.331507	36.5768	0.547439	34.047
12.327	0.234883	4.09079	0.661846	30.8594	0.546707	30.6603	0.754256	35.5449	0.396119	45.0174	0.361876	37.8668	0.814748	55.1867	0.135704	126.958	0.118555	119.072	0.114471	85.7147	0.14706	63.8942	0.139549			46.5924	0.109831	81.0532	0.17197						77.4169	0.408266	34.5316	0.45807	21.8428	0.317194	59.9535	0.388209	28.5153	0.566898	20.7038	0.331077	32.7191	0.546581	43.854
39.635	0.233873	29.8929	0.660674	39.7063	0.540579	17.4517	0.750152	25.3197	0.393331	39.4592	0.360608	36.6378	0.808092	114.648	0.131575	91.1482	0.116972	96.1171	0.114345	133.543	0.143095	87.8068	0.139524			54.8619	0.109232	58.3298	0.17115						67.0475	0.407681	56.3509	0.456963	32.0321	0.315778	113.722	0.377577	10.0248	0.564429	32.7879	0.322688	36.9592	0.545153	75.7677
24.9519	0.23175	52.3162	0.66006	29.1177	0.5372	27.8814	0.748264	35.6268	0.392458	45.4578	0.360243	19.4643	0.800315	121.042	0.131238	132.826	0.115934	33.3891	0.112109	26.6999	0.14211	22.5559	0.139236			17.3756	0.109034	86.0077	0.169739						36.736	0.40544	23.4749	0.453549	54.8474	0.313598	135.59	0.376522	17.1081	0.559307	27.6945	0.322293	26.0578	0.543228	31.1812
40.5543	0.22759	7.41552	0.659841	32.1623	0.536585	35.1698	0.730979	38.1029	0.391413	45.3808	0.357372	11.2606	0.796588	83.1153	0.130568	4.97129	0.11587	118.774	0.112032	19.1546	0.140081	44.5945	0.138663			87.8006	0.108533	96.3693	0.169625						24.9512	0.40379	21.9278	0.451528	55.9724	0.312923	104.606	0.370414	38.0346	0.557316	35.182	0.321923	28.6405	0.54237	28.9437
23.0071	0.227423	32.5665	0.657652	20.4805	0.534564	20.6428	0.71592	13.1149	0.390198	28.6652	0.349699	6.57587	0.793409	71.031	0.129368	121.498	0.115273	102.368	0.11181	81.1536	0.138779	41.3537	0.138151			36.1727	0.108477	17.203	0.158611						55.0188	0.403197	40.2772	0.450518	27.8366	0.310692	77.4063	0.368236	26.9561	0.555851	21.9191	0.321844	34.1466	0.537038	14.5887
18.1968	0.227411	47.4616	0.656426	15.5744	0.531692	19.5624	0.71541	44.2067	0.389122	34.0688	0.342016	8.91147	0.788326	70.81	0.128232	126.473	0.115061	56.0992	0.110831	117.55	0.138317	44.1206	0.137279			106.049	0.107469	102.711	0.158008						42.3391	0.402756	73.7786	0.449166	40.4897	0.309182	127.029	0.367165	42.6496	0.553757	20.973	0.321187	45.167	0.536312	40.0742
5.25345	0.223076	25.1155	0.64821	35.4066	0.530782	18.3995	0.715204	32.1193	0.385461	50.7226	0.338177	19.845	0.780219	104.431	0.127017	130.698	0.111699	80.3417	0.110686	96.4296	0.134808	62.175	0.136824			64.5546	0.107145	95.7572	0.155864						57.9468	0.400492	56.0575	0.448613	4.68584	0.307123	44.4582	0.358613	42.6582	0.5472	4.69418	0.31943	31.4332	0.534928	62.3597
31.965	0.222983	11.952	0.644255	21.24	0.518224	5.25514	0.71006	38.8749	0.382508	35.9064	0.336456	21.7788	0.77597	34.0492	0.122504	32.2345	0.109158	58.2099	0.107728	118.525	0.13185	8.83753	0.135554			54.8358	0.106928	82.2708	0.155108						11.1108	0.399895	60.9945	0.448332	59.1062	0.306046	46.5138	0.356092	15.6014	0.540722	12.6316	0.318371	35.56	0.532625	8.69016
35.4948	0.219538	58.522	0.643744	26.8902	0.515611	8.74117	0.688155	36.0049	0.37262	46.3615	0.332802	26.0452	0.767949	0	0.120063	21.7757	0.108284	105.907	0.106964	51.1943	0.121069	72.8011	0.135115			28.4043	0.1069	96.5585	0.154987						36.327	0.398604	26.4137	0.446603	48.9763	0.304044	18.0136	0.353131	34.0371	0.53951	34.3034	0.317277	31.0095	0.530688	34.0011
1.38895	0.21776	59.3809	0.642019	25.0007	0.507071	35.3833	0.684891	32.3964	0.372222	51.9611	0.330726	25.819	0.756997	75.4606	0.118186	47.7899	0.108269	55.049	0.106959	84.1167	0.118118	49.7017	0.133516			9.29755	0.10681	63.2822	0.154705						9.24834	0.395905	48.9514	0.445679	36.1304	0.296192	103.78	0.35305	22.1089	0.53831	48.8247	0.316908	60.5691	0.52983	40.782
30.1511	0.216088	23.2978	0.641496	11.4192	0.495986	16.538	0.674422	32.6642	0.363663	38.6459	0.328979	7.0719	0.743884	81.1919	0.112856	73.9972	0.108062	134.077	0.10688	131.073	0.115728	5.3713	0.132885			74.3761	0.105698	4.24838	0.149501						25.8874	0.390907	59.3438	0.442466	26.9422	0.296021	144.351	0.352374	42.7447	0.536135	21.6221	0.316224	30.4234	0.528263	39.5265
26.6934	0.213803	38.8638	0.640558	46.2158	0.495377	33.9359	0.673737	33.4937	0.362712	55.1961	0.32811	5.16969	0.740682	53.9869	0.110849	126.97	0.107677	90.5107	0.104558	102.936	0.114836	4.90583	0.132485			105.219	0.105673	44.9028	0.14668						10.2883	0.389944	40.371	0.439916	48.9568	0.295845	93.313	0.350975	39.7953	0.533718	5.18117	0.315783	20.4708	0.527997	4.76472
23.8663	0.212896	44.4378	0.640015	26.8253	0.494204	25.0028	0.670294	19.2806	0.36154	32.7851	0.320355	10.2522	0.737356	69.0121	0.110069	124.089	0.106998	58.1717	0.103831	20.9426	0.102613	49.539	0.132129			111.705	0.105193	18.2738	0.145399						61.1705	0.388883	22.9279	0.439035	32.2306	0.294856	23.4241	0.348509	34.892	0.531162	33.6283	0.315492	45.4175	0.52635	29.415
17.3629	0.212646	40.022	0.638917	15.8244	0.493484	23.391	0.662168	39.8568	0.361095	47.5957	0.320299	16.0865	0.729677	20.3186	0.109873	135.237	0.10593	139.44	0.102122	62.97	0.102572	20.7462	0.131744			85.4838	0.104875	86.2446	0.145306						19.6641	0.388782	46.0605	0.438371	49.6783	0.293113	109.954	0.342103	29.9037	0.528861	40.5175	0.315401	18.0202	0.522412	69.1221
40.2308	0.210259	51.126	0.637105	22.858	0.487922	30.2548	0.655617	18.4466	0.354206	44.4439	0.316106	23.947	0.726247	61.7409	0.109209	7.6141	0.105752	98.9321	0.101426	108.799	0.102215	31.3419	0.130441			88.0254	0.104619	56.6229	0.145048						20.0189	0.387065	51.8289	0.434939	74.5058	0.291701	145.282	0.33915	42.1801	0.527568	12.5077	0.315264	29.4589	0.515988	28.3769
42.5798	0.209272	57.1826	0.636857	20.4553	0.481611	16.2743	0.653604	22.6358	0.352148	48.7136	0.313535	11.1798	0.724662	119.058	0.107258	121.533	0.105605	52.9509	0.10067			50.4608	0.130215			88.6587	0.103502	103.333	0.14484						42.9859	0.384701	56.7615	0.432505	31.0874	0.290271	70.9528	0.336675	25.495	0.526897	16.4717	0.315205	49.4691	0.511595	51.9707
76.0183	0.205586	19.9687	0.636366	38.4726	0.473898	18.5739	0.652414	31.0072	0.348963	45.2826	0.311196	8.52545	0.723835	74.8866	0.107045	120.473	0.102841	115.437	0.100516			60.1871	0.129895			109.085	0.103143	85.4319	0.142526						12.1424	0.378556	128.204	0.432066	15.5416	0.29003	52.2107	0.334519	38.5692	0.524627	26.197	0.313743	35.8687	0.509463	52.4053
103.713	0.20535	26.4505	0.63604	27.3662	0.472211	23.9508	0.649964	51.2862	0.344212	44.5354	0.308876	30.2489	0.722483	70.7684	0.103982	32.5483	0.102349					48.927	0.129113			75.3726	0.102875	97.2199	0.139828						14.9228	0.377073	17.0448	0.430435	15.6673	0.288877	68.516	0.33028	30.3224	0.521916	29.6857	0.313193	54.8664	0.509079	39.3642
44.3597	0.205031	54.9092	0.631755	17.2916	0.470773	15.0972	0.648859	48.4084	0.339584	32.1998	0.305902	0	0.722252	92.5158	0.102943	58.1038	0.101157					7.21214	0.129029					66.7349	0.137027						49.4904	0.376691	52.1845	0.430052	70.2078	0.286139	113.806	0.328285	27.3834	0.520982	8.88466	0.312809	33.3141	0.508098	55.4604
37.0971	0.204604	11.6882	0.631331	31.1636	0.465387	9.25662	0.644767	31.4956	0.337688	49.8355	0.305827	30.8389	0.720699	10.4138	0.100349	125.235	0.100106					96.1066	0.128599					45.4389	0.135804						32.0895	0.375839	30.0667	0.429886	8.0197	0.283345	107.675	0.322722	4.15836	0.51582	7.03216	0.312525	25.7001	0.505368	33.3445
29.6023	0.204587	24.2961	0.629958	15.3399	0.458936	18.2634	0.644044	35.6343	0.335098	53.3447	0.303913	11.7086	0.720294									13.4006	0.128233					110.105	0.135744						13.6555	0.372317	35.9889	0.429543	24.3543	0.282023	2.40084	0.320756	36.2775	0.513832	38.6844	0.3123	21.6253	0.502185	29.1868
23.9194	0.202536	38.3118	0.629352	26.2271	0.455066	33.3963	0.639547	27.4396	0.33278	54.998	0.2977	19.0533	0.71923									8.05926	0.128118					77.9994	0.133645						42.751	0.368997	66.7646	0.428834	62.9373	0.282021	66.4699	0.311741	24.1651	0.512761	10.5247	0.310292	40.571	0.501361	12.6828
42.8336	0.202135	59.8232	0.628517	26.3909	0.452712	27.1772	0.635818	51.2276	0.330363	45.7659	0.29743	21.3344	0.707372									93.2314	0.127217					38.5687	0.130687						24.6841	0.367212	48.3739	0.428303	58.7811	0.279128	4.26527	0.31149	62.7148	0.509905	25.5696	0.309645	40.0898	0.499495	51.3787
32.9141	0.201962	58.4303	0.624458	15.984	0.446845	23.4178	0.634564	67.1498	0.329206	0	0.295632	28.1578	0.704387									92.3096	0.126686					74.2257	0.126008						56.8818	0.366908	69.6853	0.427641	55.3249	0.277323	40.9603	0.310076	19.1076	0.50931	12.5365	0.307441	34.9293	0.49767	39.3768
0.409595	0.20185	17.3852	0.623902	23.8889	0.446071	35.1645	0.629952	30.3886	0.328779	21.8151	0.286601	23.8804	0.702205									26.1619	0.125642					114.152	0.12547						12.5375	0.365522	31.0606	0.426995	64.907	0.275239	120.794	0.309268	40.5512	0.505747	23.0332	0.303855	33.9353	0.490938	11.8016
68.3555	0.201508	27.1736	0.621919	26.7588	0.442523	43.7335	0.627785	53.6569	0.326315	51.0079	0.281462	24.3786	0.70059									95.5674	0.124105					37.8869	0.12234						38.9438	0.365117	18.6855	0.424806	40.7642	0.275152	62.2468	0.305934	37.4986	0.504513	25.6176	0.302608	37.0797	0.485846	19.9183
80.2948	0.20089	12.199	0.621481	21.1632	0.442476	29.8855	0.623833	52.2541	0.326207	44.346	0.279629	49.6304	0.696307									48.0644	0.123861					70.2132	0.12178						64.913	0.364354	45.9206	0.424581	33.5347	0.274893	141.739	0.297552	18.6448	0.504253	11.5012	0.301888	37.4344	0.479831	32.6334
67.1616	0.199151	65.6092	0.620043	20.5768	0.436691	23.5893	0.621838	20.1488	0.324379	40.6308	0.279508	30.9304	0.69361									77.9987	0.121162					111.271	0.119889						12.516	0.363886	75.7183	0.422447	53.0205	0.273908	64.2522	0.295992	34.061	0.502147	32.5786	0.300791	25.0729	0.478881	63.8171
8.84341	0.199074	28.9598	0.615095	19.1353	0.433838	10.2369	0.621001	25.8589	0.323995	43.0399	0.275964	44.7112	0.686995									85.5718	0.119109					36.4393	0.118836						14.3474	0.36316	63.1385	0.420504	38.2278	0.272631	110.642	0.292602	24.3299	0.501937	22.3684	0.3005	25.1675	0.47399	65.1858
31.9982	0.198409	7.86602	0.614795	31.5274	0.428898	19.4969	0.612409	15.4933	0.322166	37.6144	0.267672	0.611088	0.685221									75.2652	0.119055					27.8808	0.117308						28.6251	0.362781	33.528	0.418523	38.6096	0.272474	129.833	0.291317	32.7311	0.498489	5.51741	0.300346	33.3412	0.46601	12.5161
4.71734	0.197713	44.1561	0.607532	28.3203	0.428226	28.015	0.612188	51.0431	0.31248	21.6211	0.267567	26.2306	0.683563									62.8725	0.116564					52.5348	0.117144						47.0157	0.361133	19.6859	0.418089	82.4859	0.271927	94.6587	0.290886	18.9955	0.496952	34.8139	0.30006	36.4241	0.462795	33.8665
59.173	0.195409	4.06829	0.602486	61.5688	0.425108	1.40545	0.608216	29.1111	0.309609	55.2811	0.266922	31.3949	0.681615									83.4687	0.116549					100.92	0.115439						14.0947	0.360971	68.0882	0.41799	51.8248	0.270197	26.0181	0.289421	48.8816	0.489274	24.8008	0.298406	52.0862	0.454364	16.3565
49.7234	0.194878	58.9725	0.602332	26.8916	0.417186	35.3709	0.607071	22.8974	0.306688	47.3422	0.265044	21.0054	0.670148									58.3054	0.116433					68.9548	0.114436						25.2052	0.360613	43.8068	0.417713	21.5569	0.269898	11.4766	0.288507	23.1636	0.487901	12.7272	0.298009	42.0729	0.454237	63.624
15.1862	0.192292	16.5055	0.600763	39.2613	0.391906	12.267	0.60611	44.321	0.302105	50.7252	0.260632	9.64031	0.661645									9.22863	0.116309					40.5235	0.112331						22.4351	0.360396	39.6994	0.416767	88.028	0.268489	85.5902	0.287662	35.5131	0.484009	23.3261	0.297254	45.9882	0.448954	37.0799
50.5907	0.191861	40.3849	0.598928	29.7939	0.386822	22.4571	0.597863	36.4587	0.300077	45.3295	0.254679	35.9087	0.660252									39.7415	0.116184					90.3912	0.111519						11.513	0.358876	22.966	0.416119	22.3293	0.266996	38.6562	0.2794	53.2723	0.482783	44.6083	0.297075	26.1227	0.44845	18.3603
16.5149	0.190152	32.2221	0.592999	19.0576	0.383894	33.733	0.585459	31.366	0.293549	53.0341	0.252947	34.2601	0.656146									89.8682	0.114565					7.62866	0.108341						32.6204	0.358826	43.54	0.414277	49.0341	0.265527	21.2699	0.273014	34.8444	0.48046	13.0227	0.295776	39.2574	0.447879	11.5297
16.1696	0.188574	72.3528	0.591972	33.3185	0.382211	18.589	0.585219	45.3925	0.286812	28.095	0.251985	10.028	0.653856									7.42673	0.114562					42.7094	0.106178						28.0906	0.358301	39.8191	0.412145	49.3673	0.262366	111.016	0.271538	27.1478	0.47878	22.1821	0.294666	42.1185	0.445189	27.8963
76.4503	0.188465	36.5861	0.59167	29.2314	0.37908	38.3203	0.575947	29.7571	0.285776	46.762	0.251114	25.0157	0.649527									71.7212	0.112326					34.9376	0.105519						50.3984	0.354623	49.0733	0.411156	92.9791	0.261416	74.9177	0.269778	50.4205	0.473912	18.8449	0.293902	35.7137	0.441725	63.0565
64.3729	0.188403	7.67025	0.589748	20.0111	0.376808	27.9452	0.57367	52.64	0.283315	61.9506	0.246935	20.3288	0.647853									31.0709	0.112209					29.6126	0.101313						8.47699	0.351477	66.1539	0.408406	78.1427	0.26061	73.562	0.265903	41.4835	0.472706	18.3267	0.293804	44.7278	0.434889	39.5134
0	0.188078	57.4165	0.586913	49.0081	0.375767	27.1135	0.56896	42.9106	0.280545	51.864	0.24374	51.7098	0.64542									33.1043	0.11193												19.0817	0.350882	6.97463	0.407613	42.7006	0.260314	88.6423	0.249573	20.4932	0.472082	18.3747	0.293762	35.5579	0.433988	62.4186
35.9729	0.188001	33.4338	0.585731	36.9575	0.37402	36.1262	0.561529	32.8054	0.275687	40.9713	0.239755	26.277	0.641888									75.0184	0.111021												0.398826	0.35021	23.6785	0.407194	79.8919	0.257565	68.7347	0.239788	31.0482	0.467774	26.8146	0.293107	41.9491	0.427704	51.0339
58.5195	0.187946	47.6561	0.584879	49.2156	0.373056	36.3313	0.561197	33.0199	0.274214	66.6093	0.237361	57.8771	0.63658									99.8059	0.107451												57.531	0.349464	57.8985	0.405428	43.6518	0.256935	38.7176	0.232566	31.0114	0.465863	23.7518	0.292801	35.5517	0.418368	54.7838
10.5784	0.18648	60.5179	0.582012	34.6859	0.370105	29.5641	0.557162	58.853	0.264981	66.0804	0.234053	33.7213	0.634466									62.8149	0.106201												12.0879	0.348808	35.2168	0.404706	14.7896	0.254875	125.506	0.229915	31.2248	0.464809	20.9683	0.290776	29.2104	0.416583	81.5667
33.703	0.186075	40.0683	0.581171	60.246	0.368229	31.669	0.555419	60.3021	0.264561	42.2528	0.232348	19.1387	0.630837									55.0232	0.105801												77.5388	0.348526	66.5115	0.40378	23.0962	0.253621	57.6817	0.229914	55.3647	0.464559	43.7153	0.28392	33.6955	0.415569	50.3175
113.025	0.183625	43.4986	0.579415	42.9907	0.3676	35.2396	0.548366	43.2302	0.264136	37.0435	0.230792	32.1744	0.628306									44.7846	0.105665												71.8045	0.343237	24.7216	0.403699	17.4838	0.253507	99.8184	0.227887	32.1547	0.463878	16.8543	0.282122	54.7759	0.413081	49.5871
61.9691	0.183185	2.95504	0.578589	41.1105	0.365282	21.8314	0.548159	50.8934	0.260807	49.912	0.229262	7.66547	0.626522									79.6644	0.103665												17.0404	0.342523	67.1526	0.403467	46.5161	0.252592	119.253	0.226972	46.6606	0.463121	24.5613	0.280429	44.8085	0.411699	35.7889
42.9288	0.182308	39.706	0.571658	42.6371	0.363812	36.9593	0.544312	43.3216	0.259136	21.0281	0.227171	19.4271	0.623944									14.5421	0.101401												22.3027	0.339732	73.9053	0.401576	45.9505	0.252401	22.2359	0.226269	39.1042	0.46293	46.9505	0.2799	46.2859	0.408067	22.8988
101.997	0.1821	69.6048	0.570488	28.2375	0.362718	23.735	0.544135	61.5119	0.251326	51.3798	0.227097	35.2365	0.619384									56.4568	0.101385												26.1363	0.33746	37.6128	0.401292	104.341	0.251941	0	0.224432	45.1315	0.461876	8.35493	0.276074	45.8883	0.407751	54.5185
61.1971	0.181635	56.6561	0.569186	36.5659	0.356546	35.6541	0.539163	59.1923	0.250404	25.6738	0.225199	35.1901	0.616987									10.7222	0.101348												34.364	0.335994	69.3055	0.400069	38.2296	0.248963	118.269	0.224023	57.9755	0.461169	3.19048	0.27548	47.3953	0.401677	66.8285
12.3404	0.181452	33.4625	0.56607	33.2614	0.355554	35.1906	0.529923	41.6208	0.239727	37.7361	0.221349	13.8861	0.610951									32.8101	0.101023												15.96	0.335293	29.1554	0.397265	55.3613	0.247783	87.2368	0.223669	33.7481	0.460792	16.9354	0.274585	40.4804	0.400246	38.2529
9.56687	0.181419	29.3287	0.565127	36.5216	0.35385	27.9543	0.528547	53.5814	0.238895	49.7095	0.220898	47.8409	0.60943									85.7439	0.100424												53.6084	0.333144	45.9846	0.396725	40.7774	0.246382	68.9038	0.223548	22.0313	0.460169	43.4368	0.273594	54.8243	0.399224	44.5342
83.752	0.179804	13.8427	0.559639	42.0417	0.353184	29.5343	0.524389	31.2528	0.235678	57.1576	0.219461	37.8884	0.608438									14.882	0.100008												13.8916	0.327711	54.595	0.396083	76.5813	0.245778	19.4298	0.223213	18.9865	0.46016	15.2331	0.27315	39.3033	0.396838	57.872
64.7011	0.178981	52.0711	0.556847	44.9375	0.353126	28.8544	0.521128	48.6744	0.231661	36.9456	0.218319	19.8457	0.608013																						61.9292	0.324071	29.883	0.396056	87.0506	0.244104	73.8076	0.220777	49.9312	0.459594	43.2186	0.273141	48.7725	0.392855	68.5008
46.0611	0.177182	20.1307	0.556128	11.5213	0.352412	29.91	0.519783	38.2438	0.226155	41.7457	0.212853	31.5659	0.606838																						25.89	0.322993	43.1829	0.390145	33.0311	0.24369	24.6869	0.219971	34.2063	0.459298	84.1968	0.270649	45.67	0.392774	3.99051
64.5387	0.176226	14.5523	0.553505	17.7218	0.352318	28.5465	0.505834	48.0351	0.224005	65.971	0.211004	16.3922	0.605004																						12.1642	0.322884	63.0349	0.388963	95.0197	0.24346	92.0487	0.215587	50.504	0.455148	39.288	0.270392	46.015	0.391435	46.6898
44.1251	0.176091	28.43	0.553208	61.7711	0.351954	27.8021	0.501181	51.4027	0.22394	60.4363	0.20338	15.7757	0.604042																						12.9243	0.319108	20.6983	0.387816	50.8824	0.243068	142.072	0.215139	54.2856	0.453628	72.618	0.270171	48.4322	0.389841	31.9217
32.6637	0.17389	17.3796	0.55057	50.169	0.34855	45.4347	0.495643	68.2786	0.222261	56.6416	0.200867	56.4737	0.597888																						31.5129	0.31852	17.9877	0.384813	24.9831	0.242055	54.7207	0.215044	22.7702	0.451113	24.9813	0.26908	43.4431	0.385188	70.1309
75.6146	0.173188	37.0673	0.550344	41.2544	0.344498	33.0923	0.490415	35.4888	0.221293	34.1968	0.200099	39.2301	0.592978																						24.0923	0.318292	52.3809	0.384064	25.9856	0.241901	37.589	0.209763	16.8573	0.448162	13.8656	0.266976	37.2373	0.378528	25.7066
27.4785	0.173184	70.6662	0.546766	22.301	0.343043	37.5113	0.478999	63.2559	0.218594	50.6826	0.19802	37.4781	0.592924																						24.7469	0.318221	58.2197	0.381631	17.1009	0.240937	49.4219	0.208729	32.2135	0.447343	33.5264	0.265944	42.9896	0.375974	61.9198
12.8487	0.17277	44.376	0.544733	1.81592	0.342927	33.0858	0.471547	45.5794	0.216831	56.1178	0.197613	39.994	0.590083																						28.9582	0.316355	23.2977	0.381321	42.011	0.239011	60.7196	0.202249	36.9485	0.446072	45.1087	0.265428	47.9258	0.37589	52.2538
32.2612	0.172371	41.4252	0.54433	58.8097	0.34189	46.6537	0.466393	68.9754	0.216812	53.8549	0.1956	27.0294	0.585364																						51.5361	0.315795	60.9477	0.380114	49.8387	0.237551	55.8077	0.198804	54.3764	0.442507	57.0157	0.26486	31.8814	0.370189	22.1361
4.88641	0.17215	113.724	0.542085	27.6071	0.339069	26.8546	0.462781	57.5928	0.21645	46.8163	0.193645	41.9448	0.585265																						27.4076	0.312899	34.2979	0.380084	91.7079	0.237014	34.3573	0.195886	22.0297	0.442479	18.9708	0.264189	51.988	0.369854	67.162
17.9567	0.171082	43.7883	0.54058	36.4236	0.332142	56.7203	0.458068	47.9022	0.216417	63.5824	0.190997	17.1549	0.582864																						40.5325	0.310024	83.0382	0.376747	71.6363	0.236934	35.0825	0.195707	53.0089	0.440376	26.6932	0.264133	67.4079	0.368106	62.5136
11.4377	0.171047	51.8615	0.539175	46.1498	0.330719	20.0615	0.455985	27.9094	0.214253	54.6733	0.190677	29.9958	0.581044																						46.7716	0.309471	43.19	0.375895	30.036	0.236525	94.7197	0.191374	39.794	0.439907	25.8544	0.262404	37.0282	0.366649	80.3287
17.8044	0.167832	19.9036	0.537842	32.0052	0.326117	28.8525	0.454883	39.3152	0.21292	48.8788	0.189089	70.1958	0.578057																						76.8383	0.308007	58.9919	0.375558	76.4637	0.235947	34.3436	0.183134	47.797	0.435387	42.2547	0.262177	46.5891	0.366159	92.8493
39.2374	0.167562	8.58373	0.537399	48.8295	0.325522	51.9008	0.452878	65.7395	0.212749	51.3246	0.188075	23.6194	0.573491																						44.933	0.307543	84.1656	0.375411	38.867	0.235891	11.816	0.182796	27.7235	0.417413	32.7905	0.259576	44.873	0.365928	76.2706
91.5827	0.16754	28.9395	0.536601	46.1314	0.321166	37.3923	0.452674	67.0617	0.210376	48.153	0.186476	21.2056	0.56112																						22.6019	0.306375	33.5816	0.375399	49.9753	0.233765	8.83744	0.182706	53.3588	0.414269	38.2828	0.257752	46.4852	0.364696	66.7398
19.2056	0.166918	32.9222	0.53359	32.6239	0.314722	48.2195	0.451189	74.8918	0.20905	31.705	0.183702	29.0285	0.558905																						44.2295	0.304166	77.6617	0.372641	16.6367	0.230018	118.583	0.179715	46.4983	0.411028	50.7207	0.256668	57.7825	0.364364	106.48
79.4026	0.166704	7.39642	0.531763	49.4978	0.311431	42.5728	0.448672	47.4646	0.207912	73.0372	0.182165	28.9497	0.557853																						40.0165	0.301404	36.4009	0.372305	21.9303	0.229029	57.893	0.178422	45.3926	0.410405	54.577	0.25585	28.1031	0.359149	39.2841
10.2907	0.164908	82.8633	0.530924	28.728	0.310133	37.8209	0.446192	59.3988	0.204857	60.3982	0.181825	22.0592	0.5531																						76.8071	0.299363	66.7078	0.371796	59.8742	0.228985	34.1072	0.17032	30.1434	0.4076	25.6907	0.255794	56.7338	0.353228	50.0999
19.4022	0.164746	81.4847	0.530436	41.7423	0.307495	35.4658	0.444362	50.9686	0.204001	23.683	0.17961	12.9801	0.551903																						54.2131	0.29793	90.109	0.370945	25.3073	0.228506	127.45	0.16881	48.5314	0.405264	53.2817	0.25576	48.3937	0.340936	52.5728
10.2751	0.164537	18.1324	0.529109	47.8565	0.303957	45.772	0.443107	27.2216	0.199361	56.5365	0.179007	59.4088	0.549436																						18.3588	0.297742	32.4702	0.37079	41.6995	0.228016	69.9022	0.167615	16.3267	0.401656	15.5028	0.254338	49.7854	0.333967	73.3069
37.1856	0.164134	67.8892	0.528084	35.6827	0.303563	43.0612	0.439677	72.9043	0.199116	22.1652	0.177725	49.1901	0.54858																						31.9924	0.297555	49.088	0.369078	25.4692	0.227763	27.1602	0.163126	28.851	0.399413	60.4603	0.253716	64.0295	0.332831	16.5247
33.8445	0.164	26.6806	0.526384	36.0235	0.30236	32.5476	0.436981	58.7406	0.196655	52.2807	0.175475	43.2708	0.547063																						10.2663	0.294144	48.0975	0.368656	23.6555	0.227186	132.274	0.16162	44.6863	0.399192	21.8066	0.253233	36.0638	0.33043	27.4378
80.4378	0.163937	19.7187	0.525187	38.6972	0.299064	33.4892	0.43399	64.0455	0.194168	35.2883	0.175004	36.6516	0.542238																						28.2985	0.293596	56.8143	0.368364	26.9866	0.226506	44.0818	0.161469	47.082	0.395972	34.7947	0.252992	43.8649	0.32948	44.885
28.2679	0.163882	15.1932	0.523778	35.2698	0.294953	39.2649	0.43041	51.8022	0.192314	30.7513	0.173783	34.9759	0.542202																						50.232	0.292176	38.2637	0.367656	31.1663	0.226002	16.2736	0.158685	40.3137	0.39595	18.8853	0.252876	54.3774	0.328532	57.2336
7.78093	0.163172	53.8893	0.522143	34.5565	0.294867	45.5239	0.427823	72.6142	0.186073	25.4867	0.172275	25.0474	0.539906																						42.7435	0.292169	36.5534	0.367181	49.8375	0.225376	97.2418	0.158552	36.1029	0.394304	31.9203	0.25083	63.6618	0.32709	44.0475
10.3882	0.162924	68.8795	0.522014	48.2651	0.293366	37.8733	0.425204	40.3015	0.184725	50.5122	0.170407	47.0294	0.535036																						36.841	0.290699	49.1957	0.365737	52.691	0.222721	46.2761	0.157024	36.9166	0.394236	57.6673	0.247692	58.7492	0.324091	51.8923
39.771	0.161962	85.4377	0.516691	31.3639	0.293323	20.6833	0.423662	55.8022	0.182913	55.1557	0.169734	25.0333	0.533841																						69.8653	0.289799	25.4352	0.364716	56.8375	0.221639	21.0572	0.154287	11.5968	0.393868	50.2627	0.246118	33.0359	0.323438	10.6762
65.2218	0.161763	47.6522	0.515117	30.8008	0.289995	44.9068	0.422394	79.9656	0.182705	57.2148	0.167072	23.1007	0.529126																						25.7138	0.28952	68.7217	0.359674	71.1863	0.219905	112.765	0.152431	29.1364	0.391983	33.9862	0.244931	67.3992	0.31983	48.8241
99.6181	0.161171	136.033	0.513859	49.6803	0.286137	16.4548	0.419014	33.4889	0.182655	66.3422	0.165691	45.3486	0.524443																						10.4306	0.288846	15.5076	0.359296	22.4773	0.219555	16.3207	0.152178	41.6021	0.391922	23.6639	0.243711	49.8179	0.318737	40.0798
17.695	0.161063	68.115	0.513292	30.2545	0.285121	35.0647	0.417641	70.9184	0.175497	31.416	0.163463	64.667	0.523947																						38.76	0.286058	79.7878	0.356565	37.6752	0.218949	72.1527	0.151171	52.6893	0.391756	40.2707	0.240443	43.2126	0.31555	72.7111
116.599	0.160232	65.6484	0.511453	39.964	0.284774	23.2455	0.415523	42.6113	0.174928	61.1458	0.158324	27.4633	0.521404																						31.2803	0.285501	27.1216	0.355904	39.0783	0.218031	19.4542	0.148072	54.1713	0.391112	48.5613	0.239067	45.0824	0.311164	71.1962
56.3108	0.159674	80.7689	0.510513	45.4131	0.282978	39.174	0.410646	72.6992	0.166389	28.3579	0.157391	42.4506	0.517598																						54.7951	0.283689	68.1861	0.355883	34.3125	0.21763	116.418	0.146948	19.0979	0.388691	69.798	0.239055	58.4467	0.310174	90.9599
29.2382	0.158151	29.7408	0.509538	56.2673	0.282811	43.8747	0.406272	62.9448	0.161422	65.1078	0.157035	49.92	0.517304																						26.5087	0.283438	37.781	0.355232	64.4078	0.216766	133.59	0.14535	71.0058	0.387487	30.3942	0.237561	29.7679	0.307525	77.6476
48.1777	0.158015	80.9623	0.507666	53.3511	0.278277	46.7572	0.401528	72.4062	0.160767	54.3994	0.156976	44.6519	0.51561																						77.2779	0.282808	109.404	0.35355	72.7551	0.216735	121.749	0.144069	25.633	0.386015	57.4562	0.237264	53.4858	0.303839	26.9082
14.5944	0.158014	121.922	0.507321	37.5588	0.275076	36.9161	0.401082	41.7511	0.160476	51.0545	0.154321	49.1694	0.515384																						63.1788	0.282793	79.3218	0.35106	35.7858	0.216568	142.381	0.142487	66.4342	0.381035	21.4157	0.236447	40.3496	0.296531	40.4269
55.0573	0.157987	46.1076	0.500524	48.3816	0.274896	50.4434	0.39964	81.6722	0.158426	60.6384	0.150644	50.162	0.513531																						72.6296	0.278872	89.5227	0.349643	85.0792	0.216053	37.7634	0.141115	50.2481	0.377915	26.1037	0.235445	62.7238	0.295306	87.2977
14.8973	0.157107	73.2242	0.499119	35.5692	0.268096	43.9155	0.397385	66.6362	0.15423	43.5884	0.149483	43.5769	0.512164																						70.5818	0.278394	82.2608	0.349479	47.8489	0.215761	45.3258	0.1407	47.0681	0.376425	30.4913	0.235379	55.5161	0.29321	74.5389
81.453	0.156959	84.6213	0.495092	55.7899	0.266697	38.8672	0.397039	65.9493	0.153302	80.4156	0.147993	37.8793	0.506117																						67.7628	0.275098	17.7199	0.348395	50.0021	0.215638	83.3384	0.139959	44.3457	0.374463	40.167	0.235236	61.9739	0.289238	40.4984
58.3749	0.156452	15.166	0.493138	43.1678	0.264024	31.5058	0.396974	89.4628	0.152597	54.4757	0.147511	35.2826	0.499136																						22.0922	0.27484	55.6275	0.348332	41.5129	0.214918	86.363	0.138868	33.4609	0.373715	23.8487	0.234483	47.8012	0.287545	94.5428
76.1437	0.155491	20.8251	0.492984	45.3948	0.262795	40.3152	0.393129	54.6637	0.151526	44.9828	0.145158	56.4985	0.495125																						69.3124	0.27412	53.8672	0.346219	31.5351	0.214537	6.9763	0.1373	59.5131	0.372963	3.66898	0.233396	59.3603	0.286335	72.5424
11.0568	0.15444	59.0571	0.492171	43.5388	0.26237	45.3237	0.388412	69.9472	0.1505	84.2287	0.143885	43.8198	0.490621																						83.0215	0.274088	87.1843	0.346173	52.2673	0.213775	11.9175	0.136612	55.1397	0.372356	53.2139	0.232777	40.1504	0.28477	124.879
47.7479	0.153727	47.9648	0.49167	29.5016	0.262086	56.115	0.38738	69.7378	0.149604	65.6479	0.142686	15.7732	0.486981																						54.1767	0.272503	30.4641	0.343603	30.7885	0.213645	41.5351	0.136393	43.2669	0.359854	47.9772	0.232704	62.8077	0.283953	9.65565
90.0069	0.153622	70.6066	0.484728	36.8826	0.259724	52.2205	0.382844	56.0325	0.149174	67.836	0.140084	53.9246	0.486438																						5.69213	0.272346	100.883	0.343112	62.8056	0.213206	62.9554	0.136311	39.7108	0.359763	53.7442	0.232311	54.6639	0.281708	76.103
29.9413	0.153546	10.3924	0.48306	47.2472	0.257952	27.4549	0.382525	67.3102	0.148391	62.2037	0.13896	19.7677	0.476638																						23.215	0.268018	33.8961	0.342712	42.0552	0.212054	69.5948	0.134424	65.752	0.359489	55.5956	0.231888	61.7613	0.280787	59.3689
25.2559	0.151728	17.0417	0.481485	60.2975	0.257555	54.0399	0.381442	64.2664	0.145117	56.1113	0.138756	57.3542	0.475263																						15.1256	0.267908	36.08	0.341558	88.158	0.20725	111.047	0.133929	34.0898	0.359484	29.8995	0.228906	61.7717	0.269031	88.4699
107.318	0.150471	102.103	0.479086	62.3105	0.255678	33.4213	0.379727	44.9029	0.144782	81.6843	0.13864	48.6442	0.471278																						9.45003	0.265814	41.2888	0.341158	55.5701	0.205237	4.77448	0.132743	9.91807	0.358398	50.3383	0.228795	77.1205	0.268146	54.6676
52.163	0.150356	62.4856	0.47818	57.2024	0.255116	49.8157	0.372906	52.2919	0.143416	62.5638	0.138149	38.4635	0.469135																						36.5644	0.263364	99.4904	0.340724	70.7131	0.204447	24.0749	0.131943	33.1099	0.356375	71.1831	0.225723	58.3977	0.266699	75.7767
81.5915	0.148222	99.7552	0.476877	56.2887	0.250563	39.7192	0.372665	89.4411	0.14339	62.1951	0.13812	69.7927	0.464685																						33.785	0.260838	86.7554	0.338185	23.8444	0.202831	141.074	0.131291	59.5986	0.353103	42.8875	0.224504	58.8316	0.262561	79.6462
91.2198	0.146815	26.0045	0.473759	40.7955	0.250095	32.9041	0.371656	19.9841	0.142646	56.0047	0.13777	17.8416	0.463725																						17.0481	0.259393	64.7033	0.336409	9.84569	0.201783	13.2491	0.12838	45.0611	0.352836	54.4498	0.223491	46.8702	0.26239	54.931
74.1239	0.145943	87.1073	0.472699	62.9534	0.248879	44.7287	0.368695	88.7628	0.142369	59.6996	0.136301	33.9467	0.461645																						39.3249	0.258326	15.812	0.335529	43.7971	0.200088	117.659	0.126776	40.8062	0.346857	45.2352	0.222732	78.8388	0.25687	51.3785
52.0695	0.14445	24.9354	0.471079	61.7159	0.245752	50.0403	0.367349	81.0786	0.141933	73.0442	0.134025	65.4643	0.460203																						51.7049	0.257024	25.4101	0.329324	18.5067	0.199874	29.2168	0.12585	24.6896	0.346626	23.1668	0.221235	60.5509	0.256557	82.8134
88.3628	0.144152	11.2304	0.470313	0	0.240182	64.8301	0.36201	40.7894	0.134561	80.7047	0.130859	54.5093	0.458138																						20.8887	0.256362	43.3274	0.328996	85.3806	0.199574	55.9266	0.125702	23.0981	0.343808	43.4534	0.220103	58.8942	0.246827	60.173
112.629	0.143786	84.9474	0.470308	36.7846	0.23841	63.3922	0.356913	41.5961	0.134313	40.5847	0.130051	42.6238	0.454401																						18.0189	0.255898	30.2454	0.327219	86.776	0.199402	104.303	0.125693	63.2285	0.343373	38.324	0.220089	64.168	0.245538	94.0001
9.78797	0.142857	57.0059	0.469854	44.7248	0.235253	44.6463	0.351501	35.4066	0.134158	59.0158	0.122329	61.9626	0.449547																						28.3963	0.254724	86.7275	0.326999	48.2007	0.198854	114.821	0.124574	42.7247	0.342365	40.8662	0.219217	76.7915	0.24517	26.0027
45.2504	0.142724	98.7424	0.468527	53.8768	0.235016	46.4418	0.34357	84.6225	0.131595	71.604	0.120094	59.9308	0.445338																						39.1968	0.253808	64.1105	0.326814	63.1462	0.198657	21.8644	0.123002	68.6944	0.342161	49.8943	0.217168	60.0397	0.244613	45.1187
62.6598	0.141182	77.8096	0.46796	36.1937	0.233992	59.2398	0.334625	103.251	0.131177	84.5559	0.119776	52.0181	0.441597																						13.8209	0.251768	68.0093	0.326586	36.2893	0.197452	68.8809	0.121464	55.0732	0.341591	49.9045	0.216163	62.6647	0.243939	65.2401
65.8568	0.139837	85.3761	0.467423	70.9575	0.233931	36.3137	0.333974	73.5767	0.129205	72.1316	0.115718	51.7499	0.43666																						61.5284	0.251617	35.0728	0.326091	74.6097	0.196163	129.493	0.121096	51.4078	0.341253	23.1117	0.215954	74.7592	0.243512	22.3169
10.5442	0.138852	90.0029	0.466532	63.7562	0.233305	52.8172	0.332669	86.2816	0.129153	82.5964	0.111614	38.2263	0.432523																						10.9158	0.25127	77.5107	0.32588	32.1681	0.194313	44.3923	0.12095	35.9637	0.340565	39.2634	0.215299	59.4772	0.232308	70.9753
127.674	0.138317	55.0539	0.46649	57.2062	0.23308	35.6651	0.329129	69.5229	0.128851	67.0948	0.1108	42.9376	0.426476																						79.3904	0.249771	36.5812	0.325282	43.9952	0.193143	85.3763	0.119473	53.0116	0.340027	67.7843	0.213916	68.4092	0.232161	64.9729
25.5798	0.137604	22.8434	0.464679	55.3285	0.23028	57.373	0.326435	84.5594	0.128049	38.7918	0.110451	42.7876	0.424391																						3.72089	0.248998	50.9492	0.325135	84.1348	0.192822	39.8657	0.119274	60.4524	0.336829	43.7757	0.211188	72.4099	0.228749	72.3035
48.0134	0.136984	24.426	0.461493	60.0887	0.229586	33.4194	0.323902	78.5709	0.126248	67.8991	0.109526	36.8093	0.423892																						65.5645	0.248742	28.5816	0.324877	88.6021	0.192388	63.2774	0.118475	37.7063	0.335418	15.5271	0.210987	55.813	0.226931	18.6242
14.7574	0.136454	17.7694	0.460722	40.5259	0.229236	44.9482	0.319904	95.88	0.125856	76.068	0.10788	43.1007	0.417917																						41.8213	0.248616	21.1821	0.324064	98.3903	0.19015	66.3264	0.114796	21.2337	0.333399	58.0586	0.210985	79.372	0.226429	90.4033
92.9253	0.136176	133.882	0.460326	46.2897	0.228796	43.8519	0.318402	79.9643	0.12539	41.2809	0.106251	40.8941	0.415624																						93.5916	0.245871	109.741	0.321743	90.0988	0.189689	29.1381	0.112853	53.1123	0.331793	58.4513	0.209225	75.039	0.226398	96.4653
80.5085	0.135516	32.1599	0.459202	46.2036	0.227596	51.7392	0.312658	60.9095	0.123855	120.098	0.106177	33.6011	0.411063																						15.3045	0.244809	81.2904	0.321517	69.3163	0.188768	42.2474	0.112473	25.0032	0.331425	67.4522	0.207796	79.1376	0.220887	86.7183
14.9038	0.134017	99.6097	0.459179	47.7648	0.226758	39.2866	0.311532	47.3409	0.121403	88.4601	0.105859	46.2753	0.405815																						47.3632	0.24098	83.9294	0.321457	64.657	0.188286	26.6059	0.109283	24.2896	0.329714	49.6972	0.207463	43.3715	0.22039	97.404
111.936	0.133731	36.7575	0.458397	44.7609	0.220075	55.5674	0.309855	50.5269	0.121386	81.0082	0.105749	25.3099	0.404489																						35.9568	0.238436	35.9745	0.321288	19.1143	0.188282	140.928	0.108516	60.3233	0.329353	61.6311	0.207146	66.7917	0.21942	63.6124
56.8921	0.133596	32.2897	0.45825	35.7117	0.220023	51.0668	0.308684	98.7146	0.121219	45.7494	0.105704	35.1367	0.404112																						17.1314	0.238308	49.7141	0.31793	108.64	0.188069	56.0766	0.102249	41.8011	0.328589	49.3385	0.207038	65.4669	0.219022	74.4167
28.0444	0.132892	7.42517	0.457489	51.6185	0.219091	59.4277	0.303897	71.2211	0.117898	51.854	0.104709	35.9385	0.403401																						14.1411	0.236065	122.647	0.31739	20.7588	0.186864	3.29242	0.102042	23.9062	0.326926	23.1883	0.206009	42.5784	0.218773	61.7664
54.6881	0.132185	42.7409	0.456845	46.1288	0.217437	39.8197	0.30372	34.4703	0.115758	47.258	0.102535	40.0852	0.401027																						42.897	0.235504	58.8671	0.317322	69.5559	0.180321	38.132	0.100637	49.1845	0.324998	57.2003	0.205998	36.2201	0.214602	109.723
107.115	0.130236	28.3735	0.455826	58.0633	0.210877	40.7686	0.303133	99.3059	0.114226	53.6405	0.101651	50.2094	0.397669																						38.7825	0.234082	42.861	0.316528	44.1677	0.179699	106.766	0.100287	67.7041	0.324829	31.5207	0.204552	63.0348	0.213049	100.075
77.3841	0.130145	54.2072	0.449888	36.3604	0.207466	57.3465	0.301952	53.304	0.114056			62.5688	0.389358																						8.6669	0.233954	99.0793	0.315775	23.8113	0.178281			12.3485	0.324642	16.6522	0.204506	84.8827	0.207391	56.1986
9.42371	0.129103	68.0359	0.448985	31.1366	0.204265	63.7843	0.301133	68.151	0.111899			56.3411	0.386842																						6.89824	0.232116	87.9013	0.314307	48.3568	0.177319			61.0155	0.323139	46.1926	0.204454	73.0015	0.203405	21.2785
51.2251	0.128969	28.7076	0.448675	50.1196	0.200573	58.4544	0.299788	96.967	0.111164			56.0833	0.385615																						10.746	0.230745	79.754	0.314071	76.7118	0.177015			11.417	0.321168	51.3517	0.203524	88.2021	0.202858	129.701
89.5054	0.1288	17.2086	0.448326	41.1716	0.19599	44.3255	0.295495	95.2074	0.110811			29.5318	0.384122																						35.1371	0.230559	52.692	0.310499	63.7787	0.176442			33.575	0.320791	64.6826	0.203353	56.5697	0.202336	50.1352
57.1255	0.128712	84.2114	0.443983	48.6025	0.195258	43.6135	0.294564	101.325	0.10993			51.7063	0.383134																						29.2561	0.229895	79.0289	0.309758	47.4555	0.176138			46.5957	0.316985	9.90943	0.202099	64.3167	0.200962	68.5767
60.8947	0.128578	80.4671	0.440793	54.9673	0.192304	62.5078	0.293002	82.5252	0.109461			41.9789	0.380072																						56.2042	0.229494	36.5072	0.309729	84.8293	0.175735			66.8785	0.315921	10.358	0.201254	85.2831	0.199674	117.999
75.2782	0.128499	98.9808	0.440586	64.5049	0.191962	46.1515	0.289466	97.9698	0.108524			35.9989	0.377473																						35.2701	0.228964	91.7976	0.309402	60.756	0.175576			63.6017	0.315198	42.9013	0.20122	63.3631	0.194094	52.3699
100.796	0.128163	57.3599	0.440474	38.1008	0.191947	58.2009	0.288259	118.28	0.108313			30.0787	0.371733																						58.1033	0.228845	96.9797	0.308145	18.9901	0.174249			19.5359	0.314186	42.8211	0.200165	46.435	0.193956	80.3462
45.1538	0.12689	42.7559	0.437853	55.799	0.19147	51.3649	0.28611	81.2218	0.108132			60.1803	0.370459																						100.271	0.228014	43.3944	0.307467	72.9867	0.173653			36.1783	0.313037	32.8391	0.199425	79.0096	0.1914	53.9522
39.8792	0.125977	116.27	0.437388	82.9274	0.188773	65.6234	0.285585	121.516	0.106566			42.508	0.370353																						49.7444	0.227324	46.4461	0.30731	36.6008	0.173444			70.1924	0.311337	92.4511	0.197137	70.1356	0.191092	16.985
91.6026	0.124947	20.5385	0.436192	66.186	0.187289	59.9264	0.284368	91.7542	0.100248			47.46	0.369005																						62.3194	0.227273	48.3426	0.306355	46.3249	0.172619			27.5294	0.309954	28.1263	0.195977	34.8599	0.190305	22.4271
63.3569	0.124706	30.6288	0.432443	70.1846	0.182245	51.0294	0.28319					46.4257	0.36113																						56.712	0.2268	64.1705	0.303559	50.9241	0.17223			43.1942	0.309756	63.6106	0.195584	73.9636	0.189213	94.3953
67.135	0.123988	62.9566	0.430718	34.2651	0.182017	40.8873	0.281787					38.1608	0.359713																						80.063	0.22584	64.9541	0.303258	23.9149	0.171591			23.9426	0.308487	29.1233	0.195546	85.6242	0.188321	91.0475
66.6159	0.123768	107.241	0.430366	36.8741	0.178827	43.0681	0.276373					39.9725	0.358732																						77.5719	0.224727	87.4937	0.302801	29.4279	0.171495			78.2945	0.30684	57.3192	0.19459	71.2329	0.18726	81.4632
27.1014	0.123061	119.01	0.428274	75.6624	0.173429	69.1418	0.273071					57.0762	0.357107																						86.8714	0.223768	108.466	0.30229	69.1177	0.171486			42.7862	0.306595	33.4883	0.194085	67.8353	0.184235	60.7079
63.9643	0.122955	93.3024	0.426145	96.4535	0.169615	67.0952	0.271786					41.6615	0.355538																						53.3862	0.222176	90.1745	0.302081	113.655	0.171165			71.963	0.306117	54.7599	0.191316	55.7858	0.182116	30.8547
50.9277	0.122417	24.3835	0.42574	46.385	0.169111	52.985	0.270255					60.4152	0.354975																						36.441	0.222053	94.7775	0.301207	64.4079	0.169681			61.6805	0.30525	51.3089	0.190731	78.9831	0.182031	125.588
37.571	0.122392	32.5834	0.424038	80.2645	0.168312	48.1035	0.270131					43.3079	0.354373																						6.73095	0.221898	80.4449	0.301023	49.6383	0.168476			49.846	0.303404	69.9954	0.189895	94.2014	0.177585	86.3262
44.7584	0.121928	34.4919	0.41988	55.2366	0.166654	57.5186	0.263565					40.7558	0.35385																						74.4743	0.221201	25.16	0.300337	83.6384	0.168009			91.8494	0.302928	64.1032	0.188213	74.7568	0.164067
76.1242	0.120757	47.6523	0.418964	61.9675	0.165575	46.9551	0.262852					51.7259	0.352093																						87.0305	0.218725	28.1424	0.299543	52.2788	0.167234			36.088	0.302771	46.186	0.187684	75.7397	0.161503
23.4763	0.119577	87.3487	0.417403	59.0917	0.164078	81.171	0.260942					59.4514	0.352066																						12.5109	0.218657	100.755	0.299062	27.3483	0.166076			43.6463	0.30109	42.3795	0.186121	45.12	0.158548
39.2026	0.119523	24.1969	0.415524	80.9669	0.163396	67.2927	0.249077					48.2158	0.349879																						14.5546	0.217549	42.6183	0.297014	27.1919	0.165758			13.6355	0.29886	41.2812	0.186058	74.3903	0.155975
84.0237	0.119072	106.76	0.415447	62.3888	0.162902	49.0749	0.24876					49.4539	0.348569																						43.785	0.215947	24.0283	0.29681	36.6937	0.165083			18.4035	0.298531	39.4616	0.185938	0	0.155214
25.4861	0.118487	96.733	0.414771	47.4865	0.162063	75.6841	0.241831					53.7287	0.345113																						52.8233	0.213278	79.226	0.29601	53.1321	0.164237			41.3862	0.298034	72.4753	0.185628	68.3486	0.15514
30.0234	0.117774	111.453	0.413377	55.1001	0.160038	39.564	0.239246					61.1857	0.344283																						59.2212	0.212012	48.1846	0.294033	91.4111	0.163417			15.8839	0.297837	80.8485	0.185567	72.9404	0.153021
79.4107	0.117327	89.3241	0.412457	79.6229	0.159192	67.0569	0.237871					54.0607	0.339837																						71.6579	0.21102	52.9811	0.293581	100.051	0.162729			73.6086	0.292263	55.4586	0.183146	66.5365	0.151808
11.7927	0.116155	31.3684	0.411864	65.0518	0.158839	54.6395	0.235449					56.7049	0.332657																						12.8929	0.210865	13.7568	0.293017	72.4525	0.162679			46.7788	0.291304	31.5443	0.18229	84.111	0.151383
12.8778	0.115599	122.441	0.409825	39.6456	0.157833	41.5924	0.235363					51.8827	0.331112																						41.0018	0.210414	83.6066	0.292736	100.215	0.161433			55.6866	0.289819	15.1325	0.180814	68.4475	0.150236
10.332	0.115331	53.7643	0.409323	96.077	0.157066	85.7557	0.230014					50.0482	0.328863																						26.9869	0.209426	55.7978	0.291537	33.7249	0.1611			63.5996	0.289071	18.1282	0.177073	52.1688	0.148063
28.4227	0.114834	14.3763	0.407767	93.3826	0.15628	57.0971	0.225799					45.624	0.327907																						21.8651	0.208531	58.6858	0.291122	112.582	0.157913			58.0979	0.288666	28.3024	0.174621	53.6147	0.147037
17.4393	0.114521	77.5725	0.405797	65.2266	0.152201	52.0842	0.225197					50.7201	0.32774																						75.7084	0.208428	25.0952	0.289708	35.9947	0.157633			27.0425	0.288065	55.4815	0.172307	108.638	0.146942
105.872	0.113259	68.2	0.405694	72.8862	0.150791	70.7986	0.224923					57.8204	0.325261																						25.9913	0.208119	65.277	0.288129	45.2483	0.156599			51.3907	0.287951	69.5094	0.17187	63.5382	0.146574
114.645	0.112813	63.5296	0.404847	67.7628	0.148243	48.4802	0.222528					55.2835	0.324576																						0	0.207618	60.3912	0.287525	31.9106	0.156352			64.7837	0.287699	86.4543	0.171296	92.7807	0.146546
110.209	0.112546	46.4748	0.404066	64.0301	0.147044	70.0795	0.221576					55.2805	0.318013																						39.2145	0.206911	101.477	0.287068	77.1417	0.155971			20.6007	0.287042	41.616	0.167325	96.7309	0.144608
76.0824	0.112315	116.157	0.402995	63.3994	0.146654	85.1591	0.220311					47.3745	0.317756																						18.0446	0.205021	78.7683	0.286794	67.2748	0.155653			71.221	0.28363	74.415	0.167322	18.4727	0.141834
9.56429	0.111583	117.877	0.400755	47.745	0.146421	59.1064	0.218784					57.8721	0.313305																						55.1525	0.204491	43.5688	0.286503	57.4176	0.152625			57.8851	0.283032	55.3013	0.167183	58.0276	0.141296
73.1954	0.111434	34.1593	0.399515	82.6112	0.145426	83.8933	0.217141					65.0911	0.310299																						11.2543	0.204409	42.788	0.286419	36.7439	0.15259			56.7458	0.282626	47.0833	0.165517	76.5294	0.140974
42.0455	0.111157	124.745	0.398293	95.4875	0.141936	70.9682	0.215276					55.6809	0.308598																						25.1671	0.204387	49.9061	0.285965	63.6143	0.150493			40.9746	0.280601	27.103	0.164763	65.8145	0.138251
127.485	0.11089	24.4975	0.397054	90.0492	0.141437	48.7737	0.21413					68.5019	0.303459																						46.1082	0.20363	41.4292	0.285947	32.2389	0.15009			62.4078	0.27567	56.6557	0.164248	68.053	0.137295
74.6111	0.110756	77.6698	0.396064	73.1701	0.140104	62.7408	0.212569					42.1165	0.302293																						45.6466	0.202931	60.5493	0.28496	63.7593	0.149895			47.574	0.27538	93.281	0.162078	55.1799	0.136511
115.797	0.110157	128.847	0.393254	31.8408	0.139642	50.9986	0.209531					47.0218	0.291039																						72.2808	0.2023	33.7493	0.279342	55.9073	0.149482			27.3968	0.273794	63.3975	0.161177	81.1646	0.134474
34.2572	0.109428	129.985	0.392723	76.3337	0.137248	49.759	0.206413					71.2129	0.289676																						22.7052	0.20226	99.3851	0.277978	67.8777	0.148802			43.2087	0.272285	42.7569	0.160477	68.2076	0.133766
86.1041	0.109336	16.7572	0.39215	80.5616	0.136625	86.2961	0.204537					69.5776	0.289364																						40.959	0.20002	34.7898	0.2776	46.7422	0.148083			73.4741	0.271197	46.2033	0.160391	86.5439	0.1317
31.1418	0.10927	113.061	0.387068	58.0142	0.136622	30.4374	0.196351					54.204	0.287785																						22.3023	0.199763	49.1904	0.276956	92.5942	0.147311			37.6743	0.270475	27.6038	0.160112	107.686	0.128744
118.171	0.109021	32.5983	0.385	69.5025	0.136453	65.4339	0.188763					51.7591	0.282352																						67.7912	0.199336	45.0202	0.276207	72.8878	0.14672			46.3641	0.270396	18.0622	0.158362	82.5999	0.127968
95.2121	0.108573	69.6075	0.383029	61.1882	0.136093	67.6367	0.186022					30.7777	0.275553																						49.2934	0.19599	13.7327	0.276097	81.8073	0.146071			67.4397	0.27015	49.9399	0.157215	77.6727	0.12709
107.637	0.108292	102.893	0.377465	69.7462	0.135459	62.426	0.18469					55.5058	0.271079																						45.7985	0.195851	96.3655	0.275801	46.2878	0.145749			35.2681	0.269957	37.5799	0.156013	126.433	0.126284
44.707	0.108084	49.9021	0.37744	78.9007	0.134323	77.9266	0.184398					61.3747	0.268744																						81.1801	0.195456	98.7433	0.275374	36.5695	0.145361			34.3158	0.269723	60.2554	0.155783	121.873	0.125716
75.9931	0.10782	68.9885	0.376582	96.3378	0.133255	74.1128	0.183167					61.1285	0.266064																						0.128368	0.194552	25.5759	0.275027	50.6266	0.145024			32.1817	0.268767	51.9922	0.152983	101.539	0.123723
59.4621	0.10599	54.652	0.37364	56.5455	0.133174	41.2402	0.181041					66.7953	0.265302																						15.9044	0.194032	43.0444	0.274519	102.265	0.144835			78.1406	0.266838	23.8484	0.152415	63.5089	0.122265
93.9057	0.1058	26.2614	0.372676	67.9437	0.132985	80.7073	0.17551					51.0983	0.263501																						48.8284	0.194021	53.6434	0.271753	73.9074	0.144016			41.2479	0.265081	63.8379	0.149531	121.118	0.120925
21.165	0.105779	45.2663	0.371787	41.4578	0.131979	67.8804	0.175487					62.5913	0.258099																						8.09817	0.193769	50.1721	0.271372	107.539	0.143051			28.7296	0.261249	77.9587	0.147829	93.2696	0.120384
72.7567	0.105412	127.269	0.371174	79.9536	0.130191	69.9147	0.174454					81.7157	0.256737																						21.3176	0.192726	72.8614	0.270412	73.4201	0.142326			26.7051	0.260183	52.1322	0.14735	77.6199	0.119994
114.618	0.103426	13.5577	0.370702	84.1113	0.129888	62.3308	0.17215					57.0814	0.256621																						34.9839	0.19092	60.7962	0.270355	46.7309	0.141116			31.1154	0.258393	16.5986	0.147086	57.3508	0.119573
63.5959	0.102899	127.462	0.367421	72.6236	0.128158	81.6694	0.171058					43.5468	0.255377																						91.5524	0.190895	84.4148	0.269814	29.9242	0.140912			24.8137	0.25567	59.4006	0.144692	81.3761	0.119038
88.3959	0.100897	132.769	0.366296	103.842	0.128155	87.6068	0.165774					70.9845	0.254921																						50.2016	0.190698	36.216	0.268165	55.8232	0.140873			56.0534	0.254925	91.7792	0.144523	93.7653	0.115281
89.9777	0.100828	39.8166	0.364005	71.6971	0.127405	109.913	0.165575					42.5582	0.253465																						67.5171	0.189167	16.6154	0.268048	58.8993	0.140055			42.1559	0.254654	53.646	0.141201	86.5101	0.113008
25.8276	0.100614	31.3303	0.363933	96.1006	0.127246	70.7334	0.165281					57.5674	0.250241																						81.016	0.188183	43.3216	0.267968	25.0693	0.139809			77.8166	0.254606	28.9504	0.138878	50.4317	0.112995
65.7964	0.100175	19.4659	0.363228	101.119	0.127081	57.2166	0.163928					55.7859	0.243675																						79.2234	0.187506	72.2739	0.26771	32.5633	0.136557			56.8058	0.248754	68.1196	0.138745	89.3228	0.112367
69.3511	0.100009	111.319	0.361662	9.17571	0.127047	87.8426	0.161569					47.0117	0.243382																						36.3197	0.186375	55.4343	0.265958	28.2413	0.135806			28.2034	0.24582	70.0429	0.138047	76.6778	0.110762
		56.1772	0.36077	52.1737	0.127006	93.4965	0.161323					70.1796	0.243077																						49.7831	0.186082	117.754	0.265719	115.603	0.135752			32.7991	0.245447	80.1104	0.137515	88.961	0.110097
		81.0109	0.360181	76.4987	0.126308	96.4335	0.161052					57.621	0.239674																						83.9535	0.185816	78.5466	0.263963	48.6123	0.135504			67.371	0.245437	81.8238	0.136861	103.951	0.109479
		87.7701	0.358749	104.378	0.124223	60.1011	0.160932					71.3738	0.239342																						34.6827	0.185056	19.9625	0.26391	14.4094	0.134137			59.6413	0.244132	25.4633	0.136236	61.1135	0.107127
		75.7835	0.35212	60.9293	0.122186	51.2404	0.158913					84.1445	0.238678																						61.5677	0.184412	72.2562	0.263449	59.988	0.133547			88.3131	0.24271	59.157	0.135941	66.6309	0.106132
		136.357	0.350602	73.9882	0.121016	75.5396	0.158333					67.823	0.238189																						12.0958	0.183381	25.8527	0.262813	23.3661	0.132204			63.4251	0.240966	65.4992	0.135334	123.507	0.104964
		38.2717	0.34996	69.0259	0.119847	72.4531	0.156897					75.086	0.237772																						53.0568	0.181404	89.4756	0.262667	111.433	0.132025			44.3883	0.240686	41.797	0.133318	43.5373	0.104459
		64.0502	0.349519	59.0524	0.118055	88.632	0.154554					71.2023	0.237226																						119.267	0.179437	54.7242	0.261992	39.5483	0.131773			64.2399	0.24048	17.0038	0.132261	56.0856	0.103394
		19.7633	0.348084	101.285	0.117678	78.7227	0.153691					2.39265	0.236991																						70.3694	0.176135	99.6826	0.259884	48.5483	0.131583			37.9585	0.236032	63.2784	0.131996	97.8	0.103191
		121.516	0.34802	73.5892	0.115993	72.3175	0.151433					44.1451	0.235286																						6.72609	0.174708	49.0692	0.259859	66.7284	0.131452			60.4476	0.235761	22.4816	0.131643	91.8308	0.101107
		57.2794	0.347466	117.967	0.115807	45.2446	0.150829					64.6325	0.233922																						56.3664	0.173743	81.7967	0.258762	101.251	0.131313			61.3952	0.234936	45.0591	0.131627
		30.5832	0.346996	83.4672	0.11568	72.5189	0.14854					55.2519	0.232919																						9.65691	0.172511	69.9083	0.258484	38.6827	0.131297			38.0121	0.234505	47.7116	0.128973
		63.0282	0.34235	119.008	0.114355	69.0305	0.147619					60.3488	0.231087																						67.3994	0.171781	24.9075	0.256005	106.081	0.13067			77.9329	0.232944	76.486	0.128121
		99.8804	0.342182	46.1887	0.113455	65.3568	0.147334					78.6878	0.224851																						20.5249	0.171587	34.3305	0.255888	65.6929	0.130268			11.855	0.231115	79.454	0.127983
		45.789	0.342004	99.093	0.112921	49.9952	0.146498					63.4565	0.223938																						31.166	0.170614	31.4829	0.25544	93.2889	0.128364			23.5385	0.230088	19.0074	0.126446
		95.084	0.341448	73.3439	0.112216	45.1648	0.146127					73.743	0.223055																						29.9602	0.168912	35.474	0.25445	76.436	0.127864			62.7566	0.228545	26.5208	0.123164
		123.157	0.340845	81.8334	0.112025	99.0925	0.144693					62.3045	0.218056																						33.521	0.16629	73.3273	0.254151	13.0711	0.127442			52.8453	0.228366	109.035	0.122691
		24.8254	0.340638	89.7573	0.111096	83.8085	0.143204					56.9594	0.216127																						88.0043	0.166118	23.1354	0.253928	69.4876	0.127053			59.1437	0.227753	69.1379	0.121887
		114.94	0.340389	100.737	0.110768	97.7098	0.142505					42.6877	0.215274																						104.135	0.165978	110.238	0.253528	64.134	0.126945			45.8588	0.226995	102.903	0.121181
		133.184	0.340305	62.0622	0.110362	62.2761	0.142056					70.3803	0.209602																						40.9015	0.165846	99.9222	0.253022	92.4962	0.126746			42.2327	0.226968	63.8224	0.120935
		76.0758	0.334433	74.4494	0.109813	71.9675	0.141851					86.4089	0.20886																						65.8058	0.165299	75.587	0.252667	111.949	0.125991			65.1359	0.225071	93.4067	0.119885
		2.14626	0.333727	57.6334	0.109653	74.1549	0.141574					72.9842	0.207054																						27.3998	0.164641	33.8277	0.251984	79.4221	0.12504			49.7428	0.223715	66.1563	0.115746
		43.5889	0.331842	128.734	0.108926	91.9745	0.138183					79.1192	0.206107																						88.1025	0.164434	100.763	0.250977	63.1106	0.124631			61.8664	0.219468	70.9759	0.115637
		136.098	0.330566	59.0391	0.107942	88.447	0.133311					64.8806	0.199224																						20.1503	0.163902	89.3301	0.250719	78.6007	0.1233			24.6102	0.219164	91.7068	0.115345
		25.4535	0.327456	136.018	0.107152	84.4446	0.132262					66.9946	0.198862																						70.0176	0.159878	64.8566	0.249983	52.9008	0.122917			30.7222	0.217757	29.4236	0.114676
		45.0966	0.325996	108.632	0.106642	102.581	0.130935					76.7514	0.198632																						95.4369	0.159829	106.921	0.249916	45.6487	0.122888			46.8692	0.217037	78.1836	0.112242
		115.554	0.32418	68.737	0.104319	51.1809	0.130741					82.2251	0.19862																						12.5055	0.159632	25.195	0.248788	119.712	0.122711			68.935	0.214997	58.6579	0.111039
		57.8984	0.322213	134.158	0.104311	50.5294	0.130722					60.9826	0.196947																						54.0448	0.158268	69.3985	0.248408	45.0292	0.121777			46.0282	0.21485	89.3553	0.109069
		45.4229	0.32047	82.8436	0.103749	92.808	0.128616					53.4773	0.194601																						80.0903	0.15772	91.1326	0.248236	35.5834	0.120523			69.3707	0.213876	76.4486	0.108119
		50.0299	0.3198	96.1505	0.103625	86.1045	0.126891					58.6936	0.194417																						33.9265	0.154207	96.4027	0.247915	32.3079	0.119124			58.2872	0.211728	55.3122	0.107884
		100.991	0.319762	80.2079	0.103275	87.1054	0.126064					68.1956	0.193648																						18.653	0.154041	81.5331	0.247865	89.1469	0.11845			10.1777	0.210956	57.7596	0.107594
		124.642	0.31728	119.442	0.100986	61.0136	0.125118					74.4426	0.191674																						55.5981	0.152925	33.7841	0.247568	95.5071	0.118099			79.4076	0.210846	35.3731	0.10743
		23.7356	0.31518			89.7192	0.116695					83.952	0.187442																						63.3821	0.152184	25.3712	0.24754	38.0671	0.117965			88.9822	0.210072	74.6839	0.105765
		30.9762	0.310337			98.5661	0.114993					75.8263	0.185284																						48.9599	0.151772	32.0169	0.247461	59.1052	0.117938			51.3309	0.210065	119.141	0.105367
		67.8535	0.309705			71.1774	0.114298					93.2573	0.18378																						99.0287	0.150721	58.5688	0.247458	95.1448	0.117429			39.391	0.207682	31.6733	0.105089
		90.0198	0.308727			77.7324	0.114141					78.4871	0.183457																						56.7995	0.150397	20.2933	0.24598	53.4188	0.117259			28.3363	0.206797	62.3259	0.104704
		71.113	0.307043			98.7173	0.113979					65.7056	0.180058																						98.18	0.150316	90.5722	0.245888	94.12	0.1169			81.0275	0.205278	98.6307	0.104247
		36.6421	0.306495			44.0521	0.113926					78.9815	0.179286																						2.16226	0.149277	64.1396	0.245865	85.1465	0.11629			53.5936	0.203243	96.263	0.103861
		44.8761	0.305636			77.57	0.111302					63.8669	0.175201																						100.724	0.146402	108.257	0.245152	14.8621	0.115178			62.326	0.20171	76.5699	0.102927
		67.3886	0.304743			75.0475	0.110967					65.5304	0.172345																						6.71176	0.145264	39.2747	0.24487	117.977	0.113071			60.3948	0.200589
		71.5403	0.302682			99.685	0.110772					82.8178	0.171053																						25.1297	0.145057	50.1965	0.244713	86.7532	0.111574			52.2838	0.200329
		86.1537	0.299285			101.473	0.110645					78.5456	0.170862																						72.3652	0.143393	40.2448	0.243825	105.467	0.1099			94.0597	0.199008
		14.9525	0.293856			65.633	0.11041					68.9938	0.166303																						117.922	0.142841	17.6755	0.243156	80.71	0.109545			79.0724	0.198506
		75.6915	0.29347			66.052	0.107601					71.4757	0.164239																						109.954	0.142356	55.2041	0.24304	68.3729	0.106881			51.505	0.198187
		44.7929	0.293128			111.691	0.107475					56.2477	0.163253																						96.9646	0.142022	105.685	0.242989	98.7854	0.10617			67.0912	0.197068
		96.7573	0.292789			126.705	0.106005					79.5269	0.163208																						65.814	0.141646	15.1302	0.242577	110.763	0.105509			57.9893	0.193973
		31.7856	0.28993			44.4258	0.10509					77.5915	0.162399																						71.9246	0.141355	88.2329	0.24255	58.7912	0.103876			52.3517	0.193673
		32.626	0.289822			85.9166	0.104219					51.3842	0.158879																						29.5483	0.141008	50.1383	0.242379	80.1489	0.103552			82.9083	0.191335
		36.1971	0.287984			102.872	0.102976					12.8928	0.156933																						127.609	0.140624	72.3097	0.242294	65.28	0.101739			44.7873	0.190436
		43.7873	0.286161			119.483	0.101112					96.9364	0.15605																						98.3967	0.138859	32.4459	0.241937					49.9093	0.187346
		59.1279	0.284339			120.558	0.100479					67.8983	0.155436																						96.0735	0.137237	140.743	0.241062					73.5337	0.185722
		48.3481	0.281597									69.1682	0.155101																						2.35639	0.137154	100.899	0.24057					88.8573	0.184706
		137.106	0.276603									77.553	0.154874																						43.3963	0.135108	100.649	0.239039					63.3782	0.184615
		53.2773	0.271178									79.1507	0.154013																						6.12926	0.13452	45.9875	0.23852					62.3983	0.183936
		84.4452	0.270849									27.9129	0.15227																						10.4802	0.133147	107.997	0.237811					74.2208	0.180836
		129.954	0.266861									90.8205	0.14771																						53.5262	0.133018	26.1651	0.237759					96.0053	0.179552
		105.648	0.265301									75.6395	0.143919																						81.9258	0.132925	26.5361	0.237325					28.8861	0.178858
		92.534	0.260008									77.0284	0.143121																						97.3606	0.132155	77.0039	0.237108					43.1388	0.178173
		31.4891	0.257743									78.1124	0.141184																						93.2165	0.13193	77.6137	0.235295					84.6962	0.1765
		123.029	0.257076									59.5606	0.139107																						46.2712	0.1319	76.6911	0.235293					84.0074	0.176171
		58.4736	0.25577									93.046	0.137807																						115.912	0.13081	92.1021	0.234794					66.8955	0.17611
		90.0961	0.254031									78.7844	0.136687																						51.5949	0.130493	86.5485	0.234546					48.5703	0.175907
		36.7913	0.251817									53.8148	0.136676																						91.8106	0.130326	31.5619	0.234					74.8065	0.168381
		86.7909	0.250097									92.3538	0.136526																						40.3223	0.129886	50.5478	0.233546					91.1	0.166224
		130.216	0.247888									79.1504	0.132843																						98.54	0.129476	126.753	0.233236					63.6021	0.165278
		92.3929	0.241556									124.336	0.130801																						109.323	0.128948	70.2314	0.232211					29.7031	0.16372
		72.9251	0.241306									56.505	0.130581																						40.8481	0.128822	77.1583	0.230396					80.4478	0.163308
		81.7404	0.240212									67.5259	0.129274																						59.4358	0.128143	2.43242	0.23034					80.6981	0.161856
		45.8564	0.237109									93.8596	0.128351																						41.0598	0.128109	42.2159	0.228769					86.171	0.160751
		103.383	0.236096									103.157	0.125042																						85.8849	0.127996	59.2705	0.227659					78.5715	0.160298
		73.0405	0.229884									86.6788	0.1239																						29.4668	0.127778	47.5499	0.226674					68.4178	0.158933
		93.2529	0.228503									76.7693	0.122672																						26.5019	0.127682	24.4187	0.2255					80.4889	0.158273
		133.728	0.228165									78.7268	0.122294																						119.16	0.125692	94.0058	0.225136					79.2982	0.157434
		86.7207	0.227883									80.4038	0.121854																						80.6235	0.125506	54.4666	0.223964					73.1789	0.157417
		24.0296	0.226562									90.1134	0.120412																						61.2835	0.125125	67.0449	0.223517					93.0215	0.155685
		35.8553	0.226441									93.9737	0.119795																						130.444	0.124531	106.4	0.223115					73.6994	0.155356
		19.4421	0.225242									103.106	0.119122																						117.388	0.122975	49.2832	0.222138					75.3119	0.1538
		102.464	0.225125									45.444	0.118172																						109.006	0.122839	29.2832	0.221968					29.2115	0.153677
		117.064	0.224849									87.413	0.118134																						50.8961	0.121355	45.5667	0.221881					85.0586	0.151874
		61.7319	0.224812									100.356	0.118088																						28.2426	0.121144	127.941	0.22042					52.6393	0.150985
		47.5628	0.224272									86.296	0.115608																						59.1577	0.121107	33.4278	0.220043					82.2804	0.150829
		104.231	0.219866									76.062	0.113817																						92.2798	0.118619	34.9103	0.21946					106.329	0.148427
		47.0838	0.219648									75.9804	0.112106																						17.0644	0.117193	121.725	0.219273					62.6898	0.148222
		128.882	0.218596									82.1339	0.1114																						100.926	0.117035	51.7004	0.218387					80.0666	0.147438
		47.4904	0.214351									98.4494	0.109955																						104.715	0.115747	17.6368	0.218193					95.2306	0.145263
		127.557	0.212565									98.3063	0.109339																						68.2909	0.11516	46.6251	0.218041					42.8138	0.144987
		115.863	0.211318									76.4859	0.108427																						80.097	0.114394	28.2686	0.216887					57.1868	0.144503
		68.0866	0.211043									75.0794	0.105557																						124.392	0.113747	97.7881	0.216576					70.6747	0.144008
		119.33	0.208747									85.1086	0.104371																						55.0665	0.113741	99.5159	0.213781					64.2673	0.143765
		52.0597	0.208702									97.4452	0.103151																						85.44	0.113166	62.0149	0.212883					62.8284	0.142908
		106.755	0.206175									102.267	0.102232																						32.2951	0.112894	16.0469	0.212836					58.807	0.142851
		85.3009	0.205806									104.541	0.100143																						110.799	0.111893	22.5854	0.212081					75.9938	0.142196
		84.9737	0.201411																																57.7811	0.110694	57.5163	0.211855					83.7666	0.141942
		80.7511	0.199817																																13.8686	0.109668	97.9652	0.211034					73.043	0.140633
		94.0697	0.19961																																126.129	0.108356	66.6314	0.210774					80.3492	0.140573
		52.8304	0.198712																																129.992	0.107627	59.0052	0.210617					95.1612	0.139023
		103.294	0.198157																																28.4729	0.107399	92.4726	0.20996					87.6416	0.13653
		62.4712	0.197784																																72.7136	0.107171	95.7046	0.208753					23.661	0.136215
		52.9714	0.193881																																79.0765	0.106346	55.0863	0.20845					98.2816	0.135883
		87.7649	0.188264																																29.382	0.105839	14.1032	0.207772					70.3591	0.135871
		19.3791	0.185688																																36.1906	0.10522	131.701	0.207243					106.548	0.135544
		56.2588	0.183676																																68.7665	0.104784	69.8004	0.20622					25.6788	0.135437
		120.249	0.182501																																88.1747	0.104106	55.7207	0.205308					81.043	0.135369
		55.6738	0.182205																																29.5494	0.104002	58.2869	0.205073					78.6682	0.135086
		75.1452	0.181523																																68.5918	0.103775	100.565	0.204821					81.5718	0.134624
		102.992	0.180235																																130.517	0.103348	89.162	0.204175					45.4569	0.132905
		110.23	0.178648																																83.8881	0.103241	140.012	0.203312					81.0244	0.132347
		87.7153	0.178019																																120.598	0.102989	124.577	0.202667					112.692	0.131878
		46.4362	0.176921																																46.8449	0.102279	115.933	0.202393					87.2607	0.131705
		35.3193	0.174348																																55.9104	0.102265	89.8506	0.202356					80.7948	0.13153
		60.214	0.170455																																122.601	0.102218	132.081	0.20159					49.8888	0.131469
		28.8509	0.167085																																92.3594	0.101915	61.5304	0.19536					112.652	0.131428
		90.4471	0.16701																																19.4384	0.100672	108.42	0.194446					59.8296	0.131298
		76.3268	0.163059																																15.2901	0.100551	59.7017	0.193905					61.4667	0.131082
		132.619	0.162779																																112.343	0.100502	78.7869	0.193825					63.9283	0.130428
		66.3102	0.159397																																79.6871	0.100184	106.977	0.193669					72.6448	0.129865
		97.0504	0.156244																																26.6578	0.100169	79.7267	0.192725					57.8546	0.129512
		99.3869	0.155683																																113.082	0.100124	105.545	0.192423					55.8802	0.128755
		47.408	0.150322																																94.8633	0.100081	91.2135	0.191621					73.6605	0.128304
		133.638	0.142754																																81.1319	0.100081	43.7621	0.191606					100.946	0.12828
		58.428	0.141092																																		20.0542	0.191313					90.7062	0.128185
		118.364	0.136333																																		51.435	0.191264					86.4183	0.127339
		132.754	0.128959																																		25.9224	0.190918					114.922	0.124562
		108.493	0.125969																																		83.125	0.190439					100.091	0.123922
		135.353	0.125291																																		86.8497	0.190212					82.3503	0.123118
		54.5154	0.123277																																		21.3177	0.189822					76.4157	0.122048
		67.3029	0.121684																																		104.855	0.189443					62.4985	0.121328
		38.8346	0.120243																																		101.469	0.189208					41.8836	0.12001
		126.606	0.118455																																		12.5234	0.189045					109.729	0.11939
		106.755	0.116874																																		131.109	0.186015					66.3134	0.119363
		114.102	0.110871																																		87.0178	0.184532					62.6752	0.118237
		122.807	0.109402																																		118.933	0.183867					38.4427	0.117137
		56.5784	0.107152																																		47.9568	0.183499					32.3073	0.116598
																																					30.8593	0.182824					77.5474	0.115958
																																					100.875	0.182733					52.1208	0.113646
																																					70.0231	0.18149					92.9251	0.111668
																																					27.2521	0.180278					105.339	0.110999
																																					36.0294	0.180076					102.02	0.110464
																																					68.7435	0.179355					78.238	0.110231
																																					129.827	0.178706					105.532	0.110166
																																					119.243	0.178644					45.6262	0.109941
																																					26.3448	0.17712					74.3287	0.109849
																																					71.2495	0.177051					65.2092	0.106936
																																					107.473	0.175498					63.9592	0.106793
																																					106.799	0.175119					95.4604	0.10665
																																					83.7828	0.174892					63.5647	0.106479
																																					102.147	0.174305					92.0722	0.106228
																																					120.222	0.174078					76.3765	0.104032
																																					22.4628	0.173948					94.1265	0.103554
																																					78.4953	0.173075					110.004	0.103108
																																					44.1122	0.171155					80.1325	0.103107
																																					117.015	0.170799					60.8719	0.102477
																																					33.4632	0.169796					91.9748	0.102241
																																					140.462	0.169567					123.797	0.101557
																																					84.3469	0.169364					114.781	0.101379
																																					29.645	0.169248					88.0292	0.100633
																																					57.0636	0.168971
																																					59.9212	0.168891
																																					67.6127	0.168106
																																					111.438	0.167967
																																					133.865	0.167598
																																					9.17584	0.16755
																																					106.505	0.167212
																																					31.1267	0.167162
																																					64.6542	0.166071
																																					41.7209	0.16606
																																					12.317	0.165953
																																					127.764	0.165647
																																					122.482	0.164831
																																					104.619	0.164443
																																					57.7216	0.164087
																																					15.2871	0.163765
																																					83.9917	0.163108
																																					75.2297	0.163078
																																					61.7702	0.16274
																																					50.604	0.162683
																																					88.7259	0.161419
																																					120.544	0.161067
																																					121.763	0.159975
																																					95.6605	0.159949
																																					114.297	0.159222
																																					93.1746	0.158612
																																					47.0641	0.157896
																																					71.6565	0.157684
																																					127.79	0.156796
																																					117.614	0.155985
																																					98.1472	0.155276
																																					94.1228	0.155045
																																					98.6972	0.154593
																																					54.8575	0.154375
																																					61.0858	0.153122
																																					62.0234	0.152983
																																					122.465	0.152835
																																					59.2526	0.152524
																																					89.3083	0.152002
																																					20.0319	0.151948
																																					25.8197	0.151885
																																					45.1679	0.151498
																																					106.964	0.151064
																																					59.0704	0.151004
																																					125.999	0.149804
																																					83.3702	0.149634
																																					79.1521	0.149036
																																					72.5064	0.14712
																																					125.23	0.146793
																																					18.235	0.146763
																																					97.2127	0.145323
																																					107.151	0.144515
																																					135.42	0.144395
																																					136.7	0.144327
																																					131.69	0.143706
																																					104.739	0.143685
																																					139.839	0.142676
																																					62.4869	0.142449
																																					65.3585	0.142315
																																					93.8962	0.141048
																																					140.542	0.141031
																																					140.591	0.1409
																																					22.0699	0.140662
																																					74.9028	0.140615
																																					116.815	0.139009
																																					111.371	0.138624
																																					106.856	0.136132
																																					78.2997	0.136094
																																					63.6113	0.134977
																																					96.5657	0.134706
																																					124.435	0.134492
																																					74.6666	0.134288
																																					102.589	0.13335
																																					129.401	0.131834
																																					64.6479	0.131769
																																					135.173	0.131768
																																					97.8866	0.130173
																																					65.1198	0.130052
																																					47.6108	0.130037
																																					135.713	0.129928
																																					107.564	0.129242
																																					131.984	0.12886
																																					19.4925	0.128804
																																					66.2248	0.12861
																																					26.3415	0.128042
																																					101.587	0.126648
																																					134.933	0.124167
																																					45.3355	0.124077
																																					120.376	0.124076
																																					123.219	0.123717
																																					77.555	0.122403
																																					13.7762	0.121796
																																					120.958	0.121061
																																					84.9013	0.121027
																																					56.5691	0.120389
																																					141.435	0.119513
																																					28.1992	0.119148
																																					100.305	0.118968
																																					28.6126	0.118842
																																					34.1661	0.118401
																																					11.8259	0.117009
																																					91.2928	0.116235
																																					72.6507	0.115172
																																					46.8657	0.114705
																																					137.476	0.11437
																																					129.711	0.11389
																																					89.153	0.113103
																																					124.118	0.113042
																																					63.899	0.111978
																																					119.453	0.111416
																																					132.041	0.111098
																																					108.686	0.110975
																																					80.1966	0.110848
																																					94.2866	0.110679
																																					106.479	0.110651
																																					122.201	0.110245
																																					71.1995	0.109699
																																					74.5036	0.109356
																																					104.89	0.108879
																																					44.5094	0.108696
																																					133.256	0.108482
																																					56.9999	0.107713
																																					74.3555	0.106534
																																					25.693	0.105253
																																					91.5832	0.105063
																																					39.0301	0.103329
																																					139.379	0.10309
																																					93.033	0.10301
																																					85.7271	0.101909
																																					128.822	0.101892
																																					114.142	0.101865
																																					37.783	0.100774
																																					140.549	0.100008
[truncated: 53 more columns]
