# Supplementary material for: Zebrafish embryonic explants undergo genetically encoded self-assembly
Source: eLife. 2020 Apr 6;9:e55190. doi: 10.7554/eLife.55190 (PMC7190352; doi:10.7554/eLife.55190)
Supplement: Figure 2—figure supplement 2—source data 1. [file elife-55190-fig2-figsupp2-data1.xlsx]

## Sheet: Sheet1
Figure 2 - Supplement 2
C. Average distance of positive nuclei to clone centre
Time (min)
0	60	120
0.157944	0.158535	0.170087
0.121282	0.132987	0.141704
0.170469	0.172356	0.181917
0.111609	0.125831	0.115354
0.125174	0.133769	0.126284
0.139232	0.151945	0.129322
0.175231	0.16584	0.147623
0.212297	0.17206	0.188593
0.125236	0.13698	0.145569
0.158493	0.158116	0.184608
D. Average normalized distance between positive nuclei
Time (min)
0	60	120
0.231677	0.222939	0.237911
0.174083	0.188573	0.200116
0.237476	0.241091	0.255956
0.158223	0.173813	0.16171
0.179815	0.188474	0.181416
0.197326	0.211094	0.182516
0.248922	0.234138	0.211136
0.302745	0.239195	0.264224
0.179669	0.197228	0.205405
0.219451	0.222142	0.260238
