# Supplementary material for: Zebrafish embryonic explants undergo genetically encoded self-assembly
Source: eLife. 2020 Apr 6;9:e55190. doi: 10.7554/eLife.55190 (PMC7190352; doi:10.7554/eLife.55190)
Supplement: Figure 2—figure supplement 3—source data 1. [file elife-55190-fig2-figsupp3-data1.xlsx]

## Sheet: Sheet1
Figure 2 - Supplement 3
B. Percentage of explants showing normal, reduced or no sebox::EGFP expression at bud stage
						in %
	Present	Strongly reduced	Absent	Total		Present	Strongly reduced	Absent	Total			71.4286	14.2857	14.2857
Shield > Bud	20	4	4	28		71.4286	14.2857	14.2857	100			0	10	90
256c>Shield	0	2	18	20		0	10	90	100			0	16.6667	83.3333
256c>Bud	0	3	15	18		0	16.6667	83.3333	100			80	10	10
DMSO (256c>Bud)	16	2	2	20		80	10	10	100
C. Area of the sebox::EGFP-expressing domain
DMSO (256c>Bud)	256c>Bud	256c>Shield	Shield > Bud
30602.3	0	4862.93	52922.3
25432.7	0	0	46268.7
26272	0	7492.93	32020.9
32106.5	3072.22	0	15896.8
67498.6	0	0	38009.6
29428.3	0	0	30295.6
20624.2	0	0	26907.3
47112.6	0	0	32695.1
34353.5	0	0	22522.4
27780.8	2466.5	0	10045.1
59454.5	0	0	28486.2
39362.8	0	0	0
0	10853.2	0	21609.9
10820.5	0	0	24120
14814.6	0	0	13185.8
28556.3	0	0	0
21605.2	0	0	19230.6
34876.7	0	0	25755
10488.9		0	23617
0		0	8086.19
			0
			26857.4
			36620.7
			0
			9936.07
			47888.1
			33646.5
			3013.05
D.Area of the sebox::EGFP-expressing domain versus the normalized extension length
		Nodal inhibitor (SB-505124)
DMSO (256c>bud)		256c>Bud		256c>Shield		Shield>Bud
Area of sebox::EGFP-expressing domain	Normalized length (%)	Area of sebox::EGFP-expressing domain	Normalized length (%)	Area of sebox::EGFP-expressing domain	Normalized length (%)	Area of sebox::EGFP-expressing domain	Normalized length (%)
30602.3	39.2828	0	0	4862.93	0	52922.3	48.7339
25432.7	42.3595	0	0	0	0	46268.7	45.602
26272	33.311	0	0	7492.93	0	32020.9	41.3478
32106.5	44.1738	3072.22	0	0	0	15896.8	23.6056
67498.6	41.4736	0	0	0	0	38009.6	46.5259
29428.3	43.45	0	0	0	0	30295.6	28.2454
20624.2	30.4402	0	0	0	0	26907.3	43.6037
47112.6	40.7343	0	0	0	0	32695.1	41.6685
34353.5	40.1989	0	0	0	0	22522.4	37.085
27780.8	36.6506	2466.5	0	0	0	10045.1	32.1299
59454.5	40.3335	0	0	0	0	28486.2	37.3647
39362.8	42.6678	0	0	0	0	0	0
10820.5	30.234	10853.2	0	0	0	21609.9	38.6381
0	0	0	0	0	0	24120	34.7646
14814.6	25.5915	0	0	0	0	13185.8	33.0899
28556.3	42.0035	0	0	0	0	0	0
21605.2	35.0662	0	0	0	0	19230.6	34.282
34876.7	47.5226	0	0	0	0	25755	35.989
10488.9	29.3752			0	0	23617	39.684
0	24.5166			0	0	8086.19	20.378
						0	0
						26857.4	44.1948
						36620.7	34.511
						0	44.7598
						9936.07	35.3684
						47888.1	45.4838
						33646.5	28.3309
						3013.05	33.4423
