# Supplementary material for: Zebrafish embryonic explants undergo genetically encoded self-assembly
Source: eLife. 2020 Apr 6;9:e55190. doi: 10.7554/eLife.55190 (PMC7190352; doi:10.7554/eLife.55190)
Supplement: Figure 2—source data 1. [file elife-55190-fig2-data1.xlsx]

## Sheet: Sheet1
Figure 2
B. Percentage of pSmad2/3 positive nuclei
50% epiboly		Germ Ring		Shield
Embryo	Explant	Embryo	Explant	Embryo	Explant
34.3262	18.4758	38.6096	23.5772	25.0522	44.8637
61.5132	11.9581	42.1429	16.3082	16.9014	40.6542
58.8358	18.0751	48.495	36.166	24.1206	36.3636
62.1277	29.2969	20.2899	39.2796	10.9123	17.8637
47.7723	32	42.6423	24.5726	6.16798	50.457
34.1463	23.4513	55.0296	39.4309	39.2727	23.127
65.8103	16.9197	54.4662	12.4402		10.6965
	23.7981	30.3354	25		31.5011
	24.1706	57.7273	50.5376
	14.8571	48.2955	62.3239
C. Normalized intensity of brighest pSMAD2/3 nuclei
50% epiboly																		Germ Ring																					Shield
Embryo							Explant											Embryo										Explant											Embryo						Explant
0.507251	0.793473	1.44987	2.14923	0.891012	1.06158	1.65166	0.472316	0.883487	0.545628	0.585029	0.673972	1.28144	0.179055	0.670787	0.633346	0.375281		1.09893	2.00167	0.791951	0.832971	1.32107	0.590206	1.16926	0.383642	0.460009	0.489531	0.951156	0.477243	0.799678	1.17151	1.69724	2.42446	0.552728	0.523936	1.21585	0.803437		0.469156	0.276969	0.263415	0.264999	0.203323	0.478849	1.06994	1.69376	1.07251	1.32902	1.09366
0.475908	0.793032	1.28255	1.95993	0.827031	0.919382	1.45957	0.402489	0.843565	0.499263	0.534444	0.543508	1.19664	0.166121	0.474076	0.59196	0.186045		0.958383	1.10904	0.791336	0.781492	1.22585	0.580237	1.07362	0.362447	0.427425	0.452325	0.883505	0.26592	0.781298	1.15346	1.61911	1.90467	0.463715	0.465991	0.901139	0.71049		0.361404	0.246687	0.250681	0.195919	0.203098	0.457779	1.03701	1.68681	1.03908	0.859027	1.0267
0.450759	0.779265	1.22481	1.72967	0.726884	0.861779	1.37174	0.358884	0.774354	0.483446	0.517445	0.516419	0.922719	0.163318	0.471178	0.55489	0.174743		0.865159	1.03547	0.727867	0.77631	1.07996	0.559555	1.03384	0.348516	0.423431	0.404251	0.788027	0.261151	0.736272	0.990005	1.55021	1.54338	0.455172	0.404154	0.861918	0.691241		0.3407	0.245405	0.24291	0.181186	0.177978	0.425263	1.0335	1.64786	0.837441	0.853526	0.967499
0.443075	0.772304	1.21554	1.68945	0.725018	0.847796	1.33165	0.358264	0.646431	0.389248	0.498117	0.452822	0.8878	0.159045	0.438557	0.539898	0.172573		0.861073	0.87786	0.726436	0.752883	1.05423	0.506893	0.963184	0.319491	0.421003	0.393341	0.665369	0.244229	0.70203	0.984742	1.45915	1.44079	0.353743	0.384851	0.805206	0.686308		0.321918	0.240728	0.234473	0.179043	0.150712	0.419157	0.977638	1.52238	0.793499	0.764115	0.943696
0.37847	0.770321	1.15599	1.62629	0.714031	0.832952	1.26978	0.349149	0.639064	0.385951	0.480576	0.328384	0.786167	0.158385	0.405763	0.501693	0.171393		0.838338	0.768463	0.691365	0.733256	1.01009	0.503673	0.961074	0.313189	0.415594	0.386928	0.663032	0.224853	0.65825	0.964441	1.36665	1.33096	0.287757	0.378467	0.773015	0.685075		0.290651	0.223223	0.233405	0.178862	0.149273	0.402608	0.973239	1.43697	0.768815	0.678841	0.911371
0.372778	0.766987	1.09263	1.58975	0.707569	0.822118	1.25691	0.348175	0.553705	0.359836	0.467869	0.327782	0.760082	0.158	0.401555	0.376631	0.157409		0.827263	0.768382	0.685676	0.731291	0.991137	0.496805	0.958907	0.295962	0.415176	0.379939	0.552758	0.217807	0.634409	0.948911	1.342	1.31366	0.269526	0.366456	0.749155	0.682694		0.288554	0.218456	0.23307	0.17275	0.148705	0.391721	0.895683	1.36168	0.764909	0.648962	0.895378
0.372247	0.766794	1.0819	1.49014	0.70682	0.816356	1.22339	0.347965	0.518065	0.347748	0.466062	0.324859	0.727616	0.156799	0.383625	0.374478	0.153894		0.804912	0.732416	0.558716	0.724485	0.963306	0.48191	0.946815	0.290104	0.402243	0.372006	0.54555	0.207588	0.633981	0.915132	1.32987	1.03898	0.22966	0.36194	0.696382	0.676154		0.266146	0.210476	0.231079	0.168937	0.146228	0.381598	0.878283	1.2952	0.736596	0.632809	0.893283
0.370038	0.76605	1.07371	1.45231	0.695418	0.743877	1.1929	0.335747	0.489178	0.328167	0.424739	0.302488	0.682656	0.154765	0.37421	0.330003	0.153781		0.782381	0.731784	0.527435	0.722302	0.951224	0.462461	0.935453	0.289407	0.39898	0.368389	0.523808	0.203555	0.61582	0.903664	1.27677	0.997386	0.213138	0.309243	0.693763	0.674879		0.260066	0.205005	0.224638	0.161499	0.144409	0.378072	0.854095	1.27853	0.729953	0.600439	0.892352
0.369692	0.764272	1.04802	1.43439	0.660075	0.707193	1.17089	0.333434	0.474515	0.321512	0.389798	0.286216	0.594084	0.151151	0.362943	0.313969			0.777677	0.725338	0.517814	0.708098	0.951023	0.447938	0.898543	0.287095	0.394838	0.365735	0.497069	0.194825	0.607304	0.899308	1.25103	0.960108		0.301648	0.679546	0.663898		0.235089	0.204599	0.223429	0.16081	0.143718	0.376588	0.850987	1.25353	0.718938	0.576333	0.892015
0.361094	0.763254	1.04167	1.42901	0.631143	0.665363	1.16836	0.326113	0.450486	0.31967	0.381511	0.280309	0.573485	0.150629	0.360267	0.268656			0.747685	0.706455	0.500271	0.697827	0.93475	0.445474	0.896273	0.280581	0.39383	0.362257	0.48915	0.192302	0.603069	0.895912	1.23889	0.954557		0.294752	0.636719	0.661095		0.233693	0.204092	0.223373	0.158731	0.14185	0.363062	0.830674	1.186	0.716787	0.571425	0.872187
0.35734	0.759075	0.983224	1.41474	0.613118	0.657599	1.13848	0.325555	0.43878	0.304884	0.360622	0.277594	0.567716	0.149097	0.358592	0.266326			0.727572	0.685964	0.499674	0.678536	0.929778	0.435309	0.87511	0.2794	0.390374	0.358658	0.488303	0.190077	0.576027	0.873578	1.22147	0.935864		0.290895	0.592175	0.657476		0.232911	0.203675	0.218719	0.158641	0.141056	0.350007	0.819632	1.16688	0.714713	0.562845	0.861383
0.352729	0.751553	0.982715	1.38692	0.61253	0.655529	1.13534	0.286463	0.423471	0.287795	0.351807	0.275545	0.519513	0.148436	0.353482	0.259862			0.718191	0.644409	0.494823	0.66957	0.925748	0.426546	0.870227	0.27407	0.390225	0.344843	0.485002	0.186138	0.574688	0.862772	1.16012	0.913409		0.28549	0.590282	0.655757		0.231833	0.189774	0.217303	0.157205	0.134194	0.344509	0.800693	1.15877	0.707938	0.561247	0.850165
0.347383	0.750012	0.977547	1.29065	0.610993	0.645713	1.12428	0.271154	0.419976	0.286756	0.337574	0.268051	0.473878	0.144263	0.353233	0.258757			0.706531	0.641041	0.490323	0.668207	0.905202	0.426229	0.869832	0.266533	0.386801	0.342296	0.439717	0.182877	0.572701	0.857647	1.13056	0.913182		0.27558	0.584377	0.652457		0.222268	0.183244	0.214531	0.155249	0.13353	0.343924	0.771372	1.13998	0.707017	0.560147	0.843157
0.34341	0.748527	0.933023	1.22413	0.60473	0.631202	1.11707	0.258563	0.400867	0.277742	0.331106	0.262824	0.424195	0.142492	0.34827	0.247558			0.692939	0.632676	0.489338	0.655675	0.903185	0.425255	0.867026	0.262546	0.380313	0.33064	0.428276	0.179605	0.562433	0.822205	1.13004	0.906802		0.269757	0.577752	0.651757		0.220979	0.182818	0.212659	0.154516	0.131694	0.342149	0.76294	1.1169	0.6735	0.503919	0.839937
0.342968	0.746122	0.928742	1.21836	0.601517	0.620395	1.09733	0.252862	0.394345	0.277553	0.322821	0.255161	0.408791	0.142073	0.342344	0.247506			0.675314	0.627527	0.470164	0.619092	0.871756	0.419317	0.865944	0.259511	0.374839	0.329225	0.4244	0.174222	0.558681	0.817979	1.11991	0.891309		0.266907	0.574812	0.638573		0.219802	0.182111	0.210274	0.152156		0.342087	0.755516	1.10406	0.669988	0.499266	0.839555
0.339775	0.742616	0.921439	1.1855	0.594452	0.584823	1.09128	0.24499	0.392255	0.258786	0.299649	0.252492	0.394783	0.139902	0.323731				0.646865	0.627006	0.464313	0.617436	0.858968	0.41928	0.864517	0.259004	0.372886	0.322327	0.417361	0.169982	0.546589	0.808944	1.03138	0.874693		0.262879	0.574527	0.629078		0.219193	0.176143	0.210149	0.151902		0.337323	0.747883	1.09932	0.665476	0.491973	0.83467
0.339686	0.742269	0.915241	1.16194	0.586848	0.582669	1.08204	0.244903	0.389294	0.256759	0.295259	0.24753		0.137731	0.321436				0.64522	0.600822	0.459891	0.600247	0.851279	0.418209	0.855902	0.257489	0.365764	0.322081	0.385436	0.168868	0.543483	0.779812	1.01422	0.856974		0.253517	0.539228	0.61175		0.209764	0.170661	0.208192	0.145927		0.330546	0.728991	1.0634	0.664765	0.491765	0.83219
0.326284	0.739836	0.901105	1.16193	0.585254	0.579381	1.05917	0.244469	0.386607	0.256032	0.292151	0.24498		0.137409	0.320976				0.630058	0.596102	0.443094	0.59739	0.841441	0.416644	0.855778	0.256844	0.365342	0.320722	0.383488	0.166246	0.54308	0.767427	0.989972	0.82083		0.253318	0.530689	0.611453		0.20928	0.170003	0.206127	0.145799		0.329189	0.723649	1.06086	0.657583	0.480927	0.83117
0.319621	0.736446	0.897342	1.12792	0.584808	0.557431	1.05627	0.24354	0.372795	0.255671	0.281374	0.242005		0.133231	0.319835				0.572949	0.585829	0.440813	0.593138	0.84125	0.415597	0.850831	0.256653	0.363612	0.319703	0.381988	0.163325	0.539217	0.762309	0.974083	0.796701		0.252954	0.524552	0.602941		0.209275	0.169986	0.20529			0.328561	0.707343	1.06061	0.657453	0.457069	0.829947
0.318797	0.735854	0.895508	1.11891	0.57783	0.556529	1.04539	0.243502	0.370884	0.254515	0.272228	0.23646		0.132493	0.318776				0.569266	0.580987	0.428281	0.582865	0.831074	0.410753	0.845734	0.254621	0.363543	0.315035	0.36942	0.163114	0.538765	0.754918	0.962902	0.777787		0.251558	0.521767	0.577427		0.207597	0.168482	0.202896			0.327398	0.706264	1.05967	0.655097	0.446225	0.829001
0.314518	0.733566	0.880263	1.07968	0.576834	0.530433	1.0438	0.232974	0.36497	0.241883	0.269365	0.22612		0.131825	0.317678				0.565324	0.572351	0.420689	0.573354	0.8256	0.408741	0.845588	0.254058	0.36169	0.313552	0.350087	0.160849	0.527394	0.74724	0.883793	0.771836		0.250381	0.519047	0.576231		0.207266	0.167881	0.199358			0.323321	0.701527	1.05052	0.651325	0.445779	0.82475
0.309334	0.7331	0.874567	1.06676	0.575597	0.515165	1.03487	0.231498	0.340095	0.238375	0.268286	0.220146		0.131382	0.312344				0.564752	0.553301	0.419957	0.56884	0.821286	0.408712	0.842986	0.253629	0.356931	0.310184	0.346917	0.159491	0.526445	0.738426	0.845908	0.762599		0.248592	0.509028	0.572678		0.206775	0.167437	0.199165			0.321408	0.696569	1.01208	0.643069	0.434682	0.809485
0.30481	0.730696	0.873484	1.06069	0.56695	0.502342	1.03306	0.229476	0.332391	0.230177	0.265342	0.210864		0.128007	0.305657				0.564681	0.552656	0.419281	0.556065	0.814739	0.408412	0.803646	0.252247	0.352417	0.306639	0.344299	0.15836	0.52521	0.725916	0.839658	0.755783		0.248454	0.508713	0.569695		0.205449	0.166544	0.198785			0.315426	0.690061	0.985075	0.639478	0.39101	0.809071
0.303411	0.729943	0.871016	1.05499	0.56532	0.499277	1.03269	0.219845	0.31229			0.206442			0.304612				0.551322	0.550821	0.412711	0.548269	0.813067	0.407859	0.800217	0.244993	0.351505	0.305165	0.317802	0.154993	0.523792	0.720611	0.770143	0.736039		0.239173	0.500786	0.567791		0.202378	0.165566	0.19627			0.313793	0.68863	0.962689	0.639107	0.385187	0.808807
0.303259	0.728291	0.864706	1.04999	0.552393	0.492562	1.03069					0.201643			0.302073				0.550161	0.550117	0.40987	0.532343	0.753352	0.404895	0.797157	0.244434	0.344121	0.304771	0.316672	0.154294	0.515963	0.718512	0.749789	0.671802		0.236792	0.496471	0.552498		0.194356	0.164611	0.195929			0.312278	0.67838	0.940817	0.633456	0.381212	0.807424
0.297936	0.727781	0.849224	1.01904	0.551751	0.489896	1.02492					0.200734			0.299612				0.550057	0.549324	0.391633	0.531582	0.733343	0.404444	0.790227	0.243026	0.341682	0.304691	0.305838	0.15386	0.514593	0.705604	0.731096	0.655719		0.236353	0.49334	0.549721		0.193386		0.195362			0.311792	0.676999	0.928969	0.630335	0.376283	0.807387
0.294516	0.720671	0.832506	1.00972	0.540115	0.485831	1.0191					0.19395			0.297305				0.531083	0.545988	0.387698	0.514185	0.727564	0.404214	0.787798	0.242292	0.340885	0.304348		0.151689	0.510705	0.690204	0.729897	0.651642		0.235268	0.487013	0.547288		0.193235		0.195301			0.305883	0.669748	0.922285	0.626114	0.372907	0.793643
0.29421	0.719615	0.83017	1.00802	0.538726	0.481467	1.00817					0.189028			0.297176				0.525586	0.545098	0.386056	0.510988	0.72133	0.400117	0.784023	0.241819	0.340457	0.303912			0.501361	0.687593	0.728956	0.637325		0.234644	0.481096	0.543299		0.191973		0.192066			0.304632	0.669098	0.918503	0.625039	0.33644	0.790955
0.293358	0.716683	0.824062	0.993053	0.535487	0.472627	0.999566					0.188649			0.29434				0.524062	0.541578	0.385314	0.510935	0.71381	0.396935	0.765726	0.240941	0.33997	0.303811			0.487096	0.677649	0.695421	0.600167		0.229065		0.541602		0.190971		0.191837			0.298729	0.668631	0.914664	0.624225	0.327846	0.782622
0.291055	0.715515	0.805561	0.981004	0.527761	0.468919	0.997499					0.182952			0.292223				0.519534	0.541023	0.379028	0.509766	0.711261	0.394246	0.764965	0.237767	0.33841	0.303607			0.484815	0.663143	0.683027			0.225675		0.539607		0.189359		0.18949			0.296865	0.65529	0.911902	0.622367		0.778565
0.289573	0.715482	0.795429	0.955193	0.526759	0.464506	0.985054					0.178513							0.518421	0.540985	0.372964	0.49794	0.701894	0.393339	0.741736	0.236513	0.337578	0.303062			0.478629	0.65646	0.662088			0.218784		0.536641		0.186033		0.189415			0.295975	0.639171	0.908342	0.613492		0.775484
0.285751	0.711824	0.788368	0.954341	0.526224	0.462929	0.978059					0.175898							0.499112	0.537569	0.370385	0.493839	0.697164	0.39102	0.732639	0.235366	0.337349	0.302422			0.476425	0.65381	0.649114					0.535855		0.184393		0.189057			0.294558	0.638423	0.906626	0.612602		0.771041
0.282503	0.710059	0.781823	0.952581	0.522939	0.461506	0.975254					0.175873							0.496986	0.536745	0.369538	0.490076	0.691037	0.388831	0.712334	0.233046	0.336556	0.302243			0.474836	0.651047	0.64749					0.535683		0.181768		0.187836			0.294217	0.629863	0.896933	0.608887		0.764644
0.281162	0.709927	0.758764	0.9296	0.509493	0.457183	0.974247					0.175569							0.496096	0.536627	0.369022	0.486165	0.690393	0.38533	0.703343	0.232874	0.336519	0.300902			0.468367	0.635306	0.624871					0.533061		0.180839		0.184313			0.293982	0.612942	0.886239	0.608662		0.761667
0.280031	0.705101	0.751879	0.929598	0.50391	0.44772	0.966387												0.494298	0.53595	0.364824	0.477917	0.684283	0.384458	0.702575	0.232195	0.336449	0.299545			0.467277	0.628635	0.613806					0.529643		0.180043		0.184194			0.291766	0.61132	0.868035	0.604782		0.756105
0.274164	0.703582	0.737736	0.926982	0.502769	0.446847	0.964952												0.488009	0.518019	0.363801	0.477087	0.679456	0.382229	0.692312	0.231693	0.336003	0.298711			0.453973	0.619321						0.523827		0.176645		0.184092			0.291764	0.61078	0.85064	0.602369		0.747789
0.273852	0.702868	0.732696	0.924828	0.497913	0.445503	0.964696												0.485334	0.518011	0.36217	0.469007	0.678901	0.378993	0.683891	0.230853	0.330492	0.298381			0.447788	0.613641						0.518566				0.182107			0.291002	0.608149	0.847627	0.600705		0.747556
0.272149	0.699574	0.731247	0.914899	0.490005	0.440208	0.960501												0.482093	0.514093	0.361618	0.452745	0.678717	0.377819	0.67818	0.230235	0.330319	0.29539			0.442979	0.61286						0.516152				0.181061			0.290433	0.602694	0.838474	0.59162		0.746357
0.271375	0.698724	0.728034	0.876329	0.484156	0.43844	0.957669												0.478464	0.512334	0.360659	0.451549	0.668081	0.373756	0.670982	0.229165	0.327773	0.294369			0.436101	0.608806						0.512839				0.180541			0.289803	0.596429	0.832488	0.574685		0.746033
0.269682	0.6967	0.714788	0.870635	0.482979	0.43398	0.952257												0.47455	0.512213	0.359694	0.450512	0.66574	0.371513	0.666114	0.228746	0.326068	0.292846			0.421928	0.603615						0.51043				0.180261			0.286264	0.594054	0.831994	0.574527		0.740742
0.269479	0.695389	0.70829	0.865852	0.481578	0.420002	0.936499												0.4745	0.510367	0.358089	0.448441	0.6615	0.369875	0.662736	0.22624	0.324607	0.292559			0.42047	0.593882						0.506346				0.179558			0.285314	0.591226	0.831555	0.572544		0.737442
0.266995	0.69371	0.700596	0.851347	0.469118	0.412165	0.934522												0.471279	0.50635	0.356663	0.443939	0.658486	0.364256	0.654914	0.226135	0.323061	0.292506			0.413515	0.59005						0.503467				0.179353			0.284929	0.574482	0.828348	0.569008		0.735552
0.265294	0.693672	0.697107	0.851059	0.460658	0.405424	0.917003												0.470823	0.499794	0.353362	0.443788	0.653045	0.362981	0.65057	0.224721	0.320382	0.291482			0.410156	0.587029						0.503443				0.178225			0.284443	0.573396	0.822585	0.560231		0.732096
0.263161	0.691254	0.696478	0.847315	0.455823	0.402628	0.912515												0.469674	0.499296	0.349443	0.434218	0.64834	0.362321	0.648073	0.222831	0.31889	0.290828			0.409505	0.581892						0.499676							0.28401	0.5701	0.819485	0.556754		0.729891
0.261795	0.690888	0.691811	0.834445	0.453963	0.399875	0.898905												0.469353	0.497301	0.347944	0.427454	0.644691	0.360334	0.631242	0.222027	0.318412	0.289409			0.40742	0.577837						0.497428							0.283799	0.567211	0.811887	0.554644		0.726468
0.259338	0.689481	0.663699	0.834439	0.451351	0.396604	0.896604												0.469203	0.493231	0.340114	0.421251	0.632283	0.359382	0.630197	0.221626	0.31667	0.288834			0.405982	0.569554						0.488035							0.283547	0.565682	0.796185	0.540974		0.724864
0.258562	0.689289	0.652371	0.823623	0.448305	0.395734	0.893506												0.468835	0.493136	0.339123	0.419003	0.631098	0.359267	0.62071	0.220303	0.316208	0.288693			0.404608	0.565831						0.481374							0.283369	0.555644	0.790682	0.535866		0.721857
0.258117	0.688413	0.640018	0.812767	0.446654	0.395407	0.890753												0.460704	0.492665	0.338789	0.415846	0.627166	0.356669	0.620508	0.220114	0.31609	0.287902			0.40313	0.552964						0.475438							0.283254	0.551394	0.790573	0.528331		0.721147
0.256627	0.686722	0.631344	0.804621	0.43782	0.394989	0.883217												0.460675	0.489591	0.335548	0.413388	0.625608	0.355225	0.611652	0.21785	0.314462	0.287546			0.402916	0.550964						0.475233							0.282594	0.544619	0.782833	0.52336		0.721016
0.25586	0.685737	0.630158	0.793262	0.436632	0.388929	0.878028												0.451203	0.488823	0.335507	0.412299	0.618875	0.353228	0.601706	0.214315	0.314305	0.287338			0.402623	0.537424						0.473644							0.279102	0.542657	0.775189	0.523252		0.720647
0.251344	0.685321	0.622096	0.793074	0.43619	0.387426	0.863736												0.443686	0.488794	0.333538	0.410171	0.617681	0.349579	0.59705	0.209859	0.313995	0.28599			0.395651	0.532375						0.471948							0.278854	0.539897	0.7722			0.704373
0.250968	0.680928	0.619907	0.785931	0.433793	0.381295	0.855117												0.44153	0.484734	0.330817	0.408299	0.6143	0.343821	0.593545	0.208068	0.310416	0.283865			0.395202	0.530245						0.471053							0.278015	0.538706	0.764612			0.704169
0.248271	0.680808	0.619584	0.785706	0.423444	0.37967	0.854068												0.440063	0.477551	0.330533	0.404237	0.60373	0.340552	0.568966	0.20734	0.306597	0.283564			0.394771	0.513807						0.469162							0.275962	0.533754	0.747368			0.701786
0.247604	0.678202	0.61887	0.78042	0.423256	0.372896	0.842008												0.435505	0.476577	0.329885	0.401932	0.601457	0.340422	0.559353	0.206583	0.306414	0.283449			0.393971	0.512588													0.275225	0.532462	0.738794			0.691739
0.24437	0.677205	0.613321	0.779999	0.421307	0.36959	0.836339												0.429846	0.471886	0.329336	0.401873	0.59681	0.33659	0.55254	0.206313	0.306042	0.282089			0.390969	0.511326													0.272309	0.519005	0.716936			0.683092
0.24412	0.672263	0.593455	0.779467	0.416228		0.834026												0.42641	0.471129	0.328753		0.585908	0.335634	0.551362	0.206041	0.304428	0.281765				0.502357													0.271748	0.512377	0.710614			0.68291
0.242572	0.669453	0.587941	0.777051	0.409882		0.832104												0.42641	0.46642	0.326668		0.582656	0.334953	0.550714	0.204376	0.303662	0.281376				0.501685													0.271079	0.512261	0.707818			0.682432
0.239725	0.667951	0.582416	0.771101	0.400919		0.831074												0.422574	0.465907	0.325472		0.580433	0.332862	0.550177	0.202917	0.302825	0.28131				0.493524													0.269049	0.507484	0.694743			0.680631
0.238175	0.664438	0.574219	0.76124			0.819465												0.421682	0.462672	0.323636		0.571816	0.331807	0.549778	0.202632	0.302511	0.281095				0.483727													0.268141	0.500768	0.678422			0.680546
0.235596	0.661999	0.554395	0.757101			0.816524												0.409057	0.461909	0.323519		0.569775	0.331507	0.547439	0.201673	0.302498	0.280211				0.480716													0.267972	0.499082	0.675738			0.679262
0.234883	0.661846	0.546707	0.754256			0.814748												0.408266	0.45807	0.317194		0.566898	0.331077	0.546581		0.302418	0.277921				0.480571													0.266426	0.494131	0.669261			0.678737
0.233873	0.660674	0.540579	0.750152			0.808092												0.407681	0.456963	0.315778		0.564429	0.322688	0.545153		0.301647	0.277109				0.480227													0.2662	0.493104	0.667685			0.676164
0.23175	0.66006	0.5372	0.748264			0.800315												0.40544	0.453549	0.313598		0.559307	0.322293	0.543228		0.301611	0.276032				0.475995													0.266126	0.49137	0.648563			0.667782
0.22759	0.659841	0.536585	0.730979			0.796588												0.40379	0.451528	0.312923		0.557316	0.321923	0.54237		0.299874	0.275598				0.472564													0.265535	0.489094	0.638724			0.667381
0.227423	0.657652	0.534564	0.71592			0.793409												0.403197	0.450518	0.310692		0.555851	0.321844	0.537038		0.299534	0.273363				0.467577													0.264713		0.635961			0.659916
0.227411	0.656426	0.531692	0.71541			0.788326												0.402756	0.449166	0.309182		0.553757	0.321187	0.536312		0.298948	0.271235				0.449524															0.635117			0.657436
0.223076	0.64821	0.530782	0.715204			0.780219												0.400492	0.448613	0.307123		0.5472	0.31943	0.534928		0.298322	0.270597				0.431039															0.633403			0.651774
0.222983	0.644255	0.518224	0.71006			0.77597												0.399895	0.448332	0.306046		0.540722	0.318371	0.532625		0.298161	0.268661				0.427355															0.624291			0.649394
0.219538	0.643744	0.515611	0.688155			0.767949												0.398604	0.446603	0.304044		0.53951	0.317277	0.530688		0.297987	0.26838				0.421279															0.623882			0.644697
0.21776	0.642019	0.507071	0.684891			0.756997												0.395905	0.445679	0.296192		0.53831	0.316908	0.52983		0.297696	0.267282																			0.616025			0.64351
0.216088	0.641496	0.495986	0.674422			0.743884												0.390907	0.442466	0.296021		0.536135	0.316224	0.528263		0.297303	0.263632																			0.611794			0.639644
0.213803	0.640558	0.495377	0.673737			0.740682												0.389944	0.439916	0.295845		0.533718	0.315783	0.527997		0.296787	0.263144																			0.602804			0.636414
0.212896	0.640015	0.494204	0.670294			0.737356												0.388883	0.439035	0.294856		0.531162	0.315492	0.52635		0.296514	0.262568																			0.598749			0.634755
	0.638917	0.493484	0.662168			0.729677												0.388782	0.438371	0.293113		0.528861	0.315401	0.522412		0.294637	0.262239																			0.595701			0.633901
	0.637105	0.487922	0.655617			0.726247												0.387065	0.434939	0.291701		0.527568	0.315264	0.515988		0.293622	0.261043																			0.587096			0.630172
	0.636857	0.481611	0.653604			0.724662												0.384701	0.432505	0.290271		0.526897	0.315205			0.292787	0.257787																			0.580116			0.622815
	0.636366	0.473898	0.652414			0.723835												0.378556	0.432066	0.29003		0.524627	0.313743				0.256303																			0.577224			0.621487
	0.63604	0.472211	0.649964			0.722483												0.377073	0.430435	0.288877		0.521916	0.313193																							0.570766			0.615612
	0.631755	0.470773	0.648859			0.722252												0.376691	0.430052	0.286139		0.520982	0.312809																										0.615172
	0.631331	0.465387	0.644767			0.720699												0.375839	0.429886	0.283345		0.51582	0.312525																										0.60657
	0.629958	0.458936	0.644044			0.720294												0.372317	0.429543	0.282023		0.513832	0.3123																										0.604844
	0.629352	0.455066	0.639547			0.71923												0.368997	0.428834	0.282021		0.512761	0.310292																										0.604799
	0.628517	0.452712	0.635818			0.707372												0.367212	0.428303	0.279128		0.509905	0.309645																										0.603421
	0.624458	0.446845	0.634564			0.704387												0.366908	0.427641	0.277323		0.50931	0.307441
	0.623902	0.446071	0.629952			0.702205												0.365522	0.426995	0.275239		0.505747
	0.621919		0.627785			0.70059												0.365117	0.424806	0.275152		0.504513
	0.621481		0.623833			0.696307												0.364354	0.424581	0.274893		0.504253
	0.620043		0.621838			0.69361												0.363886	0.422447			0.502147
	0.615095					0.686995												0.36316	0.420504			0.501937
	0.614795					0.685221												0.362781	0.418523			0.498489
	0.607532					0.683563												0.361133	0.418089			0.496952
	0.602486					0.681615												0.360971	0.41799			0.489274
	0.602332					0.670148												0.360613	0.417713			0.487901
	0.600763					0.661645												0.360396	0.416767			0.484009
	0.598928					0.660252												0.358876	0.416119			0.482783
	0.592999					0.656146												0.358826	0.414277			0.48046
	0.591972					0.653856												0.358301	0.412145			0.47878
	0.59167					0.649527												0.354623	0.411156			0.473912
	0.589748					0.647853												0.351477	0.408406			0.472706
	0.586913					0.64542												0.350882	0.407613			0.472082
	0.585731																	0.35021	0.407194			0.467774
	0.584879																	0.349464	0.405428			0.465863
	0.582012																	0.348808	0.404706			0.464809
	0.581171																	0.348526	0.40378			0.464559
	0.579415																	0.343237	0.403699			0.463878
	0.578589																	0.342523	0.403467			0.463121
	0.571658																	0.339732	0.401576			0.46293
	0.570488																	0.33746	0.401292			0.461876
	0.569186																		0.400069			0.461169
	0.56607																		0.397265			0.460792
	0.565127																		0.396725			0.460169
	0.559639																		0.396083			0.46016
																			0.396056			0.459594
																			0.390145			0.459298
																			0.388963			0.455148
																			0.387816			0.453628
																			0.384813			0.451113
																			0.384064			0.448162
																			0.381631			0.447343
																			0.381321
																			0.380114
																			0.380084
																			0.376747
																			0.375895
																			0.375558
																			0.375411
																			0.375399
																			0.372641
																			0.372305
																			0.371796
																			0.370945
																			0.37079
																			0.369078
																			0.368656
																			0.368364
																			0.367656
																			0.367181
																			0.365737
																			0.364716
																			0.359674
																			0.359296
																			0.356565
																			0.355904
																			0.355883
																			0.355232
																			0.35355
																			0.35106
																			0.349643
																			0.349479
																			0.348395
																			0.348332
																			0.346219
																			0.346173
																			0.343603
																			0.343112
																			0.342712
																			0.341558
																			0.341158
																			0.340724
D. Cell tier of brightest nuclei to YSL/wounding site
50% epiboly																		Germ Ring																					Shield
Embryo							Explant											Embryo										Explant											Embryo						Explant
5.82942	5.95048	21.947	11.6125	7.71591	19.4541	16.1508	111.378	127.152	56.739	49.7014	44.5769	37.048	55.0806	52.4569	31.3891	5.63686		33.1289	21.414	17.1843	49.3503	8.61446	26.1462	15.3951	5.65519	37.4876	23.1413	65.2466	18.2794	27.19	37.5383	66.6422	18.1199	102.435	11.882	61.8744	11.6253		121.012	4.47959	21.5994	5.21699	17.9678	25.2674	8.85427	64.6552	52.5196	37.3921	10.6795
22.1138	19.2268	7.86928	16.624	7.92519	32.1645	36.3866	45.6556	110.871	126.533	44.7943	35.3012	10.0028	65.4541	39.0022	22.9827	102.547		19.0838	36.1798	26.073	126.549	11.1577	5.60608	16.0898	35.2942	6.5639	5.882	12.2923	24.4807	116.704	12.3804	45.6591	39.3014	80.3445	30.7377	14.4078	42.6919		103.655	59.2303	21.0788	32.5958	8.69537	40.8201	22.6311	19.907	91.4606	88.5076	21.3234
19.2356	19.8144	14.0043	9.96214	0	24.3164	15.3723	111.007	91.6968	96.4686	57.6666	62.4434	65.1635	9.14376	40.8821	33.1824	56.6506		25.2211	25.9039	6.40795	28.2972	15.2323	10.9397	24.993	27.09	48.24	7.23098	67.9271	6.30739	32.9385	50.9902	81.4401	11.3453	77.0082	25.9957	48.4956	61.2124		118.068	0.978598	15.3755	35.1549	26.6153	13.4693	62.8518	47.9991	42.8267	46.8539	19.5864
22.1693	13.5512	15.7589	4.42281	5.15657	27.1952	33.3503	50.7476	114.683	41.7775	0	78.3374	4.62454	55.6147	33.9951	41.2551	43.1237		6.7047	33.7719	0	90.2915	14.902	28.9808	19.7514	36.8212	18.6732	19.7424	14.6883	46.1407	46.1567	60.0193	48.482	13.9076	50.8221	16.9497	51.8685	37.0719		85.9276	3.26071	36.2646	5.5338	7.63911	31.053	21.8845	43.7428	96.3573	80.1589	25.8063
5.11664	24.7222	11.5604	15.2085	14.8701	25.0678	28.3257	47.5211	105.127	70.9692	55.0982	4.63681	54.2142	73.9888	59.6549	57.1037	44.1804		10.6014	47.6514	5.56188	105.882	0	34.6096	20.4125	24.6725	51.7752	9.13783	58.8092	5.73721	121.253	7.65418	55.0559	81.6126	46.17	5.10665	0	21.0556		115.027	12.2509	0.689176	13.4793	3.44048	20.2968	45.9391	66.2131	100.781	22.0028	11.2234
31.5586	6.97112	9.42083	14.6024	12.5861	25.7708	15.8881	31.6134	128.401	28.1344	32.0285	84.8546	115.171	24.112	37.2702	65.3781	89.0211		4.02965	17.0299	9.38216	27.5305	14.3474	7.59798	19.7109	12.7352	20.0761	15.083	74.388	62.0735	72.3431	53.5485	57.9098	58.2343	27.5874	27.1701	21.2117	30.9757		46.9611	9.14437	7.30631	6.23742	20.2962	14.7709	24.81	76.0022	68.3464	70.0722	17.4386
15.0953	6.71121	14.7792	14.9229	19.4195	19.7165	15.2667	105.63	126.037	44.2636	20.7396	83.5446	0.627606	79.4613	43.0715	91.31	37.541		28.1498	41.0076	11.5416	81.9883	8.71212	47.9526	32.1328	18.7668	33.6372	19.7259	32.2285	39.3863	91.7715	64.6663	62.0203	61.759	101.384	37.6426	44.8029	21.0434		21.0797	4.61332	11.8506	9.97379	6.51531	31.8414	24.0863	45.5847	99.944	61.396	31.7709
8.03023	20.6623	8.85754	12.9315	15.3164	28.1053	10.422	51.1945	53.613	31.6951	75.5111	81.4632	92.4574	99.5751	41.9793	65.1808	64.7221		22.9749	24.0251	18.7278	34.11	6.12813	28.7876	16.705	16.3742	44.9933	18.1643	68.3825	77.3899	54.5385	29.5762	52.0909	49.9776	90.4663	0	25.0516	18.6819		65.0785	15.5546	25.3217	34.7471	9.2388	12.9551	58.5406	57.5879	79.2394	29.3233	37.806
0.554861	21.2616	17.948	11.6267	10.4114	29.8732	7.36878	91.6243	91.8692	14.5351	67.675	85.247	108.153	77.8146	107.287	66.959			20.1181	25.6338	16.0537	123.563	4.02098	6.54038	30.7207	20.8755	12.1763	14.3989	52.8261	58.3617	121.502	13.5551	87.0135	79.4257		41.561	13.5604	19.9557		85.8043	15.9861	2.28132	15.665	8.42371	24.4273	12.9062	85.0929	70.9248	15.5316	22.5035
17.9911	4.54392	22.8754	9.84487	9.28667	26.199	18.658	80.2563	44.7923	96.2148	27.4543	0	32.5171	69.4447	28.4674	67.4351			13.6751	17.0882	40.9321	25.8202	27.686	15.7788	16.9241	18.2679	18.3471	5.61799	67.5494	40.9323	42.4126	64.1129	47.9921	50.6016		34.8723	49.3106	21.271		83.7032	44.0415	7.82156	5.07069	18.4838	27.8002	46.2779	77.4368	75.2159	18.9556	25.7927
18.3101	25.2478	7.16245	6.38136	11.4411	35.5615	22.9414	91.1051	51.2742	71.6273	21.6062	83.2088	96.1948	22.1367	68.1827	108.531			22.369	24.0794	22.0088	17.0091	10.7756	31.6264	33.6081	11.1329	10.3477	21.418	31.0784	2.0651	11.3726	61.1075	68.3954	61.9995		16.878	74.9341	12.6302		25.3345	6.07734	29.6928	58.8265	7.32606	24.7129	48.8546	16.5656	76.5762	46.8882	35.9284
50.018	24.4169	14.7813	8.76609	18.5086	37.3763	21.9675	26.8671	44.9335	7.832	41.8788	10.4339	97.7356	42.4446	88.9864	93.1579			16.4646	27.2127	20.7913	37.3159	16.0157	15.7751	11.6073	36.3653	33.0922	13.1442	18.3131	61.3897	18.1488	49.9243	85.0198	50.8264		41.1477	51.5178	95.2927		123.427	11.8734	28.8033	46.4643	20.372	31.4997	40.2502	71.9103	50.9056	33.6519	48.9474
28.842	5.92142	17.969	9.4898	13.2715	27.936	18.2171	115.906	96.0052	86.4908	15.5572	64.3176	89.1801	75.5735	75.1526	36.4327			17.1059	51.9325	42.9027	30.5104	8.60371	11.4217	17.6822	21.2285	11.9871	21.0417	80.4633	125.139	61.8408	37.7887	68.4003	30.418		47.2887	59.9149	49.3977		11.1316	28.1357	7.10732	68.9859	6.81476	28.294	15.0937	38.4444	55.0017	60.75	50.6843
15.2419	15.6874	13.771	14.8358	14.4993	27.1875	17.4332	16.2005	68.5394	75.2957	21.8525	0.596215	93.385	25.7412	28.5569	65.9452			46.0981	31.0073	29.8918	78.1327	20.5469	20.2337	22.5044	55.1315	61.3146	9.39276	63.396	48.2766	75.8366	22.3116	38.0604	51.1265		44.2643	26.4878	25.1033		15.0177	7.24172	18.6321	75.9342	16.5019	40.9303	81.7053	49.3977	69.1122	100.101	24.5496
26.4936	7.32662	19.3937	15.2388	20.5718	48.0631	4.74871	33.3728	66.4824	104.703	50.195	95.2665	30.0237	34.0994	53.865	71.2152			17.311	34.956	10.1044	102.597	20.7617	43.2992	18.8091	22.6816	71.7944	28.2563	58.8878	4.35645	64.4029	22.1485	79.2064	56.145		43.7071	69.5031	36.7185		66.1667	8.01808	15.3739	16.8141		26.8933	0	6.09281	56.4554	95.5719	15.7486
5.51043	30.6081	24.8606	12.4021	5.20312	34.3829	35.0576	66.5649	123.799	7.57987	84.1996	103.465	11.3779	78.7105	29.0089				43.8526	31.3084	19.534	101.504	18.94	22.5648	28.648	15.0678	17.1436	17.9805	0	62.2782	57.178	46.3575	70.9414	24.7425		37.1592	36.2953	47.376		120.118	22.8782	12.4496	16.7182		17.6944	51.8801	44.6351	87.5351	49.2138	13.8294
12.1456	14.0495	9.82103	25.6092	11.7346	25.7933	16.8464	65.2632	77.3118	36.3974	65.1751	103.91		35.939	33.8089				28.4973	34.1042	43.8286	65.8948	8.95655	11.4392	14.3471	26.0702	61.1329	15.5603	1.01727	68.2505	58.2929	67.1984	106.47	55.8506		30.7143	65.6936	29.7517		47.9619	2.59625	20.222	6.22117		12.5827	93.395	84.2769	83.3813	60.4567	3.01306
19.1835	7.2042	15.9276	5.32482	15.3974	30.7497	29.5236	68.4595	109.617	11.5245	124.811	82.5304		101.284	61.7746				7.73594	19.8085	14.1586	143.7	32.8971	11.1781	38.1472	11.9384	38.1248	15.3695	27.8424	78.889	43.0501	11.8767	95.8664	84.7774		40.1052	76.7961	67.4932		16.7997	11.7097	24.7977	27.4518		9.25009	35.3433	43.6374	100.595	77.6603	24.2541
32.9515	34.8867	14.8808	7.72604	10.9067	30.1959	13.9756	122.478	92.2929	97.6621	116.95	52.3219		101.884	43.1202				15.5225	38.8086	18.7681	14.045	24.1288	12.8525	28.0476	10.1726	53.6981	1.20223	72.4882	57.0789	51.8562	67.8221	53.7861	46.6157		16.398	31.6059	8.46924		101.713	7.95091	25.745			32.9191	8.3109	62.1377	116.798	55.6505	6.52751
12.44	3.59922	16.0374	31.103	12.3455	32.9139	23.6833	68.5903	116.369	42.8689	68.7666	96.8072		30.3298	46.8514				19.6103	15.9241	46.2588	57.8943	21.7668	36.5085	21.8378	27.5725	42.3804	35.0648	16.1733	98.3972	84.6095	32.8129	100.349	29.8561		46.1886	57.1342	5.33958		10.4761	20.4757	15.8278			52.2476	20.6867	10.3562	58.1499	24.9958	20.5258
7.97541	12.3177	9.3756	8.55774	14.0004	32.3458	21.3138	86.3049	64.207	56.6031	42.8654	9.87252		67.7935	63.0932				11.4358	49.9129	29.6706	53.7044	13.7915	5.88298	22.7566	56.3056	17.7927	11.636	85.7009	127.703	65.2681	4.15152	53.0334	69.8082		31.8872	47.6295	18.785		28.8355	4.92079	71.1179			31.9911	58.4381	30.3718	61.9883	73.2044	6.79844
43.2561	33.2946	30.2403	7.65835	12.0408	39.4259	40.2601	120.649	90.2685	38.788	48.4262	39.1992		103.347	17.091				24.3519	32.5162	28.2058	67.7158	11.4535	33.3052	19.4586	52.1337	36.4269	22.3843	26.7073	11.8856	51.1104	26.9314	74.221	60.9932		29.1236	10.6578	83.7693		19.2019	20.3481	9.57878			29.949	55.2173	60.4692	74.4269	30.4622	17.9519
39.2961	35.8784	30.6298	5.00233	17.7591	28.4717	14.764	86.8152	89.4212	17.3974	134.285	96.6526		63.6963	27.6237				13.0255	31.8534	28.907	52.8226	6.93331	33.8451	24.5664	18.313	28.7047	7.37176	68.3034	138.062	101.316	30.1331	109.096	74.543		9.81562	70.7431	68.2553		85.1695	26.2736	4.93912			26.3701	101.343	66.6127	99.4692	77.1495	10.3119
48.3829	13.1305	21.9409	6.4062	16.8407	10.5462	33.8488	59.1111	46.0986			94.5041			104.573				12.8652	43.8907	37.0028	101.556	18.7459	36.0864	39.7123	7.65214	25.8698	8.59408	25.085	66.3987	79.9333	20.4623	34.9336	105.804		34.8151	62.0633	105.036		127.243	8.82805	10.136			49.0258	23.6075	14.7528	33.3581	49.6761	47.8919
54.5391	0	16.5384	7.95964	21.7146	43.7866	26.59					79.6873			86.0513				26.912	28.0602	21.4106	45.033	16.1957	0	31.4438	11.2476	55.6699	10.6206	35.0054	23.9458	48.2624	34.6291	117.892	40.1148		73.3381	34.6263	86.5257		107.676	6.07106	7.06842			71.3101	66.1506	61.6621	47.9021	30.5599	9.93531
20.376	7.48583	12.8463	18.7082	14.5615	33.686	5.62903					10.4761			81.9765				35.5956	20.0476	32.456	52.0725	16.1372	36.0293	34.4641	39.5436	41.4288	33.087	38.6231	83.7008	47.2897	79.6495	30.4302	29.9213		27.5099	36.9522	72.8544		70.3916		15.1881			64.1546	63.0083	61.8147	48.9257	93.9933	32.6847
3.09095	22.0054	7.03807	5.80716	14.0163	39.9245	33.1827					70.2539			8.40153				45.4241	49.1187	35.9819	13.247	30.2294	19.3443	18.6747	35.373	47.303	24.2901		77.9872	38.5504	92.8265	79.2717	48.9543		39.0821	33.7045	39.6901		20.3494		2.13537			26.1757	52.2851	30.2219	115.866	33.0506	54.4005
7.87527	18.5389	21.7301	17.3291	12.4888	42.3171	8.6413					25.7246			76.4314				2.46529	18.6587	68.9911	76.0365	11.3552	54.0278	33.4056	23.7271	34.576	7.59761			106.07	47.3842	85.5575	116.838		68.3484	36.9415	42.4944		96.8265		87.4773			48.3063	59.4455	114.276	27.4611	56.8847	19.532
24.3034	0.949334	45.3308	12.4956	19.5564	32.3118	5.85272					7.74743			55.524				25.3773	23.9847	33.071	120.128	15.4959	10.5641	35.8218	14.7589	46.1788	10.3756			110.299	94.055	49.0507	23.4379		52.6395		39.0316		58.0928		62.635			15.9903	79.8158	52.8991	109.84	25.2721	9.79171
5.72871	22.8665	2.37764	4.17291	24.811	39.5614	31.5711					77.0653			1.10787				9.89608	22.2517	34.7858	59.441	17.8269	30.3628	30.6165	48.6878	57.4875	26.0948			70.1312	28.4695	94.3332			53.5883		56.9155		45.4231		13.2482			32.8205	39.6782	81.6456	71.7541		46.2322
1.66635	11.3124	31.7241	13.1757	22.0538	29.0041	10.1634					56.4676							40.3423	25.9644	70.4948	110.572	25.7609	17.4185	27.3417	36.4023	46.3481	23.1152			56.9251	61.9458	65.1863			54.8179		29.5355		16.5311		25.592			51.1172	11.6812	50.4678	31.4052		29.2786
28.2107	43.6377	23.8362	20.1579	8.1451	36.9951	23.1567					82.2236							10.9177	39.1286	43.1153	71.1073	40.2047	47.5144	24.3228	30.5384	18.233	18.0601			126.67	47.1614	68.6678					14.7137		98.3623		98.2929			38.2502	1.88984	36.199	113.88		0
8.79911	9.37316	10.7093	26.1649	7.64856	42.7719	46.5491					28.3785							8.38215	57.3711	25.8774	128.635	29.2407	30.4778	23.4404	45.94	47.4338	36.7945			74.732	44.7853	79.548					63.7664		54.7383		22.4703			14.3131	54.1925	91.2407	55.9227		10.8037
17.5197	45.0029	33.9379	11.4065	26.5523	30.3869	36.1454					18.0884							34.5773	24.2471	57.1627	79.335	20.8666	45.808	22.0693	26.1184	25.4981	7.56967			63.2505	46.8753	33.1634					32.8305		26.8344		0			12.3424	72.5278	10.9932	107.998		15.1173
39.4051	10.4275	16.0622	6.37545	25.2378	39.3492	25.5482												6.68517	60.3118	10.9453	88.7224	31.3979	32.7475	26.1359	65.2244	36.023	29.6847			83.5478	43.6864	97.2452					24.1126		98.5122		35.6341			3.68154	112.693	63.443	110.508		17.6688
26.5424	8.73327	24.0719	22.2562	25.3361	47.7374	14.5352												7.61922	20.5545	37.7265	99.6983	10.4254	14.1843	37.7099	58.9229	21.3604	25.492			106.111	43.396						96.9784		26.6382		24.9567			62.6123	66.5262	71.1046	66.4105		27.603
26.0943	18.558	10.2462	26.6063	20.4146	18.5808	15.3088												54.5089	24.707	24.6826	59.6081	20.6739	29.2499	35.7624	16.0757	32.4371	13.4425			70.5352	15.8831						8.56114				35.2796			25.6555	82.9827	21.0271	61.0016		13.7662
31.3011	5.28819	6.57809	14.113	20.0654	9.7203	31.7193												20.9907	34.4776	12.1495	60.5378	23.5161	16.378	18.7448	36.0706	73.8232	4.87394			82.2576	64.8417						32.9583				7.9492			40.85	13.5671	38.1036	85.9864		24.6429
24.1891	11.8437	4.28514	2.73974	19.6856	35.3885	17.1624												25.2392	21.7844	25.0231	135.827	17.4977	42.4348	26.524	13.9717	49.5993	26.096			85.0267	69.5648						33.9524				7.06236			18.9768	52.687	13.9641	53.3139		19.5176
77.3948	14.9612	8.60422	18.393	29.293	39.7666	15.6926												39.5572	68.9525	1.24401	56.0368	9.94554	8.43679	21.9143	40.9734	17.428	6.59571			49.8256	89.621						31.6535				97.0707			30.3775	30.3567	91.8571	27.5548		43.9146
19.5219	7.19977	15.0414	4.90625	42.5715	28.4919	8.64777												18.1014	13.8047	42.3833	87.4989	26.0161	12.3636	32.6095	63.2168	38.8632	7.52745			94.2525	88.7097						54.71				31.9098			20.2471	47.8221	51.1745	79.3617		23.0279
35.6786	49.0252	10.7609	31.27	22.6621	38.4499	19.791												52.6943	11.0899	13.1519	20.2383	33.4244	13.5128	15.5234	9.70114	65.509	4.04039			81.5949	94.9535						77.5244				25.4405			27.7806	50.8533	43.4908	67.4085		10.0714
31.4335	9.7678	12.4288	11.5874	14.1656	31.5666	6.6256												42.513	30.6663	45.4382	88.7252	31.6854	56.5639	28.7176	67.4063	12.8465	9.69377			40.0067	73.4776						8.67604				45.9082			43.2353	65.6271	34.005	74.6648		31.5433
7.66214	39.8859	19.5913	26.4905	18.3055	33.8592	34.2233												29.5685	41.8049	28.7835	10.2497	17.1222	28.8147	27.842	48.0107	64.0939	37.0267			47.3999	64.1263						28.3022							8.12415	3.19106	72.4283	116.885		29.9813
93.1626	12.1275	13.0157	21.997	29.4111	37.2449	17.4223												48.2963	60.3102	22.7737	90.1838	24.566	23.5887	33.8235	46.7414	27.0642	6.28908			48.3404	39.4639						37.2761							36.874	92.4684	29.0703	44.2977		26.1081
64.6796	23.1023	12.2661	18.3319	31.4225	30.2972	16.1258												33.9848	12.8764	17.9018	75.9417	25.8712	20.5362	33.0117	38.1548	14.2612	29.2219			127.237	12.4						58.2427							35.154	69.3899	62.4999	69.2077		26.9525
28.3724	65.0641	32.2648	28.9832	14.8725	34.0233	30.4216												32.1125	23.9988	13.4073	30.7057	29.9934	6.0677	27.6574	24.8046	32.8748	0.739706			92.2906	102.955						36.2488							48.0684	34.1711	47.8462	69.7868		26.6741
13.587	5.96127	25.0289	29.8355	36.1623	39.2888	30.848												24.139	18.5765	30.2451	14.9513	49.18	4.028	21.9892	50.2372	41.9978	35.082			109.284	34.6554						80.8001							34.5742	41.1716	70.0041	24.1157		20.0597
49.4719	41.4269	11.2443	17.1673	30.148	28.8872	1.16232												40.6824	47.5509	59.3712	81.711	23.4114	25.7525	27.183	66.8471	23.0223	36.7369			56.0907	106.894						41.0159							26.9706	83.4667	85.0572	22.6272		37.3467
14.4835	25.8712	29.407	5.78141	16.9775	50.432	13.8992												35.0217	67.5855	19.7641	48.6846	31.3664	36.2603	34.9786	63.6199	35.8551	14.5154			79.4565	46.9973						26.0259							32.6578	67.1266	78.1904	38.1292		12.9895
13.2513	13.735	22.1715	12.3258	26.3899	38.9712	21.7161												22.8441	33.8388	37.6179	128.468	54.2288	39.199	20.8305	63.3503	12.8336	39.1957			98.5349	102.145						22.4754							45.5741	51.1668	1.57983			38.1947
17.4638	9.05911	54.7599	3.56781	19.9326	20.5864	20.1294												12.1171	50.4587	62.1869	75.8214	37.7838	15.6206	33.8301	46.1251	20.4505	25.4013			59.0232	80.2356						76.8854							50.1934	80.788	48.9386			14.1991
2.84043	47.3634	15.6922	18.5437	24.5781	38.9361	3.46202												43.7197	61.8391	57.3239	140.506	38.8786	16.1058	33.6523	22.864	59.0487	4.86693			41.9113	20.8036						33.6875							46.2418	16.7798	49.4319			17.6462
46.3094	4.97494	18.8547	15.9296	22.0135	35.3288	21.1621												43.2541	39.245	36.3202	49.4061	46.596	58.7521	31.8958	43.7284	72.2875	43.4031			113.444	25.9945													49.4743	11.837	3.51139			63.4824
45.7358	20.8124	27.507	25.98	33.5216	43.5615	9.40391												53.4887	20.7909	22.0174	54.4618	14.6786	28.8884	36.1218	67.8121	36.2902	11.7871			14.7919	42.7261													47.9288	36.4359	10.2726			26.2125
5.27982	17.6645	23.7805	16.0566	28.7948		12.8953												26.4784	16.2068	7.01477		33.2691	7.34602	27.4822	42.5592	20.7173	5.10785				29.2237													29.6023	111.376	89.2495			39.6546
51.5272	32.2455	12.642	19.7997	33.7539		14.8008												57.4531	44.5234	45.1022		13.9356	27.9036	30.1286	13.3457	56.3073	9.95836				18.907													51.6355	49.4883	73.9261			33.0249
31.4599	12.2876	3.39418	18.1464	25.5842		41.7029												42.7283	22.3701	42.4305		32.5321	44.4545	46.0862	38.5019	26.6038	46.0168				86.0989													3.2286	57.3373	73.0664			31.2927
30.0567	21.1902	21.2184	42.2783			28.2595												24.6415	56.3086	57.1139		8.79238	26.0936	32.1707	30.6011	1.043	19.547				73.2919													58.3592	55.6842	79.4432			22.6177
8.53573	22.2097	30.171	20.0921			25.0493												3.90631	37.8061	30.195		16.6562	41.948	36.5768	34.047	45.725	0				83.5164													14.1295	95.0449	9.31974			49.1433
12.327	4.09079	30.8594	30.6603			37.8668												77.4169	34.5316	21.8428		28.5153	20.7038	32.7191		61.6543	4.22117				124.043													30.6197	50.0765	16.1093			26.6035
39.635	29.8929	39.7063	17.4517			36.6378												67.0475	56.3509	32.0321		10.0248	32.7879	36.9592		49.8006	19.6962				114.626													28.9053	22.8322	43.7529			25.7625
24.9519	52.3162	29.1177	27.8814			19.4643												36.736	23.4749	54.8474		17.1081	27.6945	26.0578		13.2421	20.7037				51.0443													43.7615	36.1512	51.8398			66.5047
40.5543	7.41552	32.1623	35.1698			11.2606												24.9512	21.9278	55.9724		38.0346	35.182	28.6405		56.8807	18.819				97.7099													10.5605	39.5813	40.9035			46.5541
23.0071	32.5665	20.4805	20.6428			6.57587												55.0188	40.2772	27.8366		26.9561	21.9191	34.1466		25.0121	31.9655				24.6928													66.8131		40.8025			26.4705
18.1968	47.4616	15.5744	19.5624			8.91147												42.3391	73.7786	40.4897		42.6496	20.973	45.167		35.6948	30.3379				43.1677															75.5745			25.6238
5.25345	25.1155	35.4066	18.3995			19.845												57.9468	56.0575	4.68584		42.6582	4.69418	31.4332		42.6574	44.2002				103.775															46.9311			50.1568
31.965	11.952	21.24	5.25514			21.7788												11.1108	60.9945	59.1062		15.6014	12.6316	35.56		26.2209	17.0949				76.9133															103.067			70.3325
35.4948	58.522	26.8902	8.74117			26.0452												36.327	26.4137	48.9763		34.0371	34.3034	31.0095		65.3317	38.0914				69.5328															98.3512			25.801
1.38895	59.3809	25.0007	35.3833			25.819												9.24834	48.9514	36.1304		22.1089	48.8247	60.5691		23.0217	0.783946																			50.2029			23.0438
30.1511	23.2978	11.4192	16.538			7.0719												25.8874	59.3438	26.9422		42.7447	21.6221	30.4234		41.2303	3.31364																			82.6948			44.7822
26.6934	38.8638	46.2158	33.9359			5.16969												10.2883	40.371	48.9568		39.7953	5.18117	20.4708		22.521	8.62741																			48.3214			43.2998
23.8663	44.4378	26.8253	25.0028			10.2522												61.1705	22.9279	32.2306		34.892	33.6283	45.4175		43.1372	40.1779																			29.4447			27.9235
	40.022	15.8244	23.391			16.0865												19.6641	46.0605	49.6783		29.9037	40.5175	18.0202		39.6295	8.47948																			40.8829			11.6309
	51.126	22.858	30.2548			23.947												20.0189	51.8289	74.5058		42.1801	12.5077	29.4589		67.6719	22.1346																			58.8536			64.8906
	57.1826	20.4553	16.2743			11.1798												42.9859	56.7615	31.0874		25.495	16.4717			71.5908	25.5147																			65.2903			32.4393
	19.9687	38.4726	18.5739			8.52545												12.1424	128.204	15.5416		38.5692	26.197				13.5187																			66.2076			36.3871
	26.4505	27.3662	23.9508			30.2489												14.9228	17.0448	15.6673		30.3224	29.6857																							83.924			53.6633
	54.9092	17.2916	15.0972			0												49.4904	52.1845	70.2078		27.3834	8.88466																										17.7056
	11.6882	31.1636	9.25662			30.8389												32.0895	30.0667	8.0197		4.15836	7.03216																										7.39931
	24.2961	15.3399	18.2634			11.7086												13.6555	35.9889	24.3543		36.2775	38.6844																										62.719
	38.3118	26.2271	33.3963			19.0533												42.751	66.7646	62.9373		24.1651	10.5247																										43.6842
	59.8232	26.3909	27.1772			21.3344												24.6841	48.3739	58.7811		62.7148	25.5696																										33.3737
	58.4303	15.984	23.4178			28.1578												56.8818	69.6853	55.3249		19.1076	12.5365
	17.3852	23.8889	35.1645			23.8804												12.5375	31.0606	64.907		40.5512
	27.1736		43.7335			24.3786												38.9438	18.6855	40.7642		37.4986
	12.199		29.8855			49.6304												64.913	45.9206	33.5347		18.6448
	65.6092		23.5893			30.9304												12.516	75.7183			34.061
	28.9598					44.7112												14.3474	63.1385			24.3299
	7.86602					0.611088												28.6251	33.528			32.7311
	44.1561					26.2306												47.0157	19.6859			18.9955
	4.06829					31.3949												14.0947	68.0882			48.8816
	58.9725					21.0054												25.2052	43.8068			23.1636
	16.5055					9.64031												22.4351	39.6994			35.5131
	40.3849					35.9087												11.513	22.966			53.2723
	32.2221					34.2601												32.6204	43.54			34.8444
	72.3528					10.028												28.0906	39.8191			27.1478
	36.5861					25.0157												50.3984	49.0733			50.4205
	7.67025					20.3288												8.47699	66.1539			41.4835
	57.4165					51.7098												19.0817	6.97463			20.4932
	33.4338																	0.398826	23.6785			31.0482
	47.6561																	57.531	57.8985			31.0114
	60.5179																	12.0879	35.2168			31.2248
	40.0683																	77.5388	66.5115			55.3647
	43.4986																	71.8045	24.7216			32.1547
	2.95504																	17.0404	67.1526			46.6606
	39.706																	22.3027	73.9053			39.1042
	69.6048																	26.1363	37.6128			45.1315
	56.6561																		69.3055			57.9755
	33.4625																		29.1554			33.7481
	29.3287																		45.9846			22.0313
	13.8427																		54.595			18.9865
																			29.883			49.9312
																			43.1829			34.2063
																			63.0349			50.504
																			20.6983			54.2856
																			17.9877			22.7702
																			52.3809			16.8573
																			58.2197			32.2135
																			23.2977
																			60.9477
																			34.2979
																			83.0382
																			43.19
																			58.9919
																			84.1656
																			33.5816
																			77.6617
																			36.4009
																			66.7078
																			90.109
																			32.4702
																			49.088
																			48.0975
																			56.8143
																			38.2637
																			36.5534
																			49.1957
																			25.4352
																			68.7217
																			15.5076
																			79.7878
																			27.1216
																			68.1861
																			37.781
																			109.404
																			79.3218
																			89.5227
																			82.2608
																			17.7199
																			55.6275
																			53.8672
																			87.1843
																			30.4641
																			100.883
																			33.8961
																			36.08
																			41.2888
																			99.4904
F. Extended or Not-extended
					in %
	Extended	Not-extended	Total		Extended	Not-extended	Total
wildtype	24	2	26		92.3077	7.69231	100
MZoep	0	40	40		0	100	100
DMSO	77	4	81		95.0617	4.93827	100
256c > Bud	1	48	49		2.04082	97.9592	100
256c > Shield	0	38	38		0	100	100
Shield > Bud	33	10	43		76.7442	23.2558	100
G. Circularity
			Nodal inhibitor (SB-505124)
wildtype	MZoep	DMSO (256c>Bud)	256c>Bud	256c>Shield	Shield>Bud
0.807	0.975	0.966	0.942	0.936	0.961
0.905	0.971	0.589	0.938	0.934	0.696
0.972	0.974	0.709	0.871	0.938	0.939
0.979	0.975	0.815	0.951	0.939	0.833
0.782	0.969	0.64	0.941	0.932	0.926
0.842	0.971	0.575	0.94	0.924	0.958
0.822	0.979	0.664	0.934	0.92	0.78
0.798	0.976	0.622	0.92	0.92	0.94
0.818	0.976	0.674	0.907	0.922	0.859
0.828	0.975	0.614	0.946	0.935	0.892
0.858	0.972	0.751	0.952	0.9	0.736
0.847	0.971	0.892	0.954	0.923	0.873
0.892	0.968	0.828	0.952	0.922	0.918
0.775	0.976	0.854	0.949	0.921	0.933
0.752	0.96	0.736	0.959	0.944	0.898
0.821	0.958	0.742	0.951	0.956	0.733
0.809	0.963	0.907	0.952	0.916	0.729
0.8	0.962	0.779	0.958	0.951	0.857
0.807	0.958	0.95	0.956	0.942	0.706
0.686	0.946	0.752	0.953	0.952	0.874
0.692	0.964	0.697	0.951	0.936	0.727
0.789	0.911	0.83	0.932	0.939	0.944
0.708	0.962	0.724	0.945	0.94	0.652
0.669	0.968	0.801	0.951	0.928	0.977
0.701	0.96	0.878	0.951	0.963	0.819
0.863	0.962	0.799	0.947	0.96	0.82
	0.956	0.767	0.957	0.957	0.965
	0.963	0.836	0.962	0.957	0.957
	0.954	0.833	0.954	0.96	0.835
	0.96	0.793	0.946	0.951	0.793
	0.951	0.799	0.953	0.964	0.88
	0.955	0.817	0.959	0.964	0.845
	0.964	0.648	0.941	0.961	0.812
	0.962	0.796	0.943	0.97	0.967
	0.966	0.915	0.943	0.962	0.84
	0.958	0.688	0.962	0.955	0.862
	0.963	0.631	0.965	0.953	0.773
	0.951	0.653	0.964	0.952	0.921
	0.957	0.617	0.961		0.83
	0.955	0.668	0.968		0.771
		0.601	0.972		0.798
		0.594	0.964		0.874
		0.876	0.954		0.955
		0.614	0.97
		0.787	0.962
		0.735	0.958
		0.801	0.967
		0.889	0.963
		0.617	0.961
		0.632
		0.91
		0.529
		0.835
		0.779
		0.81
		0.877
		0.841
		0.721
		0.645
		0.834
		0.879
		0.817
		0.763
		0.89
		0.908
		0.928
		0.8
		0.859
		0.793
		0.835
		0.725
		0.825
		0.951
		0.641
		0.855
		0.815
		0.871
		0.705
		0.835
		0.887
		0.899
H. Normalized extension length (%)
	Nodal inhibitor (SB-505124)
DMSO (256c>Bud)	Shield>Bud
53.7165	54.0664
46.9963	35.5017
27.1461	42.5674
39.6732	18.2788
50.9265	29.7028
50.9725	25.3882
40.07	36.0355
42.9269	37.2224
44.9892	20.224
34.8794	38.9977
29.8143	40.5844
37.1969	34.2046
28.0195	36.254
48.3364	40.0486
37.4021	33.7902
23.8977	42.5001
32.5899	42.546
44.699	40.9005
27.35	54.9143
49.916	30.6289
47.554	10.9385
27.9202	40.8306
42.9272	35.1547
37.249	35.2797
31.6487	28.6046
29.228	33.7519
31.8171	37.38
20.7575	41.3811
40.1057	40.1371
43.0787	44.953
33.9774	45.4328
38.0337	25.0342
48.1259	34.9463
42.6694
47.7986
50.0896
47.3941
49.0211
41.0936
46.9658
49.6777
51.8573
31.7241
34.8417
54.1026
18.369
47.6604
33.5258
14.315
47.6927
56.0387
22.1806
47.3539
32.0754
32.5618
24.0115
45.2478
40.1162
30.0927
33.768
27.1302
38.9715
38.3435
35.6209
18.1278
35.512
21.9775
35.4608
39.8238
51.7261
25.5205
37.6434
29.7677
42.2164
45.4942
33.2587
37.2897
[truncated: 3 more columns]
