# Supplementary material for: Zebrafish embryonic explants undergo genetically encoded self-assembly
Source: eLife. 2020 Apr 6;9:e55190. doi: 10.7554/eLife.55190 (PMC7190352; doi:10.7554/eLife.55190)
Supplement: Figure 3—figure supplement 1—source data 1. [file elife-55190-fig3-figsupp1-data1.xlsx]

## Sheet: Sheet1
Figure 3 - Supplement 1
A. Explant area
-60min	0min	30min	60min	90min	120min	150min	180min	210min
157644	168294	152717	162830	178412	181760	185212	187455	191034
169329	154572	170743	168832	182713	184960	178885	191290	192655
152150	152970	144089	161101	164802	169546	173738	179366	184420
157725	116908	172231	121275	125914	128449	125476	133713	138598
127122	176267	204586	137046	189565	151996	191005	193599	163207
155767	180571	139266	192673	155514	185682	157512	162636	195213
171982	147866	154129	160362	163891	162631	180471	163650	175695
151845	140861	168450	148019	145505	152678	162959	148567	161355
148798	135817	151876	162703	173398	139678	147769	181136	159149
140012	165820	170006	175273	145063	178211	151838	163660	187798
131394	145599	147650	134439	164484	152612	177275	146031	162922
148842	131686	161445	169043	159313	157763	151424	168009	147313
147895	150160	174512	152051	195167	166156	161389	173366	182294
142051	138079	148639	152348	168647	160126	156054	173659	164928
142081	183533	181158	168489	176116	177467	164376	184625	172560
156881	156793	154523	163358	167183	161512	179139	165919	178821
161439	149898	173812	175396	145099	174679	160053	168936	173136
162079	147669	144127	160197	160251	176049	169676	181683	180879
160504	155555	154609	142868	170093	143913	173734	151792	183847
157468	132915	151374	176312	160936	178153	149015	186840	156953
136073	164140	149648	172214	167277	178345	175798	175976	190832
149453	140616	164416	179165		193600	175060	196836	179795
148324	174908	158467				194502		204520
162044
B. Width of explant round portion
90min	120min	150min	180min	210min
498.131	477.241	462.145	446.791	462.567
451.318	434.187	400.493	422.894	429.935
523.46	462.264	462.584	454.424	454.739
542.875	477.001	478.876	455.167	453.831
528.547	509.021	516.377	518.398	508.512
480.767	516.979	520.383	518.327	503.11
486.727	450.712	452.147	414.348	397.188
519.772	400.916	453.899	441.755	448.916
445.975	473.711	455.954	493.083	435.798
466.297	490.184	503.431	416.796	483.945
441.912	474.004	391.069	430.262	417.349
473.476	423.718	447.091	428.675	461.173
469.167	422.369	432.364	433.288	426.198
451.694	431.393	405.902	414.383	416.205
476.798	454.603	417.115	439.699	417.642
475.319	457.165	454.598	451.415	452.999
423.706	428.756	439.846	432.222	433.102
476.748	444.931	426.631	412.657	423.299
475.726	494.059	440.087	459.687	441.113
438.844	463.102	457.208	453.269	459.801
	430.067	463.156	440.736	449.848
	446.158	448.467	460.066	440.819
		436.631		464.553
C. Extension length
90min	120min	150min	180min	210min
153.814	196.763	201.123	216.74	259.047
191.853	255.391	235.522	257.128	325.359
87.277	210.781	199.889	237.749	294.894
115.32	79.431	104.761	98.748	132.367
120.563	136.965	161.01	154.87	293.689
79.455	149.12	158.581	187.713	204.709
77.101	108.216	148.34	205.148	298.747
136.15	150.199	123.89	119.624	183.108
114.304	94.996	72.696	200.55	122.408
140.181	161.869	162.543	190.264	237.108
141.847	113.388	205.581	190.698	213.198
112.758	216.063	145.696	272.352	195.377
176.996	226.146	257.947	262.864	312.893
117.681	232.307	264.469	293.282	245.405
129.398	210.475	254.518	286.317	267.66
191.902	179.685	225.495	251.413	272.66
105.788	117.669	241.298	227.502	268.173
165.141	189.966	143.357	131.403	135.814
139.785	134.377	179.108	131.027	236.503
211.208	113.209	148.148	183.288	231.839
	128.052	139.184	186.761	148.242
	110.582	170.874	158.46	182.136
		130.022		196.145
E. Extended or Not-extended
					in %
	Extended	Not-extended	Total		Extended	Not-extended	Total
DMSO	28	1	29		96.5517	3.44828	100
HUA (shield>bud)	33	2	35		94.2857	5.71429	100
G. Normalized extension length (%)
DMSO	HUA (shield>bud)
31.7688	48.3039
44.3758	41.9372
46.1884	55.0376
35.6982	43.4476
41.726	56.6919
34.0326	42.1981
39.2748	22.8978
45.6312	42.2848
36.9962	26.7013
33.677	27.9978
29.6391	39.4231
39.5628	39.1148
38.4376	50.9317
40.7672	52.7342
41.4533	41.2941
35.6308	56.236
30.2861	51.0242
23.9596	41.841
23.7509	39.8011
45.2304	39.5499
47.6066	36.3832
40.325	43.9929
44.041	58.175
38.7452	47.5696
47.3934	52.7214
49.6356	47.3209
46.7463	47.914
54.8131	39.0233
	49.4359
	37.0213
	46.8302
	25.5213
