# Supplementary material for: Zebrafish embryonic explants undergo genetically encoded self-assembly
Source: eLife. 2020 Apr 6;9:e55190. doi: 10.7554/eLife.55190 (PMC7190352; doi:10.7554/eLife.55190)
Supplement: Figure 3—source data 1. [file elife-55190-fig3-data1.xlsx]

## Sheet: Sheet1
Figure 3
B. Extended or Not-extended
					in %
	Extended	Not-extended	Total		Extended	Not-extended	Total
wildtype	108	12	120		90	10	100
MZfz7a/b	0	31	31		0	100	0
MZwnt11	46	23	69		66.6667	33.3333	100
MZwnt5b	66	9	75		88	12	100
C. Circularity
wildtype	MZfz7a/b	MZwnt11	MZwnt5b
0.827	0.968	0.951	0.85
0.899	0.958	0.901	0.891
0.911	0.957	0.953	0.897
0.867	0.969	0.939	0.851
0.849	0.959	0.962	0.781
0.894	0.957	0.888	0.939
0.901	0.964	0.906	0.94
0.876	0.96	0.954	0.834
0.897	0.864	0.925	0.889
0.831	0.84	0.966	0.911
0.773	0.823	0.951	0.862
0.73	0.774	0.921	0.936
0.785	0.759	0.938	0.84
0.898	0.806	0.912	0.853
0.886	0.682	0.94	0.921
0.899	0.919	0.898	0.771
0.86	0.698	0.936	0.813
0.881	0.716	0.939	0.792
0.912	0.774	0.92	0.88
0.935	0.967	0.856	0.949
0.944	0.962	0.929	0.936
0.945	0.97	0.918	0.946
0.795	0.962	0.962	0.851
0.674	0.969	0.953	0.862
0.57	0.96	0.859	0.877
0.674	0.962	0.915	0.943
0.968	0.942	0.96	0.729
0.619	0.97	0.92	0.78
0.836	0.965	0.911	0.793
0.717	0.954	0.966	0.667
0.921	0.967	0.939	0.859
0.686		0.91	0.931
0.748		0.918	0.883
0.575		0.821	0.804
0.71		0.843	0.789
0.887		0.869	0.872
0.724		0.882	0.812
0.779		0.84	0.808
0.662		0.812	0.899
0.726		0.881	0.941
0.595		0.869	0.936
0.626		0.857	0.824
0.707		0.799	0.81
0.721		0.853	0.657
0.724		0.684	0.646
0.67		0.882	0.828
0.936		0.826	0.679
0.713		0.723	0.722
0.81		0.815	0.886
0.712		0.852	0.826
0.854		0.854	0.707
0.694		0.879	0.864
0.715		0.86	0.666
0.762		0.841	0.675
0.68		0.862	0.677
0.752		0.892	0.951
0.718		0.943	0.955
0.7		0.888	0.908
0.77		0.919	0.939
0.818		0.941	0.912
0.867		0.922	0.92
0.849		0.78	0.89
0.777		0.946	0.916
0.956		0.821	0.847
0.921		0.912	0.881
0.767		0.812	0.855
0.788		0.944	0.893
0.832		0.833	0.721
0.78		0.85	0.778
0.868			0.899
0.858			0.866
0.754			0.793
0.737			0.664
0.944			0.894
0.797			0.756
0.695
0.92
0.897
0.916
0.848
0.761
0.889
0.865
0.927
0.785
0.968
0.853
0.859
0.857
0.678
0.712
0.766
0.823
0.728
0.734
0.799
0.861
0.947
0.8
0.684
0.669
0.814
0.811
0.864
0.84
0.823
0.774
0.759
0.806
0.682
0.919
0.698
0.716
0.774
0.853
0.824
0.736
0.94
0.798
0.959
D. Normalized extension length (%)
wildtype	MZwnt11	MZwnt5b
38.028	37.0879	25.993
26.7132	18.9068	24.1099
34.1846	33.7226	20.4583
37.0654	31.0182	32.4415
17.2858	30.4568	35.0795
24.3013	25.2958	34.8434
36.1641	34.9652	22.7719
38.1882	36.6018	36.8085
39.2389	32.772	31.2069
38.0781	31.5698	47.0375
46.0978	35.4046	45.5632
19.8769	41.9235	43.6777
44.0565	29.5804	37.7655
45.4307	26.062	35.8154
37.9251	38.4764	11.5286
30.9626	32.7978	37.3275
52.0916	30.6419	25.5655
42.6395	29.6466	54.6306
27.8679	22.6396	48.2097
47.1862	30.3581	35.7727
38.4608	42.5164	49.9702
44.0654	19.2602	42.551
43.6252	33.845	49.4121
37.6089	26.9076	35.3474
34.8397	33.47	21.2129
53.1929	25.2124	48.2249
46.2719	26.6753	43.2897
41.5512	31.817	30.5649
34.0247	26.5332	40.9287
32.9612	30.5798	43.7185
43.0476	23.0441	33.0064
16.9248	29.6783	23.3776
28.2326	26.3808	34.5955
33.5034	23.4739	39.8227
26.1461	36.7544	38.2577
41.5018	23.7171	36.4181
31.9751	26.6777	47.1136
23.6567	26.8798	52.542
41.917	22.4258	24.987
25.35	23.9041	38.6502
31.502	20.8689	42.7278
34.2678	21.251	30.3594
35.4847	20.8217	34.0749
40.9864	18.5331	48.8494
28.7984	29.8327	46.2008
30.0258	19.6868	39.7406
26.5328		34.5019
29.7468		28.4126
36.8712		22.2082
38.6066		20.8633
33.0363		35.6328
27.0556		21.8257
48.2705		22.2668
41.6116		20.5871
31.8647		36.8986
40.1118		33.7563
40.6123		27.6116
45.4758		30.551
51.3416		19.3223
32.9446		33.9985
41.5759		24.5882
41.5516		31.9615
46.1761		33.5583
36.8049		26.8239
40.6677		25.7908
44.2118		24.0901
38.8181
34.1609
57.6366
25.5549
40.569
43.4752
37.4231
41.2912
42.3236
39.2575
43.2665
24.6522
43.3216
45.0663
51.8989
47.6664
45.6178
45.5552
52.9085
41.9373
47.5433
46.1057
29.2423
34.5106
36.4723
47.7091
36.9897
34.5575
23.3099
32.3871
25.2486
35.6703
47.0307
28.5434
19.8116
25.0156
38.0147
34.5714
33.4881
33.3899
32.0374
32.4648
