# Supplementary material for: Zebrafish embryonic explants undergo genetically encoded self-assembly
Source: eLife. 2020 Apr 6;9:e55190. doi: 10.7554/eLife.55190 (PMC7190352; doi:10.7554/eLife.55190)
Supplement: Figure 4—figure supplement 1—source data 1. [file elife-55190-fig4-figsupp1-data1.xlsx]

## Sheet: Sheet1
Figure 4 - Supplement 1
B. Phenotype DD-removed embryos 24hpf
								in %
	ventralized	Dorsal axis	Dorsal axis and head structures	Aberrant	Total			ventralized	Dorsal axis	Dorsal axis and head structures	Aberrant	Total
DD removed embryo 24hpf	28	10	8	3	49		DD removed embryo 24hpf	57.1429	20.4082	16.3265	6.12245	100
D. Percentage of DD-removed, animal pole and control explants with nuclear β-catenin
					in %
	Present	Absent	Total		Present	Absent	Total
control	26	4	30		86.6667	13.3333	100
Ddremoved explant	2	16	18		11.1111	88.8889	100
AP explant	1	9	10		10	90	100
F. Percentage of explants with sebox::EGFP present, reduced or absent
						in %
	Present	Reduced	Absent	Total		Present	Reduced	Absent	Total
control	74	10	0	84		88.0952	11.9048	0	100
Ddremoved explant	4	29	11	44		9.09091	65.9091	25	100
AP explant	1	9	17	27		3.7037	33.3333	62.963	100
G.Area of the sebox::EGFP-expressing domain
control	Ddremoved explant	AP explant
26720.4	15124.4	0
30065.1	6706.57	0
39155.7	14841	0
40860.7	10358	3642.14
53851.9	13799.3	7882.21
44411	0	0
24875.2	0	11121
31449.4	0	0
9591.94	18788.4	0
18385.1	11139.7	4539.04
22662.5	6402.93	3822.76
44520	8930.16	0
54305	6884.09	10004.6
37897.5	0	10048.2
21938.5	21760.9	0
43761.7	11008.9	0
28951.8	4472.09	0
32022.5	1979.12	0
33291.5	3922.42	0
40647.4	7077.17	0
22379.1	13115.7	3117.38
22332.4	11672.3	0
32377.5	19749.1	0
30364.1	11733	0
24054.6	7404.17	15825.1
65765.6	0	16072.7
54747.3	0	0
47466.1	0
37355.6	11262.8
8702.82	15744.2
41570.8	0
56472.6	2821.53
32547.2	5526.27
32997.2	24823.8
5348.75	5871.95
2826.2	0
30058.9	0
30940.2	0
14475.1	7066.27
23316.5	2475.84
16553.9	5289.58
55544.5	2958.55
17981.8	4138.86
48615.3	11658.3
36441.6
6821.8
24356.7
17534.9
20040.3
25376.6
13551.7
25428
35739.3
57350.8
21950.9
52179.5
58207.2
15994.9
59793.9
75113
43361.5
35589.8
19282
30020
20470.1
51164.3
23911.3
47118.9
47209.2
37799.4
32579.9
43378.6
70802.9
39914
31458.8
30717.6
13839.8
11568
21268.9
48422.2
16929.2
30289.4
17808.9
16367
H.Area of the sebox::EGFP-expressing domain versus the normalized extension length
control		DD removed		256c>Shield
Area of sebox::EGFP-expressing domain	Normalized length (%)	Area of sebox::EGFP-expressing domain	Normalized length (%)	Area of sebox::EGFP-expressing domain	Normalized length (%)
26720.4	43.0401	18788.4	32.739	16072.7	0
30065.1	37.6329	21760.9	40.0257	3642.14	0
39155.7	36.3705	19749.1	47.6059	7882.21	35.9199
40860.7	43.3454	24823.8	38.37	11121	42.0865
53851.9	34.488	15124.4	0	4539.04	0
44411	34.5081	6706.57	0	3822.76	0
24875.2	35.4581	14841	24.3134	10004.6	33.5558
31449.4	36.1592	10358.1	0	10048.2	0
18385.1	27.0578	13799.3	26.64	3117.38	0
22662.5	36.1324	11139.7	37.6167	15825.1	0
44520	47.7707	6402.93	33.4232	0	0
54305	38.9074	8930.16	25.7418	0	0
37897.5	41.8395	6884.09	28.5849	0	0
21938.5	33.43	11008.9	20.6513	0	0
43761.7	51.0049	4472.09	16.0215	0	0
28951.8	34.2357	1979.12	20.741	0	0
32022.5	30.793	3922.42	18.6551	0	0
33291.5	43.3479	7077.17	30.6198	0	0
40647.4	51.243	13115.7	34.4264	0	0
22379.1	40.3715	11672.3	43.3173	0	0
22332.4	37.4829	11733	40.683	0	0
32377.5	47.1856	7404.17	32.3056	0	0
30364.1	43.3997	11262.7	17.4028	0	0
24054.6	37.0136	15744.2	36.3926	0	0
8702.82	32.5264	2821.53	20.3059	0	0
56472.6	37.2519	5526.27	0	0	0
32997.2	34.5444	5871.95	30.8872	0	0
30058.9	26.2992	7066.27	0
30940.2	34.4615	2475.84	8.45305
23316.5	37.7834	5289.58	15.905
16553.9	38.4768	2958.55	14.3668
55544.5	36.7118	4138.86	21.5211
17981.8	27.1574	11658.3	30.5577
36441.6	39.85	0	0
6821.8	33.6789	0	0
24356.7	38.2786	0	0
17534.9	44.6743	0	0
20040.3	35.6001	0	0
25376.6	49.1063	0	0
25428	44.1887	0	0
35739.3	52.9027	0	0
57350.8	32.4063	0	0
21950.9	31.8313	0	0
52179.5	37.0761	0	0
58207.2	42.6083
59793.9	47.0456
75113	43.9161
43361.5	45.4062
35589.8	43.7656
30020	40.3461
20470.1	41.7852
51164.3	34.1192
23911.3	31.1227
47118.9	36.2057
47209.2	34.8252
37799.4	36.9582
32579.9	45.1101
43378.6	48.5116
70802.9	47.709
39914	36.0356
31458.8	35.8054
30717.6	36.8406
21268.9	31.5037
48422.2	44.1094
16929.2	34.2464
30289.4	38.8989
17808.9	31.907
16367	33.1648
9591.94	32.1475
5348.75	41.3254
2826.2	15.0054
14475.1	33.0335
13551.7	42.4402
15994.9	26.5918
19282	23.4653
13839.8	24.6198
11567.9	23.4679
