# Supplementary material for: Zebrafish embryonic explants undergo genetically encoded self-assembly
Source: eLife. 2020 Apr 6;9:e55190. doi: 10.7554/eLife.55190 (PMC7190352; doi:10.7554/eLife.55190)
Supplement: Figure 4—figure supplement 2—source data 1. [file elife-55190-fig4-figsupp2-data1.xlsx]

## Sheet: Sheet1
Figure 4 - Supplement 2
B. Percentage of embryos with present, strongly reduced or absent pSMAD2/3
	pSMAD2/3					in %
	Present	Strongly reduced	Absent	Total		Present	Strongly reduced	Absent	Total
Control	24	0	0	24		100	0	0	100
DD-removed	23	0	2	25		92	0	8	100
C. Percentage of pSmad2/3 positive nuclei
50% epiboly
control embryo	DD-removed embryo
30.5433	40.6504
33.581	24.6753
38.4892	42.3929
45.8333	26.5647
47.6191	51.2415
70.4497	52.4851
67.963	60.6452
55.8763	60.9866
48.3826	65.5527
61.9741
D. Normalized intensity of brighest pSMAD2/3 nuclei
50% epiboly
Control embryo										DD-removed embryo
0.375674	0.586422	0.729716	0.851753	0.584748	1.8312	1.7274	1.31981	1.64129	1.72064	0.379028	0.342594	0.641628	0.383074	0.776949	1.02478	1.63942	2.61964	3.30006
0.345149	0.513433	0.718205	0.747708	0.583568	1.7933	1.72396	1.1587	1.32516	1.67759	0.371487	0.282787	0.624039	0.358228	0.759531	0.938006	1.45144	2.35245	3.27232
0.302575	0.439652	0.69105	0.738799	0.54738	1.78617	1.69445	1.14801	1.30526	1.59088	0.368537	0.262314	0.578477	0.312366	0.677583	0.813036	1.44181	2.23905	3.1854
0.299116	0.406226	0.671096	0.715083	0.543629	1.68476	1.54122	1.12156	1.11156	1.50572	0.361091	0.260617	0.558967	0.307863	0.67645	0.809121	1.41059	2.23251	3.14645
0.2978	0.405673	0.665825	0.703937	0.513649	1.66938	1.51962	1.09122	1.07433	1.42558	0.360527	0.245449	0.555634	0.303286	0.614418	0.765967	1.3979	2.0374	2.96506
0.293461	0.396458	0.644048	0.666114	0.512062	1.66802	1.51507	1.0859	1.07429	1.4149	0.348078	0.242683	0.530165	0.299846	0.589337	0.736236	1.39536	1.98226	2.94274
0.292554	0.391542	0.637652	0.62903	0.510802	1.65878	1.43174	1.07981	1.0515	1.38989	0.336172	0.239213	0.522869	0.295513	0.552085	0.7255	1.38587	1.93008	2.8767
0.292447	0.391226	0.630392	0.628385	0.507017	1.64807	1.42432	1.05329	1.03331	1.38728	0.333807	0.226265	0.520696	0.280382	0.52576	0.6963	1.37992	1.92597	2.86404
0.288137	0.362376	0.628977	0.609865	0.499897	1.64029	1.42249	1.01189	1.03284	1.36954	0.330612	0.225897	0.513294	0.274701	0.509342	0.665603	1.36672	1.86118	2.85021
0.287299	0.359701	0.619358	0.58699	0.48673	1.62191	1.41014	1.01005	1.03153	1.35829	0.329318	0.221605	0.513021	0.272938	0.508299	0.655235	1.36105	1.77489	2.79859
0.273715	0.349765	0.57488	0.572677	0.482375	1.60881	1.39932	0.99922	1.01724	1.35059	0.328426	0.221561	0.509977	0.272725	0.506864	0.654032	1.32733	1.75979	2.75753
0.271006	0.348353	0.565324	0.571478	0.474123	1.60707	1.37026	0.997152	1.01502	1.34587	0.323001	0.220915	0.501324	0.270636	0.506741	0.651682	1.28443	1.71816	2.71711
0.26986	0.331633	0.559436	0.556919	0.457775	1.60511	1.35572	0.983818	1.01239	1.34065	0.320104	0.216297	0.491722	0.266433	0.49224	0.649959	1.26231	1.71758	2.70291
0.269187	0.329221	0.544204	0.553381	0.453585	1.59205	1.35046	0.976396	0.985682	1.33784	0.317671	0.215622	0.489189	0.265392	0.487674	0.639372	1.24182	1.7103	2.67268
0.265375	0.328927	0.523909	0.55333	0.444053	1.59085	1.34207	0.924699	0.940403	1.33583	0.312718	0.213804	0.48678	0.263179	0.484294	0.634922	1.24158	1.69869	2.66328
0.259508	0.323663	0.519625	0.544422	0.44156	1.58994	1.32973	0.898684	0.930527	1.3356	0.312089	0.213177	0.48404	0.261085	0.478948	0.633367	1.22029	1.69163	2.56037
0.257113	0.321386	0.515536	0.541359	0.438992	1.584	1.31169	0.886334	0.926277	1.33288	0.308051	0.208922	0.474739	0.260503	0.478108	0.62678	1.18938	1.68969	2.49835
0.255601	0.320979	0.50272	0.541036	0.435904	1.55095	1.29652	0.859139	0.924855	1.33027	0.307091	0.208288	0.472477	0.258344	0.474081	0.611174	1.18093	1.64733	2.41351
0.252063	0.318373	0.499333	0.537856	0.42193	1.5371	1.29534	0.859003	0.923223	1.31883	0.301875	0.205966	0.471994	0.258067	0.456337	0.609966	1.15514	1.63504	2.40513
0.251012	0.313885	0.498647	0.527981	0.418082	1.52064	1.29338	0.847111	0.909338	1.29323	0.299973	0.205411	0.469534	0.25708	0.44423	0.609705	1.1388	1.61088	2.40086
0.248721	0.3119	0.492676	0.526848	0.417672	1.51092	1.29063	0.846544	0.906801	1.29144	0.299332	0.204547	0.465958	0.256844	0.443111	0.601965	1.13734	1.54066	2.32239
0.248246	0.310933	0.492634	0.513854	0.41645	1.50999	1.268	0.844818	0.903053	1.28929	0.297059	0.204245	0.449512	0.256606	0.442557	0.601069	1.1277	1.50045	2.30158
0.247301	0.308853	0.489102	0.510507	0.414162	1.5028	1.26625	0.830269	0.899035	1.28824	0.293884	0.202577	0.448217	0.253883	0.438964	0.59093	1.1083	1.45316	2.3005
0.246059	0.301064	0.486677	0.502378	0.412654	1.4932	1.26147	0.822601	0.852531	1.27623	0.29103	0.198654	0.446764	0.250335	0.433133	0.589869	1.10522	1.4405	2.2762
0.245085	0.296741	0.484831	0.495118	0.410129	1.45443	1.25482	0.821684	0.848337	1.27262	0.288065	0.197981	0.443726	0.249069	0.424838	0.584533	1.09065	1.36672	2.24034
0.244045	0.296481	0.484815	0.494944	0.398594	1.44673	1.2475	0.815269	0.838925	1.26851	0.285025	0.194955	0.432401	0.245334	0.419383	0.581985	1.06356	1.36255	2.23718
0.241266	0.293066	0.482016	0.492723	0.395849	1.4395	1.2456	0.804993	0.834071	1.26843	0.284033	0.193334	0.431821	0.24389	0.409852	0.567734	1.04505	1.35682	2.21811
0.240917	0.292137	0.481134	0.490409	0.392047	1.42756	1.24018	0.799253	0.82235	1.26129	0.282015	0.190079	0.423176	0.24278	0.408024	0.566095	1.01849	1.33096	2.17424
0.240858	0.291853	0.478294	0.490369	0.391736	1.42298	1.235	0.794515	0.817878	1.24229	0.281374	0.187305	0.418025	0.238313	0.405093	0.561228	1.0082	1.32855	2.16623
0.23695	0.291819	0.474277	0.489627	0.383792	1.41648	1.20409	0.794277	0.813783	1.19784	0.278502	0.185755	0.416924	0.238159	0.393223	0.558353	0.99649	1.30855	2.14783
0.236251	0.291176	0.472316	0.488297	0.382481	1.38653	1.20398	0.793657	0.805949	1.19173	0.278492	0.185669	0.416778	0.237924	0.382707	0.554467	0.970979	1.30029	2.12942
0.234566	0.286918	0.469262	0.485557	0.380346	1.38628	1.18946	0.781279	0.804632	1.18488	0.274745	0.184662	0.415932	0.237031	0.382129	0.553712	0.97026	1.27938	2.11523
0.234512	0.2868	0.463671	0.485217	0.373659	1.38172	1.18103	0.78054	0.800054	1.1807	0.27339	0.184607	0.414651	0.236072	0.381362	0.553172	0.969779	1.25018	2.104
0.234414	0.283987	0.460804	0.482801	0.3732	1.37179	1.17564	0.739477	0.794645	1.15644	0.271697	0.184176	0.412452	0.235058	0.377109	0.549329	0.966265	1.24216	2.09253
0.233312	0.282637	0.459834	0.481377	0.368305	1.36392	1.15044	0.734084	0.789178	1.15216	0.271623	0.184065	0.404131	0.231008	0.376873	0.534496	0.965872	1.24139	2.09029
0.23148	0.282453	0.459151	0.479072	0.366856	1.34149	1.1478	0.725712	0.783659	1.13596	0.271435	0.183492	0.401882	0.230711	0.376374	0.53284	0.958404	1.23407	2.083
0.231368	0.280683	0.451403	0.476868	0.364388	1.32276	1.13834	0.723565	0.778766	1.12304	0.269397	0.180057	0.401425	0.229732	0.375773	0.530006	0.944413	1.1963	2.07517
0.229443	0.276803	0.449497	0.476054	0.357904	1.29006	1.13602	0.721679	0.766684	1.11746	0.267204	0.176875	0.397768	0.228739	0.375633	0.529286	0.937996	1.19199	2.05329
0.228108	0.275956	0.449432	0.472981	0.35691	1.27439	1.13348	0.715096	0.762238	1.11735	0.266156	0.176755	0.397753	0.22731	0.365016	0.528007	0.93255	1.18582	2.04074
0.227908	0.273471	0.444402	0.467955	0.356504	1.2707	1.13169	0.714273	0.754691	1.11477	0.265401	0.175971	0.393361	0.226609	0.363905	0.5258	0.909751	1.18544	2.02311
0.227234	0.272514	0.44209	0.466347	0.356143	1.2507	1.10921	0.70135	0.75081	1.10522	0.26444	0.175859	0.380734	0.223291	0.363058	0.523023	0.903523	1.18123	1.96543
0.22632	0.27174	0.438236	0.456953	0.35112	1.23463	1.09765	0.699116	0.732783	1.099	0.264099	0.174101	0.380732	0.221863	0.360902	0.520856	0.903431	1.16632	1.95835
0.22229	0.270505	0.434183	0.455728	0.348447	1.22927	1.08243	0.682245	0.72918	1.08312	0.26285	0.172885	0.380118	0.221741	0.358757	0.519409	0.903298	1.13039	1.92023
0.221127	0.266858	0.432306	0.455407	0.348107	1.22661	1.0806	0.670689	0.710145	1.07863	0.258725	0.172483	0.378184	0.219413	0.358648	0.514375	0.894418	1.0705	1.86249
0.220172	0.266407	0.425948	0.452316	0.347422	1.22462	1.07873	0.66836	0.704715	1.07088	0.258642	0.171313	0.375244	0.21691	0.358311	0.513278	0.875279	1.05484	1.83998
0.219355	0.265763	0.424055	0.45007	0.347004	1.21192	1.07729	0.663004	0.694056	1.05852	0.258204	0.170677	0.374617	0.216832	0.357028	0.499703	0.872488	1.04598	1.8155
0.218814	0.264279	0.419676	0.44935	0.346635	1.21044	1.076	0.662827	0.692483	1.04205	0.25694		0.371739	0.214938	0.350442	0.499185	0.848819	1.03726	1.81284
0.218814	0.257603	0.41868	0.446543	0.340729	1.2066	1.073	0.655905	0.691156	1.04183	0.255293		0.370773	0.213995	0.348244	0.496259	0.837105	1.03645	1.80584
0.218111	0.25664	0.416152	0.446266	0.339398	1.2017	1.07091	0.632712	0.67963	1.02923	0.254668		0.369581	0.213532	0.347721	0.490949	0.823827	1.03327	1.73443
0.217791	0.25563	0.41187	0.445538	0.337905	1.18857	1.06542	0.62163	0.679137	1.02618	0.251212		0.365167	0.211775	0.346895	0.489219	0.817547	1.01819	1.71394
0.214955	0.253263	0.410845	0.442103	0.334525	1.18551	1.06308	0.62115	0.662911	1.02117	0.248696		0.361669	0.210702	0.341764	0.48812	0.799458	0.988779	1.71255
0.21475	0.249194	0.410056	0.440112	0.334261	1.18236	1.04774	0.619206	0.639303	1.0177	0.247104		0.357378	0.209494	0.341688	0.486853	0.792624	0.984468	1.68273
0.214608	0.248912	0.406875	0.439547	0.328399	1.16836	1.04449	0.615504	0.636688	1.01515	0.246064		0.35493	0.208572	0.341327	0.486514	0.786026	0.983048	1.65134
0.214058	0.248697	0.402275	0.436836	0.325354	1.16809	1.03861	0.60546	0.620744	1.01451	0.243637		0.352814	0.203741	0.340375	0.485143	0.784662	0.967454	1.64824
0.213069	0.246062	0.401037	0.436073	0.325343	1.16576	1.02927	0.601804	0.619977	1.00995	0.242799		0.348628	0.203506	0.338062	0.482695	0.7812	0.963657	1.61731
0.211265	0.243669	0.397316	0.434103	0.323745	1.16422	1.02833	0.598243	0.619546	1.00932	0.241895		0.346523	0.202972	0.336394	0.481641	0.753555	0.956206	1.56922
0.209687	0.243529	0.396012	0.433831	0.319204	1.15529	1.01249	0.592505	0.598624	1.00676	0.241501		0.34274	0.202963	0.336072	0.476656	0.744849	0.942944	1.56557
0.209658	0.241549	0.394195	0.4273	0.319017	1.1492	1.01156	0.592063	0.593735	0.994945	0.240056		0.340708		0.332033	0.476171	0.721494	0.936389	1.5596
0.209292	0.240978	0.393982	0.42143	0.318195	1.14668	1.00633	0.581088	0.587901	0.984177	0.237456		0.340006		0.327129	0.473225	0.717884	0.933232	1.54434
0.209112	0.240556	0.393784	0.421259	0.317824	1.13305	1.00077	0.579444	0.573788	0.981291	0.236212		0.33395		0.325602	0.471096	0.715214	0.928837	1.50855
0.207383	0.239597	0.392633	0.419601	0.31704	1.11566	0.999077	0.578173	0.553642	0.967056	0.235878		0.332967		0.324213	0.471061	0.71178	0.915806	1.43924
0.207252	0.239365	0.384849	0.415029	0.315163	1.11392	0.994736	0.574585	0.549657	0.964649	0.235427		0.327001		0.322505	0.465986	0.7113	0.915799	1.43763
	0.236819	0.382221	0.414738	0.313184	1.1025	0.984271	0.574464	0.548197	0.958923	0.234748		0.324411		0.318111	0.46252	0.711027	0.914467	1.37177
	0.235943	0.376794	0.414735	0.312543	1.09273	0.971137	0.568798	0.540116	0.958784	0.234387		0.324372		0.315806	0.460973	0.706922	0.911622	1.36688
	0.230658		0.411552	0.311826	1.0887	0.969884	0.566394	0.530948	0.954027	0.234295		0.323253		0.311436	0.4566	0.700767	0.909776	1.34082
	0.230487		0.409525	0.309876	1.07833	0.968847	0.561498	0.529209	0.953113	0.233462		0.321146		0.311314	0.451673	0.699323	0.908056	1.33189
	0.228954		0.409432	0.309116	1.07684	0.962903	0.559472	0.524139	0.951585	0.231899		0.31988		0.307451	0.447726	0.689255	0.898006	1.33096
	0.228363		0.407833	0.307949	1.07252	0.950259	0.538723	0.519069	0.939916	0.229695		0.318806		0.306631	0.446434	0.673553	0.894415	1.3024
			0.40781	0.305055	1.06995	0.948591	0.535156	0.517179	0.939215	0.229262		0.317788			0.444295	0.670768	0.876411	1.3017
			0.405897	0.304265	1.01438	0.947009	0.519083	0.513718	0.930799	0.228205		0.316921			0.44037	0.663792	0.86763	1.26658
			0.405702	0.297894	1.00833	0.930899	0.516618	0.513637	0.922817	0.224488		0.31606			0.437713	0.647203	0.848535	1.24038
			0.403834	0.297757	1.00135	0.929981	0.514896	0.507018	0.918105	0.224202		0.311677			0.432704	0.6455	0.84588	1.19257
			0.402887		0.99404	0.928136	0.51448	0.490211	0.914962	0.223136		0.31029			0.432607	0.625419	0.839316	1.19032
			0.400063		0.983789	0.923332	0.513877	0.475982	0.910974	0.222954		0.306906			0.421715	0.625174	0.829487	1.15963
			0.396241		0.978288	0.918081	0.511998	0.475495	0.896471	0.22231		0.301115			0.421593	0.612971	0.816778	1.15647
			0.395872		0.975811	0.906158	0.50992	0.46287	0.891554			0.300815			0.421458	0.611046	0.813445	1.15402
			0.394562		0.957227	0.897095	0.509272	0.457316	0.889854			0.299244			0.420332	0.607945	0.809968	1.14081
			0.39451		0.954873	0.887997	0.508536	0.452152	0.888382			0.29571			0.417725	0.596394	0.798624
			0.393812		0.951702	0.887888	0.504432	0.445211	0.884984			0.294448			0.415314	0.589466	0.7838
			0.393052		0.941893	0.885652	0.491206	0.44027	0.882038			0.292292				0.581409	0.779143
			0.390281		0.936674	0.877402	0.483417	0.439223	0.876354			0.288195				0.58128	0.774405
			0.388113		0.934738	0.875666		0.43549	0.872427			0.286888				0.579084	0.773017
			0.383993		0.925086	0.873239		0.433475	0.854415			0.285435
					0.91637	0.866505		0.433465	0.849318			0.285263
					0.915821	0.858889		0.432916	0.843943			0.283858
					0.913544	0.857596		0.424838	0.836569			0.283348
					0.910591	0.852354		0.424467	0.832878
					0.910491	0.847317		0.424072	0.828532
					0.906366	0.837505		0.419486	0.82844
					0.90088	0.831655		0.417079	0.824949
					0.900415	0.823614		0.410597	0.822272
					0.890522	0.820864		0.40877	0.810839
					0.889644	0.820493		0.407769	0.801893
					0.887623	0.817842		0.407023	0.800742
					0.882353	0.817837		0.406234	0.797447
					0.875478	0.817687		0.405483	0.791361
					0.873971	0.815527		0.404837	0.78986
					0.871042	0.811768		0.402137	0.787341
					0.857635	0.807782		0.399664	0.784841
						0.801417		0.39886	0.777447
						0.796693		0.398272	0.772935
						0.792977		0.38501	0.772647
						0.79287		0.38061	0.772453
						0.790153			0.768817
						0.786208			0.767116
						0.77831			0.760979
						0.77829			0.758536
						0.77762			0.750804
						0.775948			0.74853
						0.772932			0.740731
									0.736801
									0.728347
									0.728222
									0.727519
									0.726692
F. Percentage of embryos with sebox::EGFP present, reduced or absent
						in %
	Present	Reduced	Absent	Total		Present	Reduced	Absent	Total
control embryos	20	0	0	20		100	0	0	100
Ddremoved embryos	29	0	0	29		100	0	0	100
H. Percentage Percentage of control and CA-Alk8-overexpressing explants with present, strongly reduced or absent pMAD2/3
	pSMAD2/3					in %
	Present	Strongly reduced	Absent	Total		Present	Strongly reduced	Absent	Total
Control	13	3	2	18		72.2222	16.6667	11.1111	100
DD-removed	7	2	1	10		70	20	10	100
