# Supplementary material for: Zebrafish embryonic explants undergo genetically encoded self-assembly
Source: eLife. 2020 Apr 6;9:e55190. doi: 10.7554/eLife.55190 (PMC7190352; doi:10.7554/eLife.55190)
Supplement: Figure 4—figure supplement 3—source data 1. [file elife-55190-fig4-figsupp3-data1.xlsx]

## Sheet: Sheet1
Figure 4 - Supplement 3
C. Cell size of blastomere re-aggregates
	Time
	0	32	64	96	128	160	196	224
Cell size	32.806	37.825	35.869	25.641	22.487	19.39	25.868	19.743
	38.25	27.993	42.938	28.41	26.792	22.014	19.103	18.016
	41.935	25.659	28.898	42.193	22.48	21.281	20.814	21.151
	31.043	25.261	28.019	32.563	22.116	24.931	16.202	19.699
	26.013	30.319	34.934	29.159	17.619	27.529	13.96	24.449
	29.936	33.145	29.838	27.074	22.233	29.559	14.974	21.176
	30.309	33.662	32.832	31.606	27.023	31.915	21.378	17.123
	30.93	31.562	28.73	27.016	17.629	16.549	17.042	19.265
	40.135	37.606	31.611	30.546	21.281	21.012	15.27	21.176
	28.293	25.802	26.081	24.987	21.378	20.765	19.238	24.144
	27.69	30.793	19.238	26.265	26.997	24.653	21.354	25.22
	40.345	35.361	30.319	29.324	19.558	22.845	20.548	37.574
	24.452	31.834	30.523	33.641	25.741	25.902	18.093	22.807
	26.838	32.435	35.414	22.935	25.138	22.163	21.176	20.831
	24.681	35.985	33.078	27.074	17.668	22.973	27.61	25.868
	43.126	27.099	37.205	20.914	21.928	24.144	32.763	14.506
	28.491	26.786	26.265	19.951	20.43	22.014	24.987	26.747
	35.025	29.512	24.534	33.988	19.699	23.256	20.455	22.139
	33.923	30.832	29.436	34.145	32.937	22.875	23.271	20.362
	27.917	34.786	31.392	20.489	27.902	18.913	16.455	18.093
	37.974	29.947	27.902	20.856	39.82	17.629	33.067	20.631
	41.258	22.51	29.059	24.101	35.999	25.007	21.29	15.45
	38.195	33.265	41.567	32.874	25.499	19.969	19.55	22.139
	32.569	31.282	33.317	34.145	26.324	22.48	19.452	22.441
	28.565	20.089	30.234	19.602	27.828	24.973	14.095	18.803
	29.652	26.324	18.977	21.659	21.435	15.814	21.184	20.003
	35.73	27.722	16.632	29.26	21.053	20.589	24.08	14.718
	28.874	26.455	17.862	21.659	21.151	17.521	19.969	21.667
	36.884	23.382	15.008	24.987	21.659	21.507	23.389	16.244
	39.786	23.704	28.41	20.831	23.47	21.595	16.455	16.287
	30.005	19.602	20.455	24.365	18.245	22.326	17.619	17.521
	27.976	19.39	24.108	18.348	18.442	22.202	19.873	17.442
	37.005	19.238	23.763	17.833	23.675	23.47	16.695	21.053
	36.626	32.254	18.665	18.94	19.176	19.265	13.96	14.01
	37.606	21.738	24.258	16.539	16.244	22.693	23.293	24.187
	27.207	21.29	31.518	21.176	24.144	22.426	15.638	18.94
	36.185	23.145	21.281	20.556	20.089	25.282	18.94	21.012
	34.696	21.281	27.252	23.675	22.594	16.941	20.514	15.868
	35.831	25.042	24.987	30.319	24.59	17.462	19.558	19.176
	25.868	27.976	25.902	30.461	24.428	18.913	26.298	31.628
	45.983	33.192	23.271	27.397	19.943	22.845	15.605	18.442
	19.55	18.766	25.748	30.387	25.363	18.693	22.046	20.286
	39.459	18.876	23.234	22.852	22.441	17.462	22.845	23.389
	42.91	25.138	26.324	19.265	18.216	21.563	17.273	22.594
	35.725	22.686	22.663	23.033	24.973	24.695	13.521	17.032
	42.107	26.265	20.831	25.042	22.973	26.533	21.273	19.121
	24.841	13.04	19.202	28.73	19.121	23.234	14.683	17.93
	30.319	19.629	39.099	26.324	22.441	23.492	23.646	17.193
	36.982	13.521	27.409	27.321	25.741	18.803	20.252	17.462
	29.739	32.082	16.539	21.991	30.234	20.252	18.572	15.416
	29.495	28.489	19.743	23.972	20.046	24.987	21.435	24.108
	25.302	24.144	24.215	28.343	16.941	27.378	21.281	24.315
	29.26	27.859	27.976	21.659	17.123	23.994	18.977	22.202
	34.894	31.785	19.699	22.233	15.043	23.025	30.95	18.093
	38.18	21.667	21.184	20.252	27.902	23.389	21.849	16.287
	29.159	21.667	24.478	24.144	29.93	16.695	25.607	18.913
	29.838	21.944	27.055	35.288	21.731	23.675	22.852	20.277
	22.163	21.849	21.217	21.667	22.364	20.856	20.046	16.041
	23.972	22.663	23.137	20.226	22.326	15.55	17.072	11.584
	24.315	23.448	25.363	19.523	24.428	19.202	24.987	14.823
	25.788	26.193	19.238	24.779	23.093	20.914	22.139	20.252
	41.513	21.928	27.976	19.969	30.748	34.457	23.784	19.176
	25.22	25.654	29.495	25.868	17.629	19.977	18.693	17.032
	27.629	37.976	21.731	17.668	27.759	23.271	17.891	43.018
	29.913	15.638	21.547	15.505	21.731	19.523	20.814	20.003
	25.962	19.461	19.943	22.973	20.811	18.665	17.462	17.462
	28.802	25.788	25.848	25.09	18.184	15.008	13.623	14.095
	22.875	28.289	20.046	21.346	29.002	20.756	17.619	13.711
	25.802	21.595	23.492	19.265	13.162	12.348	16.041	18.14
	26.068	15.814	24.101	23.784	20.362	23.522	25.09	14.974
	22.287	17.123	32.937	20.046	19.097	34.175	18.665	16.612
	27.422	22.014	21.281	15.977	17.106	21.184	19.558	19.238
	24.59	22.663	23.907	23.47	14.111	15.279	18.216	19.69
	29.681	21.086	24.365	21.217	15.731	21.07	21.176	20.831
	25.587	17.756	18.94	15.857	20.226	15.123	35.483	17.93
	26.695	30.523	24.59	23.115	11.92	17.72	17.042	18.433
	21.547	28.197	26.436	28.934	16.951	19.77	16.127	22.845
	28.874	25.418	26.008	23.779	24.159	23.623	21.189	19.121
	28.73	34.412	22.163	21.954	24.371	26.802	20.401	16.129
	26.226	31.277	19.452	19.528	16.055	17.994	23.437	16.676
	34.706	32.916	22.364	21.294	15.46	20.466	13.567	15.604
	23.61	32.457	25.202	16.137	19.242	16.453	20.349	16.834
	27.859	32.359	30.18	17.563	18.169	15.831	15.864	20.206
	33.482	36.843	30.602	18.162	20.068	29.806	22.406	18.706
	24.442	31.783	27.66	23.097	11.986	18.706	14.544	21.912
	28.544	21.954	29.396	21.294	16.959	19.187	15.114	13.262
	33.514	22.611	33.165	20.868	18.4	15.722	20.101	17.267
	29.704	36.775	26.529	18.564	25.228	18.5	15.731	15.123
	25.53	34.4	24.371	23.217	19.352	14.938	18.162	15.63
	25.426	26.802	24.027	24.414	20.556	22.541	16.453	19.569
	31.047	44.756	29.436	16.226	22.441	20.147	19.589	16.477
	32.777	27.674	27.983	16.477	23.704	15.663	15.655	15.989
	23.358	32.926	27.674	34.538	17.93	25.94	14.912	15.253
	32.737	28.082	26.969	20.33	18.292	16.834	23.806	15.114
	27.983	30.718	19.696	25.843	21.944	21.738	19.187	30.602
	33.098	27.488	30.889	17.013	22.014	17.901	19.242	25.312
	33.557	35.593	26.006	19.989	23.849	21.991	20.245	28.427
	26.826	27.237	29.704	21.522	20.046	17.668	17.175	14.983
	26.052	35.224	19.118	36.626	20.003	23.763	20.69	13.342
	28.353	37.377	26.978	24.527	24.597	17.193	17.273	17.114
	19.535	28.381	26.204	25.111	13.406	17.629	17.629	13.808
	37.129	28.832	14.823	22.318	18.803	25.868	18.831	18.433
	28.492	40.902	31.486	20.209	18.545	16.041	12.389	20.514
	23.482	30.234	30.735	30.108	17.353	18.245	18.386	13.133
	23.148	35.302	24.159	21.151	27.859	21.053	18.093	20.183
	38.157	23.675	24.108	20.226	19.265	17.862	18.131	15.759
	27.674	24.918	20.387	20.43	18.803	13.96	21.857	19.058
	28.852	30.546	26.611	19.13	23.639	26.631	22.671	13.711
	32.958	26.246	25.418	22.564	22.671	22.108	17.978	16.622
	33.041	24.534	18.348	21.762	13.315	22.163	23.704	18.292
	36.663	26.579	18.292	17.658	23.958	25.302	24.506	12.459
	33.641	19.238	27.647	17.042	20.963	13.521	19.121	16.705
	28.435	26.068	27.15	21.667	21.826	16.329	41.237	21.29
	25.607	23.972	23.115	23.965	16.03	17.042	16.127	16.202
	26.747	21.539	24.506	26.396	23.404	17.153	25.479	20.003
	24.931	34.492	23.675	39.716	33.358	32.748	20.831	13.133
	30.911	30.274	28.922	24.702	16.318	13.133	26.383	19.443
	33.161	21.143	23.382	25.363	17.312	19.523	21.539	21.991
	27.055	21.435	23.558	17.283	37.873	22.046	22.875	21.378
	45.712	23.389	19.319	29.366	23.259	18.442	14.73	15.759
	37.302	14.338	17.032	27.902	22.287	31.011	20.43	18.913
	34.79	26.611	18.913	22.014	21.863	15.371	29.947	17.862
	41.538	26.068	19.873	21.944	26.251	23.867	15.517	17.153
	37.524	24.144	27.61	23.175	31.898	26.346	29.947	26.592
	34.064	24.215	27.327	20.089	18.547	18.833	14.29	24.144
	30.319	28.489	25.09	16.455	22.787	34.585	11.343	16.318
	28.832	21.928	18.73	27.976	21.135	24.295	24.607	17.978
	38.803	24.786	23.145	25.715	30.734	23.136	21.52	27.15
	24.101	28.252	21.731	23.358	19.402	18.173	25.213	13.861
	26.298	40.593	37.145	24.483	26.99	24.716	23.851	22.321
	39.42	22.935	29.371	14.739	20.54	9.123	20.54	19.782
	30.461	36.288	17.123	28.962	19.392	18.863	18.547	14.739
	35.725	30.15	32.754	25.988	17.823	19.744	17.179	19.035
	26.396	32.13	21.555	26.273	21.617	21.09	17.498	17.09
	31.216	26.855	30.302	21.706	19.782	17.301	20.24	18.792
	30.546	32.373	33.804	23.995	23.447	15.46	21.045	19.185
	22.202	28.302	25.981	26.94	23.161	17.235	18.537	14.687
	24.187	35.458	30.528	26.346	25.715	22.253	22.287	20.725
	32.083	37.934	34.69	34.275	27.103	25.205	13.367	10.631
	29.277	46.935	23.161	18.629	23.867	17.4	13.223	17.312
	26.069	35.387	34.453	24.295	19.194	24.295	17.312	14.932
	31.676	44.389	20.54	29.536	19.744	19.859	29.569	20.4
	34.091	36.794	23.61	25.205	29.433	18.904	18.588	21.942
	28.67	27.915	19.782	24.992	21.306	25.364	17.135	18.371
	24.908	31.892	25.819	20.972	21.611	28.744	16.172	15.447
	35.955	27.963	34.358	30.302	27.51	21.661	15.348	16.172
	29.723	35.409	24.908	21.234	17.462	29.89	21.413	23.07
	34.624	27.529	24.908	22.795	19.523	26.577	33.252	18.014
	40.282	25.811	29.915	25.722	26.219	14.687	20.174	19.782
	28.51	31.116	28.234	24.607	17.123	24.506	36.96	16.219
	34.871	34.124	28.14	17.961	23.675	27.859	20.465	14.881
	41.656	26.396	34.624	21.281	23.167	26.298	21.863	18.34
	31.512	37.585	24.623	29.011	23.972	22.845	13.816	23.07
	35.128	38.214	19.539	24.534	16.539	18.433	17.791	19.402
	24.692	35.371	25.988	27.252	23.025	24.258	22.08	21.849
	25.722	33.033	19.637	29.82	26.611	32.621	17.4	16.127
	36.161	50.727	21.449	23.145	17.668	19.381	24.695	17.393
	33.492	19.539	16.487	26.715	22.663	33.145	13.661	15.416
	43.027	27.145	20.127	17.123	24.931	20.354	19.69	15.043
	31.024	39.953	32.905	25.09	20.914	16.951	21.738	23.588
	22.787	30.816	17.09	18.73	26.068	26.533	21.595	12.555
	33.984	29.512	22.321	32.573	24.08	23.145	19.873	14.858
	30.528	27.61	35.869	22.973	13.521	25.261	16.244	16.318
	33.119	30.234	22.905	28.148	20.781	15.315	32.895	24.215
	21.846	22.935	24.144	18.348	18.572	19.934	31.414	20.226
	23.995	24.973	24.59	18.442	19.558	23.755	19.55	16.159
	35.997	30.911	26.001	19.873	14.12	17.273	15.977	9.47
	25.959	36.884	24.279	17.619	17.862	20.387	17.432	15.605
	22.807	34.547	19.699	25.111	16.581	25.587	12.486	13.25
	29.366	33.932	29.159	23.965	18.235	20.286	24.215	14.506
	45.238	27.497	19.202	22.913	21.151	21.151	23.675	15.955
	34.206	26.533	25.499	22.163	17.032	17.93	16.828	13.661
	34.472	31.737	28.688	19.629	20.69	26.081	22.046	11.892
	27.703	26.167	30.866	24.279	28.802	22.387	21.857	23.763
	36.418	23.382	20.656	23.675	22.929	17.862	14.589	17.343
	42.307	19.699	33.636	28.975	21.626	14.144	13.761	14.974
	48.577	36.963	34.889	31.216	20.24	26.533	19.977	20.656
	34.246	24.952	27.321	20.831	14.881	13.719	17.521	16.798
	25.09	29.774	23.293	26.383	19.715	25.782	18.433	10.829
	35.483	29.165	21.762	26.377	17.694	22.862	12.569	24.6
	55.955	29.629	25.607	18.216	22.627	19.898	18.693	19.773
	36.228	29.059	40.495	40.348	23.529	26.288	18.876	21.555
	40.337	23.316	18.545	21.306	24.87	18.257	25.282	27.362
	21.378	25.761	34.457	20.202	31.049	15.447	35.946	13.65
	38.98	37.794	26.167	23.875	23.39	13.566	24.336	22.862
	24.215	31.1	22.487	17.961	17.961	16.967	17.123	26.447
	29.716	29.159	22.845	27.082	25.401	35.565	24.908	19.637
	35.317	27.908	24.89	20.716	23.358	23.086	19.715	27.215
	31.546	35.555	24.931	21.449	18.246	14.881	19.637	23.553
	30.234	35.185	21.053	26.919	21.626	18.046	19.035	30.969
	31.282	23.965	27.378	15.753	36.161	17.823	20.475	18.516
	34.211	33.933	20.072	25.213	23.218	18.954	20.051	17.694
	23.994	23.317	27.313	26.577	27.446	22.736	24.908	24.607
	31.392	24.716	27.103	27.187	27.145	22.795	15.595	15.946
	38.134	31.651	18.537	17.168	30.169	22.287	20.771	18.183
	24.224	26.976	16.603	24.53	21.413	22.661	18.914	19.304
	33.645	36.789	20.651	16.808	20.174	20.54	17.694	19.627
	31.049	28.45	26.069	18.014		17.791	27.103	19.782
	33.119	32.136	26.741	25.22			23.851	13.137
	33.6	32.42	22.795				20.54
	43.257	27.25	19.075				24.877
	30.895	25.7	22.995				16.967
	35.458	36.419	25.476				33.027
	37.33	29.1	24.692				22.627
	34.119	27.812	24.066				19.244
	31.898	28.463	18.547				30.783
	32.626	21.449	17.705				18.954
	32.184	26.569	23.739				18.588
	31.808	24.908					14.958
	33.004						16.876
	42.401
E. Circularity of blastomere reaggregates
Ringer's 1 embryo/well	Ringer's 3 embryo/well	Ringer's+MC 3 embryo/well	L15 3 embryo/well
0.962	0.963	0.963	0.975
0.935	0.911	0.949	0.96
0.93	0.943	0.968	0.958
0.96	0.964	0.963	0.96
0.964	0.955	0.966	0.957
0.945	0.962	0.959	0.957
0.961	0.932	0.946	0.934
0.949	0.899	0.942	0.946
0.964	0.901	0.973	0.96
0.939	0.925	0.95	0.936
0.947	0.948	0.933	0.933
0.938	0.933	0.961	0.946
0.958	0.953	0.952	0.963
0.955	0.952	0.969	0.954
0.949	0.905	0.936	0.959
0.964	0.964	0.962	0.945
0.953	0.924	0.973	0.968
0.956	0.94	0.937	0.967
0.939	0.957	0.955	0.95
0.954	0.951	0.941	0.936
0.963	0.835	0.954	0.794
0.956	0.949	0.965	0.95
0.954	0.935	0.964	0.956
0.962	0.933	0.929	0.965
0.964	0.923	0.937	0.966
0.965	0.931	0.96	0.972
0.957	0.924	0.942	0.89
0.966	0.953	0.906	0.961
0.95	0.948	0.961	0.96
0.958	0.927	0.922	0.961
0.936	0.945	0.949	0.945
0.965	0.925	0.964	0.939
0.956	0.931	0.93	0.735
0.95	0.959	0.956	0.944
0.96	0.945	0.953	0.944
0.951	0.94	0.921	0.954
0.943	0.957	0.96	0.933
0.935	0.886	0.958	0.928
0.957	0.956	0.965	0.931
0.953	0.955	0.96	0.93
0.957	0.895	0.969	0.926
0.948	0.944	0.95	0.934
0.956	0.96	0.956	0.954
0.963	0.883	0.957	0.95
0.959	0.962	0.959	0.951
0.958	0.925	0.954	0.95
0.96	0.911	0.966	0.948
0.952	0.923	0.945	0.958
0.965	0.943	0.946	0.951
0.936	0.927	0.965	0.945
0.955	0.956	0.95	0.955
0.928	0.932	0.925	0.905
0.947	0.958	0.965	0.871
0.952	0.95	0.963	0.938
0.956	0.967	0.958	0.937
0.954	0.89	0.96	0.95
0.962	0.964	0.943	0.965
0.962	0.94	0.959	0.963
0.955	0.957	0.956	0.952
0.958	0.897	0.966	0.94
0.95	0.963	0.954	0.953
0.955	0.957	0.959	0.95
0.955	0.946	0.955	0.967
0.968	0.95	0.946	0.924
0.95	0.924	0.958	0.969
0.963	0.962	0.946	0.965
0.916	0.954	0.964	0.959
0.933	0.969	0.97	0.948
0.957	0.948	0.965	0.952
0.95	0.948	0.964	0.939
0.95	0.943	0.96	0.959
0.964	0.935	0.955	0.909
0.956	0.961	0.941	0.962
0.944	0.941	0.95	0.955
0.95	0.939	0.952	0.933
0.933	0.946	0.939	0.949
0.948	0.955	0.941	0.952
0.935	0.94	0.934	0.946
0.942	0.954	0.942	0.958
0.934	0.929	0.945	0.947
0.939	0.955	0.946	0.924
0.93	0.961	0.939	0.958
0.937	0.952	0.955	0.935
0.958	0.956	0.943	0.93
0.955	0.912	0.95	0.942
0.945	0.94	0.947	0.936
0.945	0.934	0.925	0.932
0.945	0.953	0.928	0.93
0.945	0.942	0.945	0.944
0.946	0.935	0.932	0.924
0.937	0.919	0.952	0.942
0.956	0.937	0.941	0.939
0.928	0.907	0.94	0.943
0.92	0.946	0.94	0.935
0.944	0.931	0.947	0.942
0.922	0.93	0.939	0.955
0.953	0.938	0.928	0.924
0.932	0.947	0.936	0.952
0.946	0.936	0.929	0.955
0.947	0.957	0.925	0.922
0.951	0.95	0.931	0.942
0.948	0.976	0.928	0.959
0.932	0.949	0.936	0.94
0.933	0.948	0.944	0.9
0.928	0.967	0.937	0.931
0.923	0.94	0.926	0.935
0.921	0.943	0.94	0.944
0.918	0.936	0.936	0.946
0.936	0.923	0.92	0.929
0.92	0.94	0.932	0.939
0.932	0.94	0.935	0.938
0.926	0.948	0.933	0.921
0.902	0.924	0.929	0.926
0.933	0.935	0.921	0.935
0.911	0.922	0.935	0.936
0.923	0.924	0.932	0.948
0.928	0.937	0.949	0.946
0.903	0.949	0.944	0.918
0.922	0.936	0.946	0.928
0.93	0.93	0.952	0.936
0.906	0.946	0.947	0.938
0.897	0.935	0.948	0.938
0.945	0.94	0.939	0.926
0.923	0.947	0.937	0.92
0.921	0.929	0.938	0.895
0.955	0.946	0.94	0.942
0.941	0.953	0.938	0.914
0.939	0.944	0.924	0.948
0.916	0.939	0.951	0.94
0.95	0.941	0.943	0.93
0.959	0.937	0.924	0.937
0.948	0.939	0.95	0.94
0.942	0.939	0.937	0.934
0.955	0.942	0.948	0.948
0.91	0.951	0.933	0.929
0.935	0.925	0.943	0.917
0.94	0.937	0.938	0.931
0.932	0.898	0.946	0.923
0.887	0.919	0.956	0.945
0.946	0.93	0.959	0.898
0.918	0.933	0.946	0.952
0.955	0.92	0.946	0.949
0.908	0.952	0.965	0.941
0.936	0.907	0.949	0.943
0.934	0.894	0.948	0.956
0.932	0.947	0.928	0.91
0.927	0.927	0.922	0.935
0.922	0.916	0.95	0.935
0.93	0.92	0.938	0.932
0.943	0.945	0.921	0.94
0.937	0.898	0.936	0.978
0.91	0.942	0.936	0.967
0.939	0.882	0.942	0.969
0.943	0.941	0.957	0.973
0.922	0.94	0.946	0.975
0.941	0.941	0.948	0.967
0.906	0.95	0.942	0.917
0.917	0.934	0.942	0.967
0.957	0.941	0.943	0.971
0.954	0.943	0.941	0.976
0.956	0.94	0.934	0.98
0.961	0.949	0.945	0.972
0.97	0.884	0.941	0.969
0.959	0.948	0.939	0.976
0.967	0.936	0.944	0.967
0.945	0.925	0.947	0.954
0.967	0.941	0.944	0.941
0.897	0.934	0.95	0.939
0.951	0.824	0.938	0.962
0.933	0.941	0.905	0.967
0.96	0.873	0.964	0.977
0.963	0.936	0.95	0.975
0.953	0.945	0.947	0.958
0.971	0.866	0.932	0.957
0.965	0.945	0.906	0.958
0.969	0.938	0.919	0.973
0.941	0.962	0.933	0.98
0.971	0.962	0.924	0.969
0.926	0.91	0.943	0.972
0.977	0.91	0.953	0.978
0.959	0.921	0.943	0.972
0.968	0.934	0.955	0.985
0.979	0.954	0.952	0.956
0.973	0.937	0.931	0.967
0.954	0.957		0.974
0.968	0.944		0.981
0.966	0.953		0.968
0.951	0.941		0.98
0.931	0.945		0.952
0.967	0.949		0.966
0.967	0.924		0.974
0.959	0.924		0.978
0.942	0.951		0.989
0.963	0.93		0.981
0.965	0.952		0.981
0.966	0.937		0.977
0.953	0.93		0.96
0.961	0.955		0.974
0.977	0.961		0.976
0.929	0.93		0.977
0.967	0.943		0.97
0.971	0.932		0.98
0.968			0.96
0.975			0.972
0.969			0.968
0.947			0.967
0.933			0.982
0.924			0.953
0.963			0.964
0.969			0.972
0.936			0.965
0.967			0.971
0.966			0.973
0.961			0.966
0.972			0.971
0.972			0.97
0.934			0.974
0.952			0.96
0.949			0.965
0.96			0.97
0.977			0.955
0.974			0.976
0.968			0.953
0.961			0.965
0.959			0.975
0.955			0.952
0.955			0.973
0.951
0.963
0.936
0.971
0.927
0.968
G. Percentage of re-aggregates expressing ntl
					in %
	Present	Absent	Total		Present	Absent	Total
Ringer's 1 embryo/well	45	11	56		80.3571	19.6429	100
Ringer's 3 embryo/well	64	0	64		100	0	100
Ringer's+MC 3 embryo/well	52	0	52		100	0	100
L15 3 embryo/well	27	48	75		36	64	100
H. Percentage of re-aggregates showing a single coherent ntl expression domain, several compact ntl-positive cell clusters, few sparse ntl positive cells or randomly scattered groups of ntl expressing cells
							in %
	single domain	compact clusters	randomly scattered cells	sparse cells	Total		single domain	compact clusters	randomly scattered cells	sparse cells	Total
Ringer's 1 embryo/well	1	0	22	22	45		2.22222	0	48.8889	48.8889	100
Ringer's 3 embryo/well	0	4	58	2	64		0	6.25	90.625	3.125	100
Ringer's+MC 3 embryo/well	0	4	44	4	52		0	7.69231	84.6154	7.69231	100
L15 3 embryo/well	7	9	0	11	27		25.9259	33.3333	0	40.7407	100
