# Supplementary material for: Zebrafish embryonic explants undergo genetically encoded self-assembly
Source: eLife. 2020 Apr 6;9:e55190. doi: 10.7554/eLife.55190 (PMC7190352; doi:10.7554/eLife.55190)
Supplement: Figure 4—source data 1. [file elife-55190-fig4-data1.xlsx]

## Sheet: Sheet1
Figure 4
B. Number of β-catenin positive nuclei vs. Cell tier from the wounding site
Cell tier from the wounding site
1	2	3	4
3	4	2	0
0	2	2	0
1	4	2	2
1	4	1	0
3	6	3	0
1	2	1	0
0	1	4	0
1	2	2	0
1	2	2	0
1	2	2	0
3	3	1	0
5	0	0	0
0	3	0	0
0	3	1	0
0	2	0	0
0	1	0	0
C. Angle of β-catenin positive nuclei
0.020384
0.339939
0.466623
0.599514
1.66611
2.04974
2.20674
2.25817
2.33733
3.18535
3.20307
4.06994
4.5467
4.57406
5.0732
5.31942
5.74691
5.93953
6.62697
6.85147
6.95031
7.20012
7.85069
7.93181
8.03371
8.12316
8.3031
9.60621
10.757
11.4261
11.5015
12.2894
12.4682
12.7799
12.9829
13.1501
13.4748
13.7663
13.833
14.5587
15.8596
16.1731
16.7221
18.5864
19.6995
20.2563
21.3919
21.5418
22.2798
22.3307
22.7604
23.7079
24.2068
24.6251
24.9936
25.0337
27.1586
27.3439
28.1005
28.6125
28.6598
29.4866
29.6959
29.9194
30.5001
33.7563
39.1448
43.4456
45.8026
46.3052
52.4376
71.1036
E. Percentage of explants with present, strongly reduced or absent pMAD2/3
	pSMAD2/3					in %
	Present	Strongly reduced	Absent	Total		Present	Strongly reduced	Absent	Total
Control	59	10	4	73		80.8219	13.6986	5.47945	100
DD-removed	8	8	14	30		26.6667	26.6667	46.6667	100
Animal pole	2	2	18	22		9.09091	9.09091	81.8182	100
G. Extended or Not-extended
					in %
	Extended	Not-extended	Total		Extended	Not-extended	Total
Control	201	27	228		88.1579	11.8421	100
DD-removed	40	35	75		53.3333	46.6667	100
Animal pole	2	40	42		4.7619	95.2381	100
H. Circularity
Control	DD-removed	Animal pole
0.801	0.901	0.939
0.98	0.903	0.955
0.928	0.887	0.952
0.975	0.96	0.929
0.889	0.887	0.94
0.723	0.835	0.922
0.721	0.791	0.947
0.668	0.79	0.948
0.735	0.972	0.975
0.851	0.941	0.976
0.975	0.961	0.977
0.751	0.906	0.974
0.887	0.935	0.98
0.822	0.91	0.969
0.844	0.907	0.981
0.825	0.962	0.986
0.903	0.945	0.986
0.884	0.872	0.982
0.853	0.888	0.976
0.823	0.884	0.971
0.773	0.845	0.964
0.752	0.902	0.985
0.944	0.837	0.978
0.841	0.947	0.977
0.939	0.89	0.973
0.845	0.904	0.947
0.854	0.861	0.971
0.886	0.938	0.978
0.803	0.859	0.968
0.891	0.9	0.97
0.951	0.909	0.961
0.895	0.93	0.973
0.897	0.89	0.97
0.925	0.955	0.972
0.818	0.933	0.96
0.94	0.917	0.954
0.919	0.917	0.951
0.979	0.831	0.914
0.884	0.964	0.891
0.945	0.846	0.948
0.731	0.965	0.932
0.879	0.971	0.96
0.817	0.906
0.796	0.888
0.815	0.921
0.774	0.94
0.894	0.97
0.71	0.95
0.753	0.959
0.876	0.927
0.701	0.953
0.783	0.934
0.978	0.96
0.852	0.805
0.917	0.906
0.717	0.9
0.726	0.954
0.83	0.969
0.859	0.853
0.807	0.889
0.677	0.937
0.764	0.965
0.795	0.759
0.786	0.87
0.907	0.894
0.935	0.956
0.944	0.909
0.68	0.901
0.735	0.95
0.813	0.828
0.691	0.95
0.858	0.967
0.947	0.966
0.843	0.908
0.575	0.959
0.683
0.841
0.863
0.78
0.586
0.616
0.783
0.584
0.853
0.93
0.851
0.945
0.952
0.931
0.862
0.911
0.948
0.784
0.938
0.62
0.735
0.901
0.512
0.978
0.673
0.754
0.82
0.722
0.918
0.98
0.75
0.9
0.847
0.828
0.918
0.842
0.877
0.845
0.861
0.792
0.778
0.708
0.96
0.81
0.864
0.729
0.697
0.779
0.714
0.791
0.795
0.692
0.789
0.775
0.591
0.743
0.798
0.731
0.974
0.966
0.915
0.688
0.694
0.714
0.729
0.607
0.787
0.754
0.54
0.843
0.916
0.826
0.903
0.904
0.898
0.885
0.832
0.855
0.864
0.889
0.909
0.791
0.799
0.817
0.868
0.919
0.887
0.845
0.723
0.7
0.831
0.812
0.819
0.893
0.88
0.926
0.942
0.765
0.849
0.726
0.723
0.852
0.837
0.928
0.891
0.81
0.861
0.836
0.962
0.832
0.827
0.839
0.916
0.887
0.917
0.805
0.894
0.791
0.639
0.952
0.772
0.813
0.809
0.639
0.928
0.882
0.825
0.636
0.896
0.822
0.762
0.832
0.834
0.861
0.821
0.679
0.91
0.863
0.822
0.847
0.711
0.621
0.816
0.663
0.669
0.725
0.606
0.886
0.836
0.678
0.81
0.917
0.854
I. Normalized extension length (%)
Control	DD-removed
44.2841	33.7205
35.0637	19.1893
45.3233	25.5528
24.471	19.4684
37.2691	30.5033
42.5663	36.0661
22.6824	31.705
34.9377	26.4221
28.7805	20.8675
27.6959	29.7161
31.6914	36.0345
30.6686	22.5727
38.0487	31.9217
42.7386	24.1638
42.2895	27.9199
10.8316	36.9603
36.6249	57.7173
38.6391	39.6239
42.5717	24.8881
38.2112	19.2727
36.2197	12.1353
33.2498	14.1443
22.9165	33.8202
47.7034	20.1782
45.9108	34.9047
50.7613	19.2718
33.2894	19.5694
13.3371	42.4748
18.395	30.0478
37.4922	22.3762
38.7044	24.466
12.5392	27.2411
47.1465	27.0763
29.9317	25.6076
28.3463	27.308
37.7453	40.6604
25.2244	29.5405
34.8293	25.2749
28.7237	14.2423
47.0555	25.27
22.1419
37.6663
29.6181
43.1826
35.4574
23.836
46.4733
34.2062
43.455
33.0907
43.6229
58.6039
46.7415
43.9774
22.7376
47.1506
41.8494
40.9375
48.6996
37.8993
46.7351
32.971
39.3985
44.2624
44.14
28.8049
30.8697
53.5469
31.6151
55.7725
50.5156
34.9958
30.982
24.2116
42.8486
16.5173
23.1323
22.1343
27.6426
51.5324
39.2097
25.9867
52.0543
51.7813
43.311
31.5906
44.7922
18.6444
37.2172
20.0621
34.5397
35.526
41.5035
37.3732
30.1493
34.5351
31.6604
36.9609
38.7936
44.3961
42.4742
29.3881
50.8414
42.3209
34.8077
37.4789
44.7576
43.5194
38.747
41.8168
26.3154
49.7966
56.4788
35.5841
37.7107
49.47
51.9902
46.3656
45.4795
55.0225
43.8555
36.217
59.4272
32.3699
25.5918
27.9585
38.5428
22.041
25.7356
24.4558
34.3277
30.5839
33.4367
34.6713
30.2995
36.97
42.2498
42.851
27.3545
36.8594
37.6831
40.1291
43.1677
35.2305
45.1588
36.8171
34.5409
42.2894
46.334
51.4345
40.1557
34.134
31.6053
30.0842
30.425
37.2103
33.9333
39.8438
29.7994
43.2338
25.9904
38.7428
39.032
50.851
45.625
33.4911
41.5574
45.5377
36.7592
44.697
39.457
47.1232
45.6489
49.27
50.1873
36.1558
47.2392
33.2628
40.0326
42.6895
40.8622
48.4303
38.9223
28.5536
49.3421
38.99
40.943
30.6523
5.30571
31.4993
43.3238
52.6769
39.2561
22.0853
37.6812
39.9531
46.1545
32.9357
24.7416
