# Supplementary material for: Zebrafish embryonic explants undergo genetically encoded self-assembly
Source: eLife. 2020 Apr 6;9:e55190. doi: 10.7554/eLife.55190 (PMC7190352; doi:10.7554/eLife.55190)
Supplement: Figure 5—figure supplement 1—source data 1. [file elife-55190-fig5-figsupp1-data1.xlsx]

## Sheet: Sheet1
Figure 5 - Supplement 1
B. Percentage of bud stage sqt (2ng) + cyc (4ng) MO YSL-injected embryos showing or not expression of mesendoderm marker genes
	sqt + cyc MO YSL-injected
					in %
	Present	Absent	Total		Present	Absent	Total
tbx6	19	1	20		95	5	100
papc	26	1	27		96.2963	3.7037	100
ntl	28	0	28		100	0	100
MyoD	19	0	19		100	0	100
sox32	3	20	23		13.0435	86.9565	100
gsc	10	18	28		35.7143	64.2857	100
hgg	12	45	57		21.0526	78.9474	100
