# Supplementary material for: Zebrafish embryonic explants undergo genetically encoded self-assembly
Source: eLife. 2020 Apr 6;9:e55190. doi: 10.7554/eLife.55190 (PMC7190352; doi:10.7554/eLife.55190)
Supplement: Figure 5—source data 1. [file elife-55190-fig5-data1.xlsx]

## Sheet: Sheet1
Figure 5
D. Percentage of pSmad2/3 positive nuclei
50% epiboly				Germ ring
Dorsal		Lateral		Dorsal		Lateral
Control MO	sqt + cyc MO	Control MO	sqt + cyc MO	Control MO	sqt + cyc MO	Control MO	sqt + cyc MO
68.1553	28.066	65.1685	21.0031	51.6995	42.5725	65.9794	18.6667
66.7851	35.8553	65.4762	15.9919	63.9399	32.41	40.1409	31.2789
67.6983	14.8352	66.4634	15.4348	69.6202	42.6396	58.4711	31.1573
50.1333	23.6527	59.3985	14.5455	75.772	67.0886	41.3725	29.9639
53.3623	38.1757	58.5542	53.6741	67.5	58.2485	48.415	36.0934
42.2908	27.6151	74.4409	43.553	55.416	22.2054	57.6112	39.267
73.4807	45.8824	56.2334	44.3636	52.7383	27.1523	69.5473	43.9394
68.3333		48.8372			45.6522	63.871
59.0234		62.9921
71.7949
E. Normalized intensity of brightest pSmad2/3 nuclei
50% epiboly																																										Germ ring
Dorsal																				Lateral																						Dorsal
Control MO											sqt + cyc MO									Control MO											sqt + cyc MO											Control MO
1.85543	1.49806	1.85174	1.37532	1.0642	0.79274	1.91328	2.03999	1.76606	2.63922		0.399136	0.508346	0.239562	0.311879	0.537964	0.430054	0.417564			2.04177		1.57488	1.34279	1.51154	1.34497	2.93341	1.65836	1.00741	1.25568		0.296548	0.236377	0.179547	0.22587	0.379452	0.344988	0.515647					0.612709	0.594737	0.534421	0.776316	1.19849	1.14688	0.696166
1.47023	1.43049	1.4666	1.17722	0.974632	0.725446	1.73618	1.9679	1.67602	2.39811		0.369923	0.472101	0.219745	0.304782	0.472819	0.364901	0.403741			1.71472		1.4935	1.29003	1.40342	1.2621	2.84521	1.62333	0.960604	1.24123		0.264756	0.225873	0.176365	0.211672	0.360027	0.335637	0.424067					0.570244	0.590272	0.529779	0.775951	1.14043	1.04703	0.610767
1.32908	1.3058	1.32238	1.09709	0.97229	0.722371	1.72606	1.79662	1.60796	2.18747		0.342574	0.410736	0.210396	0.285748	0.435276	0.340971	0.354206			1.66669		1.40282	1.24121	1.29156	1.21464	2.39671	1.50567	0.956946	1.23801		0.260598	0.196835	0.164809	0.186104	0.358967	0.328065	0.412743					0.568412	0.590208	0.491944	0.773421	1.11153	0.962671	0.608131
1.31326	1.19462	1.31158	1.01761	0.966289	0.719636	1.72058	1.64964	1.54376	2.11851		0.335985	0.376167	0.198736	0.2819	0.431072	0.277938	0.352895			1.64688		1.36097	1.19836	1.11831	1.17904	2.3656	1.44949	0.865278	1.17125		0.257072	0.196645	0.163223	0.17022	0.323213	0.317706	0.400406					0.547601	0.565897	0.459775	0.716852	1.06817	0.852829	0.57916
1.30295	1.11597	1.29992	0.985052	0.874468	0.719016	1.68656	1.62031	1.51174	2.01735		0.294414	0.366201	0.198169	0.241506	0.422953	0.272245	0.352845			1.63994		1.27474	1.1216	1.01686	1.16457	2.27234	1.44215	0.834599	1.13044		0.235782	0.193662	0.159996	0.164809	0.305652	0.292862	0.392246					0.529224	0.564465	0.44526	0.714692	1.04375	0.848402	0.56407
1.26917	1.08714	1.26545	0.952282	0.869708	0.718721	1.62641	1.45584	1.40075	1.97761		0.281311	0.359192	0.1946	0.239713	0.417814	0.26569	0.346592			1.63542		1.2201	1.11184	0.867009	1.12337	2.21318	1.42731	0.829956	1.0808		0.228927	0.192463	0.159958	0.164425	0.301005	0.29183	0.387214					0.524117	0.557083	0.438469	0.696772	1.00818	0.844312	0.551212
1.22645	1.08253	1.22446	0.949034	0.842224	0.713059	1.58934	1.43559	1.32562	1.96062		0.280231	0.355837	0.186638	0.238692	0.415996	0.264321	0.34454			1.55523		1.19151	1.08221	0.83036	1.07632	2.09923	1.38889	0.785064	1.06829		0.220026	0.187806	0.156735	0.161694	0.296314	0.288944	0.3729					0.514416	0.549116	0.430726	0.656442	1.00561	0.822006	0.541406
1.17895	1.07858	1.17541	0.908113	0.830351	0.687848	1.52585	1.42561	1.28305	1.94605		0.272231	0.348356	0.18108	0.22781	0.399278	0.26378	0.324171			1.5525		1.11245	1.057	0.829391	1.07115	1.95403	1.38607	0.737632	1.04705		0.219845	0.187322	0.152965	0.161378	0.29631	0.288353	0.371301					0.483666	0.540139	0.428236	0.650848	0.993061	0.809125	0.536882
1.17225	1.03002	1.16852	0.894259	0.804112	0.673357	1.47894	1.38906	1.2562	1.9297		0.267583	0.343824	0.178935	0.224677	0.396151	0.248913	0.317859			1.51423		1.09764	1.0411	0.821498	1.05862	1.84845	1.28422	0.721245	1.01588		0.21478	0.180065	0.149369	0.160458	0.292757	0.28808	0.367031					0.463194	0.531251	0.423723	0.634687	0.971545	0.786363	0.525158
1.16988	1.02278	1.16823	0.87948	0.746285	0.653279	1.43747	1.34859	1.20845	1.87293		0.255263	0.336418	0.168067	0.221625	0.390155	0.242844	0.31294			1.46466		1.08143	1.0232	0.819945	1.02483	1.77341	1.27259	0.697476	1.00162		0.213182	0.17806	0.144458	0.157426	0.284551	0.288022	0.366823					0.459739	0.530599	0.420935	0.634595	0.956947	0.767245	0.524352
1.11217	1.00883	1.11084	0.855244	0.745023	0.635043	1.42504	1.26399	1.1072	1.8717		0.250136	0.336152	0.157998	0.217714	0.387886	0.225113	0.310192			1.42535		1.06202	1.01707	0.813152	0.992401	1.69286	1.10703	0.689046	0.998193		0.213155	0.173702	0.142634	0.156055	0.284539	0.286761	0.366615					0.456857	0.528607	0.416821	0.623708	0.942785	0.737873	0.523016
1.08797	1.00012	1.08438	0.825888	0.737092	0.619941	1.42201	1.22667	1.048	1.86825		0.247067	0.331638	0.151853	0.21327	0.387042	0.220691	0.306244			1.40034		1.05538	0.97234	0.810429	0.991046	1.64079	1.09225	0.674013	0.995384		0.206345	0.172947	0.139241	0.150868	0.283529	0.285773	0.364661					0.450557	0.528405	0.415893	0.615638	0.926363	0.67929	0.517463
1.03379	0.985095	1.07352	0.81284	0.729866	0.600166	1.34921	1.20294	0.983475	1.69859		0.245739	0.331208	0.150058	0.212969	0.359884	0.218792	0.306221			1.37439		1.05029	0.967014	0.808113	0.972335	1.61037	1.04317	0.6635	0.995152		0.204952	0.164378	0.138814	0.150678	0.282783	0.285269	0.355364					0.446103	0.525825	0.405014	0.614747	0.891438	0.660952	0.514962
1.03056	0.958768	1.03109	0.811292	0.728284	0.593986	1.32087	1.19386	0.974547	1.67727		0.23707	0.288838	0.148359	0.20366	0.358992	0.213115	0.302139			1.37279		1.04954	0.949551	0.806068	0.925121	1.59484	1.02964	0.660809	0.992979		0.190192	0.155395	0.138323	0.150645	0.280235	0.280087	0.336641					0.444121	0.52222	0.402965	0.611238	0.883905	0.660697	0.495799
1.00645	0.95594	1.02275	0.805712	0.726816	0.591612	1.31762	1.15146	0.961037	1.65093		0.236678	0.280177	0.147432	0.199451	0.335407	0.206159	0.293066			1.34912		1.04314	0.941148	0.779643	0.918656	1.54603	0.971981	0.659091	0.979611		0.187184	0.154274	0.13764		0.270039	0.279964	0.334591					0.44383	0.522021	0.398459	0.592718	0.883513	0.652935	0.494424
0.991416	0.947706	1.00498	0.793787	0.697735	0.586457	1.29282	1.13732	0.948661	1.62597		0.232603	0.275638	0.146521	0.190038	0.331021	0.205544	0.291306			1.3031		1.01034	0.920316	0.743214	0.896802	1.54139	0.950525	0.654159	0.976198		0.176408	0.153797	0.137376		0.269843	0.265268	0.331198					0.442248	0.516736	0.396268	0.590419	0.864861	0.647047	0.487528
0.989768	0.938939	0.987439	0.786646	0.697124	0.586334	1.29072	1.12829	0.944119	1.59121		0.2288	0.272535	0.145788	0.182198	0.330044	0.201913	0.288316			1.29125		0.982915	0.914867	0.742727	0.896031	1.50909	0.929926	0.650272	0.97033		0.172593	0.153482	0.136758		0.268882	0.260615	0.321167					0.44181	0.515674	0.395297	0.588231	0.84978	0.644036	0.477722
0.965877	0.915488	0.98428	0.766133	0.691147	0.580112	1.24275	1.12219	0.924664	1.5401		0.22852	0.272225	0.144684	0.181378	0.324031	0.200303	0.283295			1.28991		0.976278	0.89487	0.727814	0.866901	1.5073	0.929757	0.637537	0.959391		0.172589	0.150942	0.136353		0.2683	0.258776	0.320765					0.439801	0.510816	0.394451	0.587179	0.844612	0.639488	0.475644
0.944135	0.908744	0.963341	0.717714	0.684063	0.578086	1.22492	1.10891	0.91701	1.49303		0.228001	0.269638	0.143354	0.178278	0.32316	0.195834	0.282244			1.18986		0.970091	0.870974	0.71791	0.863169	1.50019	0.920116	0.630831	0.950328		0.166734	0.150396	0.13527		0.266301	0.255407	0.319049					0.435559	0.509895	0.390574	0.585177	0.818145	0.638134	0.470315
0.925831	0.8854	0.941555	0.716697	0.672083	0.57293	1.20291	1.07299	0.912384	1.47596		0.225342	0.262509	0.14201	0.175124	0.316134	0.192591	0.279977			1.18695		0.94973	0.867421	0.709274	0.860904	1.49933	0.916511	0.62928	0.942444		0.166619	0.149845	0.13333		0.266251	0.255122	0.315706					0.43263	0.506047	0.3838	0.583847	0.816665	0.638101	0.465997
0.919546	0.880397	0.922615	0.696265	0.671274	0.568117	1.20084	1.07191	0.900499	1.40169		0.222259	0.259975	0.137505	0.172893	0.308428		0.276677			1.18682		0.942729	0.86029	0.696293	0.858903	1.46098	0.905203	0.624861	0.934308		0.16611	0.149259	0.132361		0.259825	0.254504	0.312433					0.427054	0.504231	0.380561	0.583576	0.802931	0.632724	0.458866
0.915335	0.880024	0.918713	0.688024	0.662222	0.549954	1.19985	1.06588	0.898254	1.3613		0.214734	0.256317	0.135304	0.170962	0.304475		0.27254			1.18445		0.941371	0.83074	0.668161	0.85816	1.45574	0.903186	0.618488	0.919245		0.16471	0.148726			0.258784	0.246659	0.311018					0.423974	0.504083	0.379085	0.57444	0.80022	0.626426	0.456479
0.915285	0.879505	0.913528	0.67217	0.660124	0.521485	1.18162	1.06073	0.886419	1.32327		0.21352	0.253585	0.134869	0.170819	0.299603		0.26908			1.16976		0.926609	0.829835	0.657574	0.854504	1.44722	0.896052	0.618367	0.918313		0.162463	0.148139			0.257291	0.243503	0.308322					0.419776	0.503887	0.377415	0.567579	0.760746	0.623665	0.456426
0.911185	0.875597	0.909736	0.6701	0.65665	0.519836	1.18122	1.05666	0.858635	1.31145		0.212295	0.253585	0.133404	0.169497	0.267872		0.265493			1.15594		0.925691	0.816348	0.6473	0.84658	1.36652	0.895082	0.615842	0.909805		0.16238	0.147861			0.256448	0.243438	0.307349					0.419069	0.496677	0.374208	0.566697	0.754576	0.621064	0.451025
0.910485	0.863621	0.909597	0.663564	0.647047	0.500718	1.18079	1.05192	0.852243	1.30974		0.21017	0.249503			0.262913		0.263987			1.15296		0.913832	0.80051	0.644068	0.835356	1.34075	0.884548	0.610739	0.896391		0.158118				0.256404	0.243334	0.305194					0.419061	0.494976	0.36575	0.565413	0.751702	0.611969	0.446416
0.908752	0.86026	0.907647	0.630903	0.645355	0.488382	1.16672	1.04366	0.847005	1.30277		0.203036	0.24762			0.261031		0.2628			1.15098		0.910158	0.788453	0.642678	0.828587	1.32562	0.871139	0.602446	0.896309		0.156675				0.255034	0.242236	0.30398					0.417545	0.492915	0.365404	0.563955	0.748593	0.6053	0.439525
0.897507	0.848334	0.906983	0.62262	0.633688	0.47866	1.11929	1.04292	0.834932	1.29902		0.199528	0.24398			0.258767		0.25756			1.14193		0.907293	0.773449	0.640018	0.78693	1.31573	0.870986	0.601926	0.879343		0.156613				0.254274	0.240698	0.300121					0.4164	0.490846	0.364494	0.560633	0.746471	0.599539	0.431158
0.872087	0.845345	0.894633	0.608279	0.618155	0.478387	1.11171	1.04191	0.834033	1.2989		0.19931	0.243441			0.258582		0.255758			1.14028		0.906595	0.771261	0.634996	0.761837	1.30084	0.862672	0.597422	0.876441		0.155402				0.251246	0.239615	0.295929					0.414881	0.490498	0.35748	0.554781	0.740295	0.593544	0.420591
0.871581	0.844357	0.874294	0.593757	0.609029	0.475952	1.08084	1.03702	0.819891	1.29575		0.190809	0.241707			0.254842		0.254472			1.13102		0.905918	0.768167	0.634123	0.758273	1.27463	0.855744	0.593372	0.875139		0.154222				0.246916	0.238496	0.295847					0.413778	0.488762	0.352542	0.554637	0.721198	0.588249	0.4204
0.870908	0.840211	0.869042	0.584525	0.595312	0.468132	1.06889	1.02808	0.796031	1.25154		0.185324	0.240517			0.254626		0.243989			1.10429		0.90563	0.763128	0.60526	0.739264	1.25294	0.834978	0.593359	0.872375		0.150748				0.246426	0.238361	0.286321					0.413728	0.485355	0.348965	0.545991	0.712906	0.579559	0.419842
0.86863	0.839687	0.866789	0.5791	0.583381	0.463933	1.06513	1.01766	0.787182	1.2473		0.183272	0.239773			0.25307		0.242978			1.06929		0.902553	0.73538	0.604456	0.710468	1.25102	0.833963	0.591511	0.863728		0.149915				0.245507	0.23421	0.283706					0.412194	0.480572	0.34714	0.543734	0.709435	0.573602	0.416237
0.85919	0.838615	0.865023	0.569717	0.579038	0.446726	1.06306	1.01418	0.777769	1.21107		0.181942	0.239759			0.249695		0.238091			1.05471		0.888768	0.734615	0.602883	0.699754	1.24374	0.828602	0.582602	0.863679		0.149058				0.245223	0.23245	0.282801					0.411798	0.479832	0.346921	0.540679	0.703078	0.572685	0.414587
0.84756	0.83639	0.862661	0.566206	0.577933	0.421032	1.05918	1.00694	0.77558	1.20532		0.181106	0.238748			0.248707		0.23794			1.04191		0.888284	0.720516	0.600058	0.689555	1.23262	0.803615	0.578132	0.858191		0.148823				0.244482	0.228743	0.28152					0.405527	0.478102	0.346835	0.532867	0.691842	0.57179	0.413692
0.847412	0.836257	0.857222	0.563328	0.575546	0.419724	1.04503	0.981657	0.775188	1.19301		0.180149				0.244454		0.227209			1.03523		0.881609	0.720398	0.58409	0.683262	1.21494	0.788384	0.574773	0.834821		0.148357				0.243148	0.22863	0.281303					0.405352	0.47526	0.346648	0.528071	0.689119	0.556416	0.40719
0.844349	0.835011	0.845233	0.562178	0.573687	0.41938	1.03154	0.9805	0.772222	1.1746		0.179542						0.222528			1.03418		0.87242	0.71015	0.569774	0.680145	1.21062	0.782681	0.559527	0.830241		0.148075				0.238897	0.227168	0.279216					0.400758	0.472446	0.345639	0.526919	0.688182	0.551557	0.405966
0.841806	0.830196	0.842452	0.5574	0.562818	0.417585	1.03025	0.968152	0.765407	1.16165		0.179253									1.03008		0.869248	0.709936	0.563422	0.671255	1.21037	0.782292	0.540756	0.829362		0.14718				0.237446	0.226947	0.276583					0.400258	0.467715	0.344425	0.525888	0.685057	0.550894	0.405641
0.839108	0.829068	0.837177	0.540636	0.561019	0.416678	1.01524	0.955105	0.765133	1.13925											1.01434		0.866667	0.70052	0.558601	0.667872	1.20945	0.771727	0.534893	0.821804		0.146839				0.237073	0.225196	0.267446					0.399323	0.465732	0.344241	0.522259	0.682124	0.549299	0.405468
0.838952	0.827781	0.833984	0.532323	0.559036	0.408568	1.01266	0.952866	0.745275	1.12745											1.00408		0.862581	0.698638	0.552299	0.666524	1.20922	0.766491	0.534492	0.808888		0.146197				0.234851	0.22395						0.39765	0.464439	0.343727	0.521886	0.681656	0.547782	0.404996
0.826728	0.82642	0.824294	0.529779	0.558955	0.40533	0.995433	0.947818	0.741667	1.12172											0.992629		0.861819	0.697134	0.547457	0.662596	1.19799	0.751841	0.525911	0.80389		0.144879				0.232876	0.223863						0.396558	0.463481	0.342808	0.520121	0.67898	0.54666	0.403156
0.819729	0.820351	0.817616	0.511675	0.554542	0.401733	0.993498	0.942488	0.740945	1.1153											0.991437		0.858735	0.696997	0.523579	0.65851	1.19159	0.751248	0.508709	0.802424		0.143824				0.231438	0.22358						0.393194	0.463007	0.340288	0.517198	0.675263	0.539626	0.398428
0.817905	0.815251	0.815952	0.51131	0.549847	0.398211	0.991026	0.936002	0.737303	1.11007											0.98757		0.854438	0.68841	0.516014	0.653542	1.18245	0.729521	0.5049	0.800207						0.226361	0.22134						0.388984	0.461146	0.340078	0.513075	0.674541	0.538336	0.398089
0.816508	0.814332	0.81528	0.507874	0.548243	0.397583	0.988242	0.934633	0.722717	1.09757											0.981814		0.85306	0.681626	0.510763	0.630856	1.1564	0.721127	0.502866	0.795241						0.225902	0.220798						0.385952	0.455787	0.339922	0.512762	0.668545	0.533555	0.398004
0.814405	0.81156	0.813209	0.505208	0.547795	0.386409	0.979751	0.899118	0.719272	1.08429											0.979963		0.852914	0.673927	0.508021	0.620922	1.15321	0.718026	0.499958	0.7904						0.224704	0.219187						0.382893	0.455019	0.337794	0.512032	0.668415	0.530953	0.39236
0.812509	0.810817	0.810293	0.495578	0.546901	0.385457	0.976702	0.893728	0.713573	1.04414											0.975017		0.836394	0.670164	0.505464	0.620095	1.11843	0.68256	0.494066	0.787249						0.223168	0.218746						0.379285	0.454231	0.336585	0.511918	0.660367	0.530621	0.392206
0.805609	0.810811	0.804435	0.486329	0.546757	0.380501	0.971452	0.883161	0.709375	1.03899											0.970886		0.826391	0.66841	0.496336	0.616837	1.10065	0.680892	0.489887	0.786782						0.220689	0.21379						0.37676	0.452005	0.335298	0.511688	0.659827	0.529844	0.390964
0.805411	0.800579	0.803307	0.48174	0.544554	0.376339	0.957901	0.852778	0.706199	1.03578											0.961611		0.824208	0.66605	0.491556	0.613906	1.06719	0.679078	0.481582	0.778043						0.220187	0.213608						0.372461	0.450791	0.333388	0.511137	0.658647	0.522521	0.39083
0.800133	0.797892	0.798186	0.473725	0.54452	0.376027	0.950657	0.851927	0.703704	1.03332											0.94969		0.822545	0.661096	0.480559	0.612997	1.05342	0.669332	0.480422	0.777538						0.219416							0.369873	0.450409	0.332685	0.508525	0.65646	0.52107	0.387119
0.799835	0.788601	0.783676	0.466064	0.538365	0.371811	0.939745	0.83228	0.702947	1.03252											0.934635		0.819607	0.657213		0.612438	1.03401	0.658649	0.479498	0.771664						0.217132							0.361109	0.448571	0.331132	0.507736	0.651561	0.516002	0.382666
0.78823	0.787689	0.782724	0.456305	0.538362	0.371383	0.927253	0.821352	0.700219	1.02362											0.926128		0.809757	0.651248		0.612166	1.02435	0.644479	0.477392	0.770381						0.216845							0.360892	0.446584	0.330724	0.507351	0.641053	0.514572	0.381942
0.785346	0.76304	0.775476	0.455642	0.529124	0.37093	0.906361	0.817145	0.692792	1.01873											0.914144		0.808619	0.643376		0.5862	0.986955	0.640827	0.476945	0.763182						0.216816							0.354782	0.445277	0.32784	0.5044	0.639456	0.509992	0.378632
0.77694	0.758069	0.771328	0.447873	0.526689	0.36994	0.904734	0.78708	0.683433	1.01546											0.905252		0.804835	0.629485		0.585364	0.952367	0.63559	0.466143	0.757268													0.352075	0.444777	0.325717	0.504303	0.636167	0.508191	0.377391
0.775788	0.734476	0.770514	0.446241	0.521855	0.369263	0.895891	0.78291	0.681365	0.95691											0.898749		0.802784	0.614346		0.579875	0.951533	0.613016	0.46507	0.750961													0.350135	0.444104	0.321315	0.503756	0.626946	0.502162	0.374034
0.775689	0.726267	0.769631	0.441497	0.517829	0.365895	0.894738	0.776264	0.67826	0.945243											0.895701		0.792714	0.599493		0.56427	0.932585	0.597819	0.458859	0.742488													0.349749	0.440016	0.320866	0.502712	0.621835	0.498051	0.372106
0.771716	0.720735	0.768563	0.441111	0.51457	0.362535	0.892163	0.769356	0.67606	0.93356											0.891309		0.792434	0.576028		0.547822	0.906759	0.579505	0.455495	0.737519													0.348514	0.439766	0.316376	0.498154	0.614227	0.495887	0.365347
0.770312	0.718879	0.766335	0.43645	0.514315	0.358898	0.871333	0.747065	0.673006	0.930966											0.891038		0.774897	0.567368		0.547642	0.898045	0.5763	0.451366	0.732283													0.348052	0.439048	0.316	0.497251	0.610308	0.493021	0.359685
0.768236	0.71878	0.746506	0.425793	0.511975	0.351214	0.856248	0.745558	0.659039	0.917258											0.885959		0.769661	0.564109		0.544564	0.869222	0.575487	0.443431	0.728306													0.346438	0.43643	0.315221	0.493284	0.608086	0.491284	0.359452
0.747821	0.711116	0.745683		0.509662	0.347534	0.855663	0.727121	0.653176	0.91347											0.88064		0.764284	0.562211		0.538176	0.866057	0.564812	0.440842	0.727843													0.344533	0.435369	0.313991	0.487501	0.607372	0.48627	0.358194
0.740501	0.709556	0.739237		0.500196	0.347016	0.832015	0.725038	0.646741	0.906535											0.880178		0.761574	0.560861		0.535412	0.865722	0.556638	0.440427	0.726161													0.343414	0.434623	0.311474	0.486274	0.606023	0.479982	0.355327
0.738001	0.707862	0.73518		0.500014		0.826026	0.720872	0.645285	0.894008											0.861405		0.760997	0.551279		0.524345	0.861987	0.550095	0.439737	0.724436													0.343093	0.432981	0.311336	0.484537	0.604006	0.479254	0.353312
0.73739	0.704733	0.733747		0.498256		0.820029	0.697243	0.639876	0.892214											0.857899		0.756663	0.548006		0.523743	0.858032	0.545495	0.439361	0.719496													0.340971	0.430731	0.305375	0.484457	0.603495	0.476676	0.348521
0.735814	0.696492	0.731138		0.494157		0.812041	0.694943	0.639831	0.881853											0.852774		0.752296	0.546016		0.522667	0.85587	0.545101	0.437928	0.718621													0.337643	0.430245	0.305083	0.484406	0.597639	0.474032	0.348286
0.731311	0.695538	0.728634		0.492491		0.8101	0.69457	0.635613	0.876401											0.845181		0.748214	0.544327		0.520681	0.851379	0.526014	0.437221	0.717994													0.335762	0.429855	0.303874	0.484035	0.593009	0.468451	0.348113
0.729425	0.690426	0.727052		0.491556		0.805275		0.633644	0.873554											0.837069		0.746819	0.542462		0.508175	0.842977	0.525132	0.431834	0.716362													0.334115	0.429836	0.302693	0.483713	0.590857	0.466564	0.346206
0.728142	0.688522	0.726631		0.468427		0.799689		0.626709	0.86594											0.814093		0.74165	0.540575		0.505882	0.842076	0.523952	0.422678	0.715196													0.332162	0.42829	0.30221	0.482934	0.588916	0.466556	0.341712
0.725875	0.686475	0.724636		0.466308		0.792252		0.623206	0.858316											0.807321		0.739228	0.533351		0.505122	0.812125		0.418617	0.709124													0.330952	0.428042	0.301781	0.481284	0.588215	0.465871	0.335456
0.725854	0.685921	0.724462		0.46384		0.7867		0.621069	0.856356											0.802925		0.735929			0.485964	0.782471		0.417297	0.704602													0.330293	0.426657	0.300862	0.478822		0.465773	0.333307
0.724198	0.679534	0.719028		0.461036		0.774485		0.614667	0.85173											0.789411		0.732278			0.479397	0.781494		0.415733	0.703121													0.327503	0.424602		0.477567		0.45989	0.331861
0.718934	0.678447	0.71886		0.458418		0.773246		0.608703	0.849639											0.784847		0.727229			0.479263	0.775036		0.413839	0.701836													0.326244	0.424193		0.477435		0.459533	0.330698
0.718105	0.677947	0.717118		0.456322		0.772797		0.607266	0.847588											0.780828		0.718267			0.472306	0.774107		0.411693	0.701733													0.323993	0.422469		0.474575		0.453564	0.33058
0.71383	0.676764	0.71525		0.45628		0.771794		0.60326	0.841115											0.779887		0.710983			0.470485			0.408631	0.700291													0.322822	0.422166		0.473394		0.452816	0.320536
0.709611	0.675471	0.712676		0.451129		0.756717		0.602854	0.837571											0.776394		0.710102			0.469945			0.407745	0.699686													0.322768	0.421688		0.4692		0.452052	0.319777
0.707756	0.661189	0.708435		0.450068		0.754004		0.596413	0.822936											0.771376		0.706581			0.459101			0.406487	0.699013													0.3205	0.421296		0.468122		0.451877	0.319766
0.692442	0.656529	0.708301		0.444459		0.752681		0.596339	0.821263											0.759162		0.70129			0.457591			0.403895	0.697906													0.319354	0.421273		0.464597		0.451495	0.319565
0.682084	0.653944	0.705313		0.441703		0.746512		0.584509	0.782768											0.758242		0.700381						0.402417	0.688979													0.318274	0.421198		0.461933		0.450858	0.318955
0.681329	0.652594	0.687224				0.741832		0.575838	0.781545											0.757523		0.700011						0.398056	0.687432													0.316819	0.418732		0.461269		0.450645	0.318811
0.671543	0.649108	0.680833				0.740297		0.573121	0.772023											0.732168		0.696985						0.394472	0.682465													0.315955	0.417892		0.460429		0.450011	0.315394
0.668954	0.648067	0.680219				0.73265		0.571646												0.72169		0.692566						0.393559	0.677566													0.31369	0.41736		0.460385		0.449005	0.311673
0.668425	0.643755	0.670256				0.729141		0.565875												0.717112		0.687177						0.392985	0.673081													0.313656	0.417288		0.460311		0.446777	0.311187
0.667972	0.633766	0.666985				0.716341		0.56327												0.716592		0.677341						0.391847	0.671561													0.312622	0.417176		0.460137		0.44589
0.665371	0.630657	0.666352						0.562299												0.715747		0.677126						0.389822	0.669926													0.312097	0.416965		0.459093		0.444921
0.661312	0.625907	0.665231						0.558034												0.702458		0.67624						0.388321	0.668543													0.311949	0.411069		0.459088		0.444396
0.661247	0.617804	0.664125						0.557295												0.700016		0.672109						0.386321	0.668034													0.309499	0.410227		0.457874		0.442971
0.653785	0.611581	0.658461						0.556742												0.68592		0.664812							0.667981													0.308781	0.409938		0.45772		0.438959
0.649555	0.611179	0.655967																		0.685412									0.658558													0.308588	0.409432		0.453933		0.437742
0.648915	0.610095	0.651372																		0.685015									0.656749													0.307532	0.408141		0.452222		0.433251
0.648178	0.609528	0.647581																		0.68108									0.65502													0.305779	0.407771		0.450887		0.433044
0.644732	0.607654	0.645824																		0.671213									0.654994													0.304771	0.407769		0.450681		0.43303
0.64375	0.603327	0.64497																		0.666874									0.654011														0.406095		0.44928		0.431551
0.637092	0.600737	0.642843																		0.665895									0.651804														0.403562		0.448796		0.429768
0.636392	0.596443	0.64279																		0.649055									0.64884														0.402557		0.448094		0.429328
0.635952	0.592898	0.635309																		0.646914									0.644763														0.402281		0.44792		0.4285
0.630401	0.589011	0.633728																		0.642102									0.640766														0.401127		0.447627		0.427476
0.630117	0.586807	0.632612																		0.636665									0.639712														0.399989		0.444903		0.426792
0.62927	0.582298	0.629063																		0.63364									0.637304														0.39936		0.441711		0.424017
0.628776	0.58052	0.62896																		0.631981									0.631822														0.399322		0.437612		0.423753
0.627663	0.580434	0.627736																		0.630015									0.624227														0.397668		0.430425		0.418484
0.61756	0.579416	0.627168																		0.626601																							0.393591				0.418136
0.616557	0.575372	0.626792																		0.625027																							0.391693				0.416799
0.614896	0.574912	0.61483																		0.624491																							0.390676				0.414519
0.613139	0.571383	0.613778																		0.623673																							0.39056				0.41232
0.60759	0.568456	0.613507																		0.606168																							0.389039				0.411179
0.607156	0.567619	0.611538																		0.600148																							0.388225				0.409637
0.606348	0.563182	0.606274																		0.599829																							0.386002				0.405525
0.603495	0.562647	0.605374																		0.598274																							0.382575				0.404333
0.582791	0.560591	0.602931																																									0.381972				0.402463
	0.558403																																										0.381089				0.402243
	0.555061																																										0.381069
	0.547919																																										0.380677
	0.544547																																										0.380164
	0.544367																																										0.379599
	0.528764																																										0.378797
	0.52582																																										0.378711
	0.525503																																										0.377692
																																											0.372197
																																											0.371783
F. Normalized intensity of positive pSmad2/3 nuclei vs. Cell tier from the YSL (Dorsal)
50% epiboly																																													Germ ring
Dorsal view
Control MO																									sqt + cyc MO																				Control MO
Ratio	Distance	Ratio	Distance	Ratio	Distance	Ratio	Distance	Ratio	Distance	Ratio	Distance	Ratio	Distance	Ratio	Distance	Ratio	Distance	Ratio	Distance	Distance Bin (um)	Cell tier	AVG	SD		Ratio	Distance	Ratio	Distance	Ratio	Distance	Ratio	Distance	Ratio	Distance	Ratio	Distance	Ratio	Distance	Distance Bin (um)	Cell tier	AVG	SD			Ratio	Distance	Ratio	Distance	Ratio
1.22645	0	0.81156	0	1.22446	0	0.825888	0	0.562818	0	0.713059	0	1.22492	0	1.10891	0	0.944119	0	2.11851	0	15	1	0.930901	0.392375		0.294414	3.1963	0.253585	0	0.144684	0	0.167639	0	0.422953	0	0.218792	6.77554	0.220099	0	15	1	0.224598	0.0952352			0.411798	0	0.432981	0	0.254273
0.915335	0.0737791	0.880397	1.25156	0.913528	0.0737791	1.17722	2.05225	0.546757	4.36282	0.719636	4.85363	0.991026	1.087	0.936002	0.330199	0.787182	0.821783	2.63922	0.0376028	30	2	0.659603	0.277247		0.115177	3.6489	0.376167	4.22717	0.157998	0.200694	0.212969	2.82172	0.316134	4.48175	0.106381	7.98884	0.276677	0.783784	30	2	0.204313	0.0853027			0.164692	0.16558	0.440016	1.77014	0.380561
0.965877	0.989407	0.835011	1.57871	0.963341	0.989407	0.908113	2.60446	0.538365	4.39989	0.37093	5.25522	1.62641	1.13718	0.934633	0.671785	1.048	1.12355	1.30974	1.51814	45	3	0.455332	0.193901		0.399136	3.66652	0.241707	5.17215	0.186638	0.29487	0.221625	2.88873	0.12673	5.53812	0.364901	9.32732	0.195074	1.29161	45	3	0.177066	0.0632393			0.304525	1.52079	0.379599	3.22628	0.213664
1.31326	1.14913	0.653944	1.68993	1.31158	1.14913	0.952282	6.57348	0.549847	4.79547	0.722371	5.44107	1.01524	1.21861	1.45584	0.895439	0.948661	1.47519	1.5401	2.75991	60	4	0.347089	0.145273		0.23707	7.13803	0.172223	5.84585	0.239562	2.0314	0.21327	3.09854	0.244454	5.59771	0.277938	10.1834	0.181942	2.54281	60	4	0.159593	0.0523127			0.302631	2.44249	0.43643	5.05691	0.178643
1.11217	2.83776	0.726267	2.04399	1.11084	2.83776	0.766133	8.10601	0.575546	5.41572	0.673357	6.11497	1.11929	1.38202	1.22667	1.77684	1.60796	2.16332	1.97761	3.65834	75	5	0.256936	0.109938		0.19931	7.29915	0.259975	6.46174	0.210396	5.06772	0.285748	4.05045	0.304475	6.57038	0.430054	10.4869	0.263987	3.34094	75	5	0.148392	0.0378963			0.44181	2.61004	0.504083	5.15161	0.420935
0.911185	3.61489	0.810817	2.16218	0.909736	3.61489	0.949034	8.17662	0.511975	6.26917	0.463933	6.87686	1.72606	2.09206	1.04292	2.43341	0.796031	2.44233	1.25154	4.07091	90	6	0.202093	0.0801807		0.222259	8.30094	0.116056	7.31216	0.112496	6.72961	0.178278	4.68379	0.396151	8.62713	0.152964	11.4128	0.157104	5.4142	90	6	0.135588	0.0336193			0.385952	2.9274	0.525825	6.25316	0.302693
1.85543	3.65461	0.788601	2.97272	1.85174	3.65461	0.5791	9.43517	0.546901	7.70237	0.568117	7.30947	1.68655	3.22477	1.20294	3.30847	1.20845	2.62997	1.67727	4.60514	105	7	0.170593	0.0612267		0.236678	8.70497	0.472101	7.80266	0.133404	6.77716	0.104315	5.17649	0.390155	9.56148	0.171929	11.7632	0.200855	5.75317	105	7	0.125727	0.0156228			0.354782	3.6673	0.411069	7.81307	0.278362
0.910485	4.2807	0.838615	3.8749	0.719028	4.04843	1.37532	9.67287	0.554542	7.70846	0.687848	7.83419	1.58934	4.09549	0.747065	3.34707	0.886419	3.19848	1.62597	5.17509	120	8	0.151259	0.0452062		0.245739	9.95446	0.139426	7.80888	0.130687	7.07503	0.311879	5.4635	0.417814	9.79507	0.101919	12.0073	0.195918	5.83849	120	8	0.114595	0.00992193			0.28465	4.02877	0.418732	8.41638	0.241429
1.08797	4.49705	0.958768	3.88583	0.906983	4.2807	0.793787	10.645	0.491556	7.75215	0.549954	8.32463	1.18079	4.6353	1.12829	3.86356	0.681365	4.00186	1.59121	5.75087	135	9	0.13116	0.0313617		0.267583	11.4272	0.253585	8.49285	0.108662	7.24546	0.2819	7.04446	0.208243	10.6712	0.175591	12.3629	0.352845	6.7756	135	9	0.120808	0.0176167			0.413778	4.85167	0.450409	9.24199	0.438469
0.731311	4.52384	0.656529	4.0754	0.874294	4.36571	0.663564	11.8333	0.647047	7.99145	0.718721	8.34465	1.42201	4.90356	1.38906	4.19331	1.28305	4.63294	1.2473	5.75586	150	10	0.110178	0.000811774		0.179253	11.6007	0.136685	9.58727	0.198169	7.97699	0.199451	7.32665	0.472819	10.8454	0.105749	12.374	0.146188	7.39273	150	10	0.12995	0			0.514416	4.94318	0.467715	9.4576	0.459775
0.908752	5.10716	0.113959	4.81028	1.08438	4.49705	0.786646	13.0737	0.745023	8.08607	0.47866	8.60418	1.43747	5.58362	1.6203	4.28106	1.67602	5.03496	1.3613	6.06746						0.130278	12.0518	0.280177	10.8563	0.198736	8.74562	0.141278	7.32779	0.537964	11.558	0.105961	13.0841	0.222528	7.39331							0.463194	5.31722	0.407771	9.6742	0.32784
1.47023	5.93631	0.711116	4.86317	0.728634	4.52384	0.985052	13.4588	0.444459	8.34228	0.408568	8.95808	1.91328	5.97858	0.9805	4.30296	0.355835	5.16117	1.96062	6.3035						0.121376	12.3178	0.366201	11.9816	0.219745	9.66172	0.169497	7.58785	0.261031	12.1232	0.192591	15.1193	0.310192	7.42567							0.529224	5.47431	0.429855	10.0102	0.161185
0.872087	5.99249	0.677947	4.93629	0.907647	5.10716	1.09709	13.9173	0.393139	9.56459	0.593986	9.48145	1.32087	6.91173	0.821352	4.34146	0.765133	6.47791	1.29902	7.65953						0.10277	13.6995	0.234079	12.3026	0.1946	9.80958	0.129874	8.07522	0.335407	12.153	0.157654	15.6524	0.254472	7.4666							0.419061	5.78006	0.368238	10.534	0.374208
1.17895	7.41133	1.00012	5.13653	1.4666	5.93631	0.87948	13.9829	0.869708	9.61219	0.619941	10.2127	0.892163	7.36405	1.04191	5.54551	0.473033	7.03225	2.39811	7.7887						0.149939	13.8238	0.224885	12.3287	0.143354	10.2237	0.143343	8.41482	0.258767	14.0159	0.264321	16.6041	0.139096	7.92426							0.350135	6.29519	0.478102	10.6027	0.337794
1.26917	7.48271	0.675471	5.31127	0.869042	5.99249	0.81284	14.0803	0.97229	9.78232	0.586457	11.3495	0.988242	7.95842	1.02808	5.86548	0.565875	7.10542	1.69859	8.36566						0.110699	14.2042	0.359192	13.0694	0.108165	10.8174	0.109986	9.06045	0.144041	15.9375	0.201913	17.0964	0.184103	8.72709							0.442248	6.62796	0.362018	10.8188	0.153955
1.00645	7.73099	1.02278	5.50453	1.07352	7.38374	0.593757	14.473	0.494157	9.9161	0.57293	11.966	0.773246	8.37818	1.06588	6.08313	0.497308	7.30334	1.31145	8.52214						0.181106	14.3	0.336418	13.1909	0.121306	12.0721	0.238692	9.07254	0.387042	16.0908	0.169065	17.3559	0.25756	8.89896							0.459739	6.83269	0.422469	10.862	0.316
1.16988	7.73967	0.704733	6.02449	1.17541	7.41133	0.855244	15.5342	0.492491	10.1736	0.725446	12.156	1.06889	8.41805	0.952866	6.42537	0.91701	7.69862	1.9297	8.69723						0.232603	14.5804	0.410736	13.2831	0.18108	12.0867	0.304782	12.0359	0.387886	16.2734	0.272245	17.7018	0.182518	8.98955							0.444121	6.97955	0.590272	11.3148	0.34714
1.30295	7.83333	1.07859	6.11158	1.26545	7.48271	0.5574	15.8399	0.728284	10.2957	0.397583	13.2741	1.20084	8.64623	1.01766	6.97536	0.713573	7.82421	1.87293	8.98494						0.228001	14.583	0.355837	13.615	0.104957	13.1462	0.121886	12.579	0.415996	16.3488	0.108886	21.2728	0.15394	8.99013							0.227719	7.18855	0.557083	11.4601	0.377415
0.814405	8.41144	0.985095	7.07645	1.00498	7.73099	1.01761	15.9128	0.561019	10.5009	0.635043	13.3899	1.24275	8.93672	0.947818	7.63098	0.898254	7.88638	1.86825	9.13138						0.132508	14.7468	0.24762	13.8355	0.108657	15.5913	0.129774	13.812	0.17896	17.0215	0.205544	21.3205	0.306244	9.38852							0.337643	7.2084	0.455787	11.4665	0.242026
0.607156	8.77339	0.423433	7.47701	1.16823	7.73967	0.540636	16.1194	1.0642	11.5892	0.351214	13.6184	1.72058	8.93834	0.942488	8.69816	0.475171	8.186	1.2989	9.43767						0.161725	15.0837	0.343824	13.921	0.178935	17.4374	0.106554	14.4641	0.235698	17.7184	0.116313	22.1686	0.130507	9.56714							0.456857	7.41907	0.192291	11.6866	0.395297
0.735814	10.0734	0.472664	7.68073	1.29993	7.83333	0.717714	16.1902	0.842224	11.613	0.417585	14.0986	1.11171	9.14222	1.04366	9.03359	0.983475	8.59341	1.08429	9.63041						0.140757	15.9021	0.508346	15.2909	0.131144	17.9408	0.170819	14.7272	0.330044	18.2501	0.126099	23.1429	0.227209	10.7091							0.177794	7.74514	0.380164	11.8352	0.176107
0.61756	10.0916	0.76304	7.85925	0.813209	8.41144	0.62262	17.1935	0.830351	11.6941	0.229102	14.6084	0.446814	9.26203	1.64964	9.10063	0.974547	9.08854	1.8717	10.0018						0.116224	16.4504	0.272535	15.4926	0.116333	18.6809	0.14322	15.5517	0.200262	18.3963	0.248913	25.408	0.324171	10.7606							0.524117	8.35077	0.381069	12.8181	0.301781
0.826728	10.3315	0.609528	8.35923	0.606274	8.77339	0.456305	17.5606	0.662222	11.8876	0.79274	14.9608	1.03025	9.66324	0.769356	9.12708	0.700219	9.09387	2.18747	10.1491						0.169897	16.6552	0.348356	15.5745	0.168067	20.2812	0.224677	16.0674	0.399278	18.5591	0.206159	25.9438	0.306221	13.0516							0.612709	8.84717	0.417892	12.8273	0.232641
0.775788	10.4075	0.439145	8.65682	0.733747	10.0734	0.811292	18.5252	0.54452	11.9245	0.600166	16.4805	0.906361	9.91565	1.12219	9.38548	1.54376	9.77706	1.03579	11.5359						0.369923	16.7667	0.133876	16.8605	0.12063	23.9302	0.128155	16.2092	0.138354	20.7889	0.242844	26.0269	0.279977	15.4737							0.265435	8.96954	0.421296	12.9552	0.325717
0.77694	10.6972	0.844357	9.92675	0.61483	10.0916	0.486329	18.9576	0.458418	12.1544	0.210868	17.444	1.73617	10.0569	0.883161	9.58841	0.719272	9.9207	0.945243	12.8778						0.139388	17.7774	0.238748	17.5191	0.104777	24.2633	0.239713	16.7763	0.156772	20.8822	0.137474	26.5851	0.238091	16.102							0.209735	9.15113	0.564465	13.0282	0.173115
0.819729	10.8934	0.827781	9.99798	0.824294	10.3315	0.441497	18.9928	0.526689	12.2886	0.521485	17.5538	1.19985	10.0734	1.05666	9.88951	0.737303	10.1407	1.11007	13.1619						0.212295	18.5941	0.239773	17.7473	0.106776	25.9373	0.217714	17.8758	0.435276	21.1092	0.143599	26.8808	0.417564	18.0775							0.312097	9.38994	0.480572	13.1815	0.21758
0.747821	11.0663	0.586807	10.237	0.771328	10.4075	0.608279	19.3821	0.618155	13.2475	0.500718	17.5777	0.708572	10.1342	1.06073	10.0888	0.474173	10.4665	1.13925	14.3241						0.124481	18.8531	0.331208	18.2134	0.102709	26.5838	0.145354	18.0926	0.258582	21.2862	0.26378	28.0933	0.221595	18.7147							0.483666	9.69959	0.346561	13.27	0.36575
0.944135	11.1344	0.611179	10.6635	0.775476	10.6972	0.292198	19.4228	0.386124	13.6508	0.285746	18.0684	1.18162	10.272	1.42561	10.3893	0.621069	11.2791	1.65093	14.5357						0.190809	19.0257	0.256317	18.2621	0.122979	26.5968	0.139845	19.8343	0.431072	23.0835	0.113526	30.5123	0.34454	18.9821							0.446103	9.78079	0.506047	13.3487	0.348965
0.718105	11.4317	0.696492	10.7711	0.817616	10.8934	0.505208	19.9959	0.361635	13.8193	0.586334	18.3338	1.34921	10.2873	0.981657	10.4908	0.834932	11.3031	1.49303	14.7469						0.112675	19.0419	0.194325	18.3025	0.120577	27.9994	0.148656	19.8919	0.23765	23.2876	0.213115	31.0653	0.106641	19.0612							0.396558	9.82052	0.402557	13.3671	0.416821
0.476705	11.8945	0.607654	10.8587	0.746506	11.0663	0.566206	20.2036	0.514315	14.1184	0.488382	18.3403	1.31762	10.3335	1.00694	10.8184	0.645285	11.312	0.85173	15.4513						0.180149	20.0023	0.262509	18.8395	0.133376	28.2146	0.20366	20.0475	0.248707	24.8188	0.129843	32.6313	0.163735	19.1385							0.240362	9.86504	0.378711	13.7342	0.390574
0.925831	12.0428	0.810811	11.3538	0.941555	11.1344	0.447873	20.2421	0.544554	14.6278	0.40533	18.5091	1.47894	10.6576	0.955105	11.3204	1.40075	11.5995	1.03332	15.8285						0.1058	20.2135	0.223289	19.022	0.14201	30.2595	0.22781	20.4675	0.163351	26.0195	0.185523	32.9188	0.403741	19.9119							0.450557	10.2905	0.355698	13.8829	0.344425
0.770312	12.239	0.845345	11.3639	0.717118	11.4317	0.6701	20.3649	0.697735	14.7634	0.478387	18.7755	0.855663	10.8134	0.69457	11.4571	0.852243	11.8605	1.12172	16.606						0.250136	20.4077	0.134301	19.7093	0.114195	31.9858	0.172893	21.2971	0.138094	26.2585	0.225113	34.1793	0.181773	20.075							0.12148	10.4407	0.301811	13.8993	0.364494
0.919546	12.5234	0.611581	11.8299	0.474691	11.8945	0.805712	20.5145	0.573687	14.7673	0.653279	18.7838	1.29282	11.1571	1.07191	11.5133	0.483635	12.272	0.917258	16.6716						0.135479	20.7377	0.240517	19.8222	0.100733	33.0874	0.149329	22.113	0.101453	26.3448	0.147419	34.7354	0.108072	20.4719							0.311949	10.6898	0.406095	14.2265	0.251893
0.567694	12.9432	0.830196	12.1955	0.922615	12.0428	0.357408	21.806	0.804112	14.7987	0.578086	19.0412	0.826026	11.1731	0.5867	12.4632	0.329364	12.5654	1.29575	16.7594						0.108362	20.9276	0.187675	19.9633	0.113372	38.8738	0.163974	22.5437	0.199481	26.8143	0.148379	35.4566	0.190163	22.0068							0.419069	11.919	0.490498	14.4668	0.2485
0.841806	13.0235	0.42179	12.4717	0.768563	12.239	0.466064	22.0691	0.414977	15.2712	0.271027	19.3465	0.233805	11.6354	1.79662	12.5705	0.306311	12.7814	1.04414	16.8797						0.199528	21.3567	0.22444	19.9879	0.150058	40.3996	0.133435	22.8162	0.124934	28.8333	0.105924	35.8842	0.141191	22.9018							0.308588	12.3386	0.346289	14.8061	0.423723
0.85919	13.3284	0.487427	12.5646	0.918713	12.5234	0.569717	22.173	0.529124	15.4785	0.591612	19.4202	0.993498	11.989	1.43559	12.6872	1.32562	12.9803	1.20532	17.1686						0.109693	22.4016	0.272225	21.8832	0.118732	41.1278	0.106502	23.8435	0.267872	29.6842	0.200303	37.9167	0.26908	23.4684							0.405352	12.4423	0.522021	14.8508	0.297681
0.718934	13.959	1.08714	12.6143	0.566573	12.9432	0.67217	22.2729	0.538362	15.4839	0.41938	19.9422	0.771794	12.0247	0.626763	13.128	0.77558	13.15	1.1746	17.4367						0.342574	22.7641	0.336152	22.2694	0.104786	43.4814	0.133908	24.2095	0.129167	29.7077	0.220691	38.0489	0.200234	24.8435							0.400758	12.8304	0.494976	15.3117	0.405014
1.17225	14.0696	0.505768	13.1098	0.857222	13.3284	0.43645	22.9931	0.966289	15.5121	0.33064	20.1456	0.516987	12.4181	1.01418	13.6766	0.512334	14.2361	1.12745	18.1117						0.122205	23.0187	0.170567	23.108	0.124864	44.007	0.144449	25.8341	0.358992	30.2414	0.120717	38.0511	0.31294	25.3044							0.233928	12.9205	0.503887	15.4447	0.44526
0.805609	14.1313	0.511585	13.1121	0.71525	13.959	0.532323	23.3641	0.517829	16.2257	0.329122	20.3155	1.01266	12.5539	2.04	14.1128	0.740945	14.3378	0.91347	18.156						0.2288	23.0675	0.249503	23.4732	0.105848	44.4843	0.175124	26.3087	0.219986	30.3102	0.340971	38.1484	0.162902	25.4172							0.372461	13.64	0.393591	15.477	0.491944
0.630117	15.1948	0.648067	13.2036	1.16852	14.0696	0.511675	23.5133	0.595312	16.4506	0.376339	20.8427	0.904734	12.8611	0.817145	14.1309	0.556742	14.6028	1.21108	18.4702						0.173903	23.091	0.151199	24.2512	0.12598	47.2597	0.241506	28.3124	0.105443	30.8204	0.171681	38.6707	0.302139	25.8638							0.282758	13.8031	0.378797	15.5103	0.3838
1.03379	15.4726	0.797892	13.7568	0.804435	14.1313	0.630903	24.2905	0.37614	16.4831	0.446726	22.15	0.705099	13.2041	1.03702	14.1458	1.76606	15.0932	1.47596	18.6534						0.121292	24.1073	0.107696	24.2992	0.12236	48.2404	0.142034	29.68	0.229742	31.6446	0.161171	40.4938	0.282244	26.5108							0.192074	13.8655	0.353845	15.5895	0.428236
0.692442	15.8824	0.840211	14.0071	0.111114	14.43	0.417565	25.6198	0.359795	16.5522	0.369263	22.7743	0.894738	13.4825	1.26399	14.4795	0.673006	15.1296	0.906535	18.7337						0.280231	24.2517	0.196295	25.4606	0.147432	48.7475	0.110196	31.5053	0.215231	32.0423	0.15755	40.5409	0.135715	26.6267							0.547601	13.9427	0.401127	15.9849	0.206866
0.817905	16.205	0.558403	14.1667	0.62896	15.1948	0.716697	25.6369	0.521855	16.8776	0.29003	22.8191	0.716341	14.4404	0.78708	14.6195	0.775188	15.9807	1.03899	19.67						0.22852	25.8009	0.331638	26.7575	0.114286	49.8326	0.190038	32.8969	0.204094	32.3753	0.26569	41.1035	0.352895	26.7963							0.28837	13.958	0.381089	16.0928	0.365404
0.536857	16.9537	1.3058	14.297	1.03109	15.4726	0.379833	25.7242	0.974632	17.0732	0.303528	22.8718	0.614202	14.4965	0.968152	15.131	0.314404	16.3451	1.09757	20.1837						0.170746	25.9603	0.100697	26.8505	0.126365	51.0327	0.102612	33.2648	0.108316	32.5127	0.128448	41.787	0.293066	28.8869							0.289609	14.8256	0.318746	16.4353	0.258223
0.725854	17.1963	0.592898	14.3027	0.687224	15.8824	0.455642	25.7536	0.509662	17.3096	0.36994	23.0719	1.04503	14.9536	0.725038	17.2534	0.777769	16.3513	0.86594	20.3915						0.13904	26.203	0.106461	26.8585	0.116193	51.1629	0.10418	34.428	0.308428	33.0093	0.162372	42.6759	0.265493	29.2975							0.305779	14.9041	0.515674	16.9246	0.295719
0.812509	17.8752	0.468893	14.3312	0.815952	16.205	0.48174	25.9569	0.500196	17.4256	0.307234	23.0798	0.588046	15.1945	0.776264	17.3625	0.607266	16.4367	1.16164	21.071						0.179542	26.371	0.215828	26.8897	0.109945	52.1773	0.144503	34.6324	0.194982	34.7647	0.15342	45.2344	0.27254	30.8441							0.344533	15.1405	0.510816	17.24	0.534421
0.84756	17.9974	1.11598	15.1993	0.535338	16.9537	0.409921	25.9611	0.43827	17.8065	0.268536	23.5459	0.976702	15.3916	1.19386	17.4685	0.741667	16.5462	0.660452	21.1075						0.247067	27.7241	0.229237	27.0504	0.124323	54.0256	0.103408	36.2381	0.225652	35.1125	0.192291	45.4159	0.158974	31.8945							0.4164	15.753	0.403562	17.3092	0.260481
0.991416	18.2224	0.563182	15.3235	0.724636	17.1963	0.423124	26.1169	0.389444	18.3566	0.285035	23.855	0.729141	16.5119	1.13732	17.641	0.847005	16.6045	0.93356	21.2135						0.111562	27.9699	0.176094	27.0506	0.102305	56.574	0.134141	36.7308	0.190829	35.6102	0.124051	46.6313	0.243989	32.526							0.399323	16.0794	0.472446	18.1666	0.294419
0.668425	18.2444	0.679534	15.459	0.810293	17.8752	0.562178	26.3907	0.229058	18.4368	0.519836	23.9908	1.03154	16.7019	1.05192	17.6878	0.961037	16.6135	1.01873	21.4917						0.133475	28.1574	0.158059	27.1913	0.148359	60.9883	0.141201	38.5972	0.117841	36.4176	0.152698	48.2475	0.23794	32.6926							0.334115	16.2422	0.346269	18.1686	0.272067
0.707756	18.5537	0.544547	16.1141	0.845233	17.9974	0.495578	26.7539	0.324889	19.3259	0.358898	24.4257	1.42504	17.47	1.9679	17.9932	0.573121	16.9818	1.19301	21.6611						0.281311	28.3531	0.275638	27.443	0.151853	61.1716	0.104179	38.8758	0.324031	37.2364	0.162014	49.6573	0.288316	33.6592							0.315955	16.9659	0.361339	18.2262	0.313991
1.03056	18.5655	0.787689	16.2446	0.987439	18.2224	0.507874	27.5816	0.729866	19.386	0.719016	24.4623	0.895891	18.2522	0.83228	18.2519	0.683433	17.5676	0.881853	21.7762						0.129348	30.1907	0.169265	27.4982	0.110967	65.592	0.157553	39.2909	0.254842	37.4219	0.138485	50.2325	0.146645	33.8717							0.221288	17.0051	0.399989	18.2333	0.339922
1.32908	18.7531	0.630657	16.2523	0.666985	18.2444	0.529779	28.5805	0.238209	19.6377	0.380501	24.6388	0.552041	18.2624	0.78291	18.3523	0.461818	17.8215	0.772023	22.0663						0.272231	30.7664	0.243441	30.2117	0.123564	66.1183	0.120852	39.7568	0.234611	39.1537	0.115201	50.6962	0.194944	34.3915							0.313656	17.1502	0.530599	18.3346	0.240498
0.71383	18.8989	0.439476	16.4253	0.705313	18.5537	0.894259	28.6233	0.456322	19.7551	0.365895	24.7512	1.05918	18.3483	0.459539	19.3295	0.320758	17.8421	0.764914	22.1019						0.157451	30.9793	0.239759	31.3708	0.13127	71.8904	0.181378	39.893	0.139688	39.2526	0.160595	54.06	0.160071	34.7612							0.322768	17.7446	0.389039	18.5184	0.332685
0.62927	19.1984	0.575372	16.5016	1.02275	18.5655	0.222935	28.7323	0.746285	19.7976	0.271289	24.7743	0.694578	19.4183	0.467617	19.8022	0.519954	17.8706	0.873554	22.2156						0.104793	31.5142	0.148218	31.5998	0.120152	72.3526	0.142822	40.1968	0.32316	39.7916	0.195834	56.5271	0.115365	34.7749							0.195461	17.8835	0.444104	18.5994	0.333388
0.728142	19.2192	0.525503	16.6364	1.32238	18.7531	0.308428	29.1653	0.277336	19.9608	0.580112	24.9469	0.648925	19.7612	0.669109	20.3007	0.623206	18.0222	0.930966	22.3519						0.113908	31.7775	0.168847	32.9381	0.110859	73.9949	0.158527	40.3691	0.121676	39.8532	0.113134	57.0203	0.12226	35.4316							0.224533	17.8882	0.283034	18.705	0.315221
0.847412	19.44	0.815251	16.6951	0.712676	18.8989	0.37875	29.2298	0.684063	20.4981	0.475952	25.1606	1.16672	20.0252	1.15146	20.8499	0.437027	18.0374	0.781545	22.4547						0.255263	31.883	0.160084	33.3268	0.135304	75.9433	0.146746	40.7113	0.237894	39.8559	0.188223	58.4753	0.192312	35.8935							0.125281	17.9871	0.426657	18.9094	0.35748
0.771716	19.5842	0.512231	16.8064	0.627736	19.1984	0.696265	29.7575	0.671274	20.8802	0.2997	25.4125	0.543828	20.2697	1.34859	20.9863	0.511737	18.0757	0.821263	22.6779						0.138955	32.928	0.23819	33.4567	0.110833	77.8177	0.170962	42.0592	0.165843	40.035	0.171856	59.0294	0.13469	36.3156							0.332162	18.1921	0.430731	19.1721	0.398459
0.816508	19.7897	0.690426	17.4957	0.727052	19.2192	0.38003	29.9685	0.645355	21.2962	0.468132	25.5452	0.792252	20.5931	0.664655	21.9437	1.51174	18.2567	0.841115	22.8827						0.14015	33.7547	0.148527	34.4849	0.137505	79.0074	0.182198	42.1897	0.229028	40.509	0.155134	61.1005	0.2628	36.8725							0.427054	18.3841	0.407769	19.3055	0.22206
0.838952	20.2253	1.43049	17.5189	0.708435	19.5609	0.365403	30.0965	0.874468	21.5003	0.216404	25.6729	0.626802	20.7164	0.521049	21.9645	0.722717	18.4897	0.597408	23.0739						0.12133	34.3823	0.12655	34.9343	0.134869	84.6654	0.113114	42.4943	0.191957	40.6595	0.153277	61.5686	0.354206	37.1152							0.413728	18.8143	0.454231	19.5646	0.346835
0.725875	20.6521	0.758069	18.0162	0.770514	19.5842	0.177195	30.3356	0.298061	21.6645	0.421032	26.3003	1.08084	20.8873	0.899118	22.0532	0.364788	18.5169	0.758495	23.3781						0.138188	34.4933	0.187962	35.778	0.122193	86.3183	0.130709	44.2029	0.359884	41.1524	0.110582	64.1283	0.101279	39.4989							0.102469	19.0842	0.397668	19.7394	0.311336
0.738001	20.6605	0.879505	18.2233	0.81528	19.7897	0.51131	30.7076	0.399068	21.9693	0.143932	26.4278	0.117911	21.1566	0.648136	22.1714	0.702947	18.8691	0.876401	23.5082						0.181942	35.223	0.210143	36.1714	0.109882	86.534	0.106958	44.3418	0.227718	42.1473	0.136856	70.9886	0.194813	40.5904							0.288554	19.5286	0.485355	19.8232	0.340078
0.385345	20.7258	1.49806	18.2602	0.833984	20.2253	0.688024	31.1304	0.609029	22.3102	0.385457	27.0961	0.402149	21.2762	0.508211	22.2503	0.639831	18.8721	0.837571	23.5368						0.185324	35.7114	0.1464	36.3507	0.146521	92.8377	0.113889	46.2715	0.120207	43.4972	0.148853	76.5021	0.179203	42.2881							0.212356	19.7077	0.463007	19.8675	0.170742
0.606348	21.3601	0.908744	19.1213	0.724462	20.6521	0.363478	31.2292	0.672083	22.3472	0.376027	27.633	0.713084	21.4556	0.57644	22.3567	0.43001	18.967	0.892214	23.991						0.21352	36.1136	0.288838	36.6939	0.110532	95.3318	0.105237	51.4807	0.232335	43.5496	0.166971	81.554	0.206729	43.0797							0.265887	20.4348	0.315072	20.2708	0.258703
0.64375	21.3951	0.509731	19.1853	0.731138	20.6605	0.415626	31.2299	0.304509	22.6461	0.274776	27.8043	0.979751	21.4699	1.07299	22.7198	0.448867	19.1914	1.01546	24.4341						0.164765	36.6215	0.126467	36.7449	0.120857	95.4143	0.135666	51.7342	0.172364	45.494	0.122006	111.077	0.283295	44.155							0.309499	20.4506	0.450791	20.2779	0.342808
0.839108	21.5914	0.567619	19.3286	0.380571	20.7258	0.288634	31.277	0.318764	22.9704	0.235922	28.4939	0.774485	21.6989	0.638566	23.0877	0.858635	19.302	0.767954	24.7316						0.158084	38.0451	0.140361	37.7557	0.103293	95.5621	0.123225	53.2342	0.172166	47.6173	0.111715	111.24	0.14281	44.4652							0.319354	20.6429	0.39936	20.4262	0.352542
0.564326	21.692	1.19462	19.4667	0.605374	21.3601	0.257931	31.3167	0.377207	22.9728	0.140072	29.8464	0.756717	21.8041	0.720872	23.2185	0.265235	19.7817	2.01735	24.9438						0.109624	38.4909	0.14839	39.5594	0.123297	97.2808	0.134834	54.4841	0.152776	47.9995	0.101441	129.055	0.178596	44.7727							0.423974	20.8043	0.371296	20.6771	0.233921
0.681329	22.1908	0.863621	20.081	0.642843	21.3951	0.233835	31.6757	0.224957	23.8377	0.201507	29.9039	1.52585	21.9482	0.553641	23.482	0.481538	20.9012	1.94605	25.0597						0.225342	39.0094	0.158065	44.4643	0.120589	100.894	0.115627	56.7568	0.331021	48.2497			0.130787	46.4907							0.570244	20.9863	0.348997	20.6873	0.225263
0.636392	22.4735	0.836257	20.1323	0.837177	21.5914	0.33912	32.5543	0.406743	24.0322	0.153556	30.1495	0.66116	22.1833	0.852778	23.5653	0.67826	21.034	1.03252	25.1932						0.21017	39.4799	0.123708	46.2913	0.121918	100.956	0.123188	57.3774	0.13353	48.3411			0.291306	47.161							0.154538	21.1121	0.496677	20.7813	0.171513
0.561178	22.5479	0.473395	20.3146	0.563131	21.692	0.425793	32.6753	0.466308	24.4262	0.14567	30.989	1.29071	22.3517	0.260679	25.1746	0.765407	21.4982	0.822936	25.2348						0.176206	39.6301	0.147589	47.0551	0.11234	101.976	0.110444	57.699	0.299603	48.4585			0.155699	49.902							0.43263	21.1475	0.326014	20.8795	0.340288
0.668954	22.9685	0.589011	20.4624	0.680219	22.1908	0.326518	33.1414	0.468427	24.5831	0.171973	31.0327	0.641192	22.5358	0.571605	25.4825	0.584509	21.5126	1.30277	25.5622						0.335985	39.9503	0.146243	48.4874	0.120395	105.078	0.139662	59.2066	0.225201	50.8106			0.164583	49.9037							0.340971	21.4273	0.111942	21.9858	0.278238
0.648915	23.1237	0.709556	20.5618	0.633728	22.4735	0.584525	33.1698	0.498256	24.8551	0.297911	31.3378	1.06513	22.8088	0.745558	25.7668	0.184656	21.6393	1.1153	25.6438						0.104116	40.021	0.148546	52.7911	0.10271	107.112	0.102769	59.8712	0.194904	51.9449			0.121857	51.8406							0.296569	21.4354	0.429836	22.0225	0.311474
0.805411	23.8623	0.875597	20.6435	0.559078	22.5479	0.399247	33.374	0.450068	24.8895	0.371383	31.7953	0.805275	22.8332	0.635395	25.8782	0.510051	22.1393	0.858316	25.7409						0.214734	40.3017	0.186243	52.9658	0.125986	109.316	0.104379	60.2521	0.144979	52.1161			0.209384	52.301							0.293095	21.4495	0.391693	22.3018	0.394451
0.517236	23.8641	0.800579	20.952	0.666352	22.9685	0.366163	33.4083	0.461036	24.9242	0.221919	32.5123	0.608922	23.0478	0.581706	26.3359	0.282276	22.213	0.894008	25.8407						0.177084	40.6976	0.140636	53.9333	0.115574	111.276	0.102833	61.0466	0.155445	53.5473			0.242978	53.2301							0.246048	21.6226	0.594737	22.8031	0.255206
0.709611	23.9847	0.357557	21.0468	0.645824	23.1237	0.329495	33.9421	0.737092	25.1588	0.187008	32.7319	0.7867	23.231	0.727121	27.8149	0.912384	22.8739	0.712571	27.5769						0.183272	40.7053	0.24398	54.3409	0.102568	119.699	0.114833	63.2397	0.19413	53.5616			0.222119	53.5213							0.222069	21.783	0.314201	22.8534	0.415893
0.800133	24.0163	0.633766	21.1972	0.745683	23.3438	0.194781	34.3011	0.583381	25.3297	0.362535	33.7042	0.535676	23.39	0.52289	27.9346	0.602854	23.0782	0.849639	27.6409						0.103339	42.0113	0.170475	55.2493	0.108168	121.139	0.107553	64.5204	0.127267	53.9263			0.205306	54.5002							0.2383	21.8374	0.317836	23.1821	0.331132
0.724198	24.3877	0.485527	21.3301	0.803307	23.8623	0.250713	34.3247	0.697124	25.3804	0.333687	33.817	0.552327	24.051	0.551507	28.1784	0.276341	23.3583	0.721994	28.1298						0.11842	43.836	0.113516	55.7668	0.115681	122.15	0.107564	65.9898	0.117409	54.0543			0.136011	56.3701							0.216945	22.0558	0.488762	23.3452	0.256204
0.613139	24.8131	1.00883	21.362	0.516161	23.8641	0.268038	34.5961	0.46384	25.6174	0.272347	33.9533	0.740297	24.2212	0.425605	28.5595	1.2562	23.5694	1.40169	28.4091						0.110764	43.9252	0.193356	57.8889	0.118496	123.154	0.100389	68.617	0.124227	54.1839			0.118187	57.0418							0.405527	22.236	0.424602	23.5011	0.430726
0.729425	24.8178	0.707862	21.4992	0.708301	23.9847	0.272145	35.5524	0.691147	25.8453	0.206062	34.0828	0.269549	24.3698	0.418962	29.8625	0.819891	23.8314	0.742077	28.6131						0.203036	45.0096	0.137164	58.1812	0.117939	125.121	0.113635	74.5712	0.25307	54.5675			0.133862	57.2709							0.414881	22.8742	0.342894	23.6142	0.293329
0.567746	25.0004	0.676764	21.6603	0.71886	24.3877	0.563328	36.9913	0.354723	27.1913	0.234697	34.1836	0.871333	24.9933	0.427467	30.0505	0.706199	24.2326	0.856356	28.6574						0.107434	45.0558	0.20484	61.6145	0.145788	127.69	0.113548	84.2011	0.227558	54.6469			0.180347	57.4525							0.283852	23.0535	0.465732	23.716	0.117627
0.556483	25.2265	0.947706	21.7669	0.611538	24.8131	0.473725	37.3494	0.294041	27.2801	0.347016	34.2903	0.705366	25.503	0.577075	30.9816	0.596339	24.64	0.609555	29.524						0.150903	45.7482	0.172393	61.6534	0.107734	128.003	0.114802	86.1736	0.216182	56.3524			0.317859	59.0303							0.285057	23.4576	0.41736	23.7709	0.290402
0.86863	25.4177	0.499168	21.7823	0.726631	24.8178	0.301116	37.3512	0.548243	27.4025	0.243278	34.4341	0.494309	25.8337	0.893728	31.1615	0.233422	25.1161	0.551565	29.9405						0.159126	45.798	0.131751	64.0113	0.112431	128.028			0.176466	57.3409			0.346592	59.346							0.288832	24.4836	0.452005	23.8343	0.305375
0.54364	25.6146	0.720735	21.9044	0.566715	25.0004	0.250631	38.3971	0.437464	27.6759	0.144432	35.1149	0.674122	25.9135	0.851927	31.2195	0.335337	25.2181	0.657463	29.9736						0.173321	45.7991	0.178558	67.105					0.262913	57.5995			0.17268	61.6521							0.295464	24.6287	0.331643	23.8858	0.293769
0.785346	25.7669	0.86026	21.9811	0.553795	25.2265	0.2193	38.3977	0.577933	27.7989	0.152351	35.1412	0.939745	26.3607	0.5854	31.2274	0.105357	25.2804	0.635994	30.2961						0.13231	45.812	0.127537	67.1543					0.113516	58.9524			0.186324	61.6721							0.195148	24.7523	0.528607	23.9847	0.13714
0.799835	26.2791	0.71878	22.0153	0.865023	25.4177	0.373219	38.9808	0.347233	27.9859	0.108649	36.0857	0.458965	27.4785	0.490742	31.5145	0.379338	26.0811	0.660793	31.4835						0.167663	46.6805	0.127612	67.7853					0.254626	59.4172			0.161927	61.9831							0.272416	24.9059	0.409432	24.1283	0.264815
0.989768	26.4313	0.500454	22.3929	0.542174	25.6146	0.332587	39.5144	0.390248	27.9872	0.419724	36.3449	0.391398	28.0487	0.446869	32.1321	0.772222	26.1776	0.691943	32.6409						0.15831	46.8275	0.171244	67.9674					0.139032	60.3401			0.202239	62.9446							0.439801	24.9786	0.252461	24.2786	0.330724
0.424973	26.5374	0.453368	22.5222	0.782724	25.7669	0.334644	39.6952	0.352594	28.0143	0.316902	36.6972	1.20291	28.1657	0.438751	32.1677	0.450123	26.1977	0.486446	32.779						0.117111	47.4343	0.155321	69.6189					0.147886	60.6353			0.147395	63.8347							0.267893	25.6687	0.422166	24.3328	0.303874
0.768236	26.6538	0.366804	22.6357	0.798186	26.2791	0.248559	39.9725	0.345127	28.1746	0.200955	36.8034	0.41233	28.6698	0.512779	34.5614	0.398782	26.2523	0.641618	32.9231						0.172339	47.7252	0.12792	70.2341					0.220647	61.2189			0.207961	64.5594							0.382893	26.3246	0.416965	24.391	0.300862
0.549107	26.7842	0.568456	22.8964	0.98428	26.4313	0.292263	41.14	0.375763	28.2243	0.416678	36.9209	1.06307	28.756	0.565339	35.2057	0.209401	26.8327	0.510031	32.9316						0.129835	47.7295	0.116431	71.9488					0.195387	61.6186			0.209122	65.6804							0.330952	26.5339	0.448571	24.4016	0.345639
0.915285	26.9516	0.938939	23.0191	0.419664	26.5374	0.446241	41.468	0.267755	28.4034	0.120485	37.7919	0.772797	28.8074	0.58773	35.211	0.56327	27.0514	0.682361	32.9929						0.125564	51.4072	0.138646	76.4144					0.168507	61.7777			0.171209	65.688							0.213204	26.5572	0.399322	24.8356	0.335298
0.871581	27.0328	0.516395	23.0224	0.766335	26.6538	0.251693	41.7237	0.392455	28.5408	0.121185	38.2302	0.754004	29.0559	0.301153	35.2591	0.745275	27.1085	0.499653	33.0422						0.109526	51.5824	0.18012	78.1585					0.170999	62.6847			0.188022	66.7589							0.369873	26.8233	0.337274	24.9236	0.227839
0.648178	27.4987	0.368721	23.2259	0.546588	26.7842	0.30044	42.2719	0.385731	28.6856	0.148535	38.3894	0.347891	29.1021	0.425179	35.4338	0.659039	27.4772	0.95691	33.8622						0.122016	51.9119	0.131962	78.8695					0.249695	64.9693			0.13417	66.8114							0.318274	27.1263	0.39056	25.427	0.336585
0.616557	27.694	0.83639	23.6749	0.909597	26.9516	0.347345	43.0237	0.51457	28.96	0.16863	38.5784	0.8101	29.2309	0.658745	35.4381	0.646741	27.5978	0.468014	33.936						0.145972	52.2098	0.108319	82.194					0.130439	66.7707			0.150691	71.1423							0.44383	27.4226	0.492915	25.4297	0.284055
0.3064	27.8653	0.562647	23.7065	0.862661	27.0328	0.244006	43.2624	0.206472	29.0805	0.10131	38.9298	0.417404	29.3394	0.694943	35.9457	0.440176	27.6123	0.487215	34.3082						0.153943	52.7143	0.172528	84.3212					0.170692	68.9554			0.148208	71.1554							0.343414	27.878	0.409938	25.5366	0.321315
0.628776	27.9492	0.82642	23.7446	0.64497	27.4987	0.346542	43.3382	0.424198	29.5715	0.386409	39.0897	0.532141	29.428	0.5451	36.941	0.635613	28.1958	0.117886	34.8572						0.112927	53.0364	0.150302	84.3297					0.117531	69.1283			0.255758	71.861							0.278219	28.0012	0.410227	25.5561	0.272042
0.460141	28.0455	0.484237	24.5726	0.613778	27.694	0.317529	43.4839	0.364338	30.0295	0.247775	39.1767	0.752681	29.636	0.318583	36.9946	0.653176	29.2322	0.588402	34.9998						0.13881	53.6669	0.11367	84.5294					0.161741	69.6749			0.183957	74.7408							0.289435	28.3126	0.352679	25.5963	0.279238
0.544356	29.0809	0.839687	25.2746	0.297966	27.8653	0.156059	44.1761	0.559036	30.2906	0.308797	39.3606	0.15448	29.7657	0.697243	37.0724	0.457751	29.429	0.401072	35.0973						0.141697	55.3466	0.193123	86.0522					0.146826	69.9818			0.106738	78.1197							0.164581	28.455	0.421688	25.6933	0.316376
0.558352	29.9305	0.814332	25.4302	0.627168	27.9492	0.193765	44.3859	0.633688	30.4853	0.23485	39.7191	0.404967	30.1387	0.543438	37.7913	0.703704	29.8225	0.782768	35.1483						0.130271	56.1706	0.119807	86.114					0.187053	69.9908			0.130741	78.5832							0.304771	28.8405	0.435369	25.9613	0.157103
0.503088	30.2107	0.464473	25.4503	0.451977	28.0455	0.441111	44.5692	0.374059	31.0494	0.398211	39.905	0.927253	30.2286	0.384614	38.385	0.322837	29.9854	0.601208	35.2426						0.140001	56.8641	0.269638	86.1231					0.196083	72.1472			0.149602	78.5889							0.271404	28.9871	0.444777	25.9668	0.175314
0.485085	30.233	0.600737	25.4842	0.543474	29.0809	0.379629	44.6241	0.312942	31.3315	0.254966	40.0505	0.432001	30.3789	0.514892	38.3957	0.67606	30.0198	1.32328	35.3961						0.127208	57.488	0.134044	87.8281					0.12723	74.5425			0.135885	79.0951							0.393194	29.1103	0.464439	26.0178	0.22565
0.535227	30.3933	0.43079	25.4901	0.557168	29.9305	0.26557	44.8704	0.65665	31.4092	0.196144	40.309	0.856248	30.798	0.358322	39.3246	0.432467	30.0611	0.555087	35.4001						0.146993	58.1351	0.107448	93.7987					0.163869	75.8464			0.102878	80.4011							0.283067	29.1979	0.367111	26.0525	0.30221
0.582791	30.4221	0.416508	25.6885	0.500496	30.2107	0.403839	44.9258	0.219719	31.7601	0.208922	40.4577	0.62645	31.2504	0.332877	40.4434	0.558034	30.327	0.651658	35.8209						0.107474	58.5775	0.130505	94.9436					0.125504	78.13			0.184228	81.2234							0.179073	29.4949	0.257907	26.4033	0.402965
0.451165	30.9561	0.476334	25.9141	0.477251	30.233	0.332558	45.0047	0.236749	32.2557	0.31282	41.256	0.677817	31.5148	0.296545	41.4863	0.60326	30.4754	0.718331	36.0224						0.118886	59.3014	0.130899	101.207					0.16497	83.9943			0.177667	81.6289							0.348052	29.7919	0.300284	26.4137	0.346921
0.637092	31.1129	0.649108	26.51	0.531657	30.3933	0.331711	45.6137	0.319272	32.3603	0.347534	41.8976	0.73265	31.8415	0.490449	42.3105	0.626709	30.4865	0.588289	36.3656						0.109016	62.3708	0.115418	105.186					0.121729	84.09			0.129874	84.6976							0.281308	30.1703	0.386002	26.4473	0.396268
0.661247	31.7724	0.571383	26.518	0.580794	30.4221	0.258464	46.1494	0.726816	32.5639	0.162943	42.1969	0.493303	31.9204	0.327177	42.7618	0.900499	30.7546	0.701512	36.79						0.112435	62.7923	0.117845	107.57					0.102971	86.767			0.100788	86.4055							0.250673	30.2744	0.445277	26.5002	0.229492
0.78823	31.9399	0.848334	26.9132	0.449915	30.9561	0.237532	46.7012	0.332541	32.6058	0.186529	42.3538	0.609222	32.1639	0.156175	42.9419	0.709375	31.144	0.445564	37.3543						0.121157	65.8016	0.11112	111.606					0.116751	89.6084			0.171492	89.6056							0.419776	30.5227	0.300656	26.6135	0.188293
0.635952	31.9746	0.52582	26.942	0.635309	31.1129	0.282674	47.0534	0.387109	32.6842	0.269926	42.4832	0.455983	32.2269	0.61687	43.2327	0.571646	31.776	0.536977	37.5863						0.100028	68.7092	0.101126	113.549					0.153588	91.3266			0.13386	90.3598							0.568412	30.7031	0.565897	26.7625	0.233583
0.406489	32.4811	0.302454	27.2016	0.655967	31.7724	0.17086	47.1476	0.547795	32.7281	0.249255	43.7268	0.570042	32.3811	0.520851	43.5519	0.485383	31.8285	0.533837	37.7452						0.110016	69.0203	0.132884	123.136					0.127869	92.1208			0.152888	92.6392							0.216447	30.8313	0.388225	26.7698	0.247563
0.630401	32.5149	0.434414	27.5697	0.783676	31.9399	0.261345	47.2179	0.276344	32.7956	0.172883	44.2701	0.619736	32.9761	0.311644	43.7887	0.231184	32.2322	0.661014	37.883						0.105321	72.4133	0.103382	131.447					0.123108	95.4227			0.143297	94.908							0.276326	31.095	0.549116	26.9994	0.343727
0.775689	32.7206	0.429987	28.1548	0.632612	31.9746	0.340532	47.3048	0.427885	33.0522	0.169762	45.0155	0.245545	33.407	0.372938	43.9878	0.273132	32.4692	0.578917	37.8838						0.114022	72.8428	0.12995	135.075					0.119863	95.6127			0.127239	95.0964							0.18967	31.1338	0.516736	27.2413	0.280189
0.52258	32.9347	0.718879	28.7	0.405385	32.4811	0.27522	47.4249	0.350764	33.1995	0.170083	45.2112	0.799689	34.8332	0.595932	43.9984	0.692792	32.9278	0.717237	38.4254						0.106383	72.9264							0.10759	100.43			0.151416	95.925							0.245558	31.2354	0.540139	27.3218	0.247962
0.653785	33.2618	0.547919	28.764	0.629063	32.5149	0.288739	48.4947	0.2837	33.3282	0.258494	45.2141	0.950657	35.1493	0.373503	44.24	0.30951	33.3597	0.481775	38.8784						0.100265	76.6897							0.136804	101.278			0.136723	98.5778							0.193127	31.2874	0.430245	27.492	0.279424
0.574245	33.3461	0.58052	29.0621	0.769631	32.7206	0.141625	48.5176	0.660124	33.8416	0.214392	45.3214	0.185477	35.5984	0.51816	45.1868	0.402109	33.5076	0.612089	38.974						0.100368	78.4641							0.108671	106.694			0.111473	107.019							0.226724	31.3342	0.109366	27.5225	0.292039
0.661312	33.6477	0.516374	29.1619	0.520746	32.9347	0.324366	49.3251	0.27745	34.0038	0.290896	45.4234	0.41245	36.1187	0.620857	45.3338	0.447864	33.7964	0.418418	38.9945						0.10002	85.8867							0.122842	106.802			0.139073	109.913							0.124705	32.1215	0.293735	27.5624	0.151642
0.897507	33.8391	0.528764	29.1979	0.651372	33.2618	0.29196	49.3252	0.558955	34.204	0.284231	45.59	0.277756	36.7534	0.480273	45.7228	0.359945	34.0256	0.48727	39.048						0.116607	86.9328											0.116828	115.417							0.379285	32.9651	0.305385	27.7376	0.252531
0.494847	33.9208	0.377081	29.2164	0.568532	33.3461	0.140519	49.7025	0.337689	34.2839	0.209544	45.6294	0.617763	36.7568	0.280281	45.8929	0.246626	34.5069	0.374181	39.5659						0.106774	88.2404											0.134329	121.936							0.149186	33.0379	0.311874	28.0344	0.272173
0.682084	34.2111	0.596443	29.2377	0.658461	33.6477	0.265304	50.6092	0.120018	34.9207	0.16587	46.1886	0.275551	37.2569	0.358792	46.2425	0.163657	34.5589	0.446719	40.6105						0.122138	92.4228											0.111787	123.274							0.218016	33.0427	0.154303	28.1587	0.261293
0.500089	34.2463	0.820351	29.3271	0.894633	33.8391	0.349319	50.9237	0.301917	35.4544	0.401733	47.038	0.957901	37.274	0.28411	46.7082	0.596413	34.8587	0.619674	40.7038						0.104214	93.055											0.16044	123.444							0.3205	33.0636	0.461146	28.778	0.320866
0.844349	34.8985	1.08253	29.3324	0.493154	33.9208	0.30195	51.3265	0.278038	35.9906	0.297101	47.0688	0.995433	37.8935	0.377762	47.1796	0.575838	34.9535	0.375319	41.038						0.100103	93.9667																			0.327503	33.4165	0.222417	28.9876	0.29737
0.526712	34.9031	0.610095	31.4711	0.680833	34.2111	0.251709	51.7782	0.147711	36.8626	0.157742	47.176	0.971452	37.9067	0.479043	47.6086	0.22761	35.2241	0.442204	41.2837						0.102765	112.976																			0.190757	33.6169	0.439766	29.0363	0.22021
0.614896	34.9167	0.419016	31.6137	0.499036	34.2463	0.129476	52.1852	0.387777	36.9946	0.257569	47.4422	0.574177	38.2097	0.140424	48.945	0.557295	35.3481	0.727531	41.2982																										0.105812	33.6656	0.287302	29.0617	0.213986
0.542506	35.3066	0.283273	31.6138	0.842452	34.8985	0.25925	52.2324	0.309915	37.166	0.371811	47.8591	0.388384	38.5232	0.361672	48.963	0.36595	35.6938	0.555458	42.3686																										0.276308	33.8871	0.332512	29.0831	0.17442
0.504908	35.3161	0.829068	31.6413	0.524019	34.9031	0.208033	52.4607	0.311634	37.7033	0.308216	48.6556	0.540472	38.5309	0.463623	49.2497	0.206787	35.8594	0.515175	42.8795																										0.348514	34.2172	0.434623	29.4634	0.265533
0.553296	35.3832	0.489824	31.7851	0.613507	34.9167	0.23549	54.5494	0.45628	38.0122	0.28064	50.3639	0.176865	38.5625	0.250959	50.2216	0.555025	36.4236	0.599365	43.3468																										0.361109	34.6435	0.319398	29.6095	0.298912
0.60759	35.4492	0.364641	31.9432	0.538552	35.3066	0.186494	55.2784	0.194495	38.5982	0.30256	51.0199	0.523844	38.5731	0.187422	50.6124	0.633644	36.5504	0.388754	43.6157																										0.323993	34.6486	0.31659	29.6477	0.223979
0.342006	35.6385	0.603327	32.1402	0.499453	35.3161	0.247691	55.6405	0.289566	38.6467	0.233694	52.0678	0.312439	38.6819	0.464938	51.2944	0.416835	36.9967	0.427175	44.0286																										0.335762	34.7894	0.417288	29.9951	0.270434
0.435213	35.6622	0.359425	32.4085	0.551846	35.3832	0.219168	55.7793	0.221357	38.9295	0.231558	52.166	0.602089	39.3728	0.198027	51.7552	0.253445	37.0256	0.372186	44.4085																										0.312622	34.9775	0.272234	30.0478	0.344241
0.560388	35.854	0.661189	32.4499	0.602931	35.4492	0.108691	56.6287	0.272729	39.4262	0.314797	52.3257	0.812041	39.5515	0.408967	51.8937	0.247287	37.2298	0.6226	44.4906																										0.349749	35.7513	0.323324	30.0919	0.120294
0.404441	36.1748	0.10107	32.7062	0.33943	35.6385	0.20766	56.9283	0.253453	39.4283	0.155129	52.6931	0.706165	39.6204	0.303085	52.3877	0.529972	37.7679	0.567079	44.4999																										0.417545	35.8722	0.312838	30.4163	0.27746
0.527592	36.379	0.375909	32.9417	0.433703	35.6622	0.241319	57.7121	0.227485	39.6156	0.244015	53.1379	0.339802	39.6936	0.230256	52.8972	0.455189	37.9532	1.02362	44.5376																										0.240487	35.8784	0.421273	30.4185	0.16063
0.378512	36.5736	0.316784	33.3446	0.553194	35.854	0.222152	58.567	0.206607	39.7021	0.226318	53.2695	0.424577	39.8314	0.653773	53.2293	0.639876	38.0041	0.765133	44.6627																										0.295394	35.9118	0.42829	30.7889	0.26121
0.499536	36.7173	0.418994	33.3625	0.402794	36.1748	0.213008	58.6069	0.144378	40.1324	0.184974	53.6527	0.469814	40.0666	0.166336	53.4442	0.158908	38.7729	0.847588	45.4282																										0.31369	36.4151	0.329745	31.5305	0.262739
0.671543	37.3231	0.403507	33.532	0.526244	36.379	0.183047	58.6501	0.151215	40.3563	0.329834	53.9498	0.493051	40.188	0.484904	53.4828	0.924664	38.827	0.513143	45.5458																										0.435559	36.4405	0.325767	31.5699	0.286688
0.44051	37.4218	0.652594	33.6438	0.376746	36.5736	0.278773	58.9456	0.147929	40.5512	0.189773	54.6063	0.741832	40.4358	0.412776	53.8452	0.432928	39.088	0.610156	45.7683																										0.135079	37.0471	0.287047	31.6364	0.24575
0.520303	37.5832	0.454263	33.6689	0.492151	36.7173	0.306904	59.0252	0.254445	40.6757	0.1568	54.6471	0.218685	41.1594	0.253137	54.3632	0.509878	39.3453	0.419179	45.8531																										0.286713	37.3176	0.381972	31.8583	0.236044
0.263905	37.7484	0.445613	33.956	0.670256	37.3231	0.196009	59.1843	0.579038	41.1387	0.132158	55.3991	0.317205	41.4259	0.492103	54.5429	0.184859	39.5009	0.204582	45.9215																										0.326244	37.426	0.21944	32.1849	0.246624
0.665371	38.1298	1.03002	34.0932	0.434475	37.4218	0.185621	59.1849	0.177639	41.1899	0.132287	55.8021	0.181625	41.6677	0.32811	54.725	0.457672	39.833	0.670831	46.826																										0.272904	37.4394	0.345747	32.1906	0.346648
0.464502	38.2518	0.685921	34.6874	0.517698	37.5832	0.223549	59.7984	0.327871	41.346	0.218646	56.5732	0.463642	42.2753	0.469685	55.5547	0.834033	40.2315	0.568124	46.8785																										0.223146	37.527	0.30958	32.2908	0.150186
0.540778	38.3246	0.49699	34.8114	0.254882	37.7484	0.22749	59.85	0.334056	41.7823	0.214007	57.5735	0.68419	42.383	0.451457	56.4383	0.458506	40.4908	0.511511	46.8913																										0.343093	37.9934	0.313901	32.4037	0.265174
0.73739	39.2046	0.430379	34.9252	0.664125	38.1298	0.101713	59.9053	0.127744	42.1535	0.136537	58.5535	0.376278	43.0526	0.244875	56.479	0.394664	40.9536	0.508425	47.128																										0.213133	38.3597	0.298115	32.4368	0.287069
0.418787	39.256	0.419775	34.9499	0.462893	38.2518	0.149185	60.2272	0.283654	42.1841	0.316149	59.5313	0.393389	43.0823	0.453364	56.5881	1.1072	41.5747	0.25438	47.4051																										0.412194	38.4339	0.504231	32.5189	0.291248
0.291726	39.4884	0.370493	35.0532	0.535372	38.3246	0.197876	60.989	0.212768	42.5457	0.126073	59.7398	0.472415	43.2167	0.317862	56.5885	0.389349	41.7743	0.401677	47.8377																										0.37676	38.4672	0.345135	32.6088	0.529779
0.870908	39.6239	0.493637	35.1543	0.73518	39.2046	0.198094	61.5917	0.162975	42.7967	0.130473	60.0124	0.396549	43.5947	0.563992	57.5649	0.172032	41.777	0.127187	48.1849																										0.203046	38.5792	0.402281	32.8289	0.135582
0.667972	39.7399	0.880024	35.1869	0.417526	39.256	0.152836	61.7125	0.266174	43.1164	0.14764	60.4578	0.470303	43.9779	0.329411	58.3222	0.360336	41.7972	0.422364	48.2565																										0.271148	38.8221	0.346662	32.9381	0.286054
0.506342	39.9528	0.580434	35.3043	0.284248	39.4884	0.168269	64.1623	0.297565	43.1315	0.184995	60.5224	0.315077	44.1951	0.522714	58.8413	0.371415	41.9554	0.487294	48.727																										0.284639	38.9808	0.345154	33.01	0.244781
0.486013	40.0102	0.688522	35.3171	0.866789	39.6239	0.152484	64.2313	0.27354	43.6561	0.12984	61.7162	0.553757	45.1314	0.230992	59.0406	0.366465	42.3217	0.384467	48.7629																										0.346438	39.46	0.359024	33.2342	0.271967
0.57032	40.0638	0.734476	35.4436	0.665231	39.7399	0.210387	64.5875	0.273486	43.7817	0.111294	63.3122	0.70259	45.1718	0.316679	59.0575	0.208947	42.3692	0.36283	49.7463																										0.217301	39.6661	0.490846	33.9572	0.234451
0.392871	40.075	0.555061	35.5467	0.505341	39.9528	0.121232	64.6518	0.329407	44.1565	0.205995	64.8131	0.448452	45.2744	0.378395	59.4372	0.562299	42.6794	0.669314	49.7784																										0.307532	40.04	0.590208	34.179	0.216005
0.35467	40.3	0.8854	35.6797	0.48433	40.0102	0.186597	65.6081	0.240061	44.4041	0.196606	65.3104	0.40929	45.3127	0.271733	59.4589	0.220388	42.8827	0.514875	49.8587																										0.22216	40.216	0.371783	34.1905	0.166768
0.274683	40.3493	0.686475	35.8497	0.567954	40.0638	0.149733	65.8723	0.105251	44.9579	0.274111	65.7019	1.18122	45.6206	0.475453	59.627	0.477655	43.1296	0.29063	50.2112																										0.273497	41.2809	0.14714	34.7054	0.281324
0.649555	40.369	0.337855	36.0242	0.391916	40.075	0.205557	66.1483	0.174956	45.2795	0.142137	66.3594	0.626805	45.9917	0.389071	59.8251	0.421008	43.4121	0.49252	50.3778																										0.259891	41.5119	0.528405	34.8209	0.202526
0.476338	40.6922	0.151808	36.058	0.35005	40.3	0.169052	67.8941	0.210474	45.4333	0.338676	67.1103	0.525091	46.1381	0.346839	60.1999	0.356572	43.881	0.423365	52.2525																										0.214562	41.955	0.382575	35.5039	0.194852
0.340265	40.9946	0.48517	36.1677	0.269111	40.3493	0.197668	69.0402	0.451129	45.4377	0.156128	69.4521	0.832015	46.2757	0.221848	61.7448	0.157032	44.0933	0.234803	52.9867																										0.239495	41.9753	0.47526	35.5382	0.211356
0.627663	41.0312	0.95594	36.4129	0.647581	40.369	0.147853	69.6185	0.318237	45.6354	0.250246	69.7252	0.260664	46.4306	0.44709	63.0123	0.225916	44.2459	0.288647	53.2103																										0.158476	42.6133	0.313631	35.6125	0.305083
0.491623	41.1754	0.695538	36.4634	0.472278	40.6922	0.302929	70.5542	0.319628	45.9293	0.183361	69.8318	0.405584	47.1362	0.354593	63.3029	0.102293	45.5581	0.141016	53.5874																										0.388984	42.8966	0.224814	35.7077	0.210556
0.157637	41.3243	0.295096	36.629	0.33931	40.9946	0.176214	70.5731	0.285128	46.0164	0.287691	70.7391	0.512367	47.2663	0.264417	63.689	0.335117	46.1522	0.10824	53.6273																										0.360892	42.9074	0.343142	35.7077	0.111548
0.5074	41.7444	0.407488	37.286	0.626792	41.0312	0.173631	70.6407	0.142357	46.0633	0.241354	71.5647	0.456238	47.4111	0.255797	63.7095	0.481162	46.4936	0.179929	53.8973																										0.240078	42.9275	0.283983	35.8092	0.298441
0.553249	42.3475	0.420702	37.5671	0.153243	41.3243	0.141849	71.2245	0.500014	46.2091	0.2112	71.9065	0.179197	47.5341	0.313924	63.8124	0.123389	46.8702	0.485614	53.9519																										0.140286	43.1089	0.446584	35.9582	0.241928
0.405271	42.4396	0.382777	37.7118	0.504803	41.7444	0.176923	72.8934	0.208444	46.2312	0.20006	72.6885	0.36314	47.7423	0.148193	64.1488	0.426366	46.9076	0.371846	54.3335																										0.22302	43.5784	0.363108	36.0039	0.186416
0.391695	43.3911	0.399697	37.7593	0.549595	42.3475	0.203446	73.4006	0.296272	46.4038	0.153332	74.4641	0.152854	47.79	0.181753	64.8395	0.506636	47.3136	0.409949	54.6153																										0.271757	43.6836	0.424193	36.0984	0.249904
0.550121	43.8187	0.438431	38.025	0.404376	42.4396	0.16819	73.4603	0.231644	46.9622	0.173105	74.7801	0.542402	48.0911	0.193212	65.4639	0.315238	47.516	0.440613	55.4089																										0.113348	43.9811	0.331946	36.1165	0.119553
0.534037	44.279	0.525039	38.0324	0.386106	43.3911	0.138794	74.0112	0.173399	47.3972	0.180976	74.9213	0.34094	49.7569	0.101818	65.9389	0.197592	47.9289	0.22748	55.8667																										0.271646	44.129	0.364552	36.5412	0.206524
0.603495	44.2868	0.270973	38.153	0.547126	43.8187	0.128064	74.6697	0.18504	47.6652	0.111536	74.9969	0.626116	50.2923	0.39639	66.0947	0.347705	48.5626	0.36752	56.2552																										0.219987	44.307	0.455019	36.8517	0.229464
0.361535	44.5383	0.498582	38.1704	0.531516	44.279	0.15673	74.7278	0.239788	48.419	0.187833	75.7373	0.536949	50.85	0.366056	66.7399	0.461247	48.7331	0.401134	56.918																										0.208617	44.7737	0.421198	36.9711	0.194963
0.556132	44.962	0.39638	38.2158	0.599311	44.2868	0.105849	75.2184	0.307993	49.1221	0.107378	76.4123	0.606915	51.1223	0.199926	68.7117	0.2728	50.1272	0.230293	56.9505																										0.146946	44.8934	0.248274	37.0671	0.15771
0.399015	45.3032	0.466215	38.4994	0.360558	44.5383	0.175361	75.3296	0.238147	49.4943	0.19874	77.0662	0.450059	51.4705	0.284201	68.7357	0.200802	50.2453	0.353784	57.2622																										0.200047	45.0794	0.417176	37.1172	0.109948
0.325522	46.0637	0.509652	38.7648	0.554756	44.962	0.152533	76.1163	0.260826	50.2326	0.10369	77.2068	0.513911	51.9458	0.108669	68.888	0.614667	51.0167	0.612058	57.4177																										0.291687	45.491	0.280615	37.1583	0.260408
0.446943	46.1136	0.285306	39.4127	0.398191	45.3032	0.170238	76.687	0.10175	51.1843	0.13907	79.1135	0.579756	52.5663	0.299235	69.2177	0.492085	52.1359	0.164806	57.5386																										0.181469	45.6268	0.222904	37.6321	0.226733
0.504608	46.1723	0.46636	39.7078	0.322805	46.0637	0.199698	76.7496	0.441703	51.4045	0.126066	79.9903	0.328792	53.0099	0.244258	70.1173	0.417692	52.9051	0.427644	58.1661																										0.222154	46.0966	0.33512	37.6925	0.285442
0.42075	46.541	0.406752	39.9131	0.443933	46.1136	0.158191	77.93	0.230889	51.577	0.119797	80.9718	0.303874	53.3229	0.433581	70.612	0.299411	53.0586	0.150757	58.2124																										0.261759	46.2535	0.362536	37.7405	0.118269
0.450591	46.6769	0.413723	39.9192	0.502653	46.1723	0.181672	79.9695	0.132218	52.165	0.112904	81.0253	0.100427	54.0686	0.254116	71.2321	0.488486	53.3681	0.406229	58.4701																										0.308781	46.3195	0.531251	37.9651	0.224598
0.309621	46.7508	0.617804	40.3224	0.419361	46.541	0.22158	80.8012	0.1088	53.3221	0.113885	81.2152	0.617794	54.2523	0.256392	71.9054	0.341864	54.3073	0.470279	58.6186																										0.352075	46.9723	0.272829	38.4453	0.145789
0.367119	46.8604	0.394023	40.6477	0.448675	46.6769	0.12512	83.2402	0.126336	54.3115	0.10818	81.321	0.438875	54.4156	0.326181	72.3058	0.189089	54.4597	0.484141	58.7221																										0.202446	47.1104	0.169063	38.6224	0.207305
0.532758	47.0266	0.376567	40.9645	0.304911	46.7508	0.132764	84.7922	0.143631	54.4745	0.125892	81.4619	0.380402	54.9365	0.404936	73.1441	0.195069	54.6047	0.223895	59.4254																										0.174327	47.636	0.169438	38.7705	0.23042
0.740501	47.2299	0.36766	41.1909	0.365386	46.8604	0.129012	85.7524	0.302895	55.9372	0.149198	83.8796	0.427889	55.527	0.166415	73.5965	0.252811	54.8266	0.368621	59.8618																										0.164009	48.0899	0.259682	38.9436	0.207356
0.4442	47.318	0.406942	41.2244	0.531675	47.0266	0.124308	86.4457	0.190155	56.2548	0.182292	84.0429	0.619214	55.7212	0.246301	74.8905	0.170421	56.1112	0.155187	60.1136																										0.194723	48.7003	0.337121	38.9774	0.228604
0.457817	47.4631	0.272752	41.5478	0.739237	47.2299	0.183471	86.7656	0.100614	56.2632	0.12781	84.2173	0.359053	55.7798	0.165968	75.9955	0.188367	56.2182	0.37573	60.2819																										0.244385	48.8941	0.315961	39.0305	0.379085
0.348404	47.6924	0.424535	41.7136	0.440843	47.318	0.149933	86.8557	0.175764	56.9887	0.209492	85.0098	0.263612	56.1486	0.124634	77.0686	0.422662	56.5234	0.366694	60.4693																										0.193355	49.189	0.439048	39.1876	0.19331
0.531659	48.0475	0.33176	41.7635	0.456842	47.4631	0.141382	88.8989	0.210738	57.5551	0.133437	85.3336	0.33346	56.1803	0.161236	77.2019	0.104524	56.9063	0.372752	60.6032																										0.322822	49.3055	0.323605	39.2027	0.241399
0.5218	48.0517	0.196439	41.8808	0.343745	47.6924	0.133467	93.0246	0.200105	58.0877	0.145333	86.383	0.287497	56.2161	0.138804	77.5988	0.135517	57.0897	0.287584	61.1504																										0.207457	49.9162	0.377692	39.298	0.261758
0.476866	48.5826	0.263031	41.9456	0.527895	48.0475	0.116596	94.9844	0.280129	58.3526	0.139164	86.5078	0.191376	56.854	0.297916	78.7908	0.340927	57.7683	0.306999	62.6518																										0.24192	49.9832	0.195626	39.4358	0.186743
0.338825	48.8552	0.277932	41.9588	0.520666	48.0517	0.127446	97.766	0.328685	58.5908	0.146646	86.6715	0.254554	57.0499	0.206759	79.4882	0.119204	57.7877	0.267937	62.682																										0.226861	49.9862	0.232684	39.5619	0.196957
0.432987	49.0952	0.31827	42.08	0.34074	48.3342	0.109892	104.109	0.18408	58.9906	0.122174	88.9036	0.464089	57.3911	0.254619	80.2816	0.304333	58.7093	0.293688	63.1461																										0.330293	50.0402	0.240842	39.6321	0.242784
0.480344	49.1611	0.378882	42.2508	0.47567	48.5826	0.128427	110.525	0.166848	59.5474	0.116971	92.2007	0.413336	57.6433	0.115033	80.4187	0.371163	58.8353	0.480313	63.1976																										0.27526	50.1773	0.230419	39.6978	0.153376
0.393306	49.2341	0.200423	42.4662	0.337591	48.8552	0.100931	110.745	0.140758	59.8732	0.178113	95.2263	0.478617	57.6544	0.19929	80.8894	0.18408	59.3502	0.369385	63.786																										0.201584	50.4853	0.274047	39.9195	0.142807
0.447623	49.4643	0.321883	42.5318	0.431424	49.0952	0.125305	111.273	0.109731	60.0408	0.118079	98.2639	0.428549	58.5287	0.294008	81.3179	0.403983	59.8901	0.378906	64.1751																										0.214965	50.5878	0.265896	40.1674	0.151808
0.366627	49.6863	0.200372	42.6541	0.476711	49.1611	0.116463	111.686	0.108092	60.5865	0.149776	98.4902	0.215838	58.9374	0.187777	81.9181	0.301601	59.9167	0.305958	64.7603																										0.244501	50.8301	0.310563	40.2009	0.230624
0.644732	50.0851	0.574912	42.6568	0.390743	49.2341	0.117534	113.73	0.231229	61.2423	0.139615	99.6449	0.441528	59.3883	0.164175	82.5504	0.338485	60.1775	0.204906	66.2148																										0.316819	50.9381	0.332487	40.6372	0.276984
0.40023	50.2865	0.360127	42.7058	0.446584	49.4643	0.102465	123.15	0.174188	61.3857	0.103485	100.343	0.171245	60.1418	0.156958	86.0753	0.230402	61.0208	0.329494	66.4202																										0.243172	51.3177	0.29242	40.9155	0.196768
0.316744	50.9844	0.427211	42.8909	0.365318	49.6863			0.173601	62.0359	0.104905	104.545	0.273767	60.521	0.139137	87.7499	0.458299	61.2193	0.291115	66.5216																										0.164706	51.8873	0.251218	41.1302	0.131955
0.478777	51.0964	0.579416	43.6417	0.64279	50.0851			0.233651	62.036	0.102688	106.306	0.820029	61.1229	0.156875	89.2063	0.386386	62.6385	0.317556	67.567																										0.295568	52.0015	0.283815	41.9008	0.187742
0.384758	51.5213	0.393366	43.6594	0.399346	50.2865			0.152587	62.2645	0.123119	111.128	0.502511	61.3494	0.175089	90.9573	0.236718	63.105	0.230126	68.1223																										0.116172	52.8613	0.259256	42.2459	0.197379
0.349078	51.7647	0.30891	45.048	0.314021	50.9844			0.223387	62.3388	0.112617	118.766	0.642806	62.2837	0.157264	92.1916	0.411894	63.1741	0.157395	69.3271																										0.196045	53.3267	0.224324	42.264	0.218753
0.465234	52.1364	0.625907	45.1555	0.477751	51.0964			0.19151	63.0516			0.325234	62.7481	0.204535	94.6848	0.142094	63.5664	0.362104	69.5681																										0.302719	53.3971	0.380677	42.8153	0.222206
0.236438	52.49	0.582298	45.4809	0.381677	51.5213			0.128769	63.3103			0.430287	62.8267	0.152187	94.9653	0.403033	64.2561	0.163442	69.6224																										0.179944	53.5472	0.220283	42.8226	0.162726
0.398415	52.6499	0.368846	46.0035	0.347067	51.7647			0.331477	63.4241			0.746512	62.9353	0.126594	97.0984	0.262577	65.338	0.503147	70.0836																										0.15887	53.6706	0.256931	42.918	0.275754
0.524071	52.8086	0.447518	46.0667	0.232532	52.49			0.128479	63.4241			0.415397	63.003	0.144693	98.708	0.18222	65.6023	0.204599	70.7443																										0.183457	53.8713	0.364985	43.3437	0.123017
0.424616	53.0266	0.643755	46.1231	0.396301	52.6499			0.226845	63.763			0.458765	63.7868	0.16009	103.144	0.14111	67.1608	0.495971	71.2245																										0.22029	54.623	0.212664	43.5068	0.213608
0.358442	53.0712	0.288569	46.124	0.521671	52.8086			0.161263	64.2452			0.253953	63.9279	0.122462	103.576	0.198865	68.5489	0.211935	72.6817																										0.30429	54.9575	0.284884	43.5957	0.17596
0.460052	53.4753	0.678447	46.2218	0.423532	53.0266			0.111378	65.4069			0.211871	64.1492	0.152119	105.392	0.139029	68.7893	0.133487	73.9002																										0.26835	55.0807	0.463481	43.6151	0.125267
0.375558	53.5613	0.331866	46.364	0.356637	53.0712			0.157459	65.5567			0.499651	64.6808	0.131459	105.943	0.145007	68.9362	0.353477	74.0703																										0.130192	55.1546	0.308749	43.6507	0.158587
0.346949	54.2847	0.915488	46.373	0.456015	53.4753			0.112403	66.4663			0.607096	64.8552	0.14748	107.906	0.356841	69.748	0.363418	74.1443																										0.128589	55.7743	0.356932	43.6674	0.17113
0.318965	54.2952	0.28645	46.4782	0.373828	53.5613			0.134939	66.6742			0.338478	65.3992	0.158654	108.041	0.230831	69.8506	0.168595	74.5681																										0.39765	55.991	0.24851	44.0746	0.207592
0.441883	54.5913	0.435919	46.4867	0.34381	54.2847			0.250912	66.7836			0.106308	66.1018	0.131447	111.178	0.151285	70.4049	0.160769	75.525																										0.168608	56.0251	0.226661	44.1537	0.223601
0.544624	54.7096	0.499048	46.6555	0.314811	54.2952			0.168723	67.6935			0.44991	66.6999	0.143091	117.278	0.16624	70.6427	0.198656	76.96																										0.119246	56.044	0.428042	44.2152	0.199434
0.106505	54.8435	0.444956	47.1709	0.439432	54.5913			0.200751	69.439			0.351029	67.1982	0.110272	128.584	0.365449	71.0992	0.443052	77.6725																										0.137521	56.0716	0.479832	44.2888	0.127772
0.313456	54.9448	0.560591	47.6248	0.540304	54.7096			0.185908	70.1498			0.560809	67.5564			0.24759	71.4293	0.186652	78.0329																										0.137493	56.1139	0.199185	44.8179	0.186099
0.416807	54.977	0.151226	47.6399	0.312199	54.9448			0.11843	70.3088			0.485176	69.6404			0.197707	72.9775	0.270537	79.0359																										0.247616	56.1159	0.171693	44.8252	0.17858
0.162634	54.9967	0.222116	47.706	0.415516	54.977			0.169884	70.5871			0.283196	70.2982			0.420181	73.1623	0.122954	80.0667																										0.169971	56.1865	0.286293	44.8542	0.160403
0.333058	55.7021	0.436359	47.773	0.160328	54.9967			0.17149	70.7691			0.376728	70.4205			0.286094	75.0702	0.186787	80.3823																										0.290947	56.4935	0.235252	45.1591	0.176935
0.319787	55.7961	0.41634	47.8366	0.328755	55.7021			0.11462	71.6907			0.267569	70.6653			0.173557	75.2697	0.127529	80.55																										0.165176	56.5695	0.28356	45.355	0.14985
0.282351	56.4514	0.368893	48.0396	0.317378	55.7961			0.270013	72.0044			0.258682	71.0131			0.608703	75.3241	0.283306	81.9712																										0.207638	56.6165	0.372197	45.6019	0.125551
0.442922	57.1724	0.345332	48.2506	0.278881	56.4514			0.174883	72.2178			0.353464	71.3472			0.211378	75.4274	0.269596	82.3167																										0.157883	56.7328	0.350051	45.9444	0.100434
0.277742	57.286	0.356477	48.2645	0.441416	57.1724			0.184109	73.2274			0.364105	71.7562			0.124513	75.6416	0.421681	82.4102																										0.290479	56.8119	0.283001	46.703	0.175683
0.418514	57.7852	0.457163	48.4754	0.276355	57.286			0.150079	73.911			0.314375	71.9264			0.183392	75.9385	0.199706	82.4379																										0.136448	57.4988	0.314286	46.8177	0.143287
0.407891	57.8943	0.108043	48.7365	0.417208	57.7852			0.167542	74.495			0.512828	74.8385			0.104527	76.5864	0.168631	83.0566																										0.284758	57.7242	0.308213	47.0525	0.118352
0.500915	58.2808	0.332584	48.8498	0.40652	57.8943			0.162042	74.9722			0.177651	75.4797			0.195135	77.008	0.253278	84.6539																										0.221622	58.7411	0.255256	47.1265	0.121409
0.245517	58.3351	0.469764	48.8607	0.498267	58.2808			0.108176	75.6752			0.136758	76.2839			0.137726	77.9233	0.188424	86.3424																										0.105544	59.0611	0.234727	47.5601	0.133288
0.265407	58.8188	0.393112	48.8765	0.244335	58.3351			0.143006	76.2962			0.230403	76.7018			0.270524	78.5281	0.201257	86.7416																										0.101899	59.0959	0.225883	48.0564	0.10854
0.292723	59.1221	0.15031	49.114	0.263306	58.8188			0.224135	77.274			0.439615	77.0642			0.311812	78.6425	0.402862	87.1048																										0.295053	59.3004	0.332722	48.1541	0.156839
0.354453	59.1937	0.310636	49.2748	0.291834	59.1221			0.289256	79.3598			0.441815	77.5925			0.139921	80.0858	0.158022	88.426																										0.187209	59.4626	0.120321	48.2396	0.108443
0.267861	59.6441	0.251559	49.3079	0.353345	59.1937			0.180826	81.48			0.208623	77.8568			0.213258	81.2895	0.250755	88.4945																										0.290727	60.5232	0.247919	48.2688
0.230235	59.854	0.504093	49.8919	0.266548	59.6441			0.10683	82.3293			0.238535	79.1258			0.254971	81.3366	0.352494	89.1891																										0.283306	61.7538	0.31112	48.378
0.270898	60.1769	0.342978	49.9828	0.227867	59.854			0.141204	84.1454			0.395764	79.7762			0.133266	82.1854	0.123998	89.5388																										0.117664	62.381	0.290892	48.5784
0.117187	60.2508	0.349793	49.9987	0.266242	60.1769			0.127667	85.1828			0.491134	80.7055			0.119128	82.753	0.116972	91.5044																										0.232167	62.8482	0.285347	48.6233
0.419595	60.2896	0.423737	50.1461	0.113692	60.2508			0.116918	86.5813			0.227315	81.0752			0.319192	84.7087	0.152426	91.9926																										0.183522	63.0333	0.229613	49.2224
0.318073	60.7236	0.302774	50.1609	0.418535	60.2896			0.162715	86.6431			0.293381	81.1662			0.167708	85.4393	0.186253	93.0537																										0.10866	63.8161	0.364191	49.6346
0.312187	60.8272	0.273118	50.1985	0.315815	60.7236			0.127957	86.9494			0.16771	81.6183			0.124157	85.5769	0.163855	93.6505																										0.141758	63.9173	0.332881	50.6365
0.313392	61.2544	0.306537	50.2584	0.310666	60.8272			0.146067	87.8796			0.379752	82.3387			0.150194	86.0107	0.120287	94.0059																										0.115718	64.1487	0.169453	50.7856
0.221299	61.258	0.454564	50.4361	0.310362	61.2544			0.167757	88.0049			0.130485	82.5899			0.103078	86.0168	0.344467	94.9225																										0.400258	64.1967	0.248147	51.2153
0.385862	61.2719	0.316011	50.4632	0.384671	61.2719			0.141882	89.4318			0.176574	82.8406			0.171254	88.0156	0.272525	95.1021																										0.126381	64.2598	0.248278	51.2941
0.267199	61.4379	0.397247	50.7115	0.265881	61.4379			0.163816	90.6548			0.131601	83.2749			0.19516	88.034	0.130797	96.7042																										0.163459	65.1746	0.261625	51.3966
0.335746	61.4823	0.501849	50.7207	0.334867	61.4823			0.135966	91.8172			0.365407	83.3916			0.160856	88.8766	0.200642	97.7076																										0.152318	65.5357	0.52222	51.5434
0.26613	61.6618	0.276428	50.819	0.264866	61.6618			0.101477	94.3969			0.328345	83.6052			0.153372	89.3409	0.216225	98.1751																										0.132604	65.6281	0.186069	51.798
0.326567	61.6932	0.439485	51.399	0.32441	61.6932			0.147978	94.7789			0.103738	83.7092			0.189575	90.0606	0.127675	100.793																										0.213458	67.0675	0.278538	51.8463
0.169539	61.7425	0.300409	51.5273	0.163846	61.7425			0.101058	96.8632			0.292938	85.373			0.178813	90.1127	0.142155	101.365																										0.240695	67.3103	0.179541	52.452
0.259032	62.3073	0.187467	51.71	0.256655	62.3073			0.126596	100.981			0.142386	85.4923			0.204717	90.3341	0.251251	102.145																										0.212379	67.4147	0.296687	52.828
0.191618	62.5453	0.335249	51.9258	0.189662	62.5453			0.100273	101.254			0.123464	88.8024			0.104947	91.3151	0.182963	102.794																										0.158757	67.6441	0.349143	52.911
0.295173	62.8127	0.544367	52.5891	0.293997	62.8127			0.108677	102.34			0.154967	89.4183			0.259075	95.4204	0.180055	102.915																										0.20866	68.1326	0.509895	53.2983
0.227261	63.2487	0.296979	52.8133	0.225417	63.2487			0.130224	103.543			0.271957	89.7136			0.161188	95.4601	0.122527	106.392																										0.164556	68.385	0.408141	53.4328
0.351583	63.2942	0.211497	53.899	0.348789	63.2942			0.102895	104.015			0.163109	90.1027			0.111562	96.1736	0.155764	108.948																										0.142438	69.852	0.25794	54.2904
0.38681	63.5405	0.289323	54.0411	0.384054	63.5405			0.183598	106.617			0.394082	91.1012			0.152643	96.2254	0.195893	109.466																										0.204125	69.9535	0.316873	54.7665
0.212494	63.8033	0.452431	54.1095	0.207997	63.8033			0.106359	112.453			0.247932	91.5344			0.134423	96.6037	0.153304	110.315																										0.229651	71.4396	0.261114	54.9879
0.213976	63.8272	0.307581	54.3562	0.212621	63.8272			0.100657	116.371			0.332812	93.4106			0.138659	97.4264	0.155955	112.198																										0.1426	71.4719	0.187213	55.0287
0.18798	63.9702	0.406259	54.4649	0.184278	63.9702			0.101746	117.32			0.14826	93.4231			0.197244	97.4276	0.141734	114.504																										0.161584	71.5606	0.265497	55.248
0.205974	64.0179	0.290092	54.8359	0.201953	64.0179			0.106932	127.303			0.147398	94.2116			0.136656	97.645	0.116949	116.749																										0.159802	71.6988	0.165436	55.301
0.361902	64.8698	0.334756	55.6699	0.358523	64.8698			0.106434	127.501			0.160114	95.2183			0.232471	97.9502	0.120829	116.872																										0.101151	71.9647	0.248709	55.3259
0.51753	65.8579	0.362175	55.9339	0.515711	65.8579							0.360806	95.6677			0.18763	98.1964	0.123056	116.953																										0.18443	72.1083	0.367479	55.4206
0.309315	66.3715	0.151626	56.0295	0.308025	66.3715							0.165756	96.0543			0.188972	98.9223	0.149511	121.341																										0.221854	73.5463	0.28136	55.5074
0.489481	66.7172	0.34274	56.1453	0.487983	66.7172							0.177546	96.1717			0.173747	99.2206	0.117024	124.145																										0.173243	73.6472	0.212357	55.7704
0.277621	67.1146	0.180917	56.2132	0.276736	67.1146							0.470471	98.583			0.138648	99.2851	0.153162	127.943																										0.160819	74.2724	0.248798	55.9235
0.275544	67.8687	0.323861	56.2492	0.274074	67.8687							0.265511	100.23			0.170723	99.8975	0.101948	130.485																										0.174515	74.754	0.291044	56.1512
0.193031	68.4313	0.385412	56.6433	0.190061	68.4313							0.209171	101.043			0.25656	102.274																												0.142193	75.0935	0.198691	56.2302
0.38841	68.7476	0.171404	57.0816	0.387198	68.7476							0.248231	102.065			0.124367	102.364																												0.11882	75.3381	0.317368	56.2763
0.256723	68.9002	0.30471	57.0934	0.252698	68.9002							0.158329	102.924			0.219759	102.656																												0.19273	75.7341	0.235918	56.2959
0.301707	68.9011	0.132796	57.2188	0.29982	68.9011							0.302435	102.962			0.194232	103.77																												0.196822	76.7623	0.174174	56.506
0.15128	69.3789	0.233309	57.7574	0.14873	69.3789							0.160853	104.008			0.15472	106.682																												0.148164	77.2654	0.209109	56.8408
0.466475	69.8149	0.150248	57.8816	0.464013	69.8149							0.310793	105.532			0.163735	108.478																												0.136789	77.6872	0.364231	57.1269
0.321734	69.8239	0.167018	58.4634	0.319039	69.8239							0.256959	110.316			0.116227	108.502																												0.130495	78.8138	0.244342	57.1574
0.220131	70.0555	0.366525	59.2852	0.217196	70.0555							0.267716	110.736			0.154923	110.13																												0.150466	79.2154	0.20177	57.1667
0.402744	70.293	0.284703	59.9329	0.267128	70.4102							0.196826	111.194			0.1629	111.017																												0.139771	80.3484	0.390676	57.3726
0.267984	70.4102	0.326369	60	0.239023	71.2084							0.151831	111.661			0.149356	111.153																												0.165061	80.5683	0.17234	57.4726
0.240373	71.2084	0.205901	60.0822	0.260285	71.3885							0.166787	112.56			0.101646	111.441																												0.105955	81.8367	0.273968	58.2534
0.261432	71.3885	0.41113	60.2237	0.221344	71.6552							0.371485	114.141			0.139598	114.182																												0.192322	82.3135	0.295594	58.3388
0.222897	71.6552	0.311001	60.2342	0.267499	71.7881							0.137664	120.412			0.132252	115.123																												0.134821	82.8349	0.252815	58.5825
0.26958	71.7881	0.233724	60.2627	0.297518	71.8028							0.180547	120.598			0.116815	116.656																												0.108778	84.2506	0.257001	58.5825
0.298641	71.8028	0.222439	60.3864	0.13355	72.0262							0.10596	121.532			0.177669	117.11																												0.119707	84.2665	0.12564	58.6217
0.137747	72.0262	0.276322	60.4724	0.216491	72.3265											0.129211	118.479																												0.14855	85.6117	0.282712	58.94
0.217486	72.3265	0.349247	60.4952	0.161702	72.814											0.128333	119.639																												0.103707	85.7382	0.291514	59.5432
0.164281	72.814	0.228362	60.6837	0.390763	72.9602											0.104323	121.486																												0.176804	85.8184	0.306785	59.5583
0.392661	72.9602	0.269413	60.7656	0.178363	73.991											0.16805	122.817																												0.148126	86.4942	0.150039	59.6246
0.180306	73.991	0.196969	60.8679	0.259509	74.2992											0.101464	124.03																												0.142594	87.3175	0.23409	59.8528
0.260961	74.2992	0.272112	61.0838	0.141957	74.7143											0.152645	125.079																												0.230553	88.1652	0.20437	60.5022
0.144567	74.7143	0.224683	61.1173	0.147113	74.733											0.219062	125.638																												0.122089	88.2152	0.176972	60.514
0.148853	74.733	0.175279	61.4513	0.18332	74.9175											0.128491	128.495																												0.160135	89.6948	0.252219	60.8211
0.185277	74.9175	0.259464	61.4577	0.178354	75.0377											0.11935	130.991																												0.152257	90.9261	0.207201	61.3097
0.180627	75.0377	0.247745	62.1953	0.255173	75.9003											0.200062	132.307																												0.13151	91.9944	0.239507	61.4551
0.102648	75.6362	0.217732	62.3028	0.279833	76.4932											0.105096	134.107																												0.167634	92.1605	0.175	61.6814
0.256266	75.9003	0.134933	62.5137	0.148916	76.7303																																								0.129739	94.2464	0.23554	62.0404
0.280742	76.4932	0.256876	62.7967	0.158621	76.8998																																								0.125531	94.4663	0.228326	62.0708
0.153119	76.7303	0.299087	62.8928	0.232415	77.5841																																								0.137748	95.2953	0.199589	62.5668
0.162435	76.8998	0.108506	63.3705	0.338185	77.6196																																								0.114506	95.8138	0.121613	62.7418
0.233752	77.5841	0.199485	63.3708	0.318864	77.7355																																								0.110826	101.224	0.281857	62.919
0.341381	77.6196	0.357737	64.5702	0.131958	77.8172																																								0.164209	102.131	0.209545	63.1724
0.319752	77.7355	0.111257	65.1038	0.301503	77.8401																																								0.104335	103.876	0.239547	63.4975
0.133975	77.8172	0.295153	65.3126	0.278694	79.0225																																								0.129091	106.01	0.120233	63.9044
0.302813	77.8401	0.270247	65.402	0.264299	79.0799																																								0.105242	110.672	0.201182	63.9505
0.279989	79.0225	0.269521	65.516	0.184227	79.8339																																								0.101376	113.634	0.16971	64.0633
0.267427	79.0799	0.15395	65.7506	0.204519	79.991																																								0.102639	118.86	0.292761	64.5022
0.185806	79.8339	0.207152	65.8385	0.251694	80.0013																																								0.105106	119.07	0.229276	65.2086
0.206453	79.991	0.21912	66.1237	0.241106	80.029																																										0.194445	65.5553
0.252733	80.0013	0.114181	66.791	0.211862	80.8769																																										0.143869	65.5731
0.243469	80.029	0.211345	67.0888	0.192484	81.199																																										0.114494	65.6237
0.21287	80.8769	0.207193	68.0563	0.212727	81.2231																																										0.212085	65.8264
0.193747	81.199	0.230719	68.0899	0.194857	81.2626																																										0.260222	65.8919
0.21372	81.2231	0.218056	68.2397	0.334457	82.5039																																										0.195998	66.1241
0.335553	82.5039	0.248411	69.3519	0.256762	83.0753																																										0.222868	66.1524
0.258567	83.0753	0.15423	69.4787	0.256412	83.3097																																										0.193116	67.2683
0.258931	83.3097	0.187426	69.6525	0.196259	83.3702																																										0.259622	67.3006
0.197511	83.3702	0.277616	70.277	0.314366	84.2008																																										0.282636	67.4689
0.316895	84.2008	0.15198	70.8283	0.287756	84.2416																																										0.197335	67.7827
0.289344	84.2416	0.318288	70.8957	0.238134	85.3044																																										0.164319	68.4301
0.242199	85.3044	0.124659	70.9931	0.21187	87.1495																																										0.172347	68.7147
0.214143	87.1495	0.143868	71.0027	0.173916	87.4828																																										0.104458	68.9047
0.175943	87.4828	0.207325	72.2263	0.153015	87.5775																																										0.147095	68.9588
0.154391	87.5775	0.15072	72.7681	0.268243	89.3677																																										0.311459	69.3168
0.100652	88.3616	0.17525	73.0113	0.110615	90.3347																																										0.222677	69.6457
0.269487	89.3677	0.185136	73.5016	0.152925	91.48																																										0.174451	69.6822
0.113203	90.3347	0.205247	74.1127	0.273412	91.6998																																										0.183665	70.7522
0.154408	91.48	0.245662	74.3327	0.255016	92.4033																																										0.208685	70.8512
0.274327	91.6998	0.210435	74.4016	0.202113	92.5739																																										0.156936	70.9243
0.256001	92.4033	0.210579	74.6029	0.185468	92.5743																																										0.298682	71.8246
0.203424	92.5739	0.176508	75.1567	0.15349	92.701																																										0.21748	72.715
0.186985	92.5743	0.225334	76.2252	0.187446	92.7493																																										0.198099	73.2929
0.154691	92.701	0.118919	76.4952	0.159402	93.0144																																										0.220549	73.3031
0.188678	92.7493	0.197444	76.884	0.159052	93.9123																																										0.164995	74.3778
0.160381	93.0144	0.118734	77.1245	0.100823	93.9313																																										0.158782	74.4393
0.160341	93.9123	0.206215	77.2399	0.171028	94.0112																																										0.226697	74.525
0.102428	93.9313	0.17383	77.2545	0.145385	94.1733																																										0.167193	74.658
0.172146	94.0112	0.18076	77.4888	0.221355	95.3928																																										0.164238	75.3028
0.149075	94.1733	0.176684	77.4976	0.139665	95.8859																																										0.137095	75.6609
0.222507	95.3928	0.222562	77.5044	0.192735	96.5078																																										0.183818	75.6724
0.141977	95.8859	0.163423	78.0342	0.222953	96.7351																																										0.142112	76.0812
0.194188	96.5078	0.248431	79.5807	0.216859	96.943																																										0.149709	76.6447
0.225446	96.7351	0.170461	79.8999	0.147883	98.5622																																										0.159593	76.9766
0.220049	96.943	0.110103	79.9873	0.300203	99.388																																										0.181026	77.0707
0.149365	98.5622	0.23124	80.0769	0.121534	100.291																																										0.180337	77.7153
0.301374	99.388	0.16451	80.3628	0.142773	100.524																																										0.144305	78.3772
0.122948	100.291	0.140154	80.6739	0.160962	100.673																																										0.195247	78.4922
0.144953	100.524	0.156383	81.1427	0.121876	101.066																																										0.258061	78.6124
0.162244	100.673	0.130086	82.2037	0.15603	102.219																																										0.170634	78.9202
0.123945	101.066	0.239407	82.7466	0.101835	102.576																																										0.117785	79.418
0.157213	102.219	0.144924	82.8369	0.167461	105.902																																										0.12421	79.5445
0.10368	102.576	0.210314	83.1146	0.185187	106.485																																										0.189872	80.1305
0.168601	105.902	0.145834	83.4851	0.199961	106.848																																										0.130291	80.7107
0.186432	106.485	0.188046	83.5299	0.173313	107.42																																										0.137848	81.6157
0.201709	106.848	0.16392	83.5631	0.114181	107.468																																										0.274183	82.8705
0.175237	107.42	0.247797	84.2756	0.102618	109.151																																										0.17417	83.0144
0.103907	109.151	0.168425	84.3479	0.150689	110.206																																										0.185209	83.1665
0.152459	110.206	0.275804	84.9518	0.11797	112.466																																										0.175382	83.4184
0.119234	112.466	0.129322	85.7082	0.140591	113.21																																										0.151491	84.5
0.142003	113.21	0.108961	86.0527	0.169704	117.438																																										0.14972	85.5904
0.171137	117.438	0.121308	86.3265	0.16207	117.842																																										0.101972	86.3251
0.164475	117.842	0.109354	88.8549	0.110663	118.012																																										0.198944	86.4241
0.112119	118.012	0.16971	88.8989	0.192057	119.883																																										0.115079	86.9868
0.19323	119.883	0.207968	89.151	0.138264	121.794																																										0.132617	87.1178
0.139325	121.794	0.103808	90.5595	0.112033	123.263																																										0.177354	87.1215
0.113882	123.263	0.110008	90.6116	0.109664	124.723																																										0.118256	87.9426
0.110668	124.723	0.138492	90.7788	0.13307	131.758																																										0.14511	88.2974
0.134204	131.758	0.157217	92.6075	0.15849	134.832																																										0.18278	89.5277
0.15997	134.832	0.133493	94.5232	0.109604	135.178																																										0.100818	89.5297
0.110752	135.178	0.114612	95.3865																																												0.138445	89.752
		0.128176	96.9548																																												0.154348	89.971
		0.108628	97.9231																																												0.147575	91.3463
		0.12182	100.461																																												0.12825	91.6995
		0.142642	100.91																																												0.110044	92.3989
		0.124622	101.442																																												0.101274	92.9098
		0.163807	101.467																																												0.143508	94.1745
		0.136746	102.337																																												0.169575	96.6736
		0.143793	102.376																																												0.133979	97.8401
		0.159229	102.533																																												0.117219	100.122
		0.152819	102.862																																												0.126775	100.581
		0.123281	103.941																																												0.138559	100.7
		0.138532	105.784																																												0.157949	100.781
		0.133297	106.69																																												0.181618	103.728
		0.166854	106.911																																												0.106675	104.363
		0.128618	109.111																																												0.106621	105.062
		0.135452	109.263																																												0.139943	106.049
		0.125802	110.571																																												0.132854	106.384
		0.166551	112.451																																												0.163706	107.528
		0.156389	114.431																																												0.107674	109.453
		0.10398	115.869																																												0.151029	110.186
		0.120916	121.147																																												0.145512	115.301
		0.139694	121.393																																												0.113681	118.286
		0.150297	121.399																																												0.158283	119.001
		0.108433	123.66																																												0.103996	120.451
		0.108312	126.731																																												0.120921	122.155
																																															0.112227	122.878
																																															0.125632	124.445
																																															0.101561	124.92
																																															0.119383	127.689
																																															0.126344	128.439
																																															0.135507	130.232
																																															0.138575	140.082
G. Normalized intensity of positive pSmad2/3 nuclei vs. Cell tier from the YSL (Lateral)
50% epiboly																																											Germ ring
Lateral view
Control MO																							sqt + cyc MO																				Control MO
Ratio	Distance	Ratio	Distance	Ratio	Distance	Ratio	Distance	Ratio	Distance	Ratio	Distance	Ratio	Distance	Ratio	Distance	Ratio	Distance	Distance Bin (um)	Cell tier	AVG	SD		Ratio	Distance	Ratio	Distance	Ratio	Distance	Ratio	Distance	Ratio	Distance	Ratio	Distance	Ratio	Distance	Distance Bin (um)	Cell tier	AVG	SD			Ratio	Distance	Ratio	Distance	Ratio	Distance	Ratio
0.94969	0	0.756663	0	0.70052	0	1.01686	0.656696	0.547642	0	1.50731	0	0.971981	0	0.689046	1.31711	1.25568	2.78718	15	1	0.897437	0.348299		0.257072	0	0.147861	0	0.13333	0	0.110261	2.97913	0.258784	0	0.344988	0	0.218058	0	15	1	0.209827	0.0818083			0.56365	0	0.301582	0	0.416908	0	0.442576
0.895701	1.44005	0.888768	2.3714	0.967014	0.457303	0.806068	1.33917	1.17904	0.299855	1.44722	1.96586	1.27259	1.82454	0.574773	1.50404	0.909805	4.20413	30	2	0.679606	0.350685		0.220026	1.44475	0.125783	1.3343	0.149369	0.574406	0.161378	5.49489	0.296314	0.156373	0.197301	1.78546	0.412743	1.43329	30	2	0.198042	0.0747794			0.507071	1.38679	0.212849	1.5502	0.859559	3.14666	0.192036
1.37439	2.83035	0.560768	3.11215	0.68841	2.1806	0.668161	2.01102	0.538176	2.08494	0.952367	2.36639	1.65836	2.50784	0.597422	1.91693	0.97033	8.91704	45	3	0.457447	0.213357		0.10599	2.28153	0.225873	6.79152	0.164809	1.32448	0.145577	8.06029	0.360027	0.973259	0.28808	4.66107	0.319049	3.54394	45	3	0.170149	0.0552088			0.423152	3.03426	0.275368	2.60456	0.23126	3.86314	0.305687
0.789411	3.20406	0.941371	5.0253	1.08221	2.64739	1.40342	3.51168	1.05862	2.30999	1.59484	3.95996	1.44215	3.05017	0.834599	1.98098	0.787249	8.95101	60	4	0.315383	0.141173		0.235782	2.30015	0.236377	6.89891	0.159996	1.65588	0.150678	9.28785	0.219416	2.31146	0.280087	4.87719	0.387214	4.45036	60	4	0.165796	0.0535209			0.629359	3.6341	0.142212	2.76084	0.417995	3.90847	0.288746
1.15098	4.26688	1.2201	5.14698	0.97234	3.7813	0.821498	4.19339	1.07115	3.95714	1.19159	5.70533	0.950525	4.75903	0.525911	2.29042	0.599592	9.23607	75	5	0.230878	0.0921313		0.296548	3.17112	0.104784	6.97184	0.163223	5.88101	0.124217	9.75709	0.246426	4.32882	0.335637	9.01048	0.3729	4.6203	75	5	0.149377	0.0438972			0.435994	3.88748	0.231464	3.33279	0.395092	3.95904	0.608765
0.979963	5.24924	1.36097	6.80552	0.768167	3.7903	1.11831	4.20268	0.630856	4.63258	1.45574	6.98803	0.771727	4.85923	0.389822	2.923	1.06829	9.60148	90	6	0.18265	0.0639326		0.111947	4.14678	0.114975	8.96726	0.103062	5.92233	0.157426	11.148	0.238897	4.35014	0.184722	9.131	0.300121	5.4786	90	6	0.143154	0.0331968			0.487506	3.95417	0.235031	3.54338	0.43289	5.432	0.276705
1.03008	5.44136	1.05538	8.10655	0.89487	4.03261	0.634123	4.63533	0.505882	4.6919	2.21318	7.11511	1.62333	5.64259	0.593359	3.31449	1.17125	9.67317	105	7	0.164715	0.0579007		0.141546	4.63812	0.126174	9.04874	0.107498	9.45306	0.156055	11.8037	0.284539	5.41473	0.317706	9.9148	0.248541	5.5267	105	7	0.13385	0.0281994			0.375791	5.27631	0.37542	3.76318	0.539641	6.38357	0.292678
1.18445	5.70296	0.910158	8.19885	0.696997	5.52238	0.867009	4.99738	0.459101	5.58956	1.95403	7.62225	1.50567	5.66101	0.593372	3.87869	0.415449	10.1416	120	8	0.143442	0.0348971		0.21478	4.76704	0.120144	9.97913	0.101252	9.67123	0.120923	12.0889	0.305652	6.0698	0.22395	10.5249	0.21206	7.69604	120	8	0.129048	0.0304768			0.466791	6.38255	0.314228	4.16493	0.361341	6.98353	0.353425
0.671213	5.98126	1.06202	8.86367	0.941148	5.57393	1.51154	5.17323	0.739264	6.02022	1.15321	7.8416	1.09225	6.16314	0.829956	3.96422	0.737519	10.2038	135	9	0.125706	0.0189231		0.10466	4.84388	0.10333	12.3463	0.104983	15.4444	0.121825	12.5103	0.254274	7.10094	0.218746	10.5331	0.281303	8.2864	135	9	0.131779	0.030738			0.430016	6.43544	0.390087	4.65395	0.437495	7.1948	0.319748
1.42534	6.00907	0.905918	9.76751	0.720516	5.59229	0.727814	6.13536	0.403799	6.0767	1.31573	7.89337	1.44949	6.22747	0.610739	4.40695	0.637304	11.0143	150	10	0.10522	0.00668213		0.260598	5.12949	0.134288	13.6361	0.11734	16.5061	0.148704	12.7243	0.151739	7.10792	0.166733	10.5457	0.371301	8.97299	150	10	0.127703	0.0203553			0.528663	6.47237	0.282995	4.73524	0.411431	7.3637	0.267042
0.880178	6.1083	1.19151	11.0803	0.546016	5.76364	0.602883	6.8823	0.616837	6.66969	1.84845	8.48351	1.02964	7.28583	0.624861	5.46992	0.586199	11.1472						0.16238	5.27671	0.100209	23.3566	0.105513	17.3808	0.110991	13.6407	0.283529	7.34616	0.207444	10.7888	0.355364	11.5263							0.451851	6.77968	0.263677	4.77711	0.398573	7.38669	0.370844
1.06929	6.60987	0.926609	11.7406	0.829835	5.79699	0.709274	7.28325	0.469945	6.68223	1.50019	9.1399	1.38889	7.58638	1.00741	6.00327	0.802424	11.8142						0.138541	5.79087	0.135304	23.4859	0.104918	18.4881	0.109579	14.5044	0.2683	8.86056	0.288944	11.3714	0.311018	11.5814							0.486947	7.1044	0.314335	5.04892	0.300522	7.49719	0.343807
0.807321	6.71678	0.925691	12.5143	0.526892	6.4028	0.558601	7.75029	0.620095	6.88099	1.36652	9.95375	0.920116	7.60361	0.337057	6.01379	0.800207	12.251						0.176408	6.24169	0.119896	23.7359	0.107193	21.4655	0.109007	14.8523	0.269843	9.12762	0.328065	11.4496	0.392246	11.8859							0.549437	7.14167	0.289409	5.0862	0.46386	7.74135	0.413423
0.991437	6.7889	1.05029	12.5241	1.057	6.4845	0.60526	8.53758	0.689555	7.12325	1.50909	10.5523	1.28422	7.65976	0.654159	6.37676	0.786782	12.7608						0.146839	6.51279	0.136333	25.4874	0.179547	22.3728	0.112532	15.9256	0.215887	10.1579	0.22134	12.2041	0.295929	12.1211							0.595429	7.184	0.310996	5.17571	0.606815	7.7693	0.291396
1.66669	6.92063	0.976278	12.9886	0.83074	7.52658	0.465349	9.0802	0.368082	7.64251	1.46098	10.954	1.04317	8.20784	0.602446	7.62287	0.281105	12.9532						0.105269	7.19312	0.112957	26.0319	0.119191	22.6823	0.121839	19.1234	0.173372	10.3198	0.242236	12.5935	0.123855	12.4835							0.50896	7.68293	0.189687	7.05831	0.532065	8.11355	0.339154
1.05471	6.96514	0.809757	13.2779	0.670164	7.64571	0.46073	9.08879	0.710468	8.37914	1.61037	11.7722	0.929757	8.23725	0.865278	8.84657	1.0808	13.1934						0.264756	7.35219	0.150396	27.0708	0.13764	26.6227	0.211672	20.6907	0.246916	11.0379	0.254504	12.956	0.367031	12.8213							0.48882	8.22454	0.241763	7.13934	0.373174	8.73904	0.301976
1.04191	7.21639	0.808619	13.4655	1.0411	8.08497	0.829391	9.88221	0.925121	8.56648	1.19799	12.0621	0.862672	8.50108	0.697476	9.25906	0.979611	13.3471						0.228927	7.50369	0.130338	27.5144	0.121605	26.9442	0.160458	20.9482	0.234851	11.2197	0.164022	13.3004	0.246189	13.635							0.662327	8.50983	0.454112	7.55866	0.411058	8.78621	0.288969
1.29125	7.60575	1.08143	13.4713	0.673927	8.53831	1.29156	10.3977	0.585364	9.42608	1.54139	12.6721	0.870986	8.83915	0.422678	9.64292	1.13044	13.3493						0.204952	7.53358	0.154274	27.7202	0.100071	32.4252	0.22587	24.6495	0.216845	12.4716	0.111343	13.4634	0.364661	13.6404							0.769935	8.76446	0.220693	7.66716	0.470544	9.72881	0.436744
0.891309	7.75542	0.866667	14.2457	0.629485	8.56962	0.819945	11.2381	0.918656	9.54868	1.11842	12.7926	0.526014	10.0103	0.508709	10.3901	0.934308	13.5432						0.16611	7.72712	0.172947	27.9753	0.128066	32.685	0.186104	26.72	0.132099	12.6743	0.220798	13.639	0.254162	15.2847							0.618987	8.82147	0.115597	8.32695	0.413298	9.96077	0.327865
1.14028	7.80856	0.74165	14.523	0.788453	9.18016	0.83036	12.0664	0.991046	9.56081	1.20922	12.8058	1.10703	10.9986	0.292252	10.6059	0.875139	13.6521						0.124251	8.23998	0.115971	28.172	0.159958	33.2796	0.137236	28.6029	0.113932	12.7626	0.208944	14.3255	0.321167	15.3433							0.538987	8.8624	0.213124	8.37098	0.511229	9.99991	0.318343
0.934635	8.19027	0.869248	14.8832	0.66841	10.9679	0.71791	12.5974	0.992401	9.59456	2.39671	13.169	0.871139	11.1033	0.394472	11.28	1.23801	13.8325						0.206345	8.40349	0.145509	31.9339	0.13527	34.5391	0.121269	28.6918	0.140119	12.8514	0.225196	15.3047	0.515647	15.4334							0.601596	9.00268	0.162136	8.49891	0.415574	10.2954	0.312781
0.685412	8.45562	0.902553	15.7118	0.681626	11.9209	0.458119	13.3667	0.854504	9.66063	1.25102	13.2699	0.679078	11.632	0.721245	11.4938	0.950328	13.9441						0.149058	9.76109	0.187806	33.9391	0.118324	34.858	0.164809	28.796	0.292757	13.155	0.226947	15.5688	0.250822	16.0169							0.491519	9.29443	0.384645	8.54046	0.334895	10.2993	0.235338
0.732168	8.53452	1.04314	16.8152	1.1216	12.6928	0.640018	13.4318	0.412242	10.4021	1.34075	15.6197	0.597819	13.0638	0.615842	11.9225	1.24123	13.9679						0.133258	12.8129	0.125724	37.3168	0.116473	35.2693	0.161694	30.0019	0.237073	13.7176	0.146264	15.5876	0.236197	16.0489							0.696777	9.65422	0.182916	8.69844	0.437493	10.536	0.292749
0.666874	9.52941	0.94973	16.9032	1.01707	12.8815	0.810429	13.6883	0.438937	10.6672	2.84521	15.9616	0.916511	14.3661	0.578132	12.3622	0.821804	14.1406						0.109458	14.0017	0.106751	38.0065	0.156735	35.6565	0.128037	30.6615	0.181246	14.1709	0.285269	15.5953	0.312433	16.2319							0.381281	9.66512	0.225456	8.92475	0.407428	10.748	0.278127
0.845181	9.92055	0.862581	17.4258	0.73538	12.9091	0.634996	14.1643	0.84658	10.7327	0.866057	16.3179	0.782681	16.0463	0.304985	12.5133	0.718621	15.0845						0.143824	14.0601	0.114342	39.3563	0.114285	36.0523	0.131626	31.9919	0.202323	14.2195	0.243438	16.8778	0.424067	16.2328							0.448202	9.87723	0.158599	8.94188	0.418972	11.4157	0.341517
0.759162	10.0677	1.4935	17.4711	0.567368	12.9941	0.491556	14.4432	0.858903	10.9515	0.812125	16.5055	0.401204	16.667	0.785064	12.6376	0.651804	15.4354						0.115763	15.7523	0.137305	40.6609	0.10842	36.3171	0.1223	32.5787	0.358967	14.5615	0.158598	16.9021	0.24785	16.2843							0.424805	10.1471	0.126757	9.05064	0.380577	11.8731	0.221184
0.624491	10.1075	0.824208	17.6784	1.34279	13.1454	0.779643	14.6154	0.863169	11.398	2.27234	16.6632	0.341225	16.6999	0.62928	13.1406	0.542684	15.4665						0.101638	17.3604	0.122992	41.2325	0.111881	36.3922	0.150645	32.8506	0.163629	14.6814	0.279964	16.9339	0.320765	17.025							0.486914	10.7608	0.264388	9.12531	0.287886	11.9999	0.391274
0.814093	10.229	1.11245	17.7681	0.949551	13.2863	0.743214	14.6923	0.524345	11.4796	1.32562	17.4285	0.896052	17.0577	0.6635	13.8624	0.570867	16.1599						0.219845	17.7406	0.150942	42.6524	0.103316	37.1451	0.17022	33.7487	0.134936	14.8872	0.239615	16.9979	0.400406	17.4717							0.709097	11.207	0.224211	9.19935	0.286224	12.0397	0.193712
0.891038	10.2777	1.57488	18.8028	0.86029	13.349	0.563422	14.8739	0.421037	12.0035	0.851379	18.1077	0.834978	17.0994	0.451366	14.2785	0.64884	16.1656						0.166619	17.9021	0.130596	42.7982	0.139241	39.5459	0.113366	34.9359	0.282783	14.9233	0.265268	17.5176	0.308322	17.4919							0.418992	11.3685	0.310908	9.81485	0.367675	12.1424	0.281242
0.757523	10.3188	0.854438	20.0948	0.771261	13.3658	0.261027	15.4171	1.02483	12.0442	0.634559	18.6272	0.903186	17.2774	0.659091	14.3136	0.621403	16.4319						0.148823	18.5533	0.196835	46.7017	0.137376	39.7873	0.150868	40.1737	0.220187	15.4503	0.288022	17.7626	0.334591	17.7351							0.409309	11.3986	0.218003	10.0505	0.379628	12.737	0.275608
1.71472	10.3368	0.907293	20.4545	0.413703	15.3166	0.569774	15.5821	0.896031	12.5258	1.05342	18.7723	1.42731	17.639	0.481582	14.5163	0.896391	16.5219						0.154222	18.688	0.138556	48.8735	0.123039	40.7693	0.115218	41.1693	0.170675	15.5793	0.136137	18.5797	0.224444	19.0834							0.367443	11.7099	0.223246	10.4114	0.329621	12.8675	0.584028
1.16976	10.6459	0.350695	20.7414	0.533351	15.5096	0.325685	16.0237	0.470485	12.704	0.861987	18.8093	0.905203	17.8315	0.147315	14.5491	0.709124	16.7896						0.138545	19.7722	0.102731	48.9282	0.114435	42.8231	0.104725	43.7809	0.208693	15.6212	0.20968	19.3145	0.336641	19.4683							0.576926	12.2836	0.330364	10.4466	0.263251	13.2654	0.281459
1.64688	10.6902	0.582575	20.8036	0.661096	16.1588	0.408705	16.1547	0.35657	12.7142	1.69286	19.1707	0.884548	17.9401	0.956946	14.774	0.7904	16.8181						0.115686	20.4319	0.153797	55.0029	0.100796	43.2276	0.164425	45.7497	0.192202	15.7364	0.192006	19.4604	0.204866	19.8354							0.559544	12.3255	0.501762	10.5584	0.46131	13.377	0.263945
0.496316	12.0475	0.822545	20.9317	0.576028	16.2511	0.742727	16.5069	0.446784	12.9114	1.21037	19.4021	0.729521	18.0055	0.5049	15.0884	0.995152	16.8584						0.213182	21.2209	0.144672	56.1867	0.100691	44.8072	0.14168	46.2527	0.135213	15.8014	0.139831	19.4918	0.211695	20.0478							0.503599	12.3895	0.304125	10.5753	0.497845	13.4863	0.334172
0.837069	12.5249	0.492524	21.1894	0.515976	16.9253	0.813152	16.514	0.85816	13.2951	0.636524	19.5103	0.477854	18.213	0.737632	15.1975	0.919245	17.3251						0.117828	22.7548	0.122337	56.2354	0.136353	46.1339	0.14253	49.8431	0.280235	16.1715	0.286761	21.4822	0.279216	20.072							0.390024	12.4413	0.176316	10.7376	0.462429	14.1916	0.218559
1.18695	12.705	1.09764	21.9535	0.80051	17.1844	0.470859	16.9097	0.65851	13.4331	0.951533	19.5275	0.855744	18.2341	0.286103	15.5866	0.998193	17.3811						0.110365	22.9152	0.17806	58.3383	0.136758	46.5002	0.149453	50.4469	0.379452	16.2051	0.22863	21.912	0.159237	20.8682							0.317586	12.6392	0.183983	10.8302	0.436406	14.2949	0.313954
0.716592	12.8018	0.792714	22.7797	0.643376	17.3866	0.480559	17.1339	0.758273	13.4906	1.18245	19.7964	0.788384	18.4081	0.455495	16.048	0.770381	17.4211						0.16471	23.0477	0.131416	60.0078	0.132361	46.9771	0.142164	61.7887	0.167443	16.51	0.191589	22.252	0.240305	21.2165							0.448041	12.9571	0.305317	10.9982	0.382793	14.9722	0.28642
1.13102	12.9951	0.774897	22.935	0.354507	17.7603	0.696293	17.1427	1.34497	13.5443	1.64079	19.8198	0.506733	18.4449	0.540756	16.1602	0.677566	17.7819						0.129243	24.9364	0.113447	60.5463	0.132298	47.007	0.10776	66.3594	0.243148	16.5835	0.219187	22.2618	0.236808	21.8114							0.458495	14.2239	0.194073	11.3411	0.569674	15.03	0.25094
0.649055	13.135	0.792434	22.9845	0.487584	17.9243	0.26143	17.1818	0.522667	13.6424	1.27463	20.0532	0.833963	18.4798	0.960604	16.2151	0.719496	18.0272						0.149915	25.3924	0.117456	67.0828	0.11351	47.9627	0.134612	70.4074	0.105273	16.6556	0.203531	22.3219	0.248829	22.3776							0.375921	14.2924	0.19688	11.4461	0.37351	15.513	0.270546
1.15594	13.2155	0.625659	24.4813	0.428515	17.9321	0.642678	18.1421	1.16457	13.7059	1.54603	20.1432	0.751841	18.4994	0.660809	16.3406	0.834821	18.2174						0.190192	25.646	0.142964	68.6144	0.176365	52.9423	0.110073	70.8083	0.119259	16.7456	0.29183	22.5793	0.224061	22.7433							0.349087	14.3059	0.227058	11.5001	0.505505	15.6374	0.296507
0.576588	13.7255	1.27474	24.7113	0.544327	18.0497	0.410505	18.3092	0.505122	13.9322	0.708227	20.1733	0.766491	18.7476	0.582602	16.3719	0.727843	18.5178						0.11169	25.7916	0.102447	68.7447	0.105051	53.5737	0.126057	71.418	0.244482	17.3901	0.193228	23.515	0.263907	23.4633							0.456851	14.634	0.157378	11.5698	0.400051	15.8015	0.227345
1.40034	13.8902	0.970091	24.9801	1.24121	18.1412	0.431685	18.4197	0.407508	14.6986	1.49933	20.2561	0.390931	18.8193	0.413839	16.3839	0.830241	19.2728						0.187184	27.0509	0.10779	69.1153	0.10313	53.9995	0.118813	71.5518	0.301005	17.8007	0.228743	23.9766	0.276583	24.1852							0.395766	14.6549	0.262257	11.6698	0.273027	16.1314	0.296482
1.5525	14.0189	0.700381	25.3234	0.508305	18.2563	0.496336	19.4708	0.426151	15.0995	2.93341	20.3205	0.575487	18.9165	0.591511	16.5236	0.728306	19.6142						0.172593	27.1107	0.149845	71.5044	0.122874	55.4989	0.127759	83.8006	0.205459	18.5192	0.178654	24.2028	0.164674	25.6487							0.474126	14.6695	0.19232	11.8672	0.351145	16.241	0.27513
1.46466	14.0712	0.858735	25.8532	0.49579	18.2695	0.644068	19.6273	0.835356	15.9418	0.749422	20.5997	1.38607	19.7448	0.207278	16.7761	0.918313	19.6547						0.119346	27.6504	0.196645	73.5646	0.111634	55.5645	0.100745	83.9028	0.259825	18.7206	0.163774	24.5017	0.366823	26.7676							0.400494	14.8825	0.2688	11.9727	0.420061	16.9801	0.337108
0.885959	14.2955	0.615434	25.9644	0.763128	18.4876	0.808113	20.691	0.414624	15.9762	1.23262	20.6442	0.27857	20.2954	0.601926	16.8858	0.631822	19.795						0.129208	28.8222	0.116025	76.9442	0.138814	59.4889	0.10652	85.7196	0.133431	20.0604	0.123694	26.2496	0.267446	27.006							0.654395	15.1072	0.325723	12.0029	0.505489	17.579	0.200132
1.51423	14.5937	0.982915	26.0098	0.614346	18.4881	0.604456	20.6942	0.347103	16.1158	0.667765	20.8426	0.718026	20.6659	0.499958	16.9648	0.658558	20.4529						0.148357	31.3698	0.132424	77.0774	0.120231	60.9463	0.10044	91.3155	0.205916	21.1033	0.144864	27.4409	0.30398	27.5789							0.703723	15.2452	0.260234	12.2118	0.43581	17.5834	0.314635
0.852774	14.7959	0.692566	26.2344	0.548006	18.5329	0.505464	21.4059	0.680145	16.1636	0.774107	20.8932	0.895082	21.1878	0.398056	17.6264	0.778043	20.5283						0.135836	32.6628	0.173702	81.0425	0.114038	64.0576	0.104249	111.911	0.213977	21.7465	0.210287	27.7946	0.104703	27.8777							0.38981	15.7389	0.218788	12.7978	0.358735	17.5944	0.256758
2.04177	15.2282	0.450928	26.2634	0.562211	18.564	0.510763	22.0652	0.613906	16.6709	0.898045	21.206	0.803615	21.6124	0.674013	18.0722	0.358355	20.598						0.128063	32.6754	0.180065	82.3259	0.126099	65.4139	0.111691	118.809	0.268882	21.7952	0.258776	28.9941	0.107533	27.9705							0.406177	15.9721	0.385231	13.1598	0.274331	17.9785	0.310402
0.598274	15.4337	0.498787	26.8946	0.493104	19.0518	0.657574	22.2788	0.363455	16.9997	1.30084	21.2166	0.782292	21.7202	0.630831	18.4391	0.669926	20.6221						0.156613	32.6924	0.112352	82.8581	0.142634	65.4696			0.266301	21.859	0.212254	29.097	0.315706	28.5118							0.623116	16.2174	0.184841	13.8606	0.409716	17.9827	0.397558
0.780828	15.5833	0.819607	27.4258	0.419626	20.3636	0.35	22.6325	0.56427	17.3502	2.3656	21.8424	0.564812	22.3884	0.618488	18.9614	0.942444	20.7704						0.162463	34.3891	0.148726	86.2541	0.104443	65.9153			0.187656	22.2236	0.292862	29.6692	0.120489	29.6394							0.39719	16.4856	0.222075	13.9343	0.350318	18.0842	0.270459
0.758242	15.5919	1.40282	27.5614	0.45349	20.4442	0.600058	22.7377	0.78693	17.5008	0.906759	22.7774	0.929926	23.1692	0.415733	19.1247	0.668034	20.9451						0.104698	34.9286	0.105997	91.4471	0.104961	69.287			0.224704	22.6581	0.159258	30.3754	0.286321	30.1783							0.385224	16.524	0.162814	14.3388	0.394743	18.4744	0.294099
1.55523	15.8725	0.761574	27.6027	0.313959	20.4953	0.523579	23.1475	0.340274	17.7178	0.865722	22.8403	0.669332	23.196	0.386321	19.6313	0.858191	21.068						0.100661	37.0786	0.110901	91.6158	0.120737	70.0458			0.122166	22.7162	0.156335	30.7098	0.171776	30.1963							0.524936	16.5923	0.176023	15.0704	0.30275	18.7655	0.318917
1.15296	16.6758	0.572336	27.8434	0.66605	20.9731	0.58409	23.3731	0.485964	17.7312	1.24374	23.3145	0.545101	23.7609	0.650272	20.5012	0.608394	21.312						0.10392	37.9084	0.155395	95.8155	0.105893	73.0339			0.17706	22.8665	0.168175	30.9398	0.10418	30.3784							0.674021	16.6344	0.182124	15.1888	0.438251	18.7869	0.190256
0.546285	16.6813	0.826391	27.9693	0.657213	21.2234	0.552299	23.9543	0.472306	17.7779	0.869222	23.6997	0.613016	23.7998	0.559527	20.9735	0.879343	21.4609						0.134815	38.5987	0.129098	98.4685	0.122587	73.9007			0.14483	23.3821	0.23245	31.29	0.2219	30.3874							0.26044	16.6491	0.251457	15.1912	0.332199	19.0017	0.453371
0.53655	16.8302	0.664812	28.0149	1.0232	21.466	0.291016	24.0269	0.972335	18.0079	1.02435	24.1801	0.579505	23.821	0.494066	21.3571	0.750961	21.5049						0.137768	41.8838	0.112041	99.5149	0.117881	76.5801			0.167356	23.4197	0.243503	31.6882	0.237924	31.0671							0.401904	16.7932	0.35659	15.4263	0.410613	19.1919	0.374727
0.514661	16.8502	0.888284	28.1035	0.42654	22.6072	0.508021	24.4019	1.21464	18.0412	0.781494	24.2194	0.828602	24.0688	0.618367	21.4892	0.62383	21.7479						0.14718	42.2352	0.164378	99.6177	0.118153	77.081			0.10488	23.5458	0.20699	32.371	0.192207	31.9751							0.491337	17.0279	0.136697	15.6715	0.466663	19.247	0.321816
1.63994	16.9156	0.330706	28.2904	0.361839	22.6787	0.384958	24.4854	0.653542	18.4301	0.986955	24.3243	0.644479	24.4466	0.479498	21.8313	0.673081	21.8539						0.115575	43.3034	0.136951	99.8886	0.144458	77.5337			0.237446	23.5572	0.170364	33.3997	0.195391	32.7839							0.393476	17.033	0.256703	16.0845	0.238703	19.2706	0.293334
0.88064	17.1542	0.229943	28.3242	0.71015	22.7432	0.278401	24.5222	0.667872	18.9464	1.1564	24.3443	0.658649	25.5227	0.489887	21.8537	0.609356	22.009						0.105235	44.1471	0.100287	100.938	0.106935	77.7411			0.102773	24.2941	0.189784	34.741	0.331198	32.8738							0.944884	17.1642	0.280558	16.1958	0.357056	19.8404	0.195908
0.552825	17.232	0.508993	28.445	0.393461	23.4604	0.434904	25.5578	0.612438	19.6811	1.77341	25.7929	0.162202	25.8087	0.101055	22.0335	0.716362	22.0626						0.133707	45.0595	0.148139	101.572	0.152965	78.1227			0.256448	24.3441	0.135459	34.8238	0.19581	33.0124							0.711118	17.2964	0.210461	16.2933	0.591283	20.0743	0.211112
0.784847	17.4212	0.746819	28.5646	0.531017	23.777	0.120838	25.846	1.2621	19.712	0.723322	26.1046	0.721127	26.7484	0.236263	22.1755	1.04705	22.0837						0.166734	45.2218	0.126521	103.058	0.105357	83.8099			0.145177	24.426	0.227168	35.6816	0.212143	34.2162							0.482295	17.4615	0.329798	16.4999	0.259254	20.2153	0.293964
0.771376	18	1.01034	28.5753	1.19836	23.9622	0.356059	26.1083	0.455161	20.0354	0.295503	26.8269	0.751248	27.2722	0.199624	22.5342	0.992979	22.1085						0.119895	45.7645	0.153482	103.734	0.10596	85.8038			0.190898	24.7543	0.23421	35.7498	0.207922	34.3584							0.432664	17.5692	0.148968	16.5541	0.3185	20.4765	0.308444
1.63542	18.0918	0.597378	28.6792	0.867421	24.2879	0.404857	26.9835	0.426466	21.2127	1.03401	27.1049	0.380526	27.3928	0.391847	22.9233	0.396015	22.3581						0.106582	46.2456	0.122034	106.946	0.101979	91.0751			0.255034	24.9973	0.285773	35.9602	0.23722	35.1956							0.601892	18.0601	0.293683	17.13	0.263065	20.9245	0.255194
0.572793	18.0974	0.802784	28.7628	0.773449	24.3726	0.390109	27.4792	0.283038	21.2644	0.375806	27.5125	0.523952	28.2203	0.403895	23.1895	0.763182	22.6545						0.138945	46.3242	0.192463	108.076	0.110704	92.2708			0.131778	25.7227	0.116315	37.1118	0.240931	35.6551							0.395267	18.2159	0.332406	17.4045	0.315974	20.9783	0.342341
0.533952	18.1087	0.90563	29.4312	0.520881	24.8464	0.269195	27.6696	0.185616	21.2746	0.719282	27.9037	0.514634	28.6256	0.534893	23.2365	0.976198	22.7627						0.105644	46.5966	0.187322	111.67	0.138323	96.9592			0.215463	26.2239	0.238496	37.2732	0.140255	36.0081							0.399243	18.2949	0.206852	17.722	0.158432	21.1449	0.275687
0.685015	18.8386	0.411369	29.469	0.599493	25.1025	0.30627	28.3311	0.365018	21.3847	1.25294	27.9508	0.556638	28.8608	0.534492	23.3309	0.485205	23.9699						0.158118	48.2609	0.193662	111.777	0.125405	97.8793			0.209993	26.3274	0.20363	37.4471	0.208433	36.0293							0.401038	18.6094	0.25984	17.9369	0.340642	21.2739	0.24183
0.715747	18.8895	0.649274	29.501	0.362505	25.3271	0.267075	28.4875	0.612166	21.6375	0.712026	28.0858	0.68256	29.1629	0.345138	23.5957	1.00162	25.0468						0.125794	49.1093	0.108658	112.435	0.108488	102.608			0.14397	27.0544	0.21351	38.3992	0.121162	36.7833							0.800051	18.9714	0.229646	18.2354	0.442152	21.3023	0.217712
0.665895	19.0724	0.739228	29.6971	0.355269	25.3669	0.365731	29.2244	1.12337	21.6897	1.20945	28.243	0.363011	30.1923	0.408631	23.6239	0.701733	25.0994						0.172589	50.3783	0.101956	113.747	0.12135	103.978			0.113671	27.8574	0.260615	38.6821	0.259766	36.8824							0.390755	18.9853	0.176295	18.3864	0.317167	21.3315	0.258151
1.01434	19.1949	0.451852	29.8446	0.431505	25.6424	0.405839	29.4707	0.535412	21.8719	2.09923	28.3819	0.640827	30.467	0.466143	23.6927	0.580237	25.1589						0.121207	54.1883	0.118201	114.04	0.112907	110.069			0.209753	28.7531	0.206063	39.9244	0.170744	38.4364							0.536549	19.1253	0.226031	18.4316	0.333704	21.4758	0.169957
0.454489	19.2401	0.752296	30.2301	1.11185	26.306	0.462351	29.9645	0.547822	21.9099	0.63702	29.0078	0.391245	31.176	0.477392	24.0359	0.829362	25.1691						0.141635	55.0729	0.10743	115.517	0.11308	114.197			0.179384	29.0221	0.213608	39.926	0.133897	39.4656							0.354355	19.3487	0.168346	18.5999	0.319262	21.5187	0.258948
0.702458	19.8985	0.566624	30.2479	0.470445	26.5339	0.214809	30.4984	0.450276	22.0314	0.858032	29.4752	0.347697	31.2823	0.480422	24.1802	0.715196	25.6063						0.102348	55.1625	0.121318	116.206	0.106539	118.381			0.220689	29.5983	0.133692	42.4327	0.184645	39.958							0.285842	19.7738	0.258338	18.8592	0.504041	21.5239	0.107698
1.3031	20.2076	0.760997	30.5557	0.375958	26.5393	0.390016	30.8322	0.2046	22.1661	0.381615	29.7045	0.449906	31.6461	0.388321	24.5565	0.863728	25.6794						0.155402	57.1944	0.147679	116.638	0.104587	119.625			0.165943	29.9665	0.22358	42.4627	0.13241	41.2796							0.31686	19.9328	0.14561	18.9737	0.394466	21.6257	0.264123
0.568583	20.3244	0.677341	30.6476	0.337922	26.9249	0.516014	31.0261	0.437215	23.0025	0.679238	30.0106	0.233351	31.7102	0.439361	25.0429	0.39917	26.0153						0.116077	58.8236	0.130909	117.081					0.14999	30.514	0.148791	42.6984	0.135015	41.4863							0.414922	19.9585	0.187333	19.3701	0.358757	22.1076	0.242798
0.417339	20.7683	0.852914	31.0905	0.376748	27.9268	0.328156	31.1094	0.860904	23.2528	0.462549	30.9645	0.164283	31.7336	0.407745	25.8947	0.863679	26.3255						0.106318	58.8647	0.10974	121.96					0.166121	30.5944	0.243334	42.92	0.366615	41.6582							0.28474	19.9602	0.21073	19.463	0.343192	22.1708	0.363257
1.18682	20.8266	0.942729	31.2127	0.651248	27.9277	0.547457	31.1151	0.671255	23.2715	0.704525	31.1224	0.63559	32.7377	0.458859	26.4732	0.704602	26.3397						0.121082	61.3188	0.149259	122.244					0.202224	31.1197	0.255407	42.9241	0.282801	42.1701							0.396784	20.0504	0.347111	19.4691	0.333965	22.4991	0.215315
0.51104	21.4668	1.04954	31.724	0.436188	28.2885	0.346339	31.1751	0.398509	23.3482	0.553032	32.0491	0.545495	33.7141	0.187072	26.6048	0.574962	26.3583						0.117193	61.8171	0.133221	123.83					0.110334	31.4132	0.118588	43.3598	0.108737	42.2624							0.377434	20.3213	0.180064	19.8203	0.480472	22.6027	0.295122
1.00408	21.5389	0.718267	32.0519	0.734615	29.0291	0.216032	31.6185	0.37326	23.4146	1.21062	32.1261	0.5763	33.9219	0.46507	26.6396	0.995384	26.5881						0.121668	62.9742	0.112445	126.616					0.217132	33.4066	0.206703	43.8135	0.259589	42.5679							0.356329	20.346	0.230508	19.8685	0.326122	22.8716	0.302479
0.700016	21.6171	0.732278	32.5823	0.446757	29.0926	0.6473	31.6316	0.429106	23.6755	1.06719	32.2104	0.346189	34.1903	0.637537	27.2888	0.777538	26.8328						0.112395	64.8835	0.126025	127.631					0.257291	33.7133	0.121939	44.4529	0.125776	42.9738							0.323462	21.1823	0.288684	19.8973	0.356611	23.1322	0.107461
1.10429	22.2194	0.504235	32.8212	0.394885	29.1083	0.28095	31.8359	0.442478	24.0568	0.562209	32.2127	0.183264	34.6936	0.268331	27.5422	0.503594	27.0817						0.128955	64.9434	0.100843	128.639					0.16849	34.0924	0.142132	45.4195	0.159104	43.1872							0.4908	21.2919	0.314727	20.1271	0.400304	23.2116	0.203031
1.37279	22.8223	0.650671	32.9491	0.698638	29.4711	0.23748	31.9472	0.375182	24.0855	0.66416	32.5387	0.207658	35.046	0.224591	28.4088	0.528924	27.2848						0.122986	64.9705	0.124074	130.739					0.211087	34.4994	0.246659	47.1571	0.148019	44.7563							0.374683	21.5214	0.258114	20.4294	0.312387	23.2377	0.24087
0.476156	23.0362	0.696985	33.5589	0.325118	29.4761	0.213794	32.8839	0.320271	24.2385	0.664971	32.731	0.256242	35.1271	0.406487	28.833	0.621307	27.4529						0.11747	68.4224							0.223168	34.9789	0.165843	47.5996	0.227929	44.8292							0.611842	21.6247	0.132089	20.4734	0.369647	23.2483	0.151312
0.646914	23.1717	0.687177	34.0524	0.914867	29.4877	0.450762	33.2094	1.07632	24.2845	0.530118	32.7525	0.680892	35.5907	0.139372	29.0188	0.959391	27.7051						0.11281	70.4403							0.193449	35.1559	0.116961	47.6251	0.283706	45.3153							0.692234	22.3602	0.140024	20.5911	0.225181	23.2804	0.331984
0.58085	23.4329	0.477065	34.1962	0.709936	29.5162	0.264352	34.4179	0.136491	24.7481	0.842977	33.0259	0.236756	35.7628	0.418617	29.1672	0.682465	27.7242						0.100982	70.5516							0.225902	35.1917	0.138787	47.9324	0.231517	46.7402							0.576877	22.442	0.22376	20.8597	0.317401	23.373	0.327201
0.463966	23.4446	0.710102	34.9907	0.436706	30.9016	0.417041	34.4302	0.699754	24.9137	0.842076	33.5172	0.454612	35.8159	0.440842	29.2411	0.354733	28.0714						0.108658	70.6149							0.111322	35.309	0.141419	49.5173	0.192391	47.646							0.342705	22.7188	0.212424	21.1424	0.375769	23.9559	0.271428
0.557157	23.5516	0.167834	35.0436	0.720398	31.0849	0.308084	35.6113	0.620922	25.4044	0.552311	33.962	0.456732	36.041	0.236532	29.3793	0.876441	28.0889						0.156675	74.609							0.188508	36.1635	0.172187	49.6084	0.167013	47.6957							0.37626	22.8083	0.229076	21.2979	0.37145	24.1574	0.272182
0.961611	23.7077	0.549907	35.3584	0.414436	31.1533	0.29564	36.2862	0.29715	25.4535	0.648657	34.3498	0.250791	36.5291	0.431834	29.5767	0.717994	28.6582						0.113257	75.0314							0.284551	36.6096	0.202311	49.7277	0.206614	48.1583							0.516862	22.9014	0.178282	21.763	0.218192	24.4409	0.103549
0.135218	23.7276	0.617109	35.5206	0.512722	31.6534	0.472454	36.3502	0.427452	25.9441	0.649524	34.3793	0.525132	37.9513	0.443431	29.5958	0.872375	28.7353						0.128792	77.4254							0.193498	36.9297	0.146206	50.2915	0.305194	48.2033							0.339674	22.9297	0.267262	21.9819	0.378617	25.0273	0.189056
0.558587	23.7924	0.467327	35.6543	0.4042	31.9138	0.323767	37.2548	0.761837	25.9967	0.653458	34.9548	0.34382	37.9673	0.220711	29.6559	0.477496	28.7535						0.112197	79.256							0.212806	36.9874	0.110208	50.5968	0.195581	49.4565							0.374653	22.9662	0.151675	22.1439	0.330789	25.0476	0.388671
1.18986	24.1473	0.451372	35.7562	0.445823	32.1039	0.319843	37.5246	0.296268	26.0196	1.10065	35.0531	0.419172	38.4962	0.364745	29.9251	0.742488	29.3129						0.142022	81.8368							0.232876	37.425	0.238361	51.6301	0.295847	50.8436							0.198854	23.0747	0.196453	22.1494	0.255513	25.2881	0.281859
0.776394	24.222	0.471505	35.8775	0.153847	32.1912	0.24758	38.5315	0.276251	26.0794	0.775036	35.316	0.286052	39.4486	0.381345	30.2666	0.654994	29.4797						0.110348	82.48							0.133731	37.8259	0.138559	52.4893	0.107799	51.015							0.465353	23.1227	0.163986	22.4112	0.343512	25.4895	0.23015
0.802925	24.7387	0.356028	35.9482	0.564109	32.3228	0.346605	39.8762	0.479263	26.5491	0.701399	35.6655	0.500518	39.6	0.411693	30.378	0.644763	29.6386						0.146197	82.4955							0.12843	37.9889	0.121076	55.3387	0.154011	51.588							0.965873	23.2522	0.241742	22.4808	0.304844	25.7046	0.336425
1.28991	24.8524	0.727229	36.0115	0.816348	32.9479	0.267511	40.8692	0.866901	26.7099	0.551856	36.0253	0.491074	39.8996	0.141382	30.4097	0.510853	29.8848						0.118138	83.6797							0.174523	39.354	0.240698	55.8325	0.192558	51.7065							0.701174	23.3533	0.191357	22.722	0.347971	25.9682	0.242331
0.861405	25.008	0.672109	36.3159	0.304674	33.0977	0.468833	41.0768	0.42562	26.7959	1.21494	36.0257	0.194748	39.9876	0.117585	30.5661	0.527271	29.9694						0.106501	84.3199							0.129445	39.7186	0.197899	57.0301	0.255724	53.5527							0.327754	23.7904	0.168228	22.7401	0.329358	26.2683	0.190159
0.914144	25.2039	0.906595	36.5947	0.315342	33.3289	0.281971	41.1446	0.443684	26.8297	0.85587	36.0757	0.550095	40.3068	0.393559	30.6178	0.583888	30.3616						0.117419	87.0502							0.245223	39.7701	0.202045	57.1295	0.243317	55.1712							0.274515	24.0069	0.220087	23.0383	0.322525	26.7364	0.250186
0.992629	25.2745	0.635867	37.2803	0.542462	33.34	0.327853	41.1561	0.666524	26.9303	0.714989	36.1692	0.370987	40.9748	0.323384	30.9907	0.771664	30.7755						0.121523	87.6573							0.191414	39.9011	0.288353	57.6442	0.119501	56.2598							0.354801	24.5576	0.214433	23.2325	0.590233	26.9998	0.100069
0.98757	25.4112	0.550009	37.5164	0.540575	34.1653	0.285853	41.2191	0.27381	27.0063	0.477327	36.7323	0.176854	41.2707	0.374508	31.4115	0.795241	30.7913						0.107233	88.7264							0.187718	41.2302	0.166468	58.1876	0.204542	57.3821							0.311527	24.7139	0.220501	23.3254	0.449546	27.1327	0.251469
0.555203	25.4274	0.368084	37.5781	0.314348	34.4673	0.268415	41.6002	0.225839	27.0434	0.4351	36.7954	0.367143	41.3405	0.502866	31.7111	0.432506	31.1619						0.125287	89.5942							0.106967	42.222	0.114212	58.3403	0.28152	57.7191							0.353039	25.1496	0.282068	23.5152	0.270946	27.4093	0.221278
0.471481	25.6329	0.497633	37.8244	0.870974	34.7042	0.149294	41.6626	0.396304	27.1891	0.698259	36.8505	0.462058	41.5989	0.108355	32.4267	0.701836	31.1902						0.126563	89.8673							0.129305	43.1943	0.255122	58.3874	0.126597	60.1742							0.274348	25.5238	0.220454	23.6408	0.285281	27.5599	0.345245
0.531928	25.8953	0.634811	37.8538	0.48851	34.7651	0.233468	41.6634	0.256301	27.3706	0.562976	37.2629	0.156226	41.7503	0.437928	33.2474	0.699686	31.5193						0.127465	90.7376							0.256404	43.8621	0.150709	58.9438	0.307349	60.5619							0.773896	25.6174	0.362786	24.1917	0.238149	27.7572	0.210238
0.631981	25.9497	0.85306	38.3519	0.275331	35.0178	0.302591	42.1442	0.383977	27.6458	0.523481	37.8793	0.481888	41.8637	0.392985	33.418	0.558251	31.8667						0.124266	90.7966							0.102227	43.9254	0.112675	59.3001	0.205333	60.9569							0.47655	25.7405	0.150852	24.3114	0.579848	27.9622	0.207021
0.5276	26.6456	0.764284	38.5501	0.338893	35.4945	0.152353	42.6816	0.662596	28.0203	0.340826	38.9898	0.417408	42.5394	0.341675	33.7284	0.456434	31.9083						0.107245	92.2086							0.165693	44.5264	0.112618	59.3814	0.127342	60.9779							0.390042	26.1382	0.233246	24.3872	0.344021	28.4468	0.233874
0.549419	26.7678	0.287355	38.7818	0.374088	35.5963	0.374177	42.7584	0.828587	28.1942	0.52169	39.2905	0.355437	42.6636	0.252091	33.7458	0.495334	32.0407						0.11201	92.6886							0.20664	44.8601	0.210035	59.4508	0.259389	61.1368							0.376867	26.3909	0.172856	24.5172	0.407011	28.6435	0.248647
0.898749	26.8237	0.563375	39.1415	0.212731	35.7159	0.344985	43.1697	0.412886	28.2149	0.645653	39.5389	0.337525	43.1683	0.440427	34.3071	0.479248	32.3142						0.134077	93.4924							0.173588	45.1261	0.142291	59.4931	0.235264	62.8923							0.651332	26.6432	0.199667	24.6389	0.306064	28.9083	0.138386
0.530212	27.107	0.67624	39.4599	0.274123	36.6614	0.189267	43.1807	0.412345	28.5514	0.373486	39.5422	0.298488	43.2978	0.347207	34.6848	0.473907	32.4679						0.148075	94.5528							0.130712	46.1122	0.173798	59.5243	0.140933	63.9059							0.436931	26.8827	0.194517	24.6644	0.437246	28.9216	0.353953
0.606168	27.267	0.521466	39.5792	0.238196	36.6628	0.350735	43.4298	0.508175	28.5669	0.637545	40.2491	0.336769	43.4577	0.113461	34.9213	0.656749	32.6739						0.109003	98.9682							0.270039	48.2144	0.186285	63.0705	0.185248	68.6024							0.684121	27.3363	0.259048	24.8926	0.37847	28.9467	0.264847
0.419697	27.3461	0.556485	39.7662	0.560861	36.8062	0.424174	44.0025	0.3108	28.6611	0.932585	40.2894	0.35432	43.7544	0.206648	35.0498	0.624227	32.8598						0.112369	99.8206							0.251246	48.9542	0.185644	64.2968	0.141376	69.1609							0.390571	27.6821	0.162062	24.9733	0.25346	29.2246	0.240316
0.442571	27.5487	0.560859	40.053	0.389137	37.1683	0.212126	44.1659	0.544564	28.9705	0.440466	40.5952	0.296687	43.901	0.417297	35.6325	0.619593	32.8964						0.113119	102.003							0.29631	49.1862	0.169647	64.8336	0.105874	69.4268							0.346619	27.8068	0.248488	25.2496	0.261531	30.3859	0.171806
0.599829	27.6666	0.506327	40.2541	0.404092	37.1985	0.283569	45.4721	0.309653	28.9748	0.637269	40.6222	0.445335	44.7287	0.171063	36.2017	0.602564	32.9378						0.102103	104.866							0.177787	49.2062	0.115637	65.2219	0.153111	70.7032							0.302879	27.9563	0.270912	25.4528	0.301509	30.3928	0.178327
0.970886	27.9217	0.861819	40.3001	0.377523	37.275	0.108734	45.9049	0.353554	29.4401	0.395358	40.9045	0.335945	45.6577	0.273914	36.5723	0.687432	32.9598						0.112784	105.884							0.214457	49.9416	0.12602	66.0241	0.105432	70.9686							0.288768	28.1572	0.10797	25.4759	0.472567	30.4881	0.225516
0.630015	27.9259	0.228611	40.834	0.234186	37.2826	0.213828	46.4522	0.317146	29.7103	0.559654	41.0043	0.23522	45.7904	0.112268	36.6541	0.65502	33.0074						0.138139	106.315							0.130607	50.1696	0.165864	66.9666	0.15695	74.656							0.474763	28.4351	0.262376	25.6958	0.441034	30.8207	0.154735
0.63364	27.9488	0.836394	40.9809	0.239699	37.8546	0.230531	46.817	0.479397	29.8618	0.397859	41.1716	0.416462	45.8696	0.321069	36.7506	0.519602	33.3466						0.120326	110.312							0.20256	50.5275	0.171873	68.4866	0.193934	74.6871							0.289945	28.5184	0.221689	26.0019	0.236228	30.9809	0.202518
0.495973	28.7369	0.51403	40.9834	0.336846	37.8615	0.235249	47.6556	0.211877	30.1852	0.499262	41.6475	0.385663	46.4068	0.340527	37.0875	0.619989	33.6901						0.10413	111.81							0.117964	51.8442	0.133499	69.5956	0.228228	75.5869							0.289602	28.9652	0.252587	26.2097	0.337775	31.0592	0.295538
0.600148	28.8962	0.157005	41.086	0.433515	38.8267	0.245872	49.365	0.285864	30.656	0.482904	41.8467	0.176005	46.4994	0.439737	37.1061	0.726161	33.9417						0.110346	111.868							0.152702	52.036	0.161187	69.8858	0.127853	75.9899							0.551265	28.9803	0.23739	26.2617	0.478955	31.5778	0.144989
0.515383	28.9628	0.559876	41.138	0.441241	39.0016	0.305294	49.7207	0.318198	31.256	0.369008	42.0706	0.368391	47.098	0.333727	37.124	0.896309	33.9804						0.110152	112.373							0.159997	52.3309	0.192378	71.4795	0.171322	79.6056							0.421224	28.9892	0.167561	26.8588	0.373916	31.5841	0.184203
1.03418	29.0191	0.489185	41.5635	0.398281	39.1789	0.222374	50.3433	0.896802	31.7214	0.252834	43.154	0.429569	47.8328	0.437221	37.9797	0.700291	34.0204						0.111335	113.761							0.116353	53.6969	0.101435	71.5262	0.156612	80.2482							0.244826	29.2035	0.115389	27.7895	0.127796	31.5988	0.24497
0.268771	29.1245	0.248877	41.887	0.920316	39.2244	0.306374	51.2184	0.314465	31.7687	0.457583	43.4317	0.218184	48.6533	0.27927	38.3311	0.549585	34.3368						0.124617	113.819							0.166758	54.0117	0.147174	73.0032	0.172966	84.29							0.390801	29.7497	0.14217	28.0287	0.214493	31.6789	0.177097
0.439285	29.3873	0.881609	42.1635	0.321127	39.4684	0.284916	52.2301	0.300166	31.8457	0.462815	43.8012	0.193608	48.8922	0.244465	38.6699	0.586909	34.6011						0.121247	116.074							0.226361	54.0768	0.182826	73.4829	0.156804	92.7534							0.371065	29.9343	0.207635	28.6392	0.191061	31.8662	0.246715
0.525769	29.3946	0.316694	42.4282	0.472863	39.5427	0.232684	52.764	0.216494	32.5932	0.621112	45.1695	0.365053	49.075	0.124779	38.743	0.511453	35.103						0.102742	119.374							0.187004	56.2453	0.202423	73.7103	0.106622	102.492							0.47851	29.9474	0.200517	28.6963	0.22714	32.4637	0.107352
0.544027	30.0585	0.309458	42.5424	0.366974	39.6829	0.343978	52.8047	0.391705	32.7301	0.488975	45.455	0.321556	49.2592	0.337386	39.1897	0.654011	35.1612						0.213155	120.519							0.125423	57.0362	0.181334	76.0346	0.194933	108.78							0.258712	29.9984	0.191252	28.8209	0.323685	32.8402	0.201534
0.53888	30.5585	0.472288	42.6904	0.387071	39.9397	0.31928	53.5493	0.267937	32.9203	0.472702	45.5216	0.293608	49.472	0.402417	39.6915	0.639712	35.222						0.123271	122.289							0.104723	58.0511	0.21379	79.3731	0.103055	116.382							0.454633	30.0176	0.194388	29.5106	0.222889	32.9063	0.220674
0.926128	30.882	0.329269	42.7147	0.270008	40.0015	0.221563	54.1386	0.523743	32.9258	0.29317	45.5566	0.240146	49.8983	0.302445	40.0588	0.492367	35.3386						0.130678	122.746							0.117901	58.0755	0.176417	79.6135	0.110254	133.075							0.273775	30.0979	0.120761	29.6273	0.183418	33.1059	0.174666
0.636665	30.9371	0.87242	43.0689	0.345039	40.3203	0.10146	54.4321	0.127212	33.0356	0.579844	45.6971	0.21831	51.2335	0.337314	40.2662	0.511149	35.3889						0.107082	123.486							0.102665	58.2325	0.178406	80.2191	0.101907	134.097							0.367427	30.192	0.21146	29.762	0.258004	33.1114	0.179847
0.975017	31.1311	0.280695	43.1626	1.29003	40.4509	0.167015	57.2925	0.260238	33.2873	0.782471	46.1779	0.362732	51.3609	0.21626	40.4921	0.724436	35.3952						0.126822	126.233							0.266251	58.9683	0.102706	81.3004	0.126992	136.219							0.523704	30.2456	0.161028	29.9904	0.498216	33.9745	0.252889
1.14193	31.3094	0.748214	43.2032	0.52641	40.5187	0.228043	57.4365	0.20578	33.5095	0.154122	47.2486	0.139564	52.4494	0.240041	40.7541	0.397655	35.4941						0.138111	128.786							0.154297	59.2665	0.18342	81.8326									0.370415	30.73	0.226668	30.6343	0.400059	34.1909	0.182871
0.451373	31.623	0.706581	43.3644	0.204721	41.9106	0.317008	57.6518	0.311151	33.5099	0.517229	47.3001	0.256616	52.5571	0.344856	40.8757	0.338674	35.6561						0.133906	129.638							0.16363	60.6631	0.156826	85.4336									0.35048	30.9132	0.233115	30.7291	0.114952	34.3749	0.131845
0.532032	31.7308	0.735929	43.5499	0.189072	42.2358	0.208941	57.8754	0.327398	33.8463	0.347003	47.8619	0.212191	53.0284	0.374798	40.9051	0.697906	35.7837						0.134405	129.903							0.12912	61.084	0.116292	87.4143									0.679983	31.3089	0.236595	30.8632	0.235532	34.4161	0.104592
0.981814	32.1616	0.584605	43.7115	0.41851	42.5629	0.342363	58.2973	0.612997	33.9925	0.134378	48.0516	0.475335	53.2156	0.178251	40.922	0.671561	35.9791						0.103421	131.975							0.177855	61.093	0.139136	90.3834									0.232212	31.4822	0.145098	30.8994	0.501521	34.5109	0.253763
0.457667	32.2482	0.178491	43.7349	0.3052	43.1318	0.188534	60.308	0.234632	34.4551	0.718572	48.1014	0.310494	53.4649	0.172874	41.145	0.668543	36.0118						0.144879	132.975							0.133705	61.2755	0.182157	91.4414									0.382162	31.5912	0.137285	31.4186	0.112156	34.8967	0.174111
0.507661	32.2679	0.398067	44.6348	0.285965	44.4867	0.111388	61.0082	0.5862	34.6718	0.584426	48.4303	0.507801	53.5433	0.353257	41.2014	0.358418	36.2602						0.150748	134.813							0.112567	62.4083	0.124295	91.5858									0.196497	31.6342	0.202337	31.7967	0.316084	35.1899	0.312438
0.623673	32.5255	0.258148	44.7878	0.381238	44.8145	0.177477	62.0016	0.337012	34.8757	0.43688	48.4892	0.40837	54.1104	0.105213	41.5828	0.688979	36.3281						0.115006	135.626							0.198102	62.6049	0.121788	93.3915									0.324696	31.8265	0.153016	31.9418	0.313565	35.6025	0.185908
0.905252	32.7587	0.617958	44.8058	0.304301	45.2435	0.15532	62.5934	0.199571	34.8839	0.369783	48.6255	0.170722	54.327	0.331221	41.7623	0.703121	36.617						0.112897	136.852							0.175803	63.2404	0.129254	94.8158									0.249847	31.8591	0.19459	32.0887	0.279258	35.6204	0.234576
0.349385	32.7657	0.313192	44.8198	0.269589	45.6537	0.218216	62.9926	0.257859	34.9909	0.362157	50.1073	0.398685	54.4928	0.33352	41.9998	0.579205	37.1089						0.12943	137.271							0.165224	63.6314	0.177135	95.2657									0.589221	32.0787	0.276405	32.235	0.291775	35.7636	0.116259
0.437594	33.1481	0.398788	44.9573	0.513714	45.854	0.230995	63.6297	0.352958	35.7395	0.384953	50.1315	0.319128	55.9434	0.161118	43.087	0.37132	37.822						0.134226	138.096							0.153936	65.9693	0.132015	98.5894									0.254465	32.2492	0.211497	32.3761	0.280533	35.9391	0.134496
0.498313	33.1544	0.677126	45.4909	0.697134	46.5199	0.226729	64.6595	0.683262	35.8038	0.444028	50.7093	0.140541	56.1095	0.299134	43.338	0.47099	37.9598						0.135981	138.497							0.147549	66.7067	0.197348	99.294									0.526281	32.2647	0.299831	32.3844	0.371918	36.3005	0.171638
0.72169	33.6443	0.478703	45.7402	0.183352	46.7543	0.196127	64.8131	0.347829	36.2008	0.517309	50.848	0.140762	57.2229	0.199262	43.69	0.613567	38.1173						0.118749	139.597							0.189193	67.9106	0.127782	100.394									0.463185	32.489	0.216653	32.5367	0.292171	36.4185	0.16972
0.466702	33.7725	0.364419	45.9781	0.213024	46.8581	0.219022	65.1426	0.19533	36.5576	0.407038	51.0532	0.204181	57.3824	0.476945	43.7257	0.757268	38.376														0.323213	68.0516	0.148612	101.187									0.665175	32.751	0.350923	32.6493	0.326046	36.7535	0.199165
0.779887	34.5263	0.635091	45.9825	0.286006	47.196	0.247798	66.6271	0.254215	36.853	0.549991	51.4556	0.275303	57.391	0.297042	44.5071	0.313116	38.5228														0.158771	68.6156	0.149695	102.437									0.443572	32.9775	0.131067	33.0158	0.219757	36.8684	0.168558
0.3942	34.6571	0.25039	45.9888	0.254226	47.4767	0.163068	67.0198	0.381645	36.8532	0.465974	51.6103	0.182134	58.8375	0.224453	45.2954	0.667981	38.8088														0.116738	68.9936	0.138235	104.516									0.511413	33.249	0.134426	33.276	0.202762	36.9763	0.177222
0.415621	35.0479	0.559006	46.3923	0.384854	47.7981	0.181226	67.7797	0.37195	36.9732	0.385851	52.1649	0.172226	59.1013	0.261576	45.4109	0.279895	38.8967														0.1949	72.1468	0.147514	105.334									0.220857	33.8846	0.237898	33.3298	0.294143	37.2095	0.187489
0.625027	35.2149	0.50156	46.981	0.372205	48.1506	0.167488	67.8817	0.245763	37.0429	0.303322	52.9589	0.374241	59.2875	0.233863	45.5294	0.41738	39.35														0.170753	73.4265	0.173142	107.821									0.361297	33.9995	0.105406	33.6501	0.277365	37.2387	0.102224
1.03523	35.4249	0.646757	47.0301	0.158768	48.1824	0.107598	69.0459	0.288931	37.8266	0.247093	53.5954	0.254714	59.3058	0.350928	45.6257	0.554533	39.5304														0.135433	73.7216	0.108706	111.605									0.399197	34.0717	0.135585	34.1173	0.41388	37.2969	0.153278
0.25563	35.6984	0.559762	47.1512	0.367338	48.8384	0.169887	69.3912	0.29524	38.6123	0.364814	53.6459	0.311801	59.4551	0.366358	46.0541	0.20413	39.6492														0.231438	73.9412	0.200754	114.203									0.485648	34.0721	0.185407	34.1733	0.134269	37.4199	0.16464
0.857899	35.7173	0.70129	47.3025	0.163122	48.9497	0.182316	69.4633	0.270631	38.6882	0.769428	53.9823	0.283465	59.6687	0.316225	46.1399	0.481222	39.9607														0.151634	74.803	0.129	114.348									0.256274	34.1001	0.210271	34.2261	0.279913	37.6043	0.211486
0.642102	36.2672	0.212135	48.1083	0.551279	49.1655	0.181808	69.6911	0.579875	39.0703	0.555724	55.0347	0.285384	59.8895	0.31289	46.3695	0.640766	40.1005														0.167089	75.2506	0.172937	115.279									0.2272	34.4684	0.118926	34.2945	0.367745	37.6607	0.173032
0.366555	36.428	0.348055	48.2535	0.318679	49.1829	0.228548	71.756	0.194094	39.0924	0.364104	55.3057	0.386598	60.6609	0.318987	46.5432	0.401024	40.2111														0.210641	75.8026	0.107902	115.499									0.525957	34.4687	0.387592	34.3528	0.527926	37.8209	0.244939
0.506793	36.4318	0.38976	48.5412	0.267804	49.4933	0.117811	80.803	0.239255	39.4603	0.164414	55.7315	0.275099	60.6802	0.273817	46.6109	0.454364	40.2389														0.140249	76.6309	0.104931	118.902									0.522038	34.5145	0.281063	34.674	0.283584	37.8631	0.208618
0.315108	36.9034	0.410644	48.6498	0.192537	49.7173	0.191078	84.0485	0.1331	39.5215	0.345691	55.9232	0.252935	61.0627	0.197801	46.6672	0.491396	40.9015														0.19451	77.1707	0.102821	120.475									0.412685	34.5856	0.104308	34.8885	0.397318	37.9102	0.165871
0.389024	36.9783	0.516191	48.711	0.199273	51.0789	0.137513	84.8909	0.254321	39.7495	0.486265	56.4017	0.297138	62.3125	0.29853	46.7153	0.699013	41.0255														0.118751	77.9061	0.162315	121.033									0.367523	34.7443	0.193945	34.9792	0.16304	37.9998	0.250269
0.717112	37.1705	0.556996	49.0897	0.280001	51.2109	0.128196	85.0817	0.293068	40.1961	0.193063	56.6706	0.21602	62.779	0.23363	47.1476	0.477156	42.1408														0.129833	78.623	0.116692	125.169									0.150123	34.8081	0.196291	35.1225	0.18359	38.1532	0.238797
0.362381	37.3447	0.215872	49.213	0.243341	51.4529	0.107889	85.1817	0.284241	40.3057	0.400551	57.0971	0.284041	63.6531	0.20834	47.2296	0.349233	42.1592														0.175352	78.7533	0.141928	128.305									0.298435	35.4079	0.191312	35.3394	0.294593	38.9231	0.134147
0.446214	37.4112	0.509589	50.1175	0.182051	51.6419	0.154394	87.868	0.217548	40.3604	0.344446	57.3812	0.254761	63.9509	0.101355	47.5617	0.32378	42.293														0.216816	80.0455	0.223863	131.293									0.431036	35.5124	0.226772	35.4781	0.201092	38.9926	0.241875
1.34912	37.4418	0.480184	50.1866	0.165809	51.7077	0.12075	89.4642	0.325583	40.3989	0.491979	57.8479	0.433491	64.0348	0.288237	48.0986	0.365773	42.3775														0.164507	82.3335	0.173564	135.935									0.27871	35.6199	0.155353	35.5701	0.304339	39.2524	0.136858
0.363809	37.4649	0.402713	50.2733	0.165237	51.9212	0.119093	89.6579	0.104512	40.406	0.34057	57.8859	0.168368	64.2819	0.254696	48.3379	0.732283	42.5808														0.121201	82.6716	0.102478	136.814									0.495033	35.718	0.279092	36.0003	0.260473	39.2822	0.288034
0.421648	38.7324	0.24532	50.7044	0.331137	51.9797	0.118493	90.2102	0.520681	40.7083	0.462558	58.3001	0.110642	65.043	0.272526	48.6184	0.45909	42.6702														0.159291	85.9387											0.527528	35.8168	0.116856	36.1709	0.178808	39.36	0.127526
0.483487	39.0001	0.323864	50.8898	0.260756	52.1523	0.137681	90.8295	0.359387	40.8496	0.189156	59.1232	0.274087	65.0676	0.22144	49.68	0.16586	42.7093														0.122063	86.7544											0.32643	35.8948	0.21761	36.4433	0.482099	39.3967	0.189996
0.389518	39.3999	0.609768	50.9578	0.526461	52.3861	0.111279	95.6621	0.243165	41.0088	0.499189	59.7505	0.163435	65.3776	0.204902	49.8013	0.330538	43.4527														0.166014	87.0793											0.333692	36.4547	0.185959	36.9475	0.140832	39.7882	0.154781
0.299586	39.5247	0.804835	51.0324	0.355061	52.736	0.110038	96.0828	0.297763	41.1559	0.449911	59.9493	0.125992	65.9173	0.203504	49.8633	0.359645	43.4895														0.138636	88.1286											0.112678	36.5094	0.261091	37.3708	0.232658	40.3554	0.100085
0.68108	39.7607	0.710983	51.486	0.31468	52.9035	0.152976	97.3523	0.196731	41.1741	0.313385	60.069	0.185014	67.1814	0.236832	49.9464	0.80389	43.5184														0.141279	91.8647											0.32722	36.6345	0.214805	37.4689	0.145949	40.7265	0.211191
0.198774	40.1252	0.514829	52.0345	0.165249	54.9439	0.118243	114.143	0.323494	41.3554	0.398458	60.8034	0.302514	67.3133	0.323147	50.5062	0.48001	44.0795														0.245507	92.5644											0.232761	36.8121	0.164725	37.8856	0.268129	40.8674	0.184956
0.381925	40.258	0.769661	52.6103	0.261519	54.9842			0.355098	41.5806	0.119234	60.907	0.138219	68.1161	0.135506	50.6656	0.555348	44.256														0.141518	95.223											0.250352	37.5987	0.179088	38.0949	0.32327	41.517	0.156832
0.45481	40.3751	0.381327	52.7875	0.112822	55.237			0.302646	42.0947	0.310834	61.7361	0.101845	68.3619	0.295614	50.9314	0.56659	44.2592														0.173423	97.0384											0.377543	37.6252	0.218615	38.1325	0.238457	41.5459	0.117095
0.68592	40.4082	0.428777	52.9502	0.342059	55.7825			0.257461	42.6216	0.100196	61.8341	0.203775	69.1658	0.206485	51.1801	0.559863	44.3173														0.138569	97.7732											0.347933	37.6861	0.137258	39.2384	0.356836	42.1591	0.155373
0.478635	40.4484	0.533619	53.3036	0.246194	56.8028			0.274566	42.7584	0.213543	62.2542	0.155332	71.2985	0.252834	51.2176	0.451679	44.386														0.102589	103.152											0.29715	37.713	0.109131	39.4423	0.211565	42.1726	0.134725
0.369019	40.687	0.211919	53.3917	0.264939	57.3381			0.235129	42.9823	0.312617	62.2868	0.127085	71.9013	0.281512	51.2996	0.149536	44.4288														0.145259	104.261											0.280708	38.2602	0.420315	39.4558	0.229257	42.6122	0.15115
0.449939	40.9768	0.148707	53.4204	0.283915	57.3676			0.175723	43.073	0.396221	62.3401	0.187129	72.2186	0.292084	51.4034	0.454178	44.6226														0.165665	108.046											0.229221	38.3799	0.141491	39.7201	0.298643	43.1529	0.138729
0.349867	41.0367	0.913832	54.2263	0.154983	57.4439			0.185318	44.7361	0.344619	62.9459	0.135792	74.4555	0.207166	51.4561	0.808888	44.7317														0.110124	108.901											0.3123	38.6313	0.342827	40.3711	0.304682	43.5248	0.198486
0.591103	41.5344	0.63545	54.3538	0.100816	57.8445			0.196787	44.948	0.377589	63.5289	0.216684	75.0814	0.149656	51.757	0.233634	44.749														0.124145	110.24											0.28645	38.9611	0.131	41.0361	0.237738	43.6227	0.206315
0.106791	41.5669	0.462535	54.9861	0.314133	57.8659			0.457591	45.2072	0.321988	63.807	0.222986	75.1398	0.226655	51.9338	1.01588	44.8889														0.107653	111.214											0.379296	39.3259	0.118721	42.0627	0.277727	43.6509	0.198275
0.320909	42.1232	0.377758	55.0897	0.167974	57.963			0.230341	45.9455	0.145046	63.8874	0.263873	75.8499	0.234661	52.9081	0.608018	45.5129														0.104395	129.119											0.140805	39.4582	0.154711	42.2817	0.211158	44.6974	0.150663
0.489123	42.2487	0.282041	55.3984	0.322327	58.7639			0.11873	45.9552	0.337895	64.9993	0.157908	75.9042	0.154059	53.2127	0.49327	45.5822																										0.287199	39.8355	0.132356	42.2853	0.241607	45.7176	0.155773
0.395481	42.4612	0.282323	55.6166	0.199191	59.2294			0.126389	46.3753	0.316878	65.1883	0.229551	76.1957	0.10583	53.2237	0.447298	46.7013																										0.333291	40.11	0.131709	42.2958	0.227315	46.401	0.115734
0.411576	42.7802	0.40509	55.8298	0.287433	59.5006			0.270878	47.0508	0.243241	65.852	0.153485	76.4849	0.233823	53.4084	0.425856	47.05																										0.290281	40.5017	0.173967	42.9201	0.220328	46.676	0.132094
0.280081	42.9221	0.381228	55.9319	0.222696	59.6637			0.232495	47.4167	0.283603	66.5848	0.139191	77.202	0.278243	53.7076	0.373345	47.085																										0.340787	40.504	0.120382	43.1868	0.443057	46.8726	0.155658
0.510306	42.9342	0.382765	55.9686	0.156324	59.8812			0.13579	47.7511	0.194285	69.4632	0.183711	79.0001	0.26509	53.7975	0.197079	47.2256																										0.346776	41.3755	0.139592	43.2573	0.155504	47.1576	0.125575
0.341734	43.182	0.415012	55.9824	0.244746	60.4762			0.348582	47.7602	0.368049	69.8961	0.213712	80.1544	0.315752	53.8416	0.197508	47.4456																										0.28501	41.5253	0.123276	43.6028	0.252624	47.6786	0.159474
0.520376	43.2256	0.387155	56.1224	0.28208	61.4129			0.316069	48.6974	0.385792	70.1218	0.174903	81.9475	0.218722	53.8899	0.347097	47.7023																										0.373155	41.552	0.244435	43.7285	0.275834	47.8211	0.110888
0.626601	43.4071	0.475019	56.2123	0.160739	62.4925			0.32521	48.7086	0.319751	70.3676	0.103053	82.0853	0.125468	55.0353	0.459515	47.8244																										0.198438	42.0719	0.142178	44.107	0.36048	48.2713	0.165804
0.362259	43.7768	0.453989	56.6138	0.214206	63.2875			0.178453	48.922	0.131664	70.4358	0.281673	82.3208	0.315655	55.0978	0.455937	48.3985																										0.503198	42.1142	0.166124	44.1705	0.256265	48.3579	0.152276
0.302519	43.9159	0.700011	57.6155	0.19708	63.5066			0.132018	48.9467	0.393528	70.8292	0.141052	82.7138	0.336526	55.2528	0.400655	48.5396																										0.382222	42.557	0.145433	44.2731	0.231853	48.4608	0.144008
0.420428	44.0995	0.116276	58.1178	0.256484	64.3731			0.163009	49.5771	0.245032	71.465	0.168125	85.3221	0.257945	55.5033	0.328008	48.9391																										0.16028	42.9923	0.16908	44.8004	0.139367	48.8769	0.137105
0.435514	44.1515	0.438753	58.3364	0.204048	64.4754			0.209094	49.936	0.358208	71.6166	0.103121	85.4099	0.239593	56.4131	0.527065	49.2727																										0.394269	43.0341	0.192653	44.9867	0.108793	49.3179	0.107695
0.375906	44.1875	0.183033	58.5755	0.168784	66.036			0.100273	50.0557	0.183701	72.3659	0.218556	85.6047	0.287616	56.591	0.461713	49.3348																										0.288333	43.1449	0.171468	45.442	0.293622	49.3663	0.174333
0.345009	44.2194	0.403679	58.9508	0.207316	67.3908			0.221697	50.6469	0.337513	72.6394	0.190089	85.7723	0.224097	56.7715	0.361273	49.4545																										0.379161	43.4496	0.136842	45.447	0.23932	49.49	0.115255
0.321794	44.2554	0.573224	59.0404	0.188991	68.4466			0.143164	50.8569	0.179936	73.3325	0.132836	85.9207	0.211523	57.2548	0.60179	50.0761																										0.199451	43.5019	0.149649	46.1163	0.31605	49.5494	0.142693
0.303524	44.3872	0.261549	59.5011	0.26321	68.6542			0.181726	51.516	0.158257	73.7007	0.152564	86.3414	0.120551	58.3224	0.402685	50.3579																										0.28469	43.6308	0.109762	46.8492	0.464681	49.9569	0.102369
0.356468	44.4769	0.495208	61.0593	0.260248	68.8174			0.21375	51.8298	0.107248	73.9221	0.170598	87.951	0.164562	58.7946	0.469641	50.9625																										0.24583	43.8424	0.127724	47.2611	0.135011	49.9632	0.161825
0.557307	44.8051	0.232515	61.1126	0.199262	70.7179			0.109352	52.9577	0.347181	74.8117	0.222323	89.1617	0.191762	58.8547	0.25651	51.085																										0.233402	44.2984	0.109305	47.645	0.114128	50.1587	0.162209
0.337773	44.9373	0.315023	61.3536	0.135991	72.3782			0.241666	53.5303	0.273094	75.3614	0.145774	89.5057	0.16008	59.1693	0.347043	51.4668																										0.516638	44.4283	0.202004	48.7455	0.311887	50.1839	0.112417
0.373356	45.7691	0.11184	62.6243	0.185731	73.9797			0.187014	54.1211	0.160378	75.5014	0.174105	89.6634	0.26263	59.2494	0.106456	51.4824																										0.177408	44.6895	0.19051	49.4425	0.250754	50.8359	0.139626
0.257402	46.1756	0.218771	63.0122	0.105233	74.4197			0.146517	54.1398	0.257303	75.7784	0.250935	91.2603	0.323093	59.6041	0.38906	51.6263																										0.354197	45.046	0.192902	49.8376	0.155006	50.8836	0.127025
0.479314	46.5379	0.264871	63.3295	0.192346	76.1157			0.240311	54.4109	0.373684	75.8939	0.156133	94.1597	0.103553	59.7383	0.497225	51.6444																										0.334762	45.1521	0.121037	50.805	0.281906	50.9902	0.131971
0.370494	46.57	0.510847	63.5002	0.246493	76.3512			0.25847	54.9097	0.292925	77.7185	0.14916	95.3088	0.122943	59.837	0.279032	51.7624																										0.43811	45.2164	0.347741	52.9363	0.311083	51.4137	0.102543
0.403855	46.6062	0.307523	63.6317	0.166358	77.3416			0.246958	55.2721	0.172185	79.8162	0.12358	96.1812	0.254701	60.6055	0.287344	52.4633																										0.570421	45.288	0.178797	54.0738	0.223533	51.6179	0.162151
0.452348	47.2525	0.212407	63.8318	0.194771	78.0343			0.261367	55.8609	0.275264	80.1994	0.120333	99.5018	0.207726	60.7153	0.320527	53.64																										0.25076	45.3701	0.171548	54.3403	0.1755	52.5056	0.124875
0.303335	47.2845	0.529774	64.3139	0.111836	78.3337			0.190511	56.1106	0.210171	80.4243	0.12153	100.067	0.173101	61.2394	0.363564	53.6922																										0.191405	45.4376	0.11342	54.5473	0.120831	52.5929	0.11932
0.389425	47.6342	0.626652	64.8877	0.204661	79.323			0.185762	57.2868	0.170319	80.8353	0.118495	100.25	0.157083	61.6804	0.436751	54.2433																										0.174759	45.7808	0.16828	54.8621	0.184548	52.985	0.111272
0.31152	47.7728	0.275017	65.8344	0.151567	79.5631			0.199387	57.7962	0.225101	80.8486	0.112972	102.005	0.28602	61.809	0.465048	54.441																										0.226692	46.2525	0.182991	55.2305	0.371651	53.0241	0.134211
0.309091	47.8692	0.32609	66.2885	0.104727	79.8882			0.137552	58.7494	0.249278	81.242	0.153007	103.383	0.214696	61.8657	0.377754	55.2307																										0.239126	46.8016	0.121023	55.6001	0.208238	53.05	0.112135
0.381203	48.4155	0.258621	66.3437	0.165324	80.2618			0.305423	59.3786	0.278837	81.2546	0.103048	103.479	0.228692	62.0272	0.210654	55.2709																										0.295225	46.8524	0.171162	56.3555	0.204686	53.3018	0.163991
0.326102	48.575	0.182229	66.3914	0.186326	80.934			0.193831	59.4876	0.217051	83.4376	0.134491	103.608	0.226232	62.2633	0.280211	55.4154																										0.26864	46.9183	0.130446	57.9419	0.174186	53.463	0.141581
0.315876	48.6727	0.548235	66.4913	0.209197	82.6303			0.195973	59.55	0.185704	83.8017	0.161777	104.442	0.174002	62.3427	0.492957	55.5339																										0.305578	46.9982	0.107565	58.6272	0.269659	54.5783	0.105249
0.342264	49.1129	0.276088	66.6417	0.112484	84.4889			0.209002	60.4967	0.104393	84.2667	0.100137	104.916	0.106789	62.4919	0.412542	55.6676																										0.218041	47.2398	0.100857	59.9814	0.122577	54.6287	0.102006
0.436097	49.1487	0.255201	66.866	0.165483	85.9568			0.114104	60.6831	0.355207	84.4581	0.113151	105.663	0.104465	63.2189	0.241602	56.2374																										0.203668	47.3734	0.113693	60.8966	0.244715	54.7603	0.16069
0.275421	49.2427	0.361361	66.937	0.199651	86.2232			0.127028	60.7562	0.315461	85.9112	0.145759	110.209	0.161175	63.4383	0.325287	56.393																										0.27951	47.7327	0.10663	61.0975	0.219381	55.0835	0.102094
0.291388	49.5472	0.276721	67.0633	0.193878	88.0509			0.215109	62.0344	0.16018	87.5277	0.163973	110.691	0.17862	63.6887	0.148658	56.4583																										0.463827	47.9301	0.10937	63.29	0.199267	55.6293	0.112889
0.374618	50.5296	0.385514	67.6246	0.154738	88.1451			0.286704	62.0649	0.165565	87.6552	0.111933	112.8	0.141896	63.9569	0.458658	56.6065																										0.206005	48.1147	0.112852	63.4694	0.242097	56.2797	0.132179
0.317284	50.5931	0.317807	68.5055	0.187399	90.8606			0.271216	63.4943	0.193871	88.6314	0.104875	112.969	0.113257	64.4192	0.366116	56.9013																										0.3041	48.2879	0.127487	64.0721	0.142535	56.5913	0.10942
0.229584	50.7097	0.360699	68.5086	0.140838	91.1063			0.206878	64.1062	0.179722	89.0646	0.132551	117.435	0.171856	64.4789	0.27517	57.0547																										0.319753	48.353	0.124111	64.798	0.10834	56.655	0.113227
0.101447	50.8637	0.319559	68.7478	0.143527	93.9481			0.256844	64.2107	0.16243	89.5835	0.149082	118.68	0.21989	65.3166	0.425301	57.2198																										0.279211	48.4721	0.105903	65.0862	0.202234	56.7452	0.105881
0.16104	50.9566	0.249597	68.9082	0.135476	95.4096			0.162431	65.211	0.200759	89.8834	0.109117	121.988	0.169786	66.7064	0.357221	59.2584																										0.349473	48.6589	0.151449	65.1163	0.163888	56.775	0.105581
0.241728	51.0304	0.248932	69.2287	0.105967	95.5323			0.131016	66.0382	0.330003	90.9399	0.1227	126.054	0.149947	66.8299	0.241685	59.7871																										0.114196	49.23	0.115164	65.3194	0.158367	56.8277	0.136772
0.281428	51.0485	0.162088	69.2597	0.110916	95.8038			0.185571	66.3819	0.322293	91.9894	0.109968	126.623	0.100181	66.8907	0.391161	60.0789																										0.151	49.2389	0.124387	66.3917	0.137173	56.9556	0.123607
0.192257	51.1218	0.488151	70.1207	0.112131	97.2073			0.210369	67.6971	0.227826	93.1154	0.127908	127.141	0.131094	67.055	0.202542	60.3793																										0.276998	49.2473	0.101066	66.4826	0.223263	57.3449
0.321084	51.5248	0.263656	70.304	0.209174	98.7421			0.215234	67.8644	0.302941	93.703			0.2243	67.4196	0.293671	60.671																										0.42296	50.5195	0.131643	66.6775	0.184916	57.9613
0.288945	52.8264	0.189764	70.3566	0.107063	104.246			0.149321	68.6429	0.19074	93.9076			0.154245	67.6641	0.105029	60.8316																										0.178038	50.5645	0.121722	69.109	0.109905	57.9718
0.291613	52.9504	0.299895	70.724	0.144318	105.498			0.114342	69.3758	0.205656	95.8952			0.162236	67.7112	0.302455	61.1343																										0.241185	50.5712	0.161555	69.3743	0.100812	58.2938
0.325737	53.2377	0.510252	70.8484	0.159967	106.273			0.142481	71.5836	0.253105	96.7247			0.132568	67.7556	0.312536	61.4756																										0.300078	51.2669	0.145457	69.5265	0.166786	58.4658
0.369095	53.3315	0.215797	70.933	0.107884	111.493			0.128908	73.9055	0.207601	97.1698			0.137551	68.109	0.275383	61.8484																										0.223545	51.635	0.113047	69.7551	0.457573	58.5244
0.343681	53.561	0.383635	71.5051	0.11716	119.097			0.194153	74.2107	0.215931	97.4187			0.192001	68.7164	0.297842	62.3765																										0.196474	52.1193	0.142694	72.8088	0.354204	58.8799
0.309928	53.6168	0.184573	71.8093					0.146877	76.5044	0.135441	98.9217			0.186088	69.2389	0.240821	62.7476																										0.145222	52.3779	0.113866	73.5864	0.156385	59.0132
0.179749	53.8781	0.370555	72.2331					0.196092	77.1029	0.270028	101.23			0.165675	69.2994	0.316963	63.1137																										0.165702	52.6199	0.100065	74.1116	0.183649	59.8034
0.269662	54.5757	0.125703	73.9489					0.126933	77.6986	0.258533	103.117			0.191309	69.3244	0.344795	64.0324																										0.220989	52.8549	0.119758	76.1328	0.206126	60.6968
0.323474	54.986	0.307295	74.2264					0.24967	77.7569	0.226341	103.144			0.210885	69.3256	0.351448	64.4931																										0.116329	53.1508	0.124068	77.577	0.236774	61.1814
0.250653	55.3614	0.316304	74.7842					0.18921	78.8841	0.166142	104.747			0.183193	69.5028	0.206645	64.554																										0.403067	53.1842	0.118308	79.4397	0.190565	61.4071
0.295991	55.5091	0.315682	74.9511					0.127191	80.414	0.163359	111.011			0.192084	70.0027	0.23556	65.0034																										0.211863	54.0384	0.100154	83.5734	0.171642	61.5691
0.162344	56.0454	0.289429	75.2863					0.110499	80.9302	0.146573	111.59			0.202558	70.0153	0.263449	65.0978																										0.11351	54.355	0.114404	89.0169	0.122028	61.835
0.242828	56.177	0.254353	75.6553					0.104521	81.1762	0.231157	113.566			0.178377	70.0492	0.235905	66.2051																										0.136885	54.6927	0.106132	103.074	0.217009	61.9812
0.304789	56.2994	0.287487	76.2101					0.172336	81.7095	0.156298	114.859			0.113813	70.0574	0.238932	66.9001																										0.200691	54.944	0.106211	108.232	0.19072	62.6693
0.216188	56.3138	0.155324	76.5296					0.153646	82.6763	0.150119	115.956			0.164683	71.5694	0.309862	66.91																										0.311848	55.3747	0.111056	111.309	0.212801	62.8944
0.327899	56.4504	0.154742	77.2812					0.115203	84.0758	0.141957	129.462			0.170226	71.9054	0.406023	67.0322																										0.202288	55.3892			0.231302	63.0158
0.302512	56.8227	0.219787	78.2756					0.112368	84.2352	0.105214	129.687			0.128249	72.8406	0.2867	67.1915																										0.225338	55.4419			0.124425	63.4024
0.101093	56.987	0.169579	78.5369					0.151495	89.1075	0.105284	130.345			0.236928	73.2175	0.316405	67.3562																										0.233751	55.6051			0.127575	63.9806
0.239424	57.1157	0.113434	78.7973					0.1387	89.6214	0.137043	130.721			0.131299	73.693	0.191377	67.4316																										0.195834	55.6087			0.140863	64.3258
0.246348	57.1684	0.316734	78.8025					0.131705	90.5828	0.122491	130.949			0.196527	74.1672	0.132967	68.033																										0.22001	55.6785			0.123092	64.4672
0.260621	57.7006	0.175676	78.8988					0.13202	93.4578					0.133324	74.8006	0.224308	69.2562																										0.248394	56.081			0.34661	64.9277
0.305987	58.0817	0.139273	78.9251					0.126689	95.2279					0.127535	75.1528	0.261539	69.5662																										0.239598	56.2034			0.196315	65.5663
0.11465	58.4393	0.231057	79.8901					0.128757	95.2833					0.142653	75.2788	0.308101	70.0616																										0.133369	56.2993			0.210288	66.5281
0.338419	58.4782	0.406194	80.7349					0.112323	98.025					0.176374	75.9338	0.360562	70.5062																										0.208792	56.4588			0.117829	66.7113
0.174374	58.551	0.313861	82.2874					0.116943	99.8565					0.111242	76.0777	0.503208	70.8431																										0.218487	56.5138			0.134858	67.804
0.286982	58.6429	0.262314	86.2843					0.109205	100.873					0.111859	76.3614	0.10432	71.1257																										0.269745	56.7747			0.160164	68.452
0.152142	58.9445	0.243482	86.6667					0.126208	108.367					0.148906	76.5417	0.157671	71.147																										0.236742	57.0372			0.152287	68.7005
0.154799	59.35	0.217787	87.44					0.102526	110.985					0.131476	76.6899	0.129253	71.8757																										0.193831	57.1214			0.115746	69.2201
0.113802	59.4883	0.321165	87.6789					0.100515	112.238					0.169889	76.9323	0.189745	72.0822																										0.177605	57.128			0.173532	69.268
0.213017	59.509	0.25765	89.0061					0.100274	116.159					0.139852	77.5674	0.232142	72.8487																										0.216008	57.4675			0.197425	70.9833
0.236193	59.6605	0.260877	89.3409											0.172639	77.8575	0.349094	73.2888																										0.254975	58.1163			0.129132	71.6169
0.19098	60.027	0.385592	91.0014											0.105655	78.3399	0.263755	73.6689																										0.365041	58.2006			0.148142	72.1095
0.18104	60.2462	0.140098	91.3299											0.111151	79.1959	0.189339	73.6872																										0.174879	58.2732			0.187876	72.2781
0.360519	60.7056	0.261181	91.4909											0.206582	80.4744	0.190175	73.9665																										0.123443	59.1627			0.108267	72.8919
0.31619	60.8671	0.122881	91.5035											0.116069	81.7515	0.311942	74.0696																										0.213302	59.5188			0.116533	74.4121
0.320893	61.0743	0.191371	92.2171											0.103972	81.7762	0.104788	74.0702																										0.16252	59.5651			0.163226	74.7777
0.188	61.1963	0.199646	92.867											0.165374	83.6722	0.240235	74.6528																										0.180614	59.5761			0.110754	74.9295
0.219733	61.9591	0.169643	93.0325											0.127378	83.9234	0.117	74.9995																										0.184481	59.5901			0.186615	74.953
0.112884	62.1415	0.174668	93.6332											0.128816	83.9975	0.181105	76.3106																										0.126747	59.7907			0.154945	75.9405
0.170809	62.3411	0.314256	96.1153											0.19018	84.9402	0.209699	76.7641																										0.334941	60.3882			0.135211	76.1228
0.248427	62.7057	0.122578	96.1539											0.114406	85.807	0.181061	76.9378																										0.162396	60.8723			0.125024	76.8355
0.145972	62.777	0.129323	96.2805											0.165934	87.873	0.147673	79.1053																										0.130289	60.8817			0.192069	77.9286
0.183644	63.0393	0.163738	97.1024											0.127028	88.067	0.396812	80.0386																										0.14218	61.5079			0.156526	81.8225
0.343229	63.1534	0.150556	97.8999											0.149688	88.6488	0.153445	80.4359																										0.211889	61.5222			0.111	82.1265
0.149687	63.2962	0.31107	98.2682											0.113272	89.8518	0.210957	80.6934																										0.156348	61.6467			0.119848	82.1317
0.262832	64.863	0.141043	99.8046											0.144802	90.0989	0.226646	80.8344																										0.194927	62.0097			0.123792	82.65
0.257762	66.0131	0.127566	100.334											0.139739	91.3894	0.130563	81.7667																										0.142376	62.3113			0.127356	83.8176
0.267539	66.0136	0.185949	100.375											0.114779	92.0537	0.229391	81.8027																										0.141348	62.6288			0.115036	84.2426
0.182587	66.1546	0.164363	102.388											0.118836	93.4546	0.194633	82.785																										0.223569	62.682			0.112191	84.4774
0.199623	66.5731	0.173294	103.667											0.13856	95.5554	0.140573	84.3242																										0.191715	63.1388			0.170563	84.7791
0.150241	66.9743	0.202789	106.454											0.10213	98.549	0.137587	84.6919																										0.14133	63.363			0.171641	88.4925
0.228384	67.1069	0.17967	106.589											0.218425	101.923	0.198621	86.7107																										0.183838	63.9381			0.120743	88.8657
0.337406	67.2437	0.109993	106.65											0.154199	102.39	0.169176	87.349																										0.105358	65.5137			0.103978	89.0013
0.176253	67.3758	0.219373	108.024											0.113748	103.507	0.251403	87.9005																										0.187111	65.8171			0.128897	90.6798
0.228221	67.8691	0.165295	110.588											0.113227	108.819	0.165504	87.9786																										0.139891	65.8717			0.180351	92.0004
0.22989	68.093	0.240423	111.127											0.104392	111.1	0.220676	88.3655																										0.174364	66.5742			0.15297	92.751
0.236574	68.2668	0.140254	113.682											0.122679	116.742	0.128392	89.8259																										0.19924	68.8099			0.121829	94.0463
0.150829	68.2725	0.160823	116.022											0.146781	120.005	0.294944	89.9734																										0.171461	69.095			0.134897	94.6266
0.276858	68.6076	0.125769	121.958											0.100701	124.091	0.161182	90.0046																										0.194978	69.1446			0.110442	96.8436
0.288262	68.9942	0.13156	126.322											0.10252	131.271	0.100397	90.1428																										0.107381	70.2841			0.147659	99.2183
0.223239	69.1487	0.124981	128.786													0.187539	90.5407																										0.159169	70.5165			0.13904	100.46
0.141247	69.1904	0.11513	135.619													0.170683	91.142																										0.200873	71.5958			0.163925	101.655
0.226922	69.3191															0.167135	91.5233																										0.201496	71.6039			0.11585	101.676
0.197154	69.5542															0.261018	92.0295																										0.193048	71.6328			0.120378	102.74
0.198181	69.921															0.137386	94.8785																										0.109652	71.927			0.152566	105.75
0.219808	70.1946															0.100998	95.2716																										0.176772	71.9592			0.102579	107.637
0.106955	70.6853															0.241226	95.7402																										0.150641	72.3538			0.130327	115.143
0.192025	70.7575															0.165445	97.4334																										0.15839	72.3974			0.139976	119.891
0.166201	71.4753															0.238182	98.3173																										0.159564	73.0311			0.100031	123.514
0.156413	72.2696															0.12992	98.4419																										0.10743	73.1635			0.134844	130.91
0.125557	72.7405															0.197435	98.5538																										0.133895	73.2362
0.130136	73.8047															0.212084	99.3569																										0.179796	73.3707
0.164752	73.9513															0.118805	101.609																										0.105572	73.5052
0.227751	74.2185															0.121228	102.276																										0.1959	73.5649
0.188549	74.8629															0.180538	103.413																										0.12217	74.4234
0.210911	75.177															0.185533	103.857																										0.28213	75.1797
0.139201	75.4738															0.134721	104.915																										0.178716	75.4818
0.174408	75.5111															0.198911	104.952																										0.198636	78.2523
0.212705	75.5443															0.223343	105.753																										0.141708	78.7745
0.293404	75.5943															0.155975	106.762																										0.183505	80.7991
0.11796	76.5079															0.145001	108.348																										0.128308	80.9391
0.147018	76.8925															0.168834	108.408																										0.109156	82.6666
0.182748	78.1393															0.116542	110.273																										0.141191	83.272
0.118813	78.2786															0.159825	110.341																										0.116429	83.8921
0.140235	78.3917															0.164816	111.678																										0.145201	84.0578
0.269257	78.783															0.195679	112.942																										0.123166	84.7624
0.178451	81.1901															0.103792	114.17																										0.132209	87.2658
0.244155	81.4876															0.127906	114.236																										0.114701	87.9351
0.12058	81.785															0.104068	115.905																										0.119055	88.6904
0.198428	82.4714															0.11583	118.292																										0.119984	91.6556
0.129877	83.0538															0.100472	119.27																										0.118552	93.0597
0.211869	83.0574															0.103325	119.488																										0.107557	94.269
0.111491	83.5019															0.164493	120.125																										0.106223	95.032
0.202852	83.7147															0.151354	120.746																										0.106355	95.1461
0.141493	84.1269															0.11013	121.192																										0.105969	96.1154
0.194795	84.4657															0.15587	123.651																										0.113125	97.0637
0.157388	84.4726															0.121362	123.673																										0.126937	100.897
0.106174	84.567															0.158345	124.196																										0.114176	103.889
0.148053	85.5409															0.109105	125.663																										0.118348	105.72
0.150952	86.1637															0.106132	125.936																										0.12751	106.181
0.344343	86.2393															0.137144	126.72																										0.103056	108.13
0.106769	86.7632															0.151211	127.284																										0.131205	109.563
0.210644	88.8443															0.153887	131.118																										0.107945	109.826
0.158115	89.2439															0.102413	139.769																										0.101616	110.841
0.170824	92.0504															0.100518	140.047																										0.150851	117.805
0.162011	92.6976															0.102819	141.501																										0.112962	132.201
0.16259	93.4355
0.125957	93.6469
0.122248	94.9737
0.189598	95.1824
0.151273	95.2335
0.140883	97.198
0.117835	97.4054
0.155793	101.537
0.103475	101.732
0.134961	101.92
0.106883	103.045
0.131088	103.174
0.132867	105.861
0.138857	105.928
0.158854	107.862
0.186704	107.967
0.172143	108.678
0.140545	110.302
0.153545	110.315
0.106713	111.751
0.137214	112.15
0.130091	112.269
0.136828	112.833
0.134999	115.216
0.115463	121.317
0.12716	121.85
0.139082	122.521
0.106822	129.869
0.118759	133.627
[truncated: 33 more columns]
