# Supplementary material for: Zebrafish embryonic explants undergo genetically encoded self-assembly
Source: eLife. 2020 Apr 6;9:e55190. doi: 10.7554/eLife.55190 (PMC7190352; doi:10.7554/eLife.55190)
Supplement: Figure 6—figure supplement 1—source data 1. [file elife-55190-fig6-figsupp1-data1.xlsx]

## Sheet: Sheet1
Figure 6 - Supplement 1
C. Percentage of control MO and 1/5x sqt + cyc MO YSL-injected embryos showing normal, strongly reduced or no expression of sox32
						in %
	Present	Strongly reduced	Absent	Total		Present	Strongly reduced	Absent	Total
Control MO YSL injected	30	2	1	33		90.9091	6.06061	3.0303	100
1/5x sqt + cyc MO YSL-injected	2	25	3	30		6.66667	83.3333	10	100
