# Supplementary material for: Zebrafish embryonic explants undergo genetically encoded self-assembly
Source: eLife. 2020 Apr 6;9:e55190. doi: 10.7554/eLife.55190 (PMC7190352; doi:10.7554/eLife.55190)
Supplement: Figure 6—source data 1. [file elife-55190-fig6-data1.xlsx]

## Sheet: Sheet1
Figure 6
B. Percentage of YSL-injected embryos where hgg is present or absent
	hgg				in %
	Present	Absent	Total		Present	Absent	Total
Control MO	52	0	52		100	0	100
1/2x sqt + cyc MO	14	45	59		23.7288	76.2712	100
1/5x sqt + cyc MO	37	10	47		78.7234	21.2766	100
C. Ppl area
Control MO	1/2x sqt + cyc MO	1/5x sqt + cyc MO	Uninjected	Explant
12832.6	698.532	7743.38	12354	2770.16
11879.2	2085.68	9359.64	11642.2	2220.16
17809.2	2903.26	11218.1	9259.07	8544.53
13332.3	2737.6	7440.93	14129.9	2002.21
16373.9	762.762	4768.43	22917.9	24319.5
16646.8	1650.73	2028.59	19752.8	962.302
10654.5	3081.19	2657.07	18415.8	2693.99
19763.4	1892.41	6714.81	16210.4	8591.19
15493.3	1616.13	2224.24	27539.6	5849.16
14226.4	2354.2	2469.51	13713.8	7805.86
13671.8	1457.3	6910.78	33808.7	719.178
14699.6	3073.63	859.623	21678	1963.86
11627.9	2082.78	3469.75	21525.6	2890.88
12949.9	2372.99	6839.71	20382.6	1440.65
14595.7		8629.89	14636	3315.38
16788.4		5619.3	19187.5	1756.6
12170.1		3170.48	13149.3	4808.34
11391.6		7175.92	11617.5	11804.2
18148.3		17609.1	13065.1	12201
14275.5		7113.03	17797.2	2456.72
17055.8		8383.34	10453.8
17012		6203.99	14482.8
16811.2		2754.47	20911.6
19418.7		6011.18	17248
14955		4965.65	17747.3
12153.3		2434.31	16567.3
16290.3		2722.98	17471.4
13638.4		2175.96	13145.3
14710.9		2951.4	16102.3
14909.4		976.187	17317.6
14540.2		2928.56	19690
11284.3		3527.46
14134		2496.17
17458.6		7054.28
17487		3561.1
15473.2		1407.53
9740.79		3325.8
14588.3
13665.6
16645.6
11902
13212
18492
12225.6
8925.42
18820
14560.4
14504.1
11309.1
18958.3
12534
10342.3
E. Percentage of pSmad2/3 positive nuclei
50% epiboly
Dorsal		Lateral
Control MO	1/5x sqt + cyc MO	Control MO	1/5x sqt + cyc MO
68.1553	40.3846	65.1685	63.6364
66.7851	54.0146	65.4762	34.0796
67.6983	59.874	66.4634	54.1667
50.1333	52.3077	59.3985	55.1724
53.3623	48.0712	58.5542	59.6091
42.2908	12.9817	74.4409	46.6387
73.4807	3.90805	56.2334	36.1702
68.3333	50.4399	48.8372
59.0234		62.9921
71.7949
54.4615
F. Normalized intensity of brightest pSmad2/3 nuclei
50% epiboly
Dorsal																						Lateral
Control MO												1/5x sqt + cyc MO										Control MO										1/5x sqt + cyc MO
1.85543	1.49806	1.85174	1.37532	1.0642	0.79274	1.91328	2.03999	1.76606	2.63922	0.889252		0.576464	0.669186	1.6574	0.578498	0.537447	0.19843	0.18449	0.654942			2.04177	1.57488	1.34279	1.51154	1.34497	2.93341	1.65836	1.00741	1.25568		1.62069	0.350776	0.746816	0.76744	0.808798	0.657039	0.411539
1.47023	1.43049	1.4666	1.17722	0.974632	0.725446	1.73618	1.9679	1.67602	2.39811	0.863349		0.544759	0.634937	1.5281	0.534213	0.477026	0.185092	0.152924	0.613934			1.71472	1.4935	1.29003	1.40342	1.2621	2.84521	1.62333	0.960604	1.24123		1.47806	0.315584	0.707841	0.687461	0.796195	0.617639	0.403473
1.32908	1.3058	1.32238	1.09709	0.97229	0.722371	1.72606	1.79662	1.60796	2.18747	0.783864		0.53515	0.613752	1.50073	0.522661	0.475894	0.176234	0.139268	0.603195			1.66669	1.40282	1.24121	1.29156	1.21464	2.39671	1.50567	0.956946	1.23801		1.45032	0.312733	0.683102	0.647417	0.79541	0.509351	0.374383
1.31326	1.19462	1.31158	1.01761	0.966289	0.719636	1.72058	1.64964	1.54376	2.11851	0.750125		0.500023	0.582756	1.4519	0.519313	0.475106	0.170816	0.135758	0.563574			1.64688	1.36097	1.19836	1.11831	1.17904	2.3656	1.44949	0.865278	1.17125		1.37123	0.301375	0.670559	0.613301	0.749741	0.502369	0.362417
1.30295	1.11597	1.29992	0.985052	0.874468	0.719016	1.68656	1.62031	1.51174	2.01735	0.734862		0.48366	0.576887	1.43122	0.5053	0.453632	0.162837	0.127657	0.562164			1.63994	1.27474	1.1216	1.01686	1.16457	2.27234	1.44215	0.834599	1.13044		1.34888	0.298875	0.659064	0.612972	0.718955	0.438138	0.349308
1.26917	1.08714	1.26545	0.952282	0.869708	0.718721	1.62641	1.45584	1.40075	1.97761	0.701853		0.460985	0.571204	1.41846	0.487417	0.448994	0.145866		0.561375			1.63542	1.2201	1.11184	0.867009	1.12337	2.21318	1.42731	0.829956	1.0808		1.30592	0.298036	0.634018	0.5826	0.71728	0.422095	0.343774
1.22645	1.08253	1.22446	0.949034	0.842224	0.713059	1.58934	1.43559	1.32562	1.96062	0.691435		0.438583	0.552922	1.4062	0.487165	0.447313	0.143302		0.554679			1.55523	1.19151	1.08221	0.83036	1.07632	2.09923	1.38889	0.785064	1.06829		1.30534	0.297581	0.632056	0.551283	0.715051	0.422032	0.338918
1.17895	1.07858	1.17541	0.908113	0.830351	0.687848	1.52585	1.42561	1.28305	1.94605	0.681877		0.425149	0.520652	1.35417	0.477895	0.431115	0.141533		0.530175			1.5525	1.11245	1.057	0.829391	1.07115	1.95403	1.38607	0.737632	1.04705		1.2701	0.280307	0.598309	0.536633	0.694481	0.41365	0.334609
1.17225	1.03002	1.16852	0.894259	0.804112	0.673357	1.47894	1.38906	1.2562	1.9297	0.67989		0.389546	0.518898	1.3423	0.47119	0.43056	0.141423		0.518641			1.51423	1.09764	1.0411	0.821498	1.05862	1.84845	1.28422	0.721245	1.01588		1.26289	0.273357	0.594074	0.530011	0.688446	0.411467	0.330445
1.16988	1.02278	1.16823	0.87948	0.746285	0.653279	1.43747	1.34859	1.20845	1.87293	0.679651		0.380518	0.518533	1.28019	0.46914	0.412474	0.139466		0.513957			1.46466	1.08143	1.0232	0.819945	1.02483	1.77341	1.27259	0.697476	1.00162		1.24991	0.271589	0.59082	0.521126	0.682334	0.408132	0.328143
1.11217	1.00883	1.11084	0.855244	0.745023	0.635043	1.42504	1.26399	1.1072	1.8717	0.638218		0.379005	0.516796	1.26684	0.466749	0.399665	0.13584		0.49936			1.42535	1.06202	1.01707	0.813152	0.992401	1.69286	1.10703	0.689046	0.998193		1.22487	0.270264	0.585821	0.492318	0.681934	0.407398	0.322631
1.08797	1.00012	1.08438	0.825888	0.737092	0.619941	1.42201	1.22667	1.048	1.86825	0.633168		0.377039	0.501199	1.20914	0.465048	0.390863	0.134182		0.489895			1.40034	1.05538	0.97234	0.810429	0.991046	1.64079	1.09225	0.674013	0.995384		1.15421	0.26764	0.549279	0.490104	0.66375	0.395645	0.321581
1.03379	0.985095	1.07352	0.81284	0.729866	0.600166	1.34921	1.20294	0.983475	1.69859	0.612553		0.375818	0.48806	1.19173	0.463064	0.382105	0.133848		0.476834			1.37439	1.05029	0.967014	0.808113	0.972335	1.61037	1.04317	0.6635	0.995152		1.14393	0.267629	0.543428	0.487861	0.648254	0.384556	0.319155
1.03056	0.958768	1.03109	0.811292	0.728284	0.593986	1.32087	1.19386	0.974547	1.67727	0.579805		0.373929	0.485664	1.18394	0.462177	0.374909	0.133848		0.473835			1.37279	1.04954	0.949551	0.806068	0.925121	1.59484	1.02964	0.660809	0.992979		1.1409	0.265552	0.541582	0.481917	0.637447	0.383935	0.313822
1.00645	0.95594	1.02275	0.805712	0.726816	0.591612	1.31762	1.15146	0.961037	1.65093	0.579575		0.368996	0.478183	1.17411	0.452404	0.35157	0.132838		0.466797			1.34912	1.04314	0.941148	0.779643	0.918656	1.54603	0.971981	0.659091	0.979611		1.13492	0.261193	0.537056	0.47033	0.635149	0.355433	0.30997
0.991416	0.947706	1.00498	0.793787	0.697735	0.586457	1.29282	1.13732	0.948661	1.62597	0.565444		0.36797	0.474309	1.17229	0.443696	0.351501	0.132838		0.466717			1.3031	1.01034	0.920316	0.743214	0.896802	1.54139	0.950525	0.654159	0.976198		1.10949	0.252107	0.536469	0.464157	0.601022	0.355092	0.309843
0.989768	0.938939	0.987439	0.786646	0.697124	0.586334	1.29072	1.12829	0.944119	1.59121	0.563054		0.364881	0.464259	1.16796	0.443251	0.349816	0.132056		0.4611			1.29125	0.982915	0.914867	0.742727	0.896031	1.50909	0.929926	0.650272	0.97033		1.10445	0.247561	0.532539	0.462109	0.571761	0.353597	0.308049
0.965877	0.915488	0.98428	0.766133	0.691147	0.580112	1.24275	1.12219	0.924664	1.5401	0.55586		0.361836	0.462799	1.15403	0.441347	0.347884	0.131611		0.456506			1.28991	0.976278	0.89487	0.727814	0.866901	1.5073	0.929757	0.637537	0.959391		1.08676	0.247264	0.517002	0.461873	0.565594	0.34098	0.305435
0.944135	0.908744	0.963341	0.717714	0.684063	0.578086	1.22492	1.10891	0.91701	1.49303	0.552314		0.359306	0.461007	1.14794	0.439882	0.346641	0.131438		0.453775			1.18986	0.970091	0.870974	0.71791	0.863169	1.50019	0.920116	0.630831	0.950328		1.08323	0.234016	0.509621	0.459423	0.564367	0.340276	0.296178
0.925831	0.8854	0.941555	0.716697	0.672083	0.57293	1.20291	1.07299	0.912384	1.47596	0.545379		0.349473	0.458164	1.13818	0.438714	0.346167			0.449378			1.18695	0.94973	0.867421	0.709274	0.860904	1.49933	0.916511	0.62928	0.942444		1.06488	0.232136	0.50357	0.455343	0.559463	0.339445	0.287819
0.919546	0.880397	0.922615	0.696265	0.671274	0.568117	1.20084	1.07191	0.900499	1.40169	0.544666		0.341746	0.452759	1.10834	0.432195	0.345499			0.44407			1.18682	0.942729	0.86029	0.696293	0.858903	1.46098	0.905203	0.624861	0.934308		1.06423	0.229393	0.501093	0.453006	0.556976	0.330456	0.284364
0.915335	0.880024	0.918713	0.688024	0.662222	0.549954	1.19985	1.06588	0.898254	1.3613	0.50974		0.329082	0.447359	1.10233	0.428813	0.34392			0.442429			1.18445	0.941371	0.83074	0.668161	0.85816	1.45574	0.903186	0.618488	0.919245		1.05896	0.228997	0.497236	0.452483	0.551006	0.314851	0.283962
0.915285	0.879505	0.913528	0.67217	0.660124	0.521485	1.18162	1.06073	0.886419	1.32327	0.508467		0.328151	0.44364	1.08454	0.427577	0.338215			0.435035			1.16976	0.926609	0.829835	0.657574	0.854504	1.44722	0.896052	0.618367	0.918313		1.04118	0.228335	0.495673	0.452306	0.547742	0.310406	0.283078
0.911185	0.875597	0.909736	0.6701	0.65665	0.519836	1.18122	1.05666	0.858635	1.31145	0.491601		0.323266	0.442505	1.07293	0.427566	0.323779			0.428698			1.15594	0.925691	0.816348	0.6473	0.84658	1.36652	0.895082	0.615842	0.909805		1.03063	0.227346	0.495373	0.451553	0.538659	0.303929	0.282674
0.910485	0.863621	0.909597	0.663564	0.647047	0.500718	1.18079	1.05192	0.852243	1.30974	0.490051		0.320278	0.440884	1.05761	0.423876	0.317878			0.424141			1.15296	0.913832	0.80051	0.644068	0.835356	1.34075	0.884548	0.610739	0.896391		1.03063	0.222721	0.493267	0.443162	0.534566	0.302614	0.280411
0.908752	0.86026	0.907647	0.630903	0.645355	0.488382	1.16672	1.04366	0.847005	1.30277	0.48571		0.315241	0.440806	1.05255	0.417015	0.300932			0.416631			1.15098	0.910158	0.788453	0.642678	0.828587	1.32562	0.871139	0.602446	0.896309		1.02203	0.222265	0.491296	0.441407	0.534166	0.299206	0.280066
0.897507	0.848334	0.906983	0.62262	0.633688	0.47866	1.11929	1.04292	0.834932	1.29902	0.485676		0.312055	0.439558	1.03625	0.413586	0.299922			0.415808			1.14193	0.907293	0.773449	0.640018	0.78693	1.31573	0.870986	0.601926	0.879343		1.01534	0.221707	0.486105	0.440366	0.533514	0.297766	0.275974
0.872087	0.845345	0.894633	0.608279	0.618155	0.478387	1.11171	1.04191	0.834033	1.2989	0.485185		0.308376	0.42507	1.0344	0.406329	0.299295			0.415197			1.14028	0.906595	0.771261	0.634996	0.761837	1.30084	0.862672	0.597422	0.876441		1.00384	0.21792	0.484804	0.439511	0.532909	0.296361	0.275807
0.871581	0.844357	0.874294	0.593757	0.609029	0.475952	1.08084	1.03702	0.819891	1.29575	0.484145		0.305831	0.418358	1.02317	0.39182	0.297882			0.413309			1.13102	0.905918	0.768167	0.634123	0.758273	1.27463	0.855744	0.593372	0.875139		0.998799	0.217626	0.471415	0.438541	0.531215	0.29189	0.274147
0.870908	0.840211	0.869042	0.584525	0.595312	0.468132	1.06889	1.02808	0.796031	1.25154	0.481836		0.305505	0.412603	1.02197	0.387863	0.296937			0.406539			1.10429	0.90563	0.763128	0.60526	0.739264	1.25294	0.834978	0.593359	0.872375		0.979883	0.217556	0.4711	0.436995	0.525306	0.291713	0.27133
0.86863	0.839687	0.866789	0.5791	0.583381	0.463933	1.06513	1.01766	0.787182	1.2473	0.480847		0.305058	0.406523	1.01392	0.385736	0.286033			0.403044			1.06929	0.902553	0.73538	0.604456	0.710468	1.25102	0.833963	0.591511	0.863728		0.967426	0.216539	0.467995	0.43267	0.52193	0.288604	0.271261
0.85919	0.838615	0.865023	0.569717	0.579038	0.446726	1.06306	1.01418	0.777769	1.21107	0.479839		0.303873	0.404639	0.997839	0.384097	0.285605			0.397742			1.05471	0.888768	0.734615	0.602883	0.699754	1.24374	0.828602	0.582602	0.863679		0.941504	0.215658	0.463593	0.430739	0.507492	0.288213	0.268549
0.84756	0.83639	0.862661	0.566206	0.577933	0.421032	1.05918	1.00694	0.77558	1.20532	0.474761			0.400052	0.98284	0.380732	0.285086			0.397698			1.04191	0.888284	0.720516	0.600058	0.689555	1.23262	0.803615	0.578132	0.858191		0.935147	0.214651	0.458839	0.42926	0.496424	0.283318	0.267434
0.847412	0.836257	0.857222	0.563328	0.575546	0.419724	1.04503	0.981657	0.775188	1.19301	0.471666			0.396458	0.961875	0.377805	0.275761			0.394132			1.03523	0.881609	0.720398	0.58409	0.683262	1.21494	0.788384	0.574773	0.834821		0.931937	0.213492	0.458514	0.411253	0.494795	0.281072	0.267164
0.844349	0.835011	0.845233	0.562178	0.573687	0.41938	1.03154	0.9805	0.772222	1.1746	0.471032			0.395409	0.957531	0.369619	0.275594			0.393372			1.03418	0.87242	0.71015	0.569774	0.680145	1.21062	0.782681	0.559527	0.830241		0.930702	0.212097	0.456914	0.410806	0.482791	0.275214	0.26699
0.841806	0.830196	0.842452	0.5574	0.562818	0.417585	1.03025	0.968152	0.765407	1.16165	0.470009			0.394233	0.9536	0.366204	0.273706			0.390977			1.03008	0.869248	0.709936	0.563422	0.671255	1.21037	0.782292	0.540756	0.829362		0.921953	0.211421	0.454022	0.402923	0.47789	0.272229	0.260501
0.839108	0.829068	0.837177	0.540636	0.561019	0.416678	1.01524	0.955105	0.765133	1.13925	0.467137			0.387482	0.917184	0.361916	0.273095			0.387848			1.01434	0.866667	0.70052	0.558601	0.667872	1.20945	0.771727	0.534893	0.821804		0.919239	0.207062	0.452069	0.402022	0.470691	0.271486	0.259606
0.838952	0.827781	0.833984	0.532323	0.559036	0.408568	1.01266	0.952866	0.745275	1.12745	0.466548			0.380861	0.916715	0.35787	0.27038			0.387503			1.00408	0.862581	0.698638	0.552299	0.666524	1.20922	0.766491	0.534492	0.808888		0.918383	0.204642	0.448915	0.399706	0.470626	0.268155	0.25903
0.826728	0.82642	0.824294	0.529779	0.558955	0.40533	0.995433	0.947818	0.741667	1.12172	0.447136			0.38006	0.906544	0.355674	0.267697			0.386844			0.992629	0.861819	0.697134	0.547457	0.662596	1.19799	0.751841	0.525911	0.80389		0.916194	0.202902	0.448736	0.398154	0.46984	0.265346	0.254733
0.819729	0.820351	0.817616	0.511675	0.554542	0.401733	0.993498	0.942488	0.740945	1.1153	0.445845			0.377212	0.906106	0.352168	0.266405			0.382502			0.991437	0.858735	0.696997	0.523579	0.65851	1.19159	0.751248	0.508709	0.802424		0.913409	0.202601	0.447373	0.396568	0.468516	0.265295	0.25455
0.817905	0.815251	0.815952	0.51131	0.549847	0.398211	0.991026	0.936002	0.737303	1.11007	0.444332			0.376817	0.901565	0.351184	0.264928			0.382104			0.98757	0.854438	0.68841	0.516014	0.653542	1.18245	0.729521	0.5049	0.800207		0.899781	0.202181	0.445911	0.395559	0.466739	0.257357	0.253563
0.816508	0.814332	0.81528	0.507874	0.548243	0.397583	0.988242	0.934633	0.722717	1.09757	0.437645			0.37116	0.900183	0.349877	0.263424			0.378438			0.981814	0.85306	0.681626	0.510763	0.630856	1.1564	0.721127	0.502866	0.795241		0.885001		0.445399	0.393824	0.46414	0.256409	0.250062
0.814405	0.81156	0.813209	0.505208	0.547795	0.386409	0.979751	0.899118	0.719272	1.08429	0.43677			0.359259	0.893233	0.349275	0.263016			0.378076			0.979963	0.852914	0.673927	0.508021	0.620922	1.15321	0.718026	0.499958	0.7904		0.8704		0.44501	0.393763	0.459666	0.25379	0.248386
0.812509	0.810817	0.810293	0.495578	0.546901	0.385457	0.976702	0.893728	0.713573	1.04414	0.427743			0.35836	0.890218	0.340858	0.260961			0.376985			0.975017	0.836394	0.670164	0.505464	0.620095	1.11843	0.68256	0.494066	0.787249		0.866941		0.442563	0.393657	0.45884	0.253572	0.246344
0.805609	0.810811	0.804435	0.486329	0.546757	0.380501	0.971452	0.883161	0.709375	1.03899	0.424197			0.353148	0.886944	0.335933	0.259982			0.376911			0.970886	0.826391	0.66841	0.496336	0.616837	1.10065	0.680892	0.489887	0.786782		0.850571		0.439114	0.391961	0.457125	0.253475	0.243905
0.805411	0.800579	0.803307	0.48174	0.544554	0.376339	0.957901	0.852778	0.706199	1.03578	0.421826			0.351405	0.880851	0.335167	0.25834			0.375171			0.961611	0.824208	0.66605	0.491556	0.613906	1.06719	0.679078	0.481582	0.778043		0.849683		0.433482	0.390313	0.44692	0.253392	0.243866
0.800133	0.797892	0.798186	0.473725	0.54452	0.376027	0.950657	0.851927	0.703704	1.03332	0.398315			0.350648	0.863082	0.323278	0.256791			0.373949			0.94969	0.822545	0.661096	0.480559	0.612997	1.05342	0.669332	0.480422	0.777538		0.828637		0.427895	0.384802	0.443409	0.252373	0.242643
0.799835	0.788601	0.783676	0.466064	0.538365	0.371811	0.939745	0.83228	0.702947	1.03252	0.39435			0.349092	0.841441	0.321876	0.256427			0.37273			0.934635	0.819607	0.657213		0.612438	1.03401	0.658649	0.479498	0.771664		0.820435		0.424771	0.379373	0.440533	0.251798	0.242393
0.78823	0.787689	0.782724	0.456305	0.538362	0.371383	0.927253	0.821352	0.700219	1.02362	0.392237			0.346724	0.837056	0.32163	0.255909			0.364788			0.926128	0.809757	0.651248		0.612166	1.02435	0.644479	0.477392	0.770381		0.819762		0.424446	0.377994	0.440405	0.251698	0.242232
0.785346	0.76304	0.775476	0.455642	0.529124	0.37093	0.906361	0.817145	0.692792	1.01873	0.391186			0.3457	0.817704	0.32032				0.361052			0.914144	0.808619	0.643376		0.5862	0.986955	0.640827	0.476945	0.763182		0.819079		0.419926	0.369739	0.437825	0.249749	0.241782
0.77694	0.758069	0.771328	0.447873	0.526689	0.36994	0.904734	0.78708	0.683433	1.01546	0.388244			0.337158	0.815322	0.317043				0.358087			0.905252	0.804835	0.629485		0.585364	0.952367	0.63559	0.466143	0.757268		0.807201		0.419325	0.36624	0.431863	0.249051	0.240997
0.775788	0.734476	0.770514	0.446241	0.521855	0.369263	0.895891	0.78291	0.681365	0.95691	0.381407			0.336376	0.809166					0.35615			0.898749	0.802784	0.614346		0.579875	0.951533	0.613016	0.46507	0.750961		0.803893		0.41765	0.360628	0.427444	0.248976
0.775689	0.726267	0.769631	0.441497	0.517829	0.365895	0.894738	0.776264	0.67826	0.945243	0.376478			0.335582	0.80295								0.895701	0.792714	0.599493		0.56427	0.932585	0.597819	0.458859	0.742488		0.786665		0.413786	0.353367	0.418534	0.247496
0.771716	0.720735	0.768563	0.441111	0.51457	0.362535	0.892163	0.769356	0.67606	0.93356				0.333228	0.801567								0.891309	0.792434	0.576028		0.547822	0.906759	0.579505	0.455495	0.737519		0.782392		0.413568		0.417939	0.24579
0.770312	0.718879	0.766335	0.43645	0.514315	0.358898	0.871333	0.747065	0.673006	0.930966				0.331233	0.774778								0.891038	0.774897	0.567368		0.547642	0.898045	0.5763	0.451366	0.732283		0.778229		0.41181		0.410207	0.245517
0.768236	0.71878	0.746506	0.425793	0.511975	0.351214	0.856248	0.745558	0.659039	0.917258				0.329948	0.773311								0.885959	0.769661	0.564109		0.544564	0.869222	0.575487	0.443431	0.728306		0.777293		0.411433			0.244596
0.747821	0.711116	0.745683		0.509662	0.347534	0.855663	0.727121	0.653176	0.91347				0.329563	0.768027								0.88064	0.764284	0.562211		0.538176	0.866057	0.564812	0.440842	0.727843		0.774188		0.411036			0.24262
0.740501	0.709556	0.739237		0.500196	0.347016	0.832015	0.725038	0.646741	0.906535				0.325598	0.753266								0.880178	0.761574	0.560861		0.535412	0.865722	0.556638	0.440427	0.726161		0.773242		0.408794			0.237106
0.738001	0.707862	0.73518		0.500014		0.826026	0.720872	0.645285	0.894008				0.324891	0.73408								0.861405	0.760997	0.551279		0.524345	0.861987	0.550095	0.439737	0.724436		0.772911		0.406296			0.236431
0.73739	0.704733	0.733747		0.498256		0.820029	0.697243	0.639876	0.892214				0.324705	0.729181								0.857899	0.756663	0.548006		0.523743	0.858032	0.545495	0.439361	0.719496		0.771143		0.400892			0.235134
0.735814	0.696492	0.731138		0.494157		0.812041	0.694943	0.639831	0.881853				0.321025	0.728496								0.852774	0.752296	0.546016		0.522667	0.85587	0.545101	0.437928	0.718621		0.755651		0.392256			0.234628
0.731311	0.695538	0.728634		0.492491		0.8101	0.69457	0.635613	0.876401				0.320775	0.725516								0.845181	0.748214	0.544327		0.520681	0.851379	0.526014	0.437221	0.717994		0.755572		0.390897			0.234444
0.729425	0.690426	0.727052		0.491556		0.805275		0.633644	0.873554				0.319695	0.725425								0.837069	0.746819	0.542462		0.508175	0.842977	0.525132	0.431834	0.716362		0.74547					0.234166
0.728142	0.688522	0.726631		0.468427		0.799689		0.626709	0.86594				0.31474	0.720781								0.814093	0.74165	0.540575		0.505882	0.842076	0.523952	0.422678	0.715196		0.738826					0.231633
0.725875	0.686475	0.724636		0.466308		0.792252		0.623206	0.858316				0.313406	0.704948								0.807321	0.739228	0.533351		0.505122	0.812125		0.418617	0.709124		0.738619					0.231197
0.725854	0.685921	0.724462		0.46384		0.7867		0.621069	0.856356				0.311903	0.701426								0.802925	0.735929			0.485964	0.782471		0.417297	0.704602		0.737717					0.230849
0.724198	0.679534	0.719028		0.461036		0.774485		0.614667	0.85173				0.311623	0.697397								0.789411	0.732278			0.479397	0.781494		0.415733	0.703121		0.733572					0.23032
0.718934	0.678447	0.71886		0.458418		0.773246		0.608703	0.849639					0.697064								0.784847	0.727229			0.479263	0.775036		0.413839	0.701836		0.732496
0.718105	0.677947	0.717118		0.456322		0.772797		0.607266	0.847588					0.682744								0.780828	0.718267			0.472306	0.774107		0.411693	0.701733		0.726652
0.71383	0.676764	0.71525		0.45628		0.771794		0.60326	0.841115					0.680427								0.779887	0.710983			0.470485			0.408631	0.700291		0.725395
0.709611	0.675471	0.712676		0.451129		0.756717		0.602854	0.837571					0.679904								0.776394	0.710102			0.469945			0.407745	0.699686		0.721184
0.707756	0.661189	0.708435		0.450068		0.754004		0.596413	0.822936					0.677069								0.771376	0.706581			0.459101			0.406487	0.699013		0.712931
0.692442	0.656529	0.708301		0.444459		0.752681		0.596339	0.821263					0.674702								0.759162	0.70129			0.457591			0.403895	0.697906		0.697123
0.682084	0.653944	0.705313		0.441703		0.746512		0.584509	0.782768					0.667684								0.758242	0.700381						0.402417	0.688979		0.688814
0.681329	0.652594	0.687224				0.741832		0.575838	0.781545					0.664609								0.757523	0.700011						0.398056	0.687432		0.687533
0.671543	0.649108	0.680833				0.740297		0.573121	0.772023					0.638505								0.732168	0.696985						0.394472	0.682465		0.684002
0.668954	0.648067	0.680219				0.73265		0.571646						0.630091								0.72169	0.692566						0.393559	0.677566
0.668425	0.643755	0.670256				0.729141		0.565875						0.625148								0.717112	0.687177						0.392985	0.673081
0.667972	0.633766	0.666985				0.716341		0.56327						0.62124								0.716592	0.677341						0.391847	0.671561
0.665371	0.630657	0.666352						0.562299						0.612134								0.715747	0.677126						0.389822	0.669926
0.661312	0.625907	0.665231						0.558034						0.611739								0.702458	0.67624						0.388321	0.668543
0.661247	0.617804	0.664125						0.557295						0.605273								0.700016	0.672109						0.386321	0.668034
0.653785	0.611581	0.658461						0.556742						0.599235								0.68592	0.664812							0.667981
0.649555	0.611179	0.655967												0.583243								0.685412								0.658558
0.648915	0.610095	0.651372												0.578552								0.685015								0.656749
0.648178	0.609528	0.647581												0.562386								0.68108								0.65502
0.644732	0.607654	0.645824																				0.671213								0.654994
0.64375	0.603327	0.64497																				0.666874								0.654011
0.637092	0.600737	0.642843																				0.665895								0.651804
0.636392	0.596443	0.64279																				0.649055								0.64884
0.635952	0.592898	0.635309																				0.646914								0.644763
0.630401	0.589011	0.633728																				0.642102								0.640766
0.630117	0.586807	0.632612																				0.636665								0.639712
0.62927	0.582298	0.629063																				0.63364								0.637304
0.628776	0.58052	0.62896																				0.631981								0.631822
0.627663	0.580434	0.627736																				0.630015								0.624227
0.61756	0.579416	0.627168																				0.626601
0.616557	0.575372	0.626792																				0.625027
0.614896	0.574912	0.61483																				0.624491
0.613139	0.571383	0.613778																				0.623673
0.60759	0.568456	0.613507																				0.606168
0.607156	0.567619	0.611538																				0.600148
0.606348	0.563182	0.606274																				0.599829
0.603495	0.562647	0.605374																				0.598274
0.582791	0.560591	0.602931
	0.558403
	0.555061
	0.547919
	0.544547
	0.544367
	0.528764
	0.52582
	0.525503
G. Normalized intensity of positive pSmad2/3 nuclei vs. Cell tier from the YSL (50% epiboly)
50% epiboly
Dorsal																																																	Lateral
Control MO																											1/5x sqt + cyc MO																						Control MO
Ratio	Distance	Ratio	Distance	Ratio	Distance	Ratio	Distance	Ratio	Distance	Ratio	Distance	Ratio	Distance	Ratio	Distance	Ratio	Distance	Ratio	Distance	Ratio	Distance	Distance Bin (um)	Cell tier	AVG	SD		Ratio	Distance	Ratio	Distance	Ratio	Distance	Ratio	Distance	Ratio	Distance	Ratio	Distance	Ratio	Distance	Ratio	Distance	Distance Bin (um)	Cell tier	AVG	SD			Ratio
1.22645	0	0.81156	0	1.22446	0	0.825888	0	0.562818	0	0.713059	0	1.22492	0	1.10891	0	0.944119	0	2.11851	0	0.490051	2.74504	15	1	0.904323	0.395416		0.375818	0	0.518898	0	1.17229	0	0.487165	0	0.248703	0	0.12892	1.98439	0.18449	9.52152	0.561375	0	15	1	0.493861	0.298548			0.94969
0.915335	0.0737791	0.880397	1.25156	0.913528	0.0737791	1.17722	2.05225	0.546757	4.36282	0.719636	4.85363	0.991026	1.087	0.936002	0.330199	0.787182	0.821783	2.63922	0.0376028	0.491601	3.06066	30	2	0.638115	0.279206		0.544759	3.4022	0.613752	4.40656	0.9536	0.299419	0.519313	0.577578	0.475106	1.9993	0.132838	6.22745	0.127657	16.1061	0.603195	0.118548	30	2	0.375597	0.243847			0.895701
0.965877	0.989407	0.835011	1.57871	0.963341	0.989407	0.908113	2.60446	0.538365	4.39989	0.37093	5.25522	1.62641	1.13718	0.934633	0.671785	1.048	1.12355	1.30974	1.51814	0.485185	3.08413	45	3	0.445342	0.192943		0.425149	4.21072	0.387482	6.49124	1.02197	1.03178	0.443251	0.695535	0.477026	2.68229	0.132838	6.22745	0.139268	16.9104	0.518641	0.343185	45	3	0.30518	0.191812			1.37439
1.31326	1.14913	0.653944	1.68993	1.31158	1.14913	0.952282	6.57348	0.549847	4.79547	0.722371	5.44107	1.01524	1.21861	1.45584	0.895439	0.948661	1.47519	1.5401	2.75991	0.445845	3.40206	60	4	0.337688	0.147226		0.218688	4.56726	0.552922	6.65214	1.03625	1.57974	0.366204	3.82729	0.237492	3.9932	0.162837	6.24737	0.105614	19.9059	0.466717	2.19289	60	4	0.235009	0.126979			0.789411
1.11217	2.83776	0.726267	2.04399	1.11084	2.83776	0.766133	8.10601	0.575546	5.41572	0.673357	6.11497	1.11929	1.38202	1.22667	1.77684	1.60796	2.16332	1.97761	3.65834	0.39435	4.19359	75	5	0.250267	0.110043		0.364881	6.56118	0.396458	7.50011	1.43122	1.90409	0.441347	8.27635	0.431115	4.88809	0.114522	6.96941	0.11025	20.3135	0.387503	3.43613	75	5	0.201768	0.0740254			1.15098
0.911185	3.61489	0.810817	2.16218	0.909736	3.61489	0.949034	8.17662	0.511975	6.26917	0.463933	6.87686	1.72606	2.09206	1.04292	2.43341	0.796031	2.44233	1.25154	4.07091	0.480847	5.10442	90	6	0.199406	0.0796014		0.576464	8.55091	0.48806	8.52814	0.997839	2.34666	0.487417	8.91922	0.453632	4.96393	0.141533	9.04417	0.114375	21.178	0.339284	3.66052	90	6	0.17145	0.0453819			0.979963
1.85543	3.65461	0.788601	2.97272	1.85174	3.65461	0.5791	9.43517	0.546901	7.70237	0.568117	7.30947	1.68655	3.22477	1.20294	3.30847	1.20845	2.62997	1.67727	4.60514	0.48571	5.17147	105	7	0.169665	0.0607999		0.341746	9.55183	0.299386	9.35071	0.682744	4.12999	0.534213	9.90463	0.285086	5.50652	0.105349	11.344	0.105277	26.9081	0.329216	4.13558	105	7	0.148937	0.0411673			1.03008
0.910485	4.2807	0.838615	3.8749	0.719028	4.04843	1.37532	9.67287	0.554542	7.70846	0.687848	7.83419	1.58934	4.09549	0.747065	3.34707	0.886419	3.19848	1.62597	5.17509	0.638218	7.12146	120	8	0.151259	0.0452062		0.315241	10.3127	0.439558	10.0819	1.15403	4.19053	0.477895	9.90981	0.475894	5.56271	0.12599	11.909	0.135758	33.0422	0.466797	4.76057	120	8	0.140828	0.0292014			1.18445
1.08797	4.49705	0.958768	3.88583	0.906983	4.2807	0.793787	10.645	0.491556	7.75215	0.549954	8.32463	1.18079	4.6353	1.12829	3.86356	0.681365	4.00186	1.59121	5.75087	0.679651	7.67579	135	9	0.131254	0.0307566		0.389546	10.5451	0.349092	10.7777	1.14794	4.96682	0.258997	10.0717	0.263424	6.0899	0.19843	12.9289	0.10145	35.035	0.513957	4.84536	135	9	0.137725	0.0287521			0.671213
0.731311	4.52384	0.656529	4.0754	0.874294	4.36571	0.663564	11.8333	0.647047	7.99145	0.718721	8.34465	1.42201	4.90356	1.38906	4.19331	1.28305	4.63294	1.2473	5.75586	0.467137	8.59478	150	10	0.110178	0.000811774		0.302896	11.5067	0.254159	10.8452	0.837056	5.17267	0.377805	10.229	0.349816	6.36919	0.12949	13.2677	0.116347	36.7454	0.393372	6.27906	150	10	0.160345	0.0478027			1.42534
0.908752	5.10716	0.113959	4.81028	1.08438	4.49705	0.786646	13.0737	0.745023	8.08607	0.47866	8.60418	1.43747	5.58362	1.6203	4.28106	1.67602	5.03496	1.3613	6.06746	0.398315	8.60796						0.28913	11.7481	0.138749	10.8894	0.886944	5.3643	0.578498	10.5534	0.170199	6.48317	0.113821	13.5684	0.152924	42.0603	0.563574	6.37613							0.880178
1.47023	5.93631	0.711116	4.86317	0.728634	4.52384	0.985052	13.4588	0.444459	8.34228	0.408568	8.95808	1.91328	5.97858	0.9805	4.30296	0.355835	5.16117	1.96062	6.3035	0.55586	9.38867						0.323266	11.7968	0.287642	10.9773	1.01393	5.74748	0.423876	11.2856	0.390863	6.59668	0.109104	14.0241	0.101906	42.4369	0.49936	7.25358							1.06929
0.872087	5.99249	0.677947	4.93629	0.907647	5.10716	1.09709	13.9173	0.393139	9.56459	0.593986	9.48145	1.32087	6.91173	0.821352	4.34146	0.765133	6.47791	1.29902	7.65953	0.275695	9.73566						0.48366	12.061	0.634937	11.3543	1.0344	6.33383	0.465048	11.3077	0.447313	7.71606	0.118672	15.2852	0.114042	44.7073	0.562164	7.51589							0.807321
1.17895	7.41133	1.00012	5.13653	1.4666	5.93631	0.87948	13.9829	0.869708	9.61219	0.619941	10.2127	0.892163	7.36405	1.04191	5.54551	0.473033	7.03225	2.39811	7.7887	0.381407	9.9675						0.192808	12.3206	0.283312	11.4036	1.4062	6.40165	0.413586	12.7214	0.374909	8.53831	0.118672	15.2852	0.127267	45.9265	0.489895	7.56498							0.991437
1.26917	7.48271	0.675471	5.31127	0.869042	5.99249	0.81284	14.0803	0.97229	9.78232	0.586457	11.3495	0.988242	7.95842	1.02808	5.86548	0.565875	7.10542	1.69859	8.36566	0.50974	9.98703						0.278295	12.8887	0.474309	12.2921	0.704948	6.66726	0.380732	13.204	0.351501	9.55701	0.141423	17.521	0.115421	57.6821	0.355489	8.36083							1.66669
1.00645	7.73099	1.02278	5.50453	1.07352	7.38374	0.593757	14.473	0.494157	9.9161	0.57293	11.966	0.773246	8.37818	1.06588	6.08313	0.497308	7.30334	1.31145	8.52214	0.321585	10.3403						0.368996	14.7801	0.520652	12.856	0.961875	6.99762	0.384097	13.9074	0.317878	9.58922	0.128276	17.6958	0.107276	58.9316	0.453775	8.57061							1.05471
1.16988	7.73967	0.704733	6.02449	1.17541	7.41133	0.855244	15.5342	0.492491	10.1736	0.725446	12.156	1.06889	8.41805	0.952866	6.42537	0.91701	7.69862	1.9297	8.69723	0.466548	10.9705						0.262123	14.9212	0.329563	12.8972	1.20914	7.54539	0.443696	14	0.275761	9.82214	0.109153	19.9185	0.109498	67.6206	0.346951	8.73541							1.04191
1.30295	7.83333	1.07859	6.11158	1.26545	7.48271	0.5574	15.8399	0.728284	10.2957	0.397583	13.2741	1.20084	8.64623	1.01766	6.97536	0.713573	7.82421	1.87293	8.98494	0.552314	11.2365						0.259702	14.9992	0.395409	13.06	1.18394	7.96909	0.15284	14.0184	0.399665	9.96523	0.116597	20.1395			0.473835	9.09222							1.29125
0.814405	8.41144	0.985095	7.07645	1.00498	7.73099	1.01761	15.9128	0.561019	10.5009	0.635043	13.3899	1.24275	8.93672	0.947818	7.63098	0.898254	7.88638	1.86825	9.13138	0.371084	11.8752						0.377039	15.0313	0.452759	13.7149	0.880851	8.12851	0.335167	14.4853	0.299922	10.2184	0.134182	20.4669			0.254463	9.09259							0.891309
0.607156	8.77339	0.423433	7.47701	1.16823	7.73967	0.540636	16.1194	1.0642	11.5892	0.351214	13.6184	1.72058	8.93834	0.942488	8.69816	0.475171	8.186	1.2989	9.43767	0.579575	12.4764						0.182279	15.9315	0.485664	13.9828	1.05761	8.65105	0.439882	15.451	0.209553	10.3576	0.170816	21.3728			0.37273	9.42861							1.14028
0.735814	10.0734	0.472664	7.68073	1.29993	7.83333	0.717714	16.1902	0.842224	11.613	0.417585	14.0986	1.11171	9.14222	1.04366	9.03359	0.983475	8.59341	1.08429	9.63041	0.701853	14.2848						0.373929	15.9489	0.516796	14.0387	0.916715	9.28562	0.452404	15.9737	0.145844	11.2799	0.103799	21.8044			0.449378	9.77995							0.934635
0.61756	10.0916	0.76304	7.85925	0.813209	8.41144	0.62262	17.1935	0.830351	11.6941	0.229102	14.6084	0.446814	9.26203	1.64964	9.10063	0.974547	9.08854	1.8717	10.0018	0.691435	14.5808						0.156914	16.414	0.320775	14.0503	0.667684	9.32298	0.427566	16.6932	0.204161	11.593	0.10502	21.8103			0.442429	9.8482							0.685412
0.826728	10.3315	0.609528	8.35923	0.606274	8.77339	0.456305	17.5606	0.662222	11.8876	0.79274	14.9608	1.03025	9.66324	0.769356	9.12708	0.700219	9.09387	2.18747	10.1491	0.447136	14.8485						0.36797	17.0933	0.400052	14.1162	1.28019	9.55137	0.369619	17.4064	0.323779	11.6054	0.119425	22.2895			0.415197	9.91578							0.732168
0.775788	10.4075	0.439145	8.65682	0.733747	10.0734	0.811292	18.5252	0.54452	11.9245	0.600166	16.4805	0.906361	9.91565	1.12219	9.38548	1.54376	9.77706	1.03579	11.5359	0.349791	15.1663						0.289426	17.9748	0.42507	15.4768	1.26684	10.5107	0.406329	17.4106	0.194329	13.1474	0.131438	22.4448			0.403044	10.0568							0.666874
0.77694	10.6972	0.844357	9.92675	0.61483	10.0916	0.486329	18.9576	0.458418	12.1544	0.210868	17.444	1.73617	10.0569	0.883161	9.58841	0.719272	9.9207	0.945243	12.8778	0.545379	16.2302						0.209897	18.1224	0.331233	16.1029	0.801567	10.6713	0.46914	17.8883	0.203427	13.4702	0.145866	23.9599			0.476834	10.0972							0.845181
0.819729	10.8934	0.827781	9.99798	0.824294	10.3315	0.441497	18.9928	0.526689	12.2886	0.521485	17.5538	1.19985	10.0734	1.05666	9.88951	0.737303	10.1407	1.11007	13.1619	0.579805	16.6993						0.349473	18.2215	0.353148	16.2677	1.10834	10.9729	0.522661	18.3805	0.275594	13.629	0.105355	24.7882			0.613934	10.7662							0.759162
0.747821	11.0663	0.586807	10.237	0.771328	10.4075	0.608279	19.3821	0.618155	13.2475	0.500718	17.5777	0.708572	10.1342	1.06073	10.0888	0.474173	10.4665	1.13925	14.3241	0.565444	16.7142						0.359306	18.9555	0.458164	17.1537	0.957531	11.0499	0.47119	19.1557	0.1432	13.6997	0.105355	24.7882			0.530175	10.7842							0.624491
0.944135	11.1344	0.611179	10.6635	0.775476	10.6972	0.292198	19.4228	0.386124	13.6508	0.285746	18.0684	1.18162	10.272	1.42561	10.3893	0.621069	11.2791	1.65093	14.5357	0.437645	17.2282						0.328151	19.444	0.329948	17.2589	0.664609	11.887	0.39182	19.6361	0.346167	13.8741	0.126391	25.5894			0.35615	11.3248							0.814093
0.718105	11.4317	0.696492	10.7711	0.817616	10.8934	0.505208	19.9959	0.361635	13.8193	0.586334	18.3338	1.34921	10.2873	0.981657	10.4908	0.834932	11.3031	1.49303	14.7469	0.783864	17.3445						0.460985	19.5669	0.406523	17.2979	0.679904	11.9453	0.270505	20.1681	0.249187	14.3799	0.122735	25.9366			0.364788	11.614							0.891038
0.476705	11.8945	0.607654	10.8587	0.746506	11.0663	0.566206	20.2036	0.514315	14.1184	0.488382	18.3403	1.31762	10.3335	1.00694	10.8184	0.645285	11.312	0.85173	15.4513	0.259702	17.6543						0.269857	19.6573	0.337158	17.5636	0.638505	12.813	0.35787	20.1992	0.43056	14.9017	0.122735	25.9366			0.361052	11.8391							0.757523
0.925831	12.0428	0.810811	11.3538	0.941555	11.1344	0.447873	20.2421	0.544554	14.6278	0.40533	18.5091	1.47894	10.6576	0.955105	11.3204	1.40075	11.5995	1.03332	15.8285	0.612553	18.2169						0.293304	19.8833	0.135954	17.8254	1.16796	13.7903	0.438714	20.2453	0.537447	15.254	0.101461	27.9829			0.376911	12.0958							1.71472
0.770312	12.239	0.845345	11.3639	0.717118	11.4317	0.6701	20.3649	0.697735	14.7634	0.478387	18.7755	0.855663	10.8134	0.69457	11.4571	0.852243	11.8605	1.12172	16.606	0.474761	18.4445						0.361836	20.0605	0.310503	18.673	1.41846	14.2481	0.257676	20.3458	0.263016	16.3171	0.109937	28.0639			0.654942	12.4676							1.16976
0.919546	12.5234	0.611581	11.8299	0.474691	11.8945	0.805712	20.5145	0.573687	14.7673	0.653279	18.7838	1.29282	11.1571	1.07191	11.5133	0.483635	12.272	0.917258	16.6716	0.278664	18.6851						0.206265	21.1905	0.440884	18.7437	0.841441	14.6084	0.427577	20.5149	0.300932	16.4017	0.115164	28.4316			0.331725	12.9291							1.64688
0.567694	12.9432	0.830196	12.1955	0.922615	12.0428	0.357408	21.806	0.804112	14.7987	0.578086	19.0412	0.826026	11.1731	0.5867	12.4632	0.329364	12.5654	1.29575	16.7594	0.750125	19.1128						0.161786	21.5259	0.299826	19.1034	1.19173	14.8222	0.300821	20.6359	0.229152	16.9786	0.13584	32.4326			0.394132	13.2389							0.496316
0.841806	13.0235	0.42179	12.4717	0.768563	12.239	0.466064	22.0691	0.414977	15.2712	0.271027	19.3465	0.233805	11.6354	1.79662	12.5705	0.306311	12.7814	1.04414	16.8797	0.479839	19.1362						0.379005	22.6143	0.461007	19.2382	0.677069	15.214	0.182981	20.9491	0.448994	17.0954	0.185092	32.4378			0.435035	13.43							0.837069
0.85919	13.3284	0.487427	12.5646	0.918713	12.5234	0.569717	22.173	0.529124	15.4785	0.591612	19.4202	0.993498	11.989	1.43559	12.6872	1.32562	12.9803	1.20532	17.1686	0.242794	19.6823						0.129029	22.8375	0.669186	19.5434	1.13818	15.2543	0.285088	21.2747	0.267697	17.3415	0.176234	32.5125			0.554679	14.4609							1.18695
0.718934	13.959	1.08714	12.6143	0.566573	12.9432	0.67217	22.2729	0.538362	15.4839	0.41938	19.9422	0.771794	12.0247	0.626763	13.128	0.77558	13.15	1.1746	17.4367	0.34974	19.875						0.303873	23.1313	0.282051	19.8992	0.98284	16.5211	0.385736	21.2911	0.346641	18.567	0.105311	32.8302			0.386844	14.5701							0.716592
1.17225	14.0696	0.505768	13.1098	0.857222	13.3284	0.43645	22.9931	0.966289	15.5121	0.33064	20.1456	0.516987	12.4181	1.01418	13.6766	0.512334	14.2361	1.12745	18.1117	0.563054	20.0562						0.118433	23.243	0.359259	20.2973	0.307707	16.8414	0.276842	22.0292	0.107772	20.3072	0.133848	34.6111			0.456506	15.9017							1.13102
0.805609	14.1313	0.511585	13.1121	0.71525	13.959	0.532323	23.3641	0.517829	16.2257	0.329122	20.3155	1.01266	12.5539	2.04	14.1128	0.740945	14.3378	0.91347	18.156	0.300221	20.0796						0.380518	23.6982	0.478183	20.3531	1.02317	17.4117	0.244418	22.0858	0.215749	20.8785	0.133848	34.6111			0.397698	16.1585							0.649055
0.630117	15.1948	0.648067	13.2036	1.16852	14.0696	0.511675	23.5133	0.595312	16.4506	0.376339	20.8427	0.904734	12.8611	0.817145	14.1309	0.556742	14.6028	1.21108	18.4702	0.392237	20.1078						0.249201	24.0477	0.298327	21.1291	1.07293	17.7452	0.200513	22.2506	0.412474	21.1032	0.121854	35.7176			0.313374	16.3076							1.15594
1.03379	15.4726	0.797892	13.7568	0.804435	14.1313	0.630903	24.2905	0.37614	16.4831	0.446726	22.15	0.705099	13.2041	1.03702	14.1458	1.76606	15.0932	1.47596	18.6534	0.256249	21.362						0.438583	25.6923	0.239275	21.8726	1.08454	18.3019	0.129882	22.8564	0.34392	21.209	0.139466	36.1815			0.378438	17.2237							0.576588
0.692442	15.8824	0.840211	14.0071	0.111114	14.43	0.417565	25.6198	0.359795	16.5522	0.369263	22.7743	0.894738	13.4825	1.26399	14.4795	0.673006	15.1296	0.906535	18.7337	0.421826	21.9133						0.305831	26.2118	0.30534	22.3303	0.479141	18.611	0.355674	22.8711	0.207872	21.555	0.117646	36.253			0.415808	17.6339							1.40034
0.817905	16.205	0.558403	14.1667	0.62896	15.1948	0.716697	25.6369	0.521855	16.8776	0.29003	22.8191	0.716341	14.4404	0.78708	14.6195	0.775188	15.9807	1.03899	19.67	0.633168	22.0959						0.308376	26.4143	0.30338	22.6393	0.720781	18.8553	0.210054	23.8625	0.100841	21.716	0.110544	40.8719			0.413309	17.7299							1.5525
0.536857	16.9537	1.3058	14.297	1.03109	15.4726	0.379833	25.7242	0.974632	17.0732	0.303528	22.8718	0.614202	14.4965	0.968152	15.131	0.314404	16.3451	1.09757	20.1837	0.388244	22.6931						0.189237	28.1025	0.304556	23.456	1.4519	18.9482	0.5053	23.8887	0.296937	21.9466	0.100497	45.8359			0.332734	17.7613							1.46466
0.725854	17.1963	0.592898	14.3027	0.687224	15.8824	0.455642	25.7536	0.509662	17.3096	0.36994	23.0719	1.04503	14.9536	0.725038	17.2534	0.777769	16.3513	0.86594	20.3915	0.192209	22.9199						0.271135	29.4183	0.404639	23.6823	1.50073	19.1149	0.335933	24.0116	0.382105	22.1818	0.132056	46.4301			0.44407	18.2151							0.885959
0.812509	17.8752	0.468893	14.3312	0.815952	16.205	0.48174	25.9569	0.500196	17.4256	0.307234	23.0798	0.588046	15.1945	0.776264	17.3625	0.607266	16.4367	1.16164	21.071	0.213763	23.1182						0.305505	29.5436	0.571204	24.142	0.773311	19.1286	0.432195	25.0642	0.229881	22.6753	0.11204	47.1329			0.4611	18.2255							1.51423
0.84756	17.9974	1.11598	15.1993	0.535338	16.9537	0.409921	25.9611	0.43827	17.8065	0.268536	23.5459	0.976702	15.3916	1.19386	17.4685	0.741667	16.5462	0.660452	21.1075	0.349359	23.343						0.217854	30.1798	0.169698	24.1591	0.815322	19.1724	0.466749	25.1786	0.153651	23.1648	0.11204	47.1329			0.428698	18.3217							0.852774
0.991416	18.2224	0.563182	15.3235	0.724636	17.1963	0.423124	26.1169	0.389444	18.3566	0.285035	23.855	0.729141	16.5119	1.13732	17.641	0.847005	16.6045	0.93356	21.2135	0.508467	23.6907						0.147512	30.4049	0.447359	24.274	0.753266	19.1975	0.305328	25.3227	0.256427	23.978	0.108901	47.4139			0.208473	18.3923							2.04177
0.668425	18.2444	0.679534	15.459	0.810293	17.8752	0.562178	26.3907	0.229058	18.4368	0.519836	23.9908	1.03154	16.7019	1.05192	17.6878	0.961037	16.6135	1.01873	21.4917	0.3558	24.0155						0.199694	30.8359	0.376817	24.3259	0.863082	19.3109	0.190366	26.1332	0.35157	24.1485	0.108901	47.4139			0.291417	18.4541							0.598274
0.707756	18.5537	0.544547	16.1141	0.845233	17.9974	0.495578	26.7539	0.324889	19.3259	0.358898	24.4257	1.42504	17.47	1.9679	17.9932	0.573121	16.9818	1.19301	21.6611	0.261622	24.2944						0.53515	31.7694	0.27652	24.3893	1.3423	19.3779	0.463064	26.607	0.225869	24.8726	0.107311	48.3485			0.276798	18.8637							0.780828
1.03056	18.5655	0.787689	16.2446	0.987439	18.2224	0.507874	27.5816	0.729866	19.386	0.719016	24.4623	0.895891	18.2522	0.83228	18.2519	0.683433	17.5676	0.881853	21.7762	0.311248	24.7823						0.286209	32.4987	0.501199	24.6883	1.05255	20.1847	0.352168	26.6227	0.247168	25.2218	0.108402	49.182			0.376985	19.1768							0.758242
1.32908	18.7531	0.630657	16.2523	0.666985	18.2444	0.529779	28.5805	0.238209	19.6377	0.380501	24.6388	0.552041	18.2624	0.78291	18.3523	0.461818	17.8215	0.772023	22.0663	0.681877	24.895						0.286306	32.8824	0.333228	25.0132	0.697064	20.6359	0.361916	27.5852	0.246734	25.293	0.102148	49.2307			0.30437	19.5288							1.55523
0.71383	18.8989	0.439476	16.4253	0.705313	18.5537	0.894259	28.6233	0.456322	19.7551	0.365895	24.7512	1.05918	18.3483	0.459539	19.3295	0.320758	17.8421	0.764914	22.1019	0.471666	24.9945						0.500023	33.808	0.518533	25.6949	0.900183	20.8546	0.349275	27.7105	0.338215	25.3086	0.131611	53.9352			0.358087	19.5336							1.15296
0.62927	19.1984	0.575372	16.5016	1.02275	18.5655	0.222935	28.7323	0.746285	19.7976	0.271289	24.7743	0.694578	19.4183	0.467617	19.8022	0.519954	17.8706	0.873554	22.2156	0.303217	25.0396						0.329082	34.2099	0.321025	26.2718	0.674702	20.992	0.261058	27.7321	0.126127	25.338	0.100261	54.2956			0.416631	19.8395							0.546285
0.728142	19.2192	0.525503	16.6364	1.32238	18.7531	0.308428	29.1653	0.277336	19.9608	0.580112	24.9469	0.648925	19.7612	0.669109	20.3007	0.623206	18.0222	0.930966	22.3519	0.239391	25.0473						0.27573	34.7181	0.44364	26.4534	0.906544	21.3091	0.304657	27.9483	0.347884	25.6672	0.100261	54.2956			0.382104	20.2							0.53655
0.847412	19.44	0.815251	16.6951	0.712676	18.8989	0.37875	29.2298	0.684063	20.4981	0.475952	25.1606	1.16672	20.0252	1.15146	20.8499	0.437027	18.0374	0.781545	22.4547	0.471032	25.1564						0.217951	35.453	0.442505	26.8531	0.533108	21.8622	0.417015	27.9808	0.299295	25.6963	0.105899	58.6551			0.278994	22.0426							0.514661
0.771716	19.5842	0.512231	16.8064	0.627736	19.1984	0.696265	29.7575	0.671274	20.8802	0.2997	25.4125	0.543828	20.2697	1.34859	20.9863	0.511737	18.0757	0.821263	22.6779	0.286871	25.5603						0.12652	36.7795	0.582756	26.8751	0.513564	21.925	0.229041	28.0447	0.27038	25.7565	0.124104	62.9903			0.387848	22.262							1.63994
0.816508	19.7897	0.690426	17.4957	0.727052	19.2192	0.38003	29.9685	0.645355	21.2962	0.468132	25.5452	0.792252	20.5931	0.664655	21.9437	1.51174	18.2567	0.841115	22.8827	0.266936	25.668						0.252349	37.7024	0.217207	27.2784	0.80295	22.4408	0.428813	28.6333	0.219733	25.809	0.115489	66.9379			0.346529	22.4206							0.88064
0.838952	20.2253	1.43049	17.5189	0.708435	19.5609	0.365403	30.0965	0.874468	21.5003	0.216404	25.6729	0.626802	20.7164	0.521049	21.9645	0.722717	18.4897	0.597408	23.0739	0.138965	25.7959						0.186807	37.7628	0.313406	27.4793	0.611739	22.6889	0.255666	29.1828	0.203533	25.8964	0.143302	67.8415			0.382502	22.4841							0.552825
0.725875	20.6521	0.758069	18.0162	0.770514	19.5842	0.177195	30.3356	0.298061	21.6645	0.421032	26.3003	1.08084	20.8873	0.899118	22.0532	0.364788	18.5169	0.758495	23.3781	0.391186	26.0534						0.15098	38.7894	0.351405	27.4871	0.697397	23.0762	0.315682	29.828	0.217783	26.0535	0.112424	68.105			0.275164	22.5489							0.784847
0.738001	20.6605	0.879505	18.2233	0.81528	19.7897	0.51131	30.7076	0.399068	21.9693	0.143932	26.4278	0.117911	21.1566	0.648136	22.1714	0.702947	18.8691	0.876401	23.5082	0.247728	26.3583						0.320278	39.0036	0.246133	27.7284	0.917184	24.1524	0.121497	30.111	0.285605	26.53	0.107465	79.8961			0.2714	22.6074							0.771376
0.385345	20.7258	1.49806	18.2602	0.833984	20.2253	0.688024	31.1304	0.609029	22.3102	0.385457	27.0961	0.402149	21.2762	0.508211	22.2503	0.639831	18.8721	0.837571	23.5368	0.889252	26.7608						0.191749	39.7589	0.35836	28.8002	0.189346	24.6881	0.291939	30.3029	0.23075	27.0495	0.116783	82.6135			0.114267	23.5105							1.63542
0.606348	21.3601	0.908744	19.1213	0.724462	20.6521	0.363478	31.2292	0.672083	22.3472	0.376027	27.633	0.713084	21.4556	0.57644	22.3567	0.43001	18.967	0.892214	23.991	0.197904	26.8383						0.312055	41.4539	0.30176	29.0873	0.774778	24.9476	0.250887	30.7252	0.260961	27.0965	0.112472	122.847			0.143178	23.6687							0.572793
0.64375	21.3951	0.509731	19.1853	0.731138	20.6605	0.415626	31.2299	0.304509	22.6461	0.274776	27.8043	0.979751	21.4699	1.07299	22.7198	0.448867	19.1914	1.01546	24.4341	0.863349	26.8665						0.14606	42.1781	0.311623	29.1876	0.729181	25.3183	0.210853	30.867	0.232769	27.5419					0.198436	23.7957							0.533952
0.839108	21.5914	0.567619	19.3286	0.380571	20.7258	0.288634	31.277	0.318764	22.9704	0.235922	28.4939	0.774485	21.6989	0.638566	23.0877	0.858635	19.302	0.767954	24.7316	0.67989	27.1694						0.249343	43.7295	0.197545	29.3117	0.725425	25.5505	0.260366	31.1062	0.170605	27.7603					0.424141	24.1012							0.685015
0.564326	21.692	1.19462	19.4667	0.605374	21.3601	0.257931	31.3167	0.377207	22.9728	0.140072	29.8464	0.756717	21.8041	0.720872	23.2185	0.265235	19.7817	2.01735	24.9438	0.734862	27.291						0.278154	46.0169	0.309099	30.8449	0.457107	25.7738	0.351184	31.3547	0.297882	28.4021					0.375171	25.3703							0.715747
0.681329	22.1908	0.863621	20.081	0.642843	21.3951	0.233835	31.6757	0.224957	23.8377	0.201507	29.9039	1.52585	21.9482	0.553641	23.482	0.481538	20.9012	1.94605	25.0597	0.332809	27.3454						0.305058	46.089	0.272048	30.8675	1.17411	27.1004	0.168997	32.4516	0.266405	29.2723					0.290999	25.4174							0.665895
0.636392	22.4735	0.836257	20.1323	0.837177	21.5914	0.33912	32.5543	0.406743	24.0322	0.153556	30.1495	0.66116	22.1833	0.852778	23.5653	0.67826	21.034	1.03252	25.1932	0.322629	28.0925						0.106351	46.5757	0.229698	31.1729	0.482069	27.1625	0.321876	32.6022	0.250645	29.4526					0.339893	25.5651							1.01434
0.561178	22.5479	0.473395	20.3146	0.563131	21.692	0.425793	32.6753	0.466308	24.4262	0.14567	30.989	1.29071	22.3517	0.260679	25.1746	0.765407	21.4982	0.822936	25.2348	0.224158	28.6746						0.108872	46.5796	0.440806	31.5947	1.10233	27.3662	0.124324	32.732	0.119056	29.6334					0.296184	25.991							0.454489
0.668954	22.9685	0.589011	20.4624	0.680219	22.1908	0.326518	33.1414	0.468427	24.5831	0.171973	31.0327	0.641192	22.5358	0.571605	25.4825	0.584509	21.5126	1.30277	25.5622	0.260442	29.0223						0.265596	46.7076	0.289055	31.7543	0.458381	27.774	0.349877	32.7968	0.345499	29.6398					0.378076	26.8896							0.702458
0.648915	23.1237	0.709556	20.5618	0.633728	22.4735	0.584525	33.1698	0.498256	24.8551	0.297911	31.3378	1.06513	22.8088	0.745558	25.7668	0.184656	21.6393	1.1153	25.6438	0.43677	29.1307						0.252299	47.7222	0.230363	32.5188	0.605273	28.0228	0.340858	32.973	0.154993	30.288					0.397742	26.9358							1.3031
0.805411	23.8623	0.875597	20.6435	0.559078	22.5479	0.399247	33.374	0.450068	24.8895	0.371383	31.7953	0.805275	22.8332	0.635395	25.8782	0.510051	22.1393	0.858316	25.7409	0.282453	29.3841						0.140228	48.6953	0.324891	33.0319	0.680427	28.044	0.294565	33.6229	0.152146	31.381					0.406539	27.2383							0.568583
0.517236	23.8641	0.800579	20.952	0.666352	22.9685	0.366163	33.4083	0.461036	24.9242	0.221919	32.5123	0.608922	23.0478	0.581706	26.3359	0.282276	22.213	0.894008	25.8407	0.376478	29.7211						0.196286	48.9608	0.283041	33.225	0.893233	28.2641	0.26071	34.1417	0.286033	31.6654					0.193401	27.6537							0.417339
0.709611	23.9847	0.357557	21.0468	0.645824	23.1237	0.329495	33.9421	0.737092	25.1588	0.187008	32.7319	0.7867	23.231	0.727121	27.8149	0.912384	22.8739	0.712571	27.5769	0.175971	29.9197						0.202952	50.5921	0.31474	33.2852	0.493009	29.0531	0.234911	34.2163	0.123082	32.0608					0.331791	27.8717							1.18682
0.800133	24.0163	0.633766	21.1972	0.745683	23.3438	0.194781	34.3011	0.583381	25.3297	0.362535	33.7042	0.535676	23.39	0.52289	27.9346	0.602854	23.0782	0.849639	27.6409	0.258508	30.4607						0.126496	50.8465	0.165021	33.7925	1.35417	29.3818	0.32163	35.0353	0.227257	32.6908					0.276	27.9686							0.51104
0.724198	24.3877	0.485527	21.3301	0.803307	23.8623	0.250713	34.3247	0.697124	25.3804	0.333687	33.817	0.552327	24.051	0.551507	28.1784	0.276341	23.3583	0.721994	28.1298	0.427743	30.6145						0.215241	51.8129	0.380861	34.439	0.443217	30.1218	0.237146	36.6724	0.273706	33.7984					0.249216	28.1483							1.00408
0.613139	24.8131	1.00883	21.362	0.516161	23.8641	0.268038	34.5961	0.46384	25.6174	0.272347	33.9533	0.740297	24.2212	0.425605	28.5595	1.2562	23.5694	1.40169	28.4091	0.203649	30.9315						0.214855	52.3369	0.240924	34.5206	0.906106	30.5658	0.18804	37.7674	0.222325	35.0314					0.390977	28.1763							0.700016
0.729425	24.8178	0.707862	21.4992	0.708301	23.9847	0.272145	35.5524	0.691147	25.8453	0.206062	34.0828	0.269549	24.3698	0.418962	29.8625	0.819891	23.8314	0.742077	28.6131	0.484145	32.0483						0.163222	52.8375	0.244687	34.5483	0.482719	30.8785	0.462177	38.0661	0.207218	35.6526					0.322934	28.1864							1.10429
0.567746	25.0004	0.676764	21.6603	0.71886	24.3877	0.563328	36.9913	0.354723	27.1913	0.234697	34.1836	0.871333	24.9933	0.427467	30.0505	0.706199	24.2326	0.856356	28.6574	0.235465	32.1115						0.300942	53.3258	0.271294	34.5631	0.549252	31.1138	0.249148	38.1522	0.137085	35.9368					0.300407	28.2549							1.37279
0.556483	25.2265	0.947706	21.7669	0.611538	24.8131	0.473725	37.3494	0.294041	27.2801	0.347016	34.2903	0.705366	25.503	0.577075	30.9816	0.596339	24.64	0.609555	29.524	0.304838	32.4418						0.220721	53.4103	0.265224	34.955	1.5281	31.3089	0.387863	38.7215	0.105818	36.3205					0.272797	28.2771							0.476156
0.86863	25.4177	0.499168	21.7823	0.726631	24.8178	0.301116	37.3512	0.548243	27.4025	0.243278	34.4341	0.494309	25.8337	0.893728	31.1615	0.233422	25.1161	0.551565	29.9405	0.485676	32.6884						0.185015	56.2442	0.298894	35.0792	0.38384	31.646	0.249521	38.8409	0.25834	36.6022					0.309875	28.6118							0.646914
0.54364	25.6146	0.720735	21.9044	0.566715	25.0004	0.250631	38.3971	0.437464	27.6759	0.144432	35.1149	0.674122	25.9135	0.851927	31.2195	0.335337	25.2181	0.657463	29.9736	0.146033	32.7684						0.134047	57.8854	0.319695	35.2309	0.73408	31.8493	0.323278	39.0825	0.146844	37.4098					0.276748	28.6438							0.58085
0.785346	25.7669	0.86026	21.9811	0.553795	25.2265	0.2193	38.3977	0.577933	27.7989	0.152351	35.1412	0.939745	26.3607	0.5854	31.2274	0.105357	25.2804	0.635994	30.2961	0.313918	32.8806						0.174633	60.0466	0.229633	35.3296	0.728496	32.5064	0.225633	39.128	0.181027	37.4899					0.353392	28.7702							0.463966
0.799835	26.2791	0.71878	22.0153	0.865023	25.4177	0.373219	38.9808	0.347233	27.9859	0.108649	36.0857	0.458965	27.4785	0.490742	31.5145	0.379338	26.0811	0.660793	31.4835	0.217903	33.104						0.187382	60.6496	0.394233	35.9512	0.901565	32.6607	0.155344	39.5395	0.169992	38.4797					0.243038	28.8718							0.557157
0.989768	26.4313	0.500454	22.3929	0.542174	25.6146	0.332587	39.5144	0.390248	27.9872	0.419724	36.3449	0.391398	28.0487	0.446869	32.1321	0.772222	26.1776	0.691943	32.6409	0.32978	33.5641						0.163915	61.5244	0.464259	35.986	0.725516	32.9583	0.32032	39.5415	0.233024	38.4802					0.321272	28.998							0.961611
0.424973	26.5374	0.453368	22.5222	0.782724	25.7669	0.334644	39.6952	0.352594	28.0143	0.316902	36.6972	1.20291	28.1657	0.438751	32.1677	0.450123	26.1977	0.486446	32.779	0.323495	33.9787						0.15593	62.2608	0.308415	36.1353	0.817704	33.2023	0.29243	40.5525	0.140669	38.5748					0.1348	29.4169							0.135218
0.768236	26.6538	0.366804	22.6357	0.798186	26.2791	0.248559	39.9725	0.345127	28.1746	0.200955	36.8034	0.41233	28.6698	0.512779	34.5614	0.398782	26.2523	0.641618	32.9231	0.357779	35.3357						0.127748	64.5025	0.325598	36.7567	0.405392	33.5072	0.15396	41.5966	0.197494	39.1262					0.277234	29.4447							0.558587
0.549107	26.7842	0.568456	22.8964	0.98428	26.4313	0.292263	41.14	0.375763	28.2243	0.416678	36.9209	1.06307	28.756	0.565339	35.2057	0.209401	26.8327	0.510031	32.9316	0.371921	35.8745						0.208986	65.8978	0.377212	36.8962	0.809166	33.606	0.261355	42.1932	0.182315	39.13					0.278902	29.541							1.18986
0.915285	26.9516	0.938939	23.0191	0.419664	26.5374	0.446241	41.468	0.267755	28.4034	0.120485	37.7919	0.772797	28.8074	0.58773	35.211	0.56327	27.0514	0.682361	32.9929	0.208904	36.192						0.206816	65.9315	0.19792	36.9025	0.504114	33.9669	0.211931	42.4552	0.259982	39.204					0.318385	30.3739							0.776394
0.871581	27.0328	0.516395	23.0224	0.766335	26.6538	0.251693	41.7237	0.392455	28.5408	0.121185	38.2302	0.754004	29.0559	0.301153	35.2591	0.745275	27.1085	0.499653	33.0422	0.424197	36.5537						0.146606	66.8238	0.576887	37.6107	0.562386	34.5218	0.21344	42.7433	0.255909	39.226					0.306247	30.5306							0.802925
0.648178	27.4987	0.368721	23.2259	0.546588	26.7842	0.30044	42.2719	0.385731	28.6856	0.148535	38.3894	0.347891	29.1021	0.425179	35.4338	0.659039	27.4772	0.95691	33.8622	0.117699	36.796						0.185965	72.0192	0.290859	38.0256	1.6574	34.9456	0.197576	43.9884	0.251246	39.8291					0.299827	30.6799							1.28991
0.616557	27.694	0.83639	23.6749	0.909597	26.9516	0.347345	43.0237	0.51457	28.96	0.16863	38.5784	0.8101	29.2309	0.658745	35.4381	0.646741	27.5978	0.468014	33.936	0.182302	37.1389						0.134307	75.425	0.38006	38.2728	0.362912	35.0331	0.246291	44.7125	0.180248	40.9756					0.180666	31.9421							0.861405
0.3064	27.8653	0.562647	23.7065	0.862661	27.0328	0.244006	43.2624	0.206472	29.0805	0.10131	38.9298	0.417404	29.3394	0.694943	35.9457	0.440176	27.6123	0.487215	34.3082	0.286889	37.313						0.198704	76.7635	0.228673	38.3888	0.612134	35.3573	0.277668	44.8441	0.273095	41.2018					0.265034	32.0082							0.914144
0.628776	27.9492	0.82642	23.7446	0.64497	27.4987	0.346542	43.3382	0.424198	29.5715	0.386409	39.0897	0.532141	29.428	0.5451	36.941	0.635613	28.1958	0.117886	34.8572	0.481836	37.5069						0.13325	78.3351	0.267347	38.9807	0.471613	35.4375	0.260394	44.8673	0.173917	42.706					0.129111	32.2328							0.992629
0.460141	28.0455	0.484237	24.5726	0.613778	27.694	0.317529	43.4839	0.364338	30.0295	0.247775	39.1767	0.752681	29.636	0.318583	36.9946	0.653176	29.2322	0.588402	34.9998	0.357565	37.68						0.150539	82.2886	0.252688	39.1912	0.578552	35.6439	0.133535	45.4141	0.13754	43.2248					0.196837	32.7251							0.98757
0.544356	29.0809	0.839687	25.2746	0.297966	27.8653	0.156059	44.1761	0.559036	30.2906	0.308797	39.3606	0.15448	29.7657	0.697243	37.0724	0.457751	29.429	0.401072	35.0973	0.320981	38.0365						0.156123	86.6129	0.350648	39.5184	0.369788	35.6449	0.264972	45.423	0.184205	43.3072					0.216677	32.7566							0.555203
0.558352	29.9305	0.814332	25.4302	0.627168	27.9492	0.193765	44.3859	0.633688	30.4853	0.23485	39.7191	0.404967	30.1387	0.543438	37.7913	0.703704	29.8225	0.782768	35.1483	0.229657	39.0092						0.100767	93.8424	0.3457	40.1066	0.768027	35.6728	0.217007	45.431	0.214513	44.388					0.134931	33.7805							0.471481
0.503088	30.2107	0.464473	25.4503	0.451977	28.0455	0.441111	44.5692	0.374059	31.0494	0.398211	39.905	0.927253	30.2286	0.384614	38.385	0.322837	29.9854	0.601208	35.2426	0.286524	39.4961						0.120185	94.0174	0.37116	40.649	0.545614	35.9034	0.239288	45.4821	0.249831	45.2583					0.291464	34.4391							0.531928
0.485085	30.233	0.600737	25.4842	0.543474	29.0809	0.379629	44.6241	0.312942	31.3315	0.254966	40.0505	0.432001	30.3789	0.514892	38.3957	0.67606	30.0198	1.32328	35.3961	0.184446	39.747						0.117627	94.6385	0.462799	40.6637	0.599235	36.6427	0.229354	45.6412	0.256791	45.9644					0.308462	34.5486							0.631981
0.535227	30.3933	0.43079	25.4901	0.557168	29.9305	0.26557	44.8704	0.65665	31.4092	0.196144	40.309	0.856248	30.798	0.358322	39.3246	0.432467	30.0611	0.555087	35.4001	0.285721	40.3456						0.129786	97.665	0.186049	40.9074	0.252881	36.8502	0.309321	45.9068	0.148211	46.0212					0.316444	34.8032							0.5276
0.582791	30.4221	0.416508	25.6885	0.500496	30.2107	0.403839	44.9258	0.219719	31.7601	0.208922	40.4577	0.62645	31.2504	0.332877	40.4434	0.558034	30.327	0.651658	35.8209	0.240919	40.7265						0.105765	101.26	0.187323	41.0899	0.397945	36.992	0.317043	46.3385	0.13756	48.0276					0.234525	35.4824							0.549419
0.451165	30.9561	0.476334	25.9141	0.477251	30.233	0.332558	45.0047	0.236749	32.2557	0.31282	41.256	0.677817	31.5148	0.296545	41.4863	0.60326	30.4754	0.718331	36.0224	0.242013	40.7874						0.12231	108.921	0.293054	41.4536	0.489711	37.0651	0.154113	46.8187	0.186006	49.7046					0.350495	35.7223							0.898749
0.637092	31.1129	0.649108	26.51	0.531657	30.3933	0.331711	45.6137	0.319272	32.3603	0.347534	41.8976	0.73265	31.8415	0.490449	42.3105	0.626709	30.4865	0.588289	36.3656	0.544666	41.0215						0.16642	109.073	0.204112	41.4552	0.45891	37.1826	0.132209	47.3882	0.149235	49.8981					0.296237	36.2487							0.530212
0.661247	31.7724	0.571383	26.518	0.580794	30.4221	0.258464	46.1494	0.726816	32.5639	0.162943	42.1969	0.493303	31.9204	0.327177	42.7618	0.900499	30.7546	0.701512	36.79	0.305036	41.4903						0.102907	120.474	0.154008	42.331	0.311485	38.2122	0.308884	47.4311	0.171857	50.061					0.218762	36.6678							0.606168
0.78823	31.9399	0.848334	26.9132	0.449915	30.9561	0.237532	46.7012	0.332541	32.6058	0.186529	42.3538	0.609222	32.1639	0.156175	42.9419	0.709375	31.144	0.445564	37.3543	0.444332	42.0877								0.335582	42.3656	0.306729	38.2384	0.20892	47.8437	0.12545	50.9422					0.295321	36.9652							0.419697
0.635952	31.9746	0.52582	26.942	0.635309	31.1129	0.282674	47.0534	0.387109	32.6842	0.269926	42.4832	0.455983	32.2269	0.61687	43.2327	0.571646	31.776	0.536977	37.5863	0.121918	42.1456								0.208402	42.3806	0.62124	38.6167	0.21438	48.064	0.187148	51.0311					0.284135	37.9424							0.442571
0.406489	32.4811	0.302454	27.2016	0.655967	31.7724	0.17086	47.1476	0.547795	32.7281	0.249255	43.7268	0.570042	32.3811	0.520851	43.5519	0.485383	31.8285	0.533837	37.7452	0.316466	42.4995								0.412603	42.578	0.466914	39.3582	0.118757	48.9703	0.162651	51.3514					0.319407	38.206							0.599829
0.630401	32.5149	0.434414	27.5697	0.783676	31.9399	0.261345	47.2179	0.276344	32.7956	0.172883	44.2701	0.619736	32.9761	0.311644	43.7887	0.231184	32.2322	0.661014	37.883	0.355002	42.8642								0.200152	42.847	0.484613	40.1399	0.218366	49.4247	0.102562	51.4137					0.274691	38.4068							0.970886
0.775689	32.7206	0.429987	28.1548	0.632612	31.9746	0.340532	47.3048	0.427885	33.0522	0.169762	45.0155	0.245545	33.407	0.372938	43.9878	0.273132	32.4692	0.578917	37.8838	0.470009	43.0026								0.346724	43.3744	0.266912	40.4981	0.200972	49.8148	0.157762	51.6478					0.179256	38.655							0.630015
0.52258	32.9347	0.718879	28.7	0.405385	32.4811	0.27522	47.4249	0.350764	33.1995	0.170083	45.2112	0.799689	34.8332	0.595932	43.9984	0.692792	32.9278	0.717237	38.4254	0.305777	43.3049								0.308139	43.5268	0.175952	41.3643	0.233848	50.685	0.214637	52.169					0.17863	39.5521							0.63364
0.653785	33.2618	0.547919	28.764	0.629063	32.5149	0.288739	48.4947	0.2837	33.3282	0.258494	45.2141	0.950657	35.1493	0.373503	44.24	0.30951	33.3597	0.481775	38.8784	0.182058	44.9073								0.198086	43.8137	0.33338	41.3882	0.120247	51.8664	0.206686	52.2694					0.240548	40.247							0.495973
0.574245	33.3461	0.58052	29.0621	0.769631	32.7206	0.141625	48.5176	0.660124	33.8416	0.214392	45.3214	0.185477	35.5984	0.51816	45.1868	0.402109	33.5076	0.612089	38.974	0.282284	44.9115								0.311903	44.6351	0.350988	41.5978	0.203273	52.0355	0.151541	52.853					0.373949	40.4347							0.600148
0.661312	33.6477	0.516374	29.1619	0.520746	32.9347	0.324366	49.3251	0.27745	34.0038	0.290896	45.4234	0.41245	36.1187	0.620857	45.3338	0.447864	33.7964	0.418418	38.9945	0.118103	46.2248								0.296546	44.7181	0.34148	41.8336	0.149957	53.8551	0.264928	52.9					0.267189	40.6							0.515383
0.897507	33.8391	0.528764	29.1979	0.651372	33.2618	0.29196	49.3252	0.558955	34.204	0.284231	45.59	0.277756	36.7534	0.480273	45.7228	0.359945	34.0256	0.48727	39.048	0.137131	46.2484								0.271439	44.9155	0.514965	41.8656	0.209694	53.9796	0.254604	53.4196					0.248591	40.6621							1.03418
0.494847	33.9208	0.377081	29.2164	0.568532	33.3461	0.140519	49.7025	0.337689	34.2839	0.209544	45.6294	0.617763	36.7568	0.280281	45.8929	0.246626	34.5069	0.374181	39.5659	0.153731	46.452								0.287971	45.5002	0.378995	41.99	0.24706	54.342	0.212453	55.4523					0.223401	40.8858							0.268771
0.682084	34.2111	0.596443	29.2377	0.658461	33.6477	0.265304	50.6092	0.120018	34.9207	0.16587	46.1886	0.275551	37.2569	0.358792	46.2425	0.163657	34.5589	0.446719	40.6105	0.171088	47.1156								0.117592	45.9227	0.510861	42.4784	0.1422	54.6883	0.145681	58.556					0.204497	41.8913							0.439285
0.500089	34.2463	0.820351	29.3271	0.894633	33.8391	0.349319	50.9237	0.301917	35.4544	0.401733	47.038	0.957901	37.274	0.28411	46.7082	0.596413	34.8587	0.619674	40.7038	0.335898	47.6687								0.170685	45.9943	0.334713	42.4906	0.169521	55.3036	0.128017	59.349					0.181073	42.4338							0.525769
0.844349	34.8985	1.08253	29.3324	0.493154	33.9208	0.30195	51.3265	0.278038	35.9906	0.297101	47.0688	0.995433	37.8935	0.377762	47.1796	0.575838	34.9535	0.375319	41.038	0.121014	48.3456								0.212513	47.1229	0.509689	43.3021	0.128521	56.9611	0.158689	60.8384					0.183449	43.0993							0.544027
0.526712	34.9031	0.610095	31.4711	0.680833	34.2111	0.251709	51.7782	0.147711	36.8626	0.157742	47.176	0.971452	37.9067	0.479043	47.6086	0.22761	35.2241	0.442204	41.2837	0.299765	48.8814								0.231607	47.1395	0.701426	45.0103	0.311805	57.8867	0.125997	61.0093					0.196714	43.143							0.53888
0.614896	34.9167	0.419016	31.6137	0.499036	34.2463	0.129476	52.1852	0.387777	36.9946	0.257569	47.4422	0.574177	38.2097	0.140424	48.945	0.557295	35.3481	0.727531	41.2982	0.181655	49.0588								0.114293	47.2484	0.378415	45.2002	0.13713	59.5289	0.204935	61.2478					0.255543	43.185							0.926128
0.542506	35.3066	0.283273	31.6138	0.842452	34.8985	0.25925	52.2324	0.309915	37.166	0.371811	47.8591	0.388384	38.5232	0.361672	48.963	0.36595	35.6938	0.555458	42.3686	0.121738	49.0617								0.418358	47.6241	0.446376	45.2347	0.18276	59.6437	0.215188	61.348					0.276788	43.296							0.636665
0.504908	35.3161	0.829068	31.6413	0.524019	34.9031	0.208033	52.4607	0.311634	37.7033	0.308216	48.6556	0.540472	38.5309	0.463623	49.2497	0.206787	35.8594	0.515175	42.8795	0.145215	50.2659								0.253645	47.7154	0.298323	45.4775	0.242432	59.7443	0.151415	63.7041					0.111254	43.3754							0.975017
0.553296	35.3832	0.489824	31.7851	0.613507	34.9167	0.23549	54.5494	0.45628	38.0122	0.28064	50.3639	0.176865	38.5625	0.250959	50.2216	0.555025	36.4236	0.599365	43.3468	0.150715	50.6071								0.166457	48.4561	0.319068	45.7345	0.185556	60.8682	0.1668	63.8478					0.219267	43.4146							1.14193
0.60759	35.4492	0.364641	31.9432	0.538552	35.3066	0.186494	55.2784	0.194495	38.5982	0.30256	51.0199	0.523844	38.5731	0.187422	50.6124	0.633644	36.5504	0.388754	43.6157	0.120703	50.7054								0.104258	48.6139	0.313398	45.7973	0.119701	61.4789	0.190985	64.522					0.242219	43.539							0.451373
0.342006	35.6385	0.603327	32.1402	0.499453	35.3161	0.247691	55.6405	0.289566	38.6467	0.233694	52.0678	0.312439	38.6819	0.464938	51.2944	0.416835	36.9967	0.427175	44.0286	0.201199	50.7306								0.170365	49.4008	0.583243	46.0136	0.179315	61.6398	0.148225	65.2367					0.216374	43.8821							0.532032
0.435213	35.6622	0.359425	32.4085	0.551846	35.3832	0.219168	55.7793	0.221357	38.9295	0.231558	52.166	0.602089	39.3728	0.198027	51.7552	0.253445	37.0256	0.372186	44.4085	0.144547	51.1195								0.181164	49.5314	0.101041	46.0719	0.175554	62.5015	0.146023	65.5071					0.223354	44.4007							0.981814
0.560388	35.854	0.661189	32.4499	0.602931	35.4492	0.108691	56.6287	0.272729	39.4262	0.314797	52.3257	0.812041	39.5515	0.408967	51.8937	0.247287	37.2298	0.6226	44.4906	0.203664	52.1195								0.194125	49.7798	0.376015	46.4496	0.181934	63.0474	0.187489	65.6788					0.280544	44.4031							0.457667
0.404441	36.1748	0.10107	32.7062	0.33943	35.6385	0.20766	56.9283	0.253453	39.4283	0.155129	52.6931	0.706165	39.6204	0.303085	52.3877	0.529972	37.7679	0.567079	44.4999	0.138771	52.4128								0.29224	49.83	0.339004	46.8876	0.102935	63.524	0.203592	65.82					0.235375	45.3876							0.507661
0.527592	36.379	0.375909	32.9417	0.433703	35.6622	0.241319	57.7121	0.227485	39.6156	0.244015	53.1379	0.339802	39.6936	0.230256	52.8972	0.455189	37.9532	1.02362	44.5376	0.12276	52.546								0.236769	49.8368	0.890218	47.48	0.168517	64.1147	0.168265	68.097					0.190355	46.7944							0.623673
0.378512	36.5736	0.316784	33.3446	0.553194	35.854	0.222152	58.567	0.206607	39.7021	0.226318	53.2695	0.424577	39.8314	0.653773	53.2293	0.639876	38.0041	0.765133	44.6627	0.133719	53.6525								0.180202	49.9026	0.358176	47.688	0.175987	64.8935	0.136531	68.5829					0.122076	47.0091							0.905252
0.499536	36.7173	0.418994	33.3625	0.402794	36.1748	0.213008	58.6069	0.144378	40.1324	0.184974	53.6527	0.469814	40.0666	0.166336	53.4442	0.158908	38.7729	0.847588	45.4282	0.190091	53.7792								0.120979	49.9827	0.374959	47.8544	0.156983	65.4442	0.18658	68.9449					0.187997	49.5398							0.349385
0.671543	37.3231	0.403507	33.532	0.526244	36.379	0.183047	58.6501	0.151215	40.3563	0.329834	53.9498	0.493051	40.188	0.484904	53.4828	0.924664	38.827	0.513143	45.5458	0.276114	53.9057								0.145489	50.489	0.497627	48.2231	0.211519	66.1898	0.192879	68.9659					0.149285	51.0063							0.437594
0.44051	37.4218	0.652594	33.6438	0.376746	36.5736	0.278773	58.9456	0.147929	40.5512	0.189773	54.6063	0.741832	40.4358	0.412776	53.8452	0.432928	39.088	0.610156	45.7683	0.143137	55.4985								0.295819	50.822	0.314561	48.2508	0.126199	68.399	0.140283	71.6118					0.122523	51.0484							0.498313
0.520303	37.5832	0.454263	33.6689	0.492151	36.7173	0.306904	59.0252	0.254445	40.6757	0.1568	54.6471	0.218685	41.1594	0.253137	54.3632	0.509878	39.3453	0.419179	45.8531	0.172299	56.0626								0.122773	50.9708	0.1989	48.2566	0.155054	68.4808	0.167151	74.1442					0.192533	52.1291							0.72169
0.263905	37.7484	0.445613	33.956	0.670256	37.3231	0.196009	59.1843	0.579038	41.1387	0.132158	55.3991	0.317205	41.4259	0.492103	54.5429	0.184859	39.5009	0.204582	45.9215	0.255755	57.1439								0.137589	50.9821	0.387194	48.3585	0.125896	68.7702	0.219584	74.6924					0.116544	54.0157							0.466702
0.665371	38.1298	1.03002	34.0932	0.434475	37.4218	0.185621	59.1849	0.177639	41.1899	0.132287	55.8021	0.181625	41.6677	0.32811	54.725	0.457672	39.833	0.670831	46.826	0.141213	57.8769								0.284236	52.8627	0.486819	48.4244	0.150779	69.0223	0.157172	74.7049					0.118249	54.3603							0.779887
0.464502	38.2518	0.685921	34.6874	0.517698	37.5832	0.223549	59.7984	0.327871	41.346	0.218646	56.5732	0.463642	42.2753	0.469685	55.5547	0.834033	40.2315	0.568124	46.8785	0.12326	59.4004								0.161	52.9175	0.625148	49.0176	0.144924	69.2842	0.151756	75.5196					0.123564	54.4338							0.3942
0.540778	38.3246	0.49699	34.8114	0.254882	37.7484	0.22749	59.85	0.334056	41.7823	0.214007	57.5735	0.68419	42.383	0.451457	56.4383	0.458506	40.4908	0.511511	46.8913	0.246006	59.6522								0.173695	53.8484	0.558303	49.1261	0.156861	71.2246	0.231683	77.4239					0.129692	54.4828							0.415621
0.73739	39.2046	0.430379	34.9252	0.664125	38.1298	0.101713	59.9053	0.127744	42.1535	0.136537	58.5535	0.376278	43.0526	0.244875	56.479	0.394664	40.9536	0.508425	47.128	0.192444	60.0814								0.264621	54.4931	0.498857	49.6132	0.238495	71.8558	0.15776	78.5034					0.24392	54.4973							0.625027
0.418787	39.256	0.419775	34.9499	0.462893	38.2518	0.149185	60.2272	0.283654	42.1841	0.316149	59.5313	0.393389	43.0823	0.453364	56.5881	1.1072	41.5747	0.25438	47.4051	0.128628	60.1677								0.324705	55.83	0.33008	49.6471	0.249394	71.8937	0.138494	81.6655					0.13767	54.9457							1.03523
0.291726	39.4884	0.370493	35.0532	0.535372	38.3246	0.197876	60.989	0.212768	42.5457	0.126073	59.7398	0.472415	43.2167	0.317862	56.5885	0.389349	41.7743	0.401677	47.8377	0.120685	60.396								0.153658	56.3333	0.162234	49.6574	0.235292	72.4712	0.152083	84.7749					0.18955	56.1914							0.25563
0.870908	39.6239	0.493637	35.1543	0.73518	39.2046	0.198094	61.5917	0.162975	42.7967	0.130473	60.0124	0.396549	43.5947	0.563992	57.5649	0.172032	41.777	0.127187	48.1849	0.122642	60.6967								0.254284	56.5805	0.329668	49.7447	0.177031	74.6826	0.121857	85.0771					0.125685	57.0204							0.857899
0.667972	39.7399	0.880024	35.1869	0.417526	39.256	0.152836	61.7125	0.266174	43.1164	0.14764	60.4578	0.470303	43.9779	0.329411	58.3222	0.360336	41.7972	0.422364	48.2565	0.141127	61.2403								0.117518	56.8116	0.630091	49.771	0.250882	75.3045	0.153472	86.251					0.18237	57.349							0.642102
0.506342	39.9528	0.580434	35.3043	0.284248	39.4884	0.168269	64.1623	0.297565	43.1315	0.184995	60.5224	0.315077	44.1951	0.522714	58.8413	0.371415	41.9554	0.487294	48.727	0.103394	62.279								0.113511	57.104	0.361316	49.9055	0.174348	76.5174	0.181459	87.4777					0.241321	58.6585							0.366555
0.486013	40.0102	0.688522	35.3171	0.866789	39.6239	0.152484	64.2313	0.27354	43.6561	0.12984	61.7162	0.553757	45.1314	0.230992	59.0406	0.366465	42.3217	0.384467	48.7629	0.126816	63.0447								0.23053	59.2356	0.528335	50.7198	0.194488	77.8048	0.155844	87.9998					0.160484	60.7332							0.506793
0.57032	40.0638	0.734476	35.4436	0.665231	39.7399	0.210387	64.5875	0.273486	43.7817	0.111294	63.3122	0.70259	45.1718	0.316679	59.0575	0.208947	42.3692	0.36283	49.7463	0.241805	63.5304								0.149558	59.8186	0.348858	51.3075	0.140457	78.0691	0.109124	88.7806					0.182783	61.825							0.315108
0.392871	40.075	0.555061	35.5467	0.505341	39.9528	0.121232	64.6518	0.329407	44.1565	0.205995	64.8131	0.448452	45.2744	0.378395	59.4372	0.562299	42.6794	0.669314	49.7784	0.107154	64.4371								0.25992	59.9734	0.29467	51.4249	0.124864	81.8458	0.12445	91.6026					0.141024	62.2539							0.389024
0.35467	40.3	0.8854	35.6797	0.48433	40.0102	0.186597	65.6081	0.240061	44.4041	0.196606	65.3104	0.40929	45.3127	0.271733	59.4589	0.220388	42.8827	0.514875	49.8587	0.136081	64.6295								0.336376	60.0586	0.303665	51.8974	0.104107	83.4647	0.106311	95.9905					0.19328	64.3093							0.717112
0.274683	40.3493	0.686475	35.8497	0.567954	40.0638	0.149733	65.8723	0.105251	44.9579	0.274111	65.7019	1.18122	45.6206	0.475453	59.627	0.477655	43.1296	0.29063	50.2112	0.213641	64.8434								0.129942	60.6042	0.293902	51.9396	0.19238	83.9591	0.167463	98.5385					0.164	66.4343							0.362381
0.649555	40.369	0.337855	36.0242	0.391916	40.075	0.205557	66.1483	0.174956	45.2795	0.142137	66.3594	0.626805	45.9917	0.389071	59.8251	0.421008	43.4121	0.49252	50.3778	0.123373	68.3377								0.164111	60.6848	0.173199	52.2714	0.14499	84.1359	0.109189	98.5513					0.16555	68.1307							0.446214
0.476338	40.6922	0.151808	36.058	0.35005	40.3	0.169052	67.8941	0.210474	45.4333	0.338676	67.1103	0.525091	46.1381	0.346839	60.1999	0.356572	43.881	0.423365	52.2525	0.203663	70.181								0.180361	61.3385	0.456159	52.2966	0.116501	85.9939	0.108742	98.8813					0.121916	68.1607							1.34912
0.340265	40.9946	0.48517	36.1677	0.269111	40.3493	0.197668	69.0402	0.451129	45.4377	0.156128	69.4521	0.832015	46.2757	0.221848	61.7448	0.157032	44.0933	0.234803	52.9867	0.146247	70.4635								0.243603	61.8637	0.199829	52.773	0.112359	86.9037	0.146498	102.486					0.120062	68.974							0.363809
0.627663	41.0312	0.95594	36.4129	0.647581	40.369	0.147853	69.6185	0.318237	45.6354	0.250246	69.7252	0.260664	46.4306	0.44709	63.0123	0.225916	44.2459	0.288647	53.2103	0.110445	70.7722								0.249991	62.174	0.367699	53.8267	0.227342	87.3437	0.111753	107.945					0.131881	69.1275							0.421648
0.491623	41.1754	0.695538	36.4634	0.472278	40.6922	0.302929	70.5542	0.319628	45.9293	0.183361	69.8318	0.405584	47.1362	0.354593	63.3029	0.102293	45.5581	0.141016	53.5874	0.195815	71.7677								0.199914	62.1886	0.321347	54.0253	0.142929	89.4346	0.102887	108.823					0.203773	70.1081							0.483487
0.157637	41.3243	0.295096	36.629	0.33931	40.9946	0.176214	70.5731	0.285128	46.0164	0.287691	70.7391	0.512367	47.2663	0.264417	63.689	0.335117	46.1522	0.10824	53.6273	0.136307	72.4191								0.196926	62.331	0.34157	54.3943	0.113935	90.3066	0.141882	114.052					0.213931	74.6655							0.389518
0.5074	41.7444	0.407488	37.286	0.626792	41.0312	0.173631	70.6407	0.142357	46.0633	0.241354	71.5647	0.456238	47.4111	0.255797	63.7095	0.481162	46.4936	0.179929	53.8973	0.167727	73.4761								0.270379	62.3838	0.291232	54.6117	0.217159	91.2115	0.141808	118.042					0.185537	75.6292							0.299586
0.553249	42.3475	0.420702	37.5671	0.153243	41.3243	0.141849	71.2245	0.500014	46.2091	0.2112	71.9065	0.179197	47.5341	0.313924	63.8124	0.123389	46.8702	0.485614	53.9519	0.187677	73.7006								0.296837	63.9688	0.384922	54.7686	0.118148	92.788	0.152508	122.56					0.200494	78.3256							0.68108
0.405271	42.4396	0.382777	37.7118	0.504803	41.7444	0.176923	72.8934	0.208444	46.2312	0.20006	72.6885	0.36314	47.7423	0.148193	64.1488	0.426366	46.9076	0.371846	54.3335	0.115057	73.8052								0.296221	64.0815	0.454746	54.7987	0.133135	97.2502	0.101883	122.646					0.165797	79.148							0.198774
0.391695	43.3911	0.399697	37.7593	0.549595	42.3475	0.203446	73.4006	0.296272	46.4038	0.153332	74.4641	0.152854	47.79	0.181753	64.8395	0.506636	47.3136	0.409949	54.6153	0.154478	74.0815								0.186994	64.1341	0.324218	55.787	0.113723	100.225	0.122439	126.361					0.147588	81.1512							0.381925
0.550121	43.8187	0.438431	38.025	0.404376	42.4396	0.16819	73.4603	0.231644	46.9622	0.173105	74.7801	0.542402	48.0911	0.193212	65.4639	0.315238	47.516	0.440613	55.4089	0.10322	74.189								0.229415	64.1808	0.215425	56.0191	0.147667	100.675	0.137769	131.234					0.123398	86.4444							0.45481
0.534037	44.279	0.525039	38.0324	0.386106	43.3911	0.138794	74.0112	0.173399	47.3972	0.180976	74.9213	0.34094	49.7569	0.101818	65.9389	0.197592	47.9289	0.22748	55.8667	0.108844	75.2481								0.156467	65.4407	0.499815	56.1373	0.188337	101.226	0.212363	137.285					0.168821	88.6385							0.68592
0.603495	44.2868	0.270973	38.153	0.547126	43.8187	0.128064	74.6697	0.18504	47.6652	0.111536	74.9969	0.626116	50.2923	0.39639	66.0947	0.347705	48.5626	0.36752	56.2552	0.191474	76.5433								0.172911	67.0966	0.272124	56.1531	0.234625	102.305							0.128515	89.3503							0.478635
0.361535	44.5383	0.498582	38.1704	0.531516	44.279	0.15673	74.7278	0.239788	48.419	0.187833	75.7373	0.536949	50.85	0.366056	66.7399	0.461247	48.7331	0.401134	56.918	0.168692	76.7042								0.112603	67.1364	0.288319	56.237	0.219151	103.476							0.120447	90.1462							0.369019
0.556132	44.962	0.39638	38.2158	0.599311	44.2868	0.105849	75.2184	0.307993	49.1221	0.107378	76.4123	0.606915	51.1223	0.199926	68.7117	0.2728	50.1272	0.230293	56.9505	0.174218	76.7326								0.291838	68.2179	0.236189	56.6859	0.165629	111.942							0.154394	95.8141							0.449939
0.399015	45.3032	0.466215	38.4994	0.360558	44.5383	0.175361	75.3296	0.238147	49.4943	0.19874	77.0662	0.450059	51.4705	0.284201	68.7357	0.200802	50.2453	0.353784	57.2622	0.16048	77.0433								0.108356	68.7841	0.298552	56.9868	0.104216	112.724							0.145737	95.8467							0.349867
0.325522	46.0637	0.509652	38.7648	0.554756	44.962	0.152533	76.1163	0.260826	50.2326	0.10369	77.2068	0.513911	51.9458	0.108669	68.888	0.614667	51.0167	0.612058	57.4177	0.1024	83.2216								0.187425	71.0349	0.384126	57.0516	0.107731	113.414							0.103338	101.815							0.591103
0.446943	46.1136	0.285306	39.4127	0.398191	45.3032	0.170238	76.687	0.10175	51.1843	0.13907	79.1135	0.579756	52.5663	0.299235	69.2177	0.492085	52.1359	0.164806	57.5386	0.125336	83.5407								0.100826	71.1747	0.467583	57.1389	0.138236	116.98							0.107927	105.455							0.106791
0.504608	46.1723	0.46636	39.7078	0.322805	46.0637	0.199698	76.7496	0.441703	51.4045	0.126066	79.9903	0.328792	53.0099	0.244258	70.1173	0.417692	52.9051	0.427644	58.1661	0.101994	85.8028								0.158344	71.3026	0.111451	57.6108	0.140953	118.753							0.103319	112.845							0.320909
0.42075	46.541	0.406752	39.9131	0.443933	46.1136	0.158191	77.93	0.230889	51.577	0.119797	80.9718	0.303874	53.3229	0.433581	70.612	0.299411	53.0586	0.150757	58.2124	0.107054	85.8379								0.173334	73.484	0.328133	57.9806	0.130576	123.579							0.122951	115.406							0.489123
0.450591	46.6769	0.413723	39.9192	0.502653	46.1723	0.181672	79.9695	0.132218	52.165	0.112904	81.0253	0.100427	54.0686	0.254116	71.2321	0.488486	53.3681	0.406229	58.4701	0.177417	86.2878								0.241462	73.5955	0.177032	58.1962									0.144578	125.721							0.395481
0.309621	46.7508	0.617804	40.3224	0.419361	46.541	0.22158	80.8012	0.1088	53.3221	0.113885	81.2152	0.617794	54.2523	0.256392	71.9054	0.341864	54.3073	0.470279	58.6186	0.154803	87.6452								0.189471	73.8621	0.146465	58.4591									0.150325	138.66							0.411576
0.367119	46.8604	0.394023	40.6477	0.448675	46.6769	0.12512	83.2402	0.126336	54.3115	0.10818	81.321	0.438875	54.4156	0.326181	72.3058	0.189089	54.4597	0.484141	58.7221	0.140762	90.1								0.198029	74.317	0.107329	58.46																	0.280081
0.532758	47.0266	0.376567	40.9645	0.304911	46.7508	0.132764	84.7922	0.143631	54.4745	0.125892	81.4619	0.380402	54.9365	0.404936	73.1441	0.195069	54.6047	0.223895	59.4254	0.112108	99.8121								0.117151	74.6468	0.196254	58.6175																	0.510306
0.740501	47.2299	0.36766	41.1909	0.365386	46.8604	0.129012	85.7524	0.302895	55.9372	0.149198	83.8796	0.427889	55.527	0.166415	73.5965	0.252811	54.8266	0.368621	59.8618	0.166237	101.716								0.143318	74.7237	0.194537	58.8003																	0.341734
0.4442	47.318	0.406942	41.2244	0.531675	47.0266	0.124308	86.4457	0.190155	56.2548	0.182292	84.0429	0.619214	55.7212	0.246301	74.8905	0.170421	56.1112	0.155187	60.1136	0.118354	104.972								0.101642	74.9459	0.306863	59.9103																	0.520376
0.457817	47.4631	0.272752	41.5478	0.739237	47.2299	0.183471	86.7656	0.100614	56.2632	0.12781	84.2173	0.359053	55.7798	0.165968	75.9955	0.188367	56.2182	0.37573	60.2819	0.133694	122.984								0.190061	74.9757	0.33975	60.5691																	0.626601
0.348404	47.6924	0.424535	41.7136	0.440843	47.318	0.149933	86.8557	0.175764	56.9887	0.209492	85.0098	0.263612	56.1486	0.124634	77.0686	0.422662	56.5234	0.366694	60.4693										0.178161	75.0945	0.267864	60.5704																	0.362259
0.531659	48.0475	0.33176	41.7635	0.456842	47.4631	0.141382	88.8989	0.210738	57.5551	0.133437	85.3336	0.33346	56.1803	0.161236	77.2019	0.104524	56.9063	0.372752	60.6032										0.227314	75.2176	0.19589	60.6214																	0.302519
0.5218	48.0517	0.196439	41.8808	0.343745	47.6924	0.133467	93.0246	0.200105	58.0877	0.145333	86.383	0.287497	56.2161	0.138804	77.5988	0.135517	57.0897	0.287584	61.1504										0.188987	76.7803	0.19072	60.6603																	0.420428
0.476866	48.5826	0.263031	41.9456	0.527895	48.0475	0.116596	94.9844	0.280129	58.3526	0.139164	86.5078	0.191376	56.854	0.297916	78.7908	0.340927	57.7683	0.306999	62.6518										0.185817	78.6502	0.338085	61.1208																	0.435514
0.338825	48.8552	0.277932	41.9588	0.520666	48.0517	0.127446	97.766	0.328685	58.5908	0.146646	86.6715	0.254554	57.0499	0.206759	79.4882	0.119204	57.7877	0.267937	62.682										0.201768	79.4225	0.277493	61.205																	0.375906
0.432987	49.0952	0.31827	42.08	0.34074	48.3342	0.109892	104.109	0.18408	58.9906	0.122174	88.9036	0.464089	57.3911	0.254619	80.2816	0.304333	58.7093	0.293688	63.1461										0.134681	81.2665	0.368723	61.6987																	0.345009
0.480344	49.1611	0.378882	42.2508	0.47567	48.5826	0.128427	110.525	0.166848	59.5474	0.116971	92.2007	0.413336	57.6433	0.115033	80.4187	0.371163	58.8353	0.480313	63.1976										0.245358	81.7068	0.206124	61.8325																	0.321794
0.393306	49.2341	0.200423	42.4662	0.337591	48.8552	0.100931	110.745	0.140758	59.8732	0.178113	95.2263	0.478617	57.6544	0.19929	80.8894	0.18408	59.3502	0.369385	63.786										0.212944	81.8643	0.37962	62.425																	0.303524
0.447623	49.4643	0.321883	42.5318	0.431424	49.0952	0.125305	111.273	0.109731	60.0408	0.118079	98.2639	0.428549	58.5287	0.294008	81.3179	0.403983	59.8901	0.378906	64.1751										0.126	82.2636	0.167567	62.877																	0.356468
0.366627	49.6863	0.200372	42.6541	0.476711	49.1611	0.116463	111.686	0.108092	60.5865	0.149776	98.4902	0.215838	58.9374	0.187777	81.9181	0.301601	59.9167	0.305958	64.7603										0.106718	83.9113	0.297117	63.0132																	0.557307
0.644732	50.0851	0.574912	42.6568	0.390743	49.2341	0.117534	113.73	0.231229	61.2423	0.139615	99.6449	0.441528	59.3883	0.164175	82.5504	0.338485	60.1775	0.204906	66.2148										0.142374	85.1616	0.178907	63.0794																	0.337773
0.40023	50.2865	0.360127	42.7058	0.446584	49.4643	0.102465	123.15	0.174188	61.3857	0.103485	100.343	0.171245	60.1418	0.156958	86.0753	0.230402	61.0208	0.329494	66.4202										0.19657	85.5252	0.284244	63.3031																	0.373356
0.316744	50.9844	0.427211	42.8909	0.365318	49.6863			0.173601	62.0359	0.104905	104.545	0.273767	60.521	0.139137	87.7499	0.458299	61.2193	0.291115	66.5216										0.124803	85.7826	0.309607	64.2513																	0.257402
0.478777	51.0964	0.579416	43.6417	0.64279	50.0851			0.233651	62.036	0.102688	106.306	0.820029	61.1229	0.156875	89.2063	0.386386	62.6385	0.317556	67.567										0.12221	86.3959	0.155422	64.6749																	0.479314
0.384758	51.5213	0.393366	43.6594	0.399346	50.2865			0.152587	62.2645	0.123119	111.128	0.502511	61.3494	0.175089	90.9573	0.236718	63.105	0.230126	68.1223										0.174198	87.246	0.274838	65.1461																	0.370494
0.349078	51.7647	0.30891	45.048	0.314021	50.9844			0.223387	62.3388	0.112617	118.766	0.642806	62.2837	0.157264	92.1916	0.411894	63.1741	0.157395	69.3271										0.106233	87.4394	0.416955	65.198																	0.403855
0.465234	52.1364	0.625907	45.1555	0.477751	51.0964			0.19151	63.0516			0.325234	62.7481	0.204535	94.6848	0.142094	63.5664	0.362104	69.5681										0.188286	88.8187	0.383462	65.2126																	0.452348
0.236438	52.49	0.582298	45.4809	0.381677	51.5213			0.128769	63.3103			0.430287	62.8267	0.152187	94.9653	0.403033	64.2561	0.163442	69.6224										0.157674	89.2278	0.161702	65.6798																	0.303335
0.398415	52.6499	0.368846	46.0035	0.347067	51.7647			0.331477	63.4241			0.746512	62.9353	0.126594	97.0984	0.262577	65.338	0.503147	70.0836										0.188548	90.5868	0.361006	65.7873																	0.389425
0.524071	52.8086	0.447518	46.0667	0.232532	52.49			0.128479	63.4241			0.415397	63.003	0.144693	98.708	0.18222	65.6023	0.204599	70.7443										0.140934	92.5749	0.335102	65.9187																	0.31152
0.424616	53.0266	0.643755	46.1231	0.396301	52.6499			0.226845	63.763			0.458765	63.7868	0.16009	103.144	0.14111	67.1608	0.495971	71.2245										0.193433	96.2925	0.476458	65.9229																	0.309091
0.358442	53.0712	0.288569	46.124	0.521671	52.8086			0.161263	64.2452			0.253953	63.9279	0.122462	103.576	0.198865	68.5489	0.211935	72.6817										0.145063	97.4766	0.219155	66.9155																	0.381203
0.460052	53.4753	0.678447	46.2218	0.423532	53.0266			0.111378	65.4069			0.211871	64.1492	0.152119	105.392	0.139029	68.7893	0.133487	73.9002										0.13729	98.8274	0.192063	67.3622																	0.326102
0.375558	53.5613	0.331866	46.364	0.356637	53.0712			0.157459	65.5567			0.499651	64.6808	0.131459	105.943	0.145007	68.9362	0.353477	74.0703										0.114796	98.9925	0.228349	67.8877																	0.315876
0.346949	54.2847	0.915488	46.373	0.456015	53.4753			0.112403	66.4663			0.607096	64.8552	0.14748	107.906	0.356841	69.748	0.363418	74.1443										0.147681	99.2783	0.194096	68.6765																	0.342264
0.318965	54.2952	0.28645	46.4782	0.373828	53.5613			0.134939	66.6742			0.338478	65.3992	0.158654	108.041	0.230831	69.8506	0.168595	74.5681										0.112065	99.2922	0.264604	68.9202																	0.436097
0.441883	54.5913	0.435919	46.4867	0.34381	54.2847			0.250912	66.7836			0.106308	66.1018	0.131447	111.178	0.151285	70.4049	0.160769	75.525										0.10787	101.354	0.191627	69.0878																	0.275421
0.544624	54.7096	0.499048	46.6555	0.314811	54.2952			0.168723	67.6935			0.44991	66.6999	0.143091	117.278	0.16624	70.6427	0.198656	76.96										0.211897	102.028	0.245744	69.1595																	0.291388
0.106505	54.8435	0.444956	47.1709	0.439432	54.5913			0.200751	69.439			0.351029	67.1982	0.110272	128.584	0.365449	71.0992	0.443052	77.6725										0.123706	102.808	0.298883	69.3102																	0.374618
0.313456	54.9448	0.560591	47.6248	0.540304	54.7096			0.185908	70.1498			0.560809	67.5564			0.24759	71.4293	0.186652	78.0329										0.175187	103.526	0.181191	70.505																	0.317284
0.416807	54.977	0.151226	47.6399	0.312199	54.9448			0.11843	70.3088			0.485176	69.6404			0.197707	72.9775	0.270537	79.0359										0.123982	108.328	0.416254	70.6906																	0.229584
0.162634	54.9967	0.222116	47.706	0.415516	54.977			0.169884	70.5871			0.283196	70.2982			0.420181	73.1623	0.122954	80.0667										0.11461	109.297	0.287467	70.8941																	0.101447
0.333058	55.7021	0.436359	47.773	0.160328	54.9967			0.17149	70.7691			0.376728	70.4205			0.286094	75.0702	0.186787	80.3823										0.167785	109.976	0.384674	71.2113																	0.16104
0.319787	55.7961	0.41634	47.8366	0.328755	55.7021			0.11462	71.6907			0.267569	70.6653			0.173557	75.2697	0.127529	80.55										0.167562	110.015	0.186293	71.8649																	0.241728
0.282351	56.4514	0.368893	48.0396	0.317378	55.7961			0.270013	72.0044			0.258682	71.0131			0.608703	75.3241	0.283306	81.9712										0.181849	111.944	0.17918	72.1924																	0.281428
0.442922	57.1724	0.345332	48.2506	0.278881	56.4514			0.174883	72.2178			0.353464	71.3472			0.211378	75.4274	0.269596	82.3167										0.106915	111.972	0.193022	72.4086																	0.192257
0.277742	57.286	0.356477	48.2645	0.441416	57.1724			0.184109	73.2274			0.364105	71.7562			0.124513	75.6416	0.421681	82.4102										0.101954	112.852	0.203107	72.5862																	0.321084
0.418514	57.7852	0.457163	48.4754	0.276355	57.286			0.150079	73.911			0.314375	71.9264			0.183392	75.9385	0.199706	82.4379										0.14575	114.334	0.100618	73.0528																	0.288945
0.407891	57.8943	0.108043	48.7365	0.417208	57.7852			0.167542	74.495			0.512828	74.8385			0.104527	76.5864	0.168631	83.0566										0.129419	115.24	0.298362	73.49																	0.291613
0.500915	58.2808	0.332584	48.8498	0.40652	57.8943			0.162042	74.9722			0.177651	75.4797			0.195135	77.008	0.253278	84.6539										0.112687	122.556	0.169784	73.8466																	0.325737
0.245517	58.3351	0.469764	48.8607	0.498267	58.2808			0.108176	75.6752			0.136758	76.2839			0.137726	77.9233	0.188424	86.3424										0.17563	123.113	0.204894	74.8415																	0.369095
0.265407	58.8188	0.393112	48.8765	0.244335	58.3351			0.143006	76.2962			0.230403	76.7018			0.270524	78.5281	0.201257	86.7416										0.138183	123.976	0.162881	74.9582																	0.343681
0.292723	59.1221	0.15031	49.114	0.263306	58.8188			0.224135	77.274			0.439615	77.0642			0.311812	78.6425	0.402862	87.1048										0.123536	127.885	0.157128	75.0263																	0.309928
0.354453	59.1937	0.310636	49.2748	0.291834	59.1221			0.289256	79.3598			0.441815	77.5925			0.139921	80.0858	0.158022	88.426										0.163971	131.542	0.17808	75.8126																	0.179749
0.267861	59.6441	0.251559	49.3079	0.353345	59.1937			0.180826	81.48			0.208623	77.8568			0.213258	81.2895	0.250755	88.4945										0.118346	136.054	0.159369	76.0871																	0.269662
0.230235	59.854	0.504093	49.8919	0.266548	59.6441			0.10683	82.3293			0.238535	79.1258			0.254971	81.3366	0.352494	89.1891												0.122334	76.1602																	0.323474
0.270898	60.1769	0.342978	49.9828	0.227867	59.854			0.141204	84.1454			0.395764	79.7762			0.133266	82.1854	0.123998	89.5388												0.201036	76.5208																	0.250653
0.117187	60.2508	0.349793	49.9987	0.266242	60.1769			0.127667	85.1828			0.491134	80.7055			0.119128	82.753	0.116972	91.5044												0.197396	76.7462																	0.295991
0.419595	60.2896	0.423737	50.1461	0.113692	60.2508			0.116918	86.5813			0.227315	81.0752			0.319192	84.7087	0.152426	91.9926												0.173475	76.8801																	0.162344
0.318073	60.7236	0.302774	50.1609	0.418535	60.2896			0.162715	86.6431			0.293381	81.1662			0.167708	85.4393	0.186253	93.0537												0.130551	77.1873																	0.242828
0.312187	60.8272	0.273118	50.1985	0.315815	60.7236			0.127957	86.9494			0.16771	81.6183			0.124157	85.5769	0.163855	93.6505												0.178605	78.4232																	0.304789
0.313392	61.2544	0.306537	50.2584	0.310666	60.8272			0.146067	87.8796			0.379752	82.3387			0.150194	86.0107	0.120287	94.0059												0.158441	80.8572																	0.216188
0.221299	61.258	0.454564	50.4361	0.310362	61.2544			0.167757	88.0049			0.130485	82.5899			0.103078	86.0168	0.344467	94.9225												0.263938	81.4763																	0.327899
0.385862	61.2719	0.316011	50.4632	0.384671	61.2719			0.141882	89.4318			0.176574	82.8406			0.171254	88.0156	0.272525	95.1021												0.146455	81.8888																	0.302512
0.267199	61.4379	0.397247	50.7115	0.265881	61.4379			0.163816	90.6548			0.131601	83.2749			0.19516	88.034	0.130797	96.7042												0.257344	81.9289																	0.101093
0.335746	61.4823	0.501849	50.7207	0.334867	61.4823			0.135966	91.8172			0.365407	83.3916			0.160856	88.8766	0.200642	97.7076												0.218529	82.8906																	0.239424
0.26613	61.6618	0.276428	50.819	0.264866	61.6618			0.101477	94.3969			0.328345	83.6052			0.153372	89.3409	0.216225	98.1751												0.159064	83.1512																	0.246348
0.326567	61.6932	0.439485	51.399	0.32441	61.6932			0.147978	94.7789			0.103738	83.7092			0.189575	90.0606	0.127675	100.793												0.15109	83.5066																	0.260621
0.169539	61.7425	0.300409	51.5273	0.163846	61.7425			0.101058	96.8632			0.292938	85.373			0.178813	90.1127	0.142155	101.365												0.260812	83.5128																	0.305987
0.259032	62.3073	0.187467	51.71	0.256655	62.3073			0.126596	100.981			0.142386	85.4923			0.204717	90.3341	0.251251	102.145												0.229256	83.7971																	0.11465
0.191618	62.5453	0.335249	51.9258	0.189662	62.5453			0.100273	101.254			0.123464	88.8024			0.104947	91.3151	0.182963	102.794												0.271193	83.7994																	0.338419
0.295173	62.8127	0.544367	52.5891	0.293997	62.8127			0.108677	102.34			0.154967	89.4183			0.259075	95.4204	0.180055	102.915												0.241958	84.2442																	0.174374
0.227261	63.2487	0.296979	52.8133	0.225417	63.2487			0.130224	103.543			0.271957	89.7136			0.161188	95.4601	0.122527	106.392												0.130315	84.4828																	0.286982
0.351583	63.2942	0.211497	53.899	0.348789	63.2942			0.102895	104.015			0.163109	90.1027			0.111562	96.1736	0.155764	108.948												0.227483	84.5407																	0.152142
0.38681	63.5405	0.289323	54.0411	0.384054	63.5405			0.183598	106.617			0.394082	91.1012			0.152643	96.2254	0.195893	109.466												0.253103	84.8648																	0.154799
0.212494	63.8033	0.452431	54.1095	0.207997	63.8033			0.106359	112.453			0.247932	91.5344			0.134423	96.6037	0.153304	110.315												0.276836	85.2605																	0.113802
0.213976	63.8272	0.307581	54.3562	0.212621	63.8272			0.100657	116.371			0.332812	93.4106			0.138659	97.4264	0.155955	112.198												0.156699	86.6127																	0.213017
0.18798	63.9702	0.406259	54.4649	0.184278	63.9702			0.101746	117.32			0.14826	93.4231			0.197244	97.4276	0.141734	114.504												0.262546	88.0149																	0.236193
0.205974	64.0179	0.290092	54.8359	0.201953	64.0179			0.106932	127.303			0.147398	94.2116			0.136656	97.645	0.116949	116.749												0.136412	88.8401																	0.19098
0.361902	64.8698	0.334756	55.6699	0.358523	64.8698			0.106434	127.501			0.160114	95.2183			0.232471	97.9502	0.120829	116.872												0.151312	89.0276																	0.18104
0.51753	65.8579	0.362175	55.9339	0.515711	65.8579							0.360806	95.6677			0.18763	98.1964	0.123056	116.953												0.157457	89.2404																	0.360519
0.309315	66.3715	0.151626	56.0295	0.308025	66.3715							0.165756	96.0543			0.188972	98.9223	0.149511	121.341												0.176995	89.4108																	0.31619
0.489481	66.7172	0.34274	56.1453	0.487983	66.7172							0.177546	96.1717			0.173747	99.2206	0.117024	124.145												0.141456	90.0448																	0.320893
0.277621	67.1146	0.180917	56.2132	0.276736	67.1146							0.470471	98.583			0.138648	99.2851	0.153162	127.943												0.101186	90.6526																	0.188
0.275544	67.8687	0.323861	56.2492	0.274074	67.8687							0.265511	100.23			0.170723	99.8975	0.101948	130.485												0.280195	92.8593																	0.219733
0.193031	68.4313	0.385412	56.6433	0.190061	68.4313							0.209171	101.043			0.25656	102.274														0.105229	93.3528																	0.112884
0.38841	68.7476	0.171404	57.0816	0.387198	68.7476							0.248231	102.065			0.124367	102.364														0.105229	93.3528																	0.170809
0.256723	68.9002	0.30471	57.0934	0.252698	68.9002							0.158329	102.924			0.219759	102.656														0.183066	93.6192																	0.248427
0.301707	68.9011	0.132796	57.2188	0.29982	68.9011							0.302435	102.962			0.194232	103.77														0.183066	93.6192																	0.145972
0.15128	69.3789	0.233309	57.7574	0.14873	69.3789							0.160853	104.008			0.15472	106.682														0.20445	95.3956																	0.183644
0.466475	69.8149	0.150248	57.8816	0.464013	69.8149							0.310793	105.532			0.163735	108.478														0.20445	95.3956																	0.343229
0.321734	69.8239	0.167018	58.4634	0.319039	69.8239							0.256959	110.316			0.116227	108.502														0.13025	96.0171																	0.149687
0.220131	70.0555	0.366525	59.2852	0.217196	70.0555							0.267716	110.736			0.154923	110.13														0.13025	96.0171																	0.262832
0.402744	70.293	0.284703	59.9329	0.267128	70.4102							0.196826	111.194			0.1629	111.017														0.200408	97.4308																	0.257762
0.267984	70.4102	0.326369	60	0.239023	71.2084							0.151831	111.661			0.149356	111.153														0.200408	97.4308																	0.267539
0.240373	71.2084	0.205901	60.0822	0.260285	71.3885							0.166787	112.56			0.101646	111.441														0.127313	97.4376																	0.182587
0.261432	71.3885	0.41113	60.2237	0.221344	71.6552							0.371485	114.141			0.139598	114.182														0.127313	97.4376																	0.199623
0.222897	71.6552	0.311001	60.2342	0.267499	71.7881							0.137664	120.412			0.132252	115.123														0.154163	97.5598																	0.150241
0.26958	71.7881	0.233724	60.2627	0.297518	71.8028							0.180547	120.598			0.116815	116.656														0.154163	97.5598																	0.228384
0.298641	71.8028	0.222439	60.3864	0.13355	72.0262							0.10596	121.532			0.177669	117.11														0.146336	98.2884																	0.337406
0.137747	72.0262	0.276322	60.4724	0.216491	72.3265											0.129211	118.479														0.146336	98.2884																	0.176253
0.217486	72.3265	0.349247	60.4952	0.161702	72.814											0.128333	119.639														0.125381	99.1082																	0.228221
0.164281	72.814	0.228362	60.6837	0.390763	72.9602											0.104323	121.486														0.125381	99.1082																	0.22989
0.392661	72.9602	0.269413	60.7656	0.178363	73.991											0.16805	122.817														0.219916	101.892																	0.236574
0.180306	73.991	0.196969	60.8679	0.259509	74.2992											0.101464	124.03														0.219916	101.892																	0.150829
0.260961	74.2992	0.272112	61.0838	0.141957	74.7143											0.152645	125.079														0.103171	101.963																	0.276858
0.144567	74.7143	0.224683	61.1173	0.147113	74.733											0.219062	125.638														0.103171	101.963																	0.288262
0.148853	74.733	0.175279	61.4513	0.18332	74.9175											0.128491	128.495														0.157895	103.663																	0.223239
0.185277	74.9175	0.259464	61.4577	0.178354	75.0377											0.11935	130.991														0.157895	103.663																	0.141247
0.180627	75.0377	0.247745	62.1953	0.255173	75.9003											0.200062	132.307														0.116728	105.91																	0.226922
0.102648	75.6362	0.217732	62.3028	0.279833	76.4932											0.105096	134.107														0.116728	105.91																	0.197154
0.256266	75.9003	0.134933	62.5137	0.148916	76.7303																										0.158602	106.227																	0.198181
0.280742	76.4932	0.256876	62.7967	0.158621	76.8998																										0.158602	106.227																	0.219808
0.153119	76.7303	0.299087	62.8928	0.232415	77.5841																										0.128945	106.844																	0.106955
0.162435	76.8998	0.108506	63.3705	0.338185	77.6196																										0.128945	106.844																	0.192025
0.233752	77.5841	0.199485	63.3708	0.318864	77.7355																										0.104956	108.843																	0.166201
0.341381	77.6196	0.357737	64.5702	0.131958	77.8172																										0.104956	108.843																	0.156413
0.319752	77.7355	0.111257	65.1038	0.301503	77.8401																										0.207571	111.152																	0.125557
0.133975	77.8172	0.295153	65.3126	0.278694	79.0225																										0.207571	111.152																	0.130136
0.302813	77.8401	0.270247	65.402	0.264299	79.0799																										0.13451	111.192																	0.164752
0.279989	79.0225	0.269521	65.516	0.184227	79.8339																										0.13451	111.192																	0.227751
0.267427	79.0799	0.15395	65.7506	0.204519	79.991																										0.153581	111.989																	0.188549
0.185806	79.8339	0.207152	65.8385	0.251694	80.0013																										0.153581	111.989																	0.210911
0.206453	79.991	0.21912	66.1237	0.241106	80.029																										0.169139	111.996																	0.139201
0.252733	80.0013	0.114181	66.791	0.211862	80.8769																										0.169139	111.996																	0.174408
0.243469	80.029	0.211345	67.0888	0.192484	81.199																										0.146625	115.396																	0.212705
0.21287	80.8769	0.207193	68.0563	0.212727	81.2231																										0.146625	115.396																	0.293404
0.193747	81.199	0.230719	68.0899	0.194857	81.2626																										0.19467	115.645																	0.11796
0.21372	81.2231	0.218056	68.2397	0.334457	82.5039																										0.19467	115.645																	0.147018
0.335553	82.5039	0.248411	69.3519	0.256762	83.0753																										0.14438	117.94																	0.182748
0.258567	83.0753	0.15423	69.4787	0.256412	83.3097																										0.14438	117.94																	0.118813
0.258931	83.3097	0.187426	69.6525	0.196259	83.3702																										0.191566	120.456																	0.140235
0.197511	83.3702	0.277616	70.277	0.314366	84.2008																										0.191566	120.456																	0.269257
0.316895	84.2008	0.15198	70.8283	0.287756	84.2416																										0.149231	121.58																	0.178451
0.289344	84.2416	0.318288	70.8957	0.238134	85.3044																										0.149231	121.58																	0.244155
0.242199	85.3044	0.124659	70.9931	0.21187	87.1495																										0.100028	122.591																	0.12058
0.214143	87.1495	0.143868	71.0027	0.173916	87.4828																										0.100028	122.591																	0.198428
0.175943	87.4828	0.207325	72.2263	0.153015	87.5775																										0.133247	123.766																	0.129877
0.154391	87.5775	0.15072	72.7681	0.268243	89.3677																										0.133247	123.766																	0.211869
0.100652	88.3616	0.17525	73.0113	0.110615	90.3347																										0.182282	124.271																	0.111491
0.269487	89.3677	0.185136	73.5016	0.152925	91.48																										0.182282	124.271																	0.202852
0.113203	90.3347	0.205247	74.1127	0.273412	91.6998																										0.103628	124.75																	0.141493
0.154408	91.48	0.245662	74.3327	0.255016	92.4033																										0.103628	124.75																	0.194795
0.274327	91.6998	0.210435	74.4016	0.202113	92.5739																										0.182138	125.869																	0.157388
0.256001	92.4033	0.210579	74.6029	0.185468	92.5743																										0.182138	125.869																	0.106174
0.203424	92.5739	0.176508	75.1567	0.15349	92.701																										0.145114	126.103																	0.148053
0.186985	92.5743	0.225334	76.2252	0.187446	92.7493																										0.145114	126.103																	0.150952
0.154691	92.701	0.118919	76.4952	0.159402	93.0144																										0.131913	127.171																	0.344343
0.188678	92.7493	0.197444	76.884	0.159052	93.9123																										0.131913	127.171																	0.106769
0.160381	93.0144	0.118734	77.1245	0.100823	93.9313																										0.122284	131.969																	0.210644
0.160341	93.9123	0.206215	77.2399	0.171028	94.0112																										0.122284	131.969																	0.158115
0.102428	93.9313	0.17383	77.2545	0.145385	94.1733																										0.109187	133.126																	0.170824
0.172146	94.0112	0.18076	77.4888	0.221355	95.3928																										0.109187	133.126																	0.162011
0.149075	94.1733	0.176684	77.4976	0.139665	95.8859																																												0.16259
0.222507	95.3928	0.222562	77.5044	0.192735	96.5078																																												0.125957
0.141977	95.8859	0.163423	78.0342	0.222953	96.7351																																												0.122248
0.194188	96.5078	0.248431	79.5807	0.216859	96.943																																												0.189598
0.225446	96.7351	0.170461	79.8999	0.147883	98.5622																																												0.151273
0.220049	96.943	0.110103	79.9873	0.300203	99.388																																												0.140883
0.149365	98.5622	0.23124	80.0769	0.121534	100.291																																												0.117835
0.301374	99.388	0.16451	80.3628	0.142773	100.524																																												0.155793
0.122948	100.291	0.140154	80.6739	0.160962	100.673																																												0.103475
0.144953	100.524	0.156383	81.1427	0.121876	101.066																																												0.134961
0.162244	100.673	0.130086	82.2037	0.15603	102.219																																												0.106883
0.123945	101.066	0.239407	82.7466	0.101835	102.576																																												0.131088
0.157213	102.219	0.144924	82.8369	0.167461	105.902																																												0.132867
0.10368	102.576	0.210314	83.1146	0.185187	106.485																																												0.138857
0.168601	105.902	0.145834	83.4851	0.199961	106.848																																												0.158854
0.186432	106.485	0.188046	83.5299	0.173313	107.42																																												0.186704
0.201709	106.848	0.16392	83.5631	0.114181	107.468																																												0.172143
0.175237	107.42	0.247797	84.2756	0.102618	109.151																																												0.140545
0.103907	109.151	0.168425	84.3479	0.150689	110.206																																												0.153545
0.152459	110.206	0.275804	84.9518	0.11797	112.466																																												0.106713
0.119234	112.466	0.129322	85.7082	0.140591	113.21																																												0.137214
0.142003	113.21	0.108961	86.0527	0.169704	117.438																																												0.130091
0.171137	117.438	0.121308	86.3265	0.16207	117.842																																												0.136828
0.164475	117.842	0.109354	88.8549	0.110663	118.012																																												0.134999
0.112119	118.012	0.16971	88.8989	0.192057	119.883																																												0.115463
0.19323	119.883	0.207968	89.151	0.138264	121.794																																												0.12716
0.139325	121.794	0.103808	90.5595	0.112033	123.263																																												0.139082
0.113882	123.263	0.110008	90.6116	0.109664	124.723																																												0.106822
0.110668	124.723	0.138492	90.7788	0.13307	131.758																																												0.118759
0.134204	131.758	0.157217	92.6075	0.15849	134.832
0.15997	134.832	0.133493	94.5232	0.109604	135.178
0.110752	135.178	0.114612	95.3865
		0.128176	96.9548
		0.108628	97.9231
		0.12182	100.461
		0.142642	100.91
		0.124622	101.442
		0.163807	101.467
		0.136746	102.337
		0.143793	102.376
		0.159229	102.533
		0.152819	102.862
		0.123281	103.941
		0.138532	105.784
		0.133297	106.69
		0.166854	106.911
		0.128618	109.111
		0.135452	109.263
		0.125802	110.571
		0.166551	112.451
		0.156389	114.431
		0.10398	115.869
		0.120916	121.147
		0.139694	121.393
		0.150297	121.399
		0.108433	123.66
		0.108312	126.731
[truncated: 39 more columns]
